# Supplementary material for: EBV BART MicroRNAs Target Multiple Pro-apoptotic Cellular Genes to Promote Epithelial Cell Survival
Source: PLoS Pathog. 2015 Jun 12;11(6):e1004979. doi: 10.1371/journal.ppat.1004979 (PMC4466530; doi:10.1371/journal.ppat.1004979)
Supplement: S2 Table — Shown are mature miRNA or passenger strand species expressed in C666 cells and captured by small RNA deep sequencing. Information including miRNA names, expression loci on the human or EBV genome, number of reads, percentage expression of miRNAs from pre-miRNA precursors, actual captured sequences and pre-miRNA sequences are provided. (XLS) [file ppat.1004979.s007.xls]

## Sheet: sheet 1
precursor	chromosome	strand	precursorStart	precursorEnd	matureName	AdjustedName	type	percentPrecursor	miRBase	matureStart	matureEnd	matureSequence	matureReadCount	PrecursorSequence
ebv-mir-bart1	EBVWT	+	139345	139414	ebv-mir-bart1-5p	ebv-mir-bart1-5p_-1_3	mature	0.43		139350	139372	TCTTAGTGGAAGTGACGTGCTGT	75186	GGGGGTCTTAGTGGAAGTGACGTGCTGTGAATACAGGTCCATAGCACCGCTATCCACTATGTCTCGCCCG
ebv-mir-bart1	EBVWT	+	139345	139414	ebv-mir-bart1-5p	ebv-mir-bart1-5p	mature	0.07	Y	139350	139373	TCTTAGTGGAAGTGACGTGCTGTG	13475	GGGGGTCTTAGTGGAAGTGACGTGCTGTGAATACAGGTCCATAGCACCGCTATCCACTATGTCTCGCCCG
ebv-mir-bart1	EBVWT	+	139345	139414	ebv-mir-bart1-3p	ebv-mir-bart1-3p	mature	0.09	Y	139386	139407	TAGCACCGCTATCCACTATGTC	15842	GGGGGTCTTAGTGGAAGTGACGTGCTGTGAATACAGGTCCATAGCACCGCTATCCACTATGTCTCGCCCG
ebv-mir-bart1	EBVWT	+	139345	139414	ebv-mir-bart1-3p	ebv-mir-bart1-3p_+1_3	mature	0.2		139386	139408	TAGCACCGCTATCCACTATGTCT	34735	GGGGGTCTTAGTGGAAGTGACGTGCTGTGAATACAGGTCCATAGCACCGCTATCCACTATGTCTCGCCCG
ebv-mir-bart10	EBVWT	+	147303	147392	ebv-mir-bart10*	ebv-mir-bart10*	mature	0	Y	147320	147341	GCCACCTCTTTGGTTCTGTACA	4629	CAGAGGAGTGTCCCGGGGCCACCTCTTTGGTTCTGTACATATTTTGTTATTGTACATAACCATGGAGTTGGCTGTGGTGCACTCCATCTG
ebv-mir-bart10	EBVWT	+	147303	147392	ebv-mir-bart10	ebv-mir-bart10_-2_3	mature	0.14		147355	147375	TACATAACCATGGAGTTGGCT	83906	CAGAGGAGTGTCCCGGGGCCACCTCTTTGGTTCTGTACATATTTTGTTATTGTACATAACCATGGAGTTGGCTGTGGTGCACTCCATCTG
ebv-mir-bart10	EBVWT	+	147303	147392	ebv-mir-bart10	ebv-mir-bart10_-1_3	mature	0.22		147355	147376	TACATAACCATGGAGTTGGCTG	125715	CAGAGGAGTGTCCCGGGGCCACCTCTTTGGTTCTGTACATATTTTGTTATTGTACATAACCATGGAGTTGGCTGTGGTGCACTCCATCTG
ebv-mir-bart10	EBVWT	+	147303	147392	ebv-mir-bart10	ebv-mir-bart10	mature	0.42	Y	147355	147377	TACATAACCATGGAGTTGGCTGT	241328	CAGAGGAGTGTCCCGGGGCCACCTCTTTGGTTCTGTACATATTTTGTTATTGTACATAACCATGGAGTTGGCTGTGGTGCACTCCATCTG
ebv-mir-bart11	EBVWT	+	147523	147608	ebv-mir-bart11-5p	ebv-mir-bart11-5p_-2_3	mature	0.29		147536	147557	TCAGACAGTTTGGTGCGCTAGT	20037	GGCTTCTGTTGGGTCAGACAGTTTGGTGCGCTAGTTGTGTGCTTAGCAGCAACGCACACCAGGCTGACTGCCTTAGCAGTGTGGCC
ebv-mir-bart11	EBVWT	+	147523	147608	ebv-mir-bart11-5p	ebv-mir-bart11-5p_-1_3	mature	0.14		147536	147558	TCAGACAGTTTGGTGCGCTAGTT	9753	GGCTTCTGTTGGGTCAGACAGTTTGGTGCGCTAGTTGTGTGCTTAGCAGCAACGCACACCAGGCTGACTGCCTTAGCAGTGTGGCC
ebv-mir-bart11	EBVWT	+	147523	147608	ebv-mir-bart11-5p	ebv-mir-bart11-5p	mature	0.1	Y	147536	147559	TCAGACAGTTTGGTGCGCTAGTTG	7304	GGCTTCTGTTGGGTCAGACAGTTTGGTGCGCTAGTTGTGTGCTTAGCAGCAACGCACACCAGGCTGACTGCCTTAGCAGTGTGGCC
ebv-mir-bart11	EBVWT	+	147523	147608	ebv-mir-bart11-3p	ebv-mir-bart11-3p_-1_3	mature	0.1		147574	147593	ACGCACACCAGGCTGACTGC	7284	GGCTTCTGTTGGGTCAGACAGTTTGGTGCGCTAGTTGTGTGCTTAGCAGCAACGCACACCAGGCTGACTGCCTTAGCAGTGTGGCC
ebv-mir-bart11	EBVWT	+	147523	147608	ebv-mir-bart11-3p	ebv-mir-bart11-3p	mature	0.01	Y	147574	147594	ACGCACACCAGGCTGACTGCC	1268	GGCTTCTGTTGGGTCAGACAGTTTGGTGCGCTAGTTGTGTGCTTAGCAGCAACGCACACCAGGCTGACTGCCTTAGCAGTGTGGCC
ebv-mir-bart11	EBVWT	+	147523	147608	ebv-mir-bart11-3p	ebv-mir-bart11-3p_+1_3	mature	0.18		147574	147595	ACGCACACCAGGCTGACTGCCT	12803	GGCTTCTGTTGGGTCAGACAGTTTGGTGCGCTAGTTGTGTGCTTAGCAGCAACGCACACCAGGCTGACTGCCTTAGCAGTGTGGCC
ebv-mir-bart12	EBVWT	+	147887	147969	ebv-mir-bart12	ebv-mir-bart12	mature	0.12	Y	147935	147956	TCCTGTGGTGTTTGGTGTGGTT	3081	CTGGTGACCTAACACCCGCCCATCACCACCGGACAGATTCTGAACTTGTCCTGTGGTGTTTGGTGTGGTTTTGGGGTACGCAG
ebv-mir-bart12	EBVWT	+	147887	147969	ebv-mir-bart12	ebv-mir-bart12_+1_3	mature	0.61		147935	147957	TCCTGTGGTGTTTGGTGTGGTTT	14779	CTGGTGACCTAACACCCGCCCATCACCACCGGACAGATTCTGAACTTGTCCTGTGGTGTTTGGTGTGGTTTTGGGGTACGCAG
ebv-mir-bart12	EBVWT	+	147887	147969	ebv-mir-bart12	ebv-mir-bart12_+2_3	mature	0.13		147935	147958	TCCTGTGGTGTTTGGTGTGGTTTT	3187	CTGGTGACCTAACACCCGCCCATCACCACCGGACAGATTCTGAACTTGTCCTGTGGTGTTTGGTGTGGTTTTGGGGTACGCAG
ebv-mir-bart13	EBVWT	+	148511	148596	ebv-mir-bart13	ebv-mir-bart13	mature	0.44	Y	148562	148584	TGTAACTTGCCAGGGACGGCTGA	14144	TTGGGCACCTCGATAACCGGCTCGTGGCTCGTACAGACGATTGTTTGGCTCTGTAACTTGCCAGGGACGGCTGACGATGTGTTTAG
ebv-mir-bart13	EBVWT	+	148511	148596	ebv-mir-bart13	ebv-mir-bart13_+1_3	mature	0.14		148562	148585	TGTAACTTGCCAGGGACGGCTGAC	4462	TTGGGCACCTCGATAACCGGCTCGTGGCTCGTACAGACGATTGTTTGGCTCTGTAACTTGCCAGGGACGGCTGACGATGTGTTTAG
ebv-mir-bart14	EBVWT	+	148730	148814	ebv-mir-bart14*	ebv-mir-bart14*	mature	0.05	Y	148743	148764	TACCCTACGCTGCCGATTTACA	12510	CAGGGGTGGCCGGTACCCTACGCTGCCGATTTACATAATATAAATTGTAAATGCTGCAGTAGTAGGGATCTGGACGCGCGACCTG
ebv-mir-bart14	EBVWT	+	148730	148814	ebv-mir-bart14	ebv-mir-bart14	mature	0.42	Y	148777	148798	TAAATGCTGCAGTAGTAGGGAT	104533	CAGGGGTGGCCGGTACCCTACGCTGCCGATTTACATAATATAAATTGTAAATGCTGCAGTAGTAGGGATCTGGACGCGCGACCTG
ebv-mir-bart14	EBVWT	+	148730	148814	ebv-mir-bart14	ebv-mir-bart14_+1_3	mature	0.33		148777	148799	TAAATGCTGCAGTAGTAGGGATC	80655	CAGGGGTGGCCGGTACCCTACGCTGCCGATTTACATAATATAAATTGTAAATGCTGCAGTAGTAGGGATCTGGACGCGCGACCTG
ebv-mir-bart15	EBVWT	+	139506	139583	ebv-mir-bart15	ebv-mir-bart15_-1_3	mature	0.29		139552	139572	GTCAGTGGTTTTGTTTCCTTG	23457	TGTGCCGCTTGGAGGGAAACATGACCACCTGAAGTCTGTTAACCAGGTCAGTGGTTTTGTTTCCTTGATAGAGACACA
ebv-mir-bart15	EBVWT	+	139506	139583	ebv-mir-bart15	ebv-mir-bart15	mature	0.54	Y	139552	139573	GTCAGTGGTTTTGTTTCCTTGA	43665	TGTGCCGCTTGGAGGGAAACATGACCACCTGAAGTCTGTTAACCAGGTCAGTGGTTTTGTTTCCTTGATAGAGACACA
ebv-mir-bart16	EBVWT	+	139775	139873	ebv-mir-bart16	ebv-mir-bart16_-3_3	mature	0.14		139794	139814	TTAGATAGAGTGGGTGTGTGC	13982	AGGCTTTCAGGTGTGGAATTTAGATAGAGTGGGTGTGTGCTCTTGTTTAATTACACCAAGATCACCACCCTCTATCCATATCCCACAATTGATAAACCT
ebv-mir-bart16	EBVWT	+	139775	139873	ebv-mir-bart16	ebv-mir-bart16_-2_3	mature	0.15		139794	139815	TTAGATAGAGTGGGTGTGTGCT	15338	AGGCTTTCAGGTGTGGAATTTAGATAGAGTGGGTGTGTGCTCTTGTTTAATTACACCAAGATCACCACCCTCTATCCATATCCCACAATTGATAAACCT
ebv-mir-bart16	EBVWT	+	139775	139873	ebv-mir-bart16	ebv-mir-bart16_-1_3	mature	0.2		139794	139816	TTAGATAGAGTGGGTGTGTGCTC	20268	AGGCTTTCAGGTGTGGAATTTAGATAGAGTGGGTGTGTGCTCTTGTTTAATTACACCAAGATCACCACCCTCTATCCATATCCCACAATTGATAAACCT
ebv-mir-bart16	EBVWT	+	139775	139873	ebv-mir-bart16	ebv-mir-bart16	mature	0.23	Y	139794	139817	TTAGATAGAGTGGGTGTGTGCTCT	22539	AGGCTTTCAGGTGTGGAATTTAGATAGAGTGGGTGTGTGCTCTTGTTTAATTACACCAAGATCACCACCCTCTATCCATATCCCACAATTGATAAACCT
ebv-mir-bart17	EBVWT	+	139893	139994	ebv-mir-bart17-5p	ebv-mir-bart17-5p	mature	0.14	Y	139914	139935	TAAGAGGACGCAGGCATACAAG	88760	GTTGAACAGGATGTGGCACCCTAAGAGGACGCAGGCATACAAGGTTATTACCCAGTCCTTGTATGCCTGGTGTCCCCTTAGTGGGACGCAGGCCTAGGTAGC
ebv-mir-bart17	EBVWT	+	139893	139994	ebv-mir-bart17-3p	ebv-mir-bart17-3p	mature	0.42	Y	139952	139974	TGTATGCCTGGTGTCCCCTTAGT	261340	GTTGAACAGGATGTGGCACCCTAAGAGGACGCAGGCATACAAGGTTATTACCCAGTCCTTGTATGCCTGGTGTCCCCTTAGTGGGACGCAGGCCTAGGTAGC
ebv-mir-bart18	EBVWT	+	145931	146049	ebv-mir-bart18-5p	ebv-mir-bart18-5p_-1_3	mature	0.49		145961	145981	TCAAGTTCGCACTTCCTATAC	162514	TTGTTGCCGTTGAAAGACGGGTGTCCTGGCTCAAGTTCGCACTTCCTATACAGTGTTAAAGCCTTGTATCGGAAGTTTGGGCTTCGTCCCAGTGTACTCGATAATGTCGACTGCTGCGA
ebv-mir-bart18	EBVWT	+	145931	146049	ebv-mir-bart18-5p	ebv-mir-bart18-5p	mature	0.39	Y	145961	145982	TCAAGTTCGCACTTCCTATACA	128130	TTGTTGCCGTTGAAAGACGGGTGTCCTGGCTCAAGTTCGCACTTCCTATACAGTGTTAAAGCCTTGTATCGGAAGTTTGGGCTTCGTCCCAGTGTACTCGATAATGTCGACTGCTGCGA
ebv-mir-bart18	EBVWT	+	145931	146049	ebv-mir-bart18-3p	ebv-mir-bart18-3p	mature	0	Y	145997	146018	TATCGGAAGTTTGGGCTTCGTC	2994	TTGTTGCCGTTGAAAGACGGGTGTCCTGGCTCAAGTTCGCACTTCCTATACAGTGTTAAAGCCTTGTATCGGAAGTTTGGGCTTCGTCCCAGTGTACTCGATAATGTCGACTGCTGCGA
ebv-mir-bart19	EBVWT	+	148197	148289	ebv-mir-bart19-5p	ebv-mir-bart19-5p	mature	0.03	Y	148214	148236	ACATTCCCCGCAAACATGACATG	45424	GTATCCGTGTCCTGACAACATTCCCCGCAAACATGACATGGGTTAATTTAAACATGTTTTGTTTGCTTGGGAATGCTCTTAGGGCCTGGAAGC
ebv-mir-bart19	EBVWT	+	148197	148289	ebv-mir-bart19-3p	ebv-mir-bart19-3p	mature	0.18	Y	148253	148273	TTTTGTTTGCTTGGGAATGCT	229733	GTATCCGTGTCCTGACAACATTCCCCGCAAACATGACATGGGTTAATTTAAACATGTTTTGTTTGCTTGGGAATGCTCTTAGGGCCTGGAAGC
ebv-mir-bart19	EBVWT	+	148197	148289	ebv-mir-bart19-3p	ebv-mir-bart19-3p_+1_3	mature	0.45		148253	148274	TTTTGTTTGCTTGGGAATGCTC	583378	GTATCCGTGTCCTGACAACATTCCCCGCAAACATGACATGGGTTAATTTAAACATGTTTTGTTTGCTTGGGAATGCTCTTAGGGCCTGGAAGC
ebv-mir-bart19	EBVWT	+	148197	148289	ebv-mir-bart19-3p	ebv-mir-bart19-3p_+2_3	mature	0.1		148253	148275	TTTTGTTTGCTTGGGAATGCTCT	136860	GTATCCGTGTCCTGACAACATTCCCCGCAAACATGACATGGGTTAATTTAAACATGTTTTGTTTGCTTGGGAATGCTCTTAGGGCCTGGAAGC
ebv-mir-bart2	EBVWT	+	152744	152805	ebv-mir-bart2-5p	ebv-mir-bart2-5p_-1_3	mature	0.41		152746	152766	TATTTTCTGCATTCGCCCTTG	424670	ACTATTTTCTGCATTCGCCCTTGCGTGTCCATTGTTGCAAGGAGCGATTTGGAGAAAATAAA
ebv-mir-bart2	EBVWT	+	152744	152805	ebv-mir-bart2-5p	ebv-mir-bart2-5p	mature	0.51	Y	152746	152767	TATTTTCTGCATTCGCCCTTGC	529781	ACTATTTTCTGCATTCGCCCTTGCGTGTCCATTGTTGCAAGGAGCGATTTGGAGAAAATAAA
ebv-mir-bart2	EBVWT	+	152744	152805	ebv-mir-bart2-3p	ebv-mir-bart2-3p	mature	0	Y	152782	152805	AAGGAGCGATTTGGAGAAAATAAA	2873	ACTATTTTCTGCATTCGCCCTTGCGTGTCCATTGTTGCAAGGAGCGATTTGGAGAAAATAAA
ebv-mir-bart20	EBVWT	+	148318	148416	ebv-mir-bart20-5p	ebv-mir-bart20-5p_-1_3	mature	0.41		148338	148357	TAGCAGGCATGTCTTCATTC	15875	TACAGGCGTAGGGCCTATTGTAGCAGGCATGTCTTCATTCCTGCGTACCGAATGGCATGAAGGCACAGCCTGTTACCATTGGCACCTTTTTTCCATGTA
ebv-mir-bart20	EBVWT	+	148318	148416	ebv-mir-bart20-5p	ebv-mir-bart20-5p	mature	0.13	Y	148338	148358	TAGCAGGCATGTCTTCATTCC	5360	TACAGGCGTAGGGCCTATTGTAGCAGGCATGTCTTCATTCCTGCGTACCGAATGGCATGAAGGCACAGCCTGTTACCATTGGCACCTTTTTTCCATGTA
ebv-mir-bart20	EBVWT	+	148318	148416	ebv-mir-bart20-3p	ebv-mir-bart20-3p_-1_3	mature	0.14		148373	148393	CATGAAGGCACAGCCTGTTAC	5699	TACAGGCGTAGGGCCTATTGTAGCAGGCATGTCTTCATTCCTGCGTACCGAATGGCATGAAGGCACAGCCTGTTACCATTGGCACCTTTTTTCCATGTA
ebv-mir-bart20	EBVWT	+	148318	148416	ebv-mir-bart20-3p	ebv-mir-bart20-3p	mature	0.16	Y	148373	148394	CATGAAGGCACAGCCTGTTACC	6351	TACAGGCGTAGGGCCTATTGTAGCAGGCATGTCTTCATTCCTGCGTACCGAATGGCATGAAGGCACAGCCTGTTACCATTGGCACCTTTTTTCCATGTA
ebv-mir-bart21	EBVWT	+	145502	145577	ebv-mir-bart21-5p	ebv-mir-bart21-5p	mature	0.32	Y	145513	145533	TCACTAGTGAAGGCAACTAAC	53631	GGGCTGGGTATTCACTAGTGAAGGCAACTAACACAGTTAGACGTGCTAGTTGTGCCCACTGGTGTTTATCCGGTCC
ebv-mir-bart21	EBVWT	+	145502	145577	ebv-mir-bart21-5p	ebv-mir-bart21-5p_+1_3	mature	0.1		145513	145534	TCACTAGTGAAGGCAACTAACA	17233	GGGCTGGGTATTCACTAGTGAAGGCAACTAACACAGTTAGACGTGCTAGTTGTGCCCACTGGTGTTTATCCGGTCC
ebv-mir-bart21	EBVWT	+	145502	145577	ebv-mir-bart21-3p	ebv-mir-bart21-3p	mature	0.4	Y	145547	145568	CTAGTTGTGCCCACTGGTGTTT	66500	GGGCTGGGTATTCACTAGTGAAGGCAACTAACACAGTTAGACGTGCTAGTTGTGCCCACTGGTGTTTATCCGGTCC
ebv-mir-bart22	EBVWT	+	147160	147230	ebv-mir-bart22	ebv-mir-bart22	mature	0.81	Y	147202	147224	TTACAAAGTCATGGTCTAGTAGT	540184	GTCACAGGTGCTAGACCCTGGAGTTGAACCAGTACCACTCGGTTACAAAGTCATGGTCTAGTAGTTGTGAC
ebv-mir-bart3	EBVWT	+	139075	139153	ebv-mir-bart3*	ebv-mir-bart3*_+1_5	mature	0.11		139085	139106	AACCTAGTGTTAGTGTTGTGCT	31835	CCTTTGGTGGAACCTAGTGTTAGTGTTGTGCTGTAAATAAGTGTCCAGCGCACCACTAGTCACCAGGTGTCACCGGAGG
ebv-mir-bart3	EBVWT	+	139075	139153	ebv-mir-bart3*	ebv-mir-bart3*_+1_3_+1_5	mature	0.2		139085	139107	AACCTAGTGTTAGTGTTGTGCTG	56473	CCTTTGGTGGAACCTAGTGTTAGTGTTGTGCTGTAAATAAGTGTCCAGCGCACCACTAGTCACCAGGTGTCACCGGAGG
ebv-mir-bart3	EBVWT	+	139075	139153	ebv-mir-bart3*	ebv-mir-bart3*	mature	0.1	Y	139086	139106	ACCTAGTGTTAGTGTTGTGCT	30511	CCTTTGGTGGAACCTAGTGTTAGTGTTGTGCTGTAAATAAGTGTCCAGCGCACCACTAGTCACCAGGTGTCACCGGAGG
ebv-mir-bart3	EBVWT	+	139075	139153	ebv-mir-bart3*	ebv-mir-bart3*_+1_3	mature	0.12		139086	139107	ACCTAGTGTTAGTGTTGTGCTG	34502	CCTTTGGTGGAACCTAGTGTTAGTGTTGTGCTGTAAATAAGTGTCCAGCGCACCACTAGTCACCAGGTGTCACCGGAGG
ebv-mir-bart3	EBVWT	+	139075	139153	ebv-mir-bart3	ebv-mir-bart3	mature	0.19	Y	139123	139144	CGCACCACTAGTCACCAGGTGT	54537	CCTTTGGTGGAACCTAGTGTTAGTGTTGTGCTGTAAATAAGTGTCCAGCGCACCACTAGTCACCAGGTGTCACCGGAGG
ebv-mir-bart4	EBVWT	+	139219	139294	ebv-mir-bart4	ebv-mir-bart4_-1_3	mature	0.24		139227	139247	GACCTGATGCTGCTGGTGTGC	10633	TTTGGTGGGACCTGATGCTGCTGGTGTGCTGTAAATAAGTGCCTAGCACATCACGTAGGCACCAGGTGTCACCAGG
ebv-mir-bart4	EBVWT	+	139219	139294	ebv-mir-bart4	ebv-mir-bart4	mature	0.27	Y	139227	139248	GACCTGATGCTGCTGGTGTGCT	11818	TTTGGTGGGACCTGATGCTGCTGGTGTGCTGTAAATAAGTGCCTAGCACATCACGTAGGCACCAGGTGTCACCAGG
ebv-mir-bart4	EBVWT	+	139219	139294	ebv-mir-bart4	ebv-mir-bart4_+1_3	mature	0.1		139227	139249	GACCTGATGCTGCTGGTGTGCTG	4353	TTTGGTGGGACCTGATGCTGCTGGTGTGCTGTAAATAAGTGCCTAGCACATCACGTAGGCACCAGGTGTCACCAGG
ebv-mir-bart4	EBVWT	+	139219	139294	ebv-mir-bart4*	ebv-mir-bart4*	mature	0.1	Y	139265	139287	CACATCACGTAGGCACCAGGTGT	4485	TTTGGTGGGACCTGATGCTGCTGGTGTGCTGTAAATAAGTGCCTAGCACATCACGTAGGCACCAGGTGTCACCAGG
ebv-mir-bart5	EBVWT	+	139660	139748	ebv-mir-bart5	ebv-mir-bart5_-2_3	mature	0.11		139674	139695	CAAGGTGAATATAGCTGCCCAT	16698	GCTCTGTGGCACCTCAAGGTGAATATAGCTGCCCATCGACGTATCGCTGGAAACCGGTGGGCCGCTGTTCACCTAAAGTGACGCAAGGT
ebv-mir-bart5	EBVWT	+	139660	139748	ebv-mir-bart5	ebv-mir-bart5_-1_3	mature	0.28		139674	139696	CAAGGTGAATATAGCTGCCCATC	39316	GCTCTGTGGCACCTCAAGGTGAATATAGCTGCCCATCGACGTATCGCTGGAAACCGGTGGGCCGCTGTTCACCTAAAGTGACGCAAGGT
ebv-mir-bart5	EBVWT	+	139660	139748	ebv-mir-bart5	ebv-mir-bart5	mature	0.14	Y	139674	139697	CAAGGTGAATATAGCTGCCCATCG	20368	GCTCTGTGGCACCTCAAGGTGAATATAGCTGCCCATCGACGTATCGCTGGAAACCGGTGGGCCGCTGTTCACCTAAAGTGACGCAAGGT
ebv-mir-bart5	EBVWT	+	139660	139748	ebv-mir-bart5*	ebv-mir-bart5*	mature	0	Y	139716	139733	GTGGGCCGCTGTTCACCT	8	GCTCTGTGGCACCTCAAGGTGAATATAGCTGCCCATCGACGTATCGCTGGAAACCGGTGGGCCGCTGTTCACCTAAAGTGACGCAAGGT
ebv-mir-bart6	EBVWT	+	140015	140106	ebv-mir-bart6-5p	ebv-mir-bart6-5p	mature	0.34	Y	140032	140053	TAAGGTTGGTCCAATCCATAGG	108562	TGACCTTGTTGGTACTTTAAGGTTGGTCCAATCCATAGGCTTTTTTTGTGAAAACCCGGGGATCGGACTAGCCTTAGAGTAACTCAAGGCCA
ebv-mir-bart6	EBVWT	+	140015	140106	ebv-mir-bart6-5p	ebv-mir-bart6-5p_+1_3	mature	0.25		140032	140054	TAAGGTTGGTCCAATCCATAGGC	78361	TGACCTTGTTGGTACTTTAAGGTTGGTCCAATCCATAGGCTTTTTTTGTGAAAACCCGGGGATCGGACTAGCCTTAGAGTAACTCAAGGCCA
ebv-mir-bart6	EBVWT	+	140015	140106	ebv-mir-bart6-3p	ebv-mir-bart6-3p	mature	0.2	Y	140071	140092	CGGGGATCGGACTAGCCTTAGA	64612	TGACCTTGTTGGTACTTTAAGGTTGGTCCAATCCATAGGCTTTTTTTGTGAAAACCCGGGGATCGGACTAGCCTTAGAGTAACTCAAGGCCA
ebv-mir-bart7	EBVWT	+	146424	146509	ebv-mir-bart7*	ebv-mir-bart7*_-3_3	mature	0.11		146438	146456	CCTGGACCTTGACTATGAA	57514	TCCAGTGTCCTGATCCTGGACCTTGACTATGAAACAATTCTAAAAAAATGCATCATAGTCCAGTGTCCAGGGACAGTGCACTCGGA
ebv-mir-bart7	EBVWT	+	146424	146509	ebv-mir-bart7*	ebv-mir-bart7*	mature	0.05	Y	146438	146459	CCTGGACCTTGACTATGAAACA	27843	TCCAGTGTCCTGATCCTGGACCTTGACTATGAAACAATTCTAAAAAAATGCATCATAGTCCAGTGTCCAGGGACAGTGCACTCGGA
ebv-mir-bart7	EBVWT	+	146424	146509	ebv-mir-bart7	ebv-mir-bart7_-1_3	mature	0.22		146474	146494	CATCATAGTCCAGTGTCCAGG	109165	TCCAGTGTCCTGATCCTGGACCTTGACTATGAAACAATTCTAAAAAAATGCATCATAGTCCAGTGTCCAGGGACAGTGCACTCGGA
ebv-mir-bart7	EBVWT	+	146424	146509	ebv-mir-bart7	ebv-mir-bart7	mature	0.15	Y	146474	146495	CATCATAGTCCAGTGTCCAGGG	72821	TCCAGTGTCCTGATCCTGGACCTTGACTATGAAACAATTCTAAAAAAATGCATCATAGTCCAGTGTCCAGGGACAGTGCACTCGGA
ebv-mir-bart7	EBVWT	+	146424	146509	ebv-mir-bart7	ebv-mir-bart7_+1_3	mature	0.13		146474	146496	CATCATAGTCCAGTGTCCAGGGA	65090	TCCAGTGTCCTGATCCTGGACCTTGACTATGAAACAATTCTAAAAAAATGCATCATAGTCCAGTGTCCAGGGACAGTGCACTCGGA
ebv-mir-bart8	EBVWT	+	146758	146839	ebv-mir-bart8	ebv-mir-bart8_-2_3	mature	0.1		146771	146790	TACGGTTTCCTAGATTGTAC	69582	TGGGTTCACTGATTACGGTTTCCTAGATTGTACAGATGAACTAGAACTGTCACAATCTATGGGGTCGTAGACAGTGTGCTTA
ebv-mir-bart8	EBVWT	+	146758	146839	ebv-mir-bart8	ebv-mir-bart8	mature	0.65	Y	146771	146792	TACGGTTTCCTAGATTGTACAG	441235	TGGGTTCACTGATTACGGTTTCCTAGATTGTACAGATGAACTAGAACTGTCACAATCTATGGGGTCGTAGACAGTGTGCTTA
ebv-mir-bart8	EBVWT	+	146758	146839	ebv-mir-bart8*	ebv-mir-bart8*	mature	0.05	Y	146806	146828	GTCACAATCTATGGGGTCGTAGA	38783	TGGGTTCACTGATTACGGTTTCCTAGATTGTACAGATGAACTAGAACTGTCACAATCTATGGGGTCGTAGACAGTGTGCTTA
ebv-mir-bart9	EBVWT	+	146945	147031	ebv-mir-bart9*	ebv-mir-bart9*	mature	0	Y	146958	146979	TACTGGACCCTGAATTGGAAAC	8247	CAGCTGTTGTTTGTACTGGACCCTGAATTGGAAACAGTAACTTGGATTCTGTAACACTTCATGGGTCCCGTAGTGACAACTATGCTG
ebv-mir-bart9	EBVWT	+	146945	147031	ebv-mir-bart9	ebv-mir-bart9_-1_3	mature	0.21		146996	147017	TAACACTTCATGGGTCCCGTAG	213429	CAGCTGTTGTTTGTACTGGACCCTGAATTGGAAACAGTAACTTGGATTCTGTAACACTTCATGGGTCCCGTAGTGACAACTATGCTG
ebv-mir-bart9	EBVWT	+	146945	147031	ebv-mir-bart9	ebv-mir-bart9	mature	0.64	Y	146996	147018	TAACACTTCATGGGTCCCGTAGT	632233	CAGCTGTTGTTTGTACTGGACCCTGAATTGGAAACAGTAACTTGGATTCTGTAACACTTCATGGGTCCCGTAGTGACAACTATGCTG
ebv-mir-bhrf1-1	EBVWT	+	41470	41535	ebv-mir-bhrf1-1	ebv-mir-bhrf1-1_-1_3	mature	0.25		41473	41493	TAACCTGATCAGCCCCGGAGT	20	TATTAACCTGATCAGCCCCGGAGTTGCCTGTTTCATCACTAACCCCGGGCCTGAAGAGGTTGACAA
ebv-mir-bhrf1-1	EBVWT	+	41470	41535	ebv-mir-bhrf1-1	ebv-mir-bhrf1-1	mature	0.62	Y	41473	41494	TAACCTGATCAGCCCCGGAGTT	49	TATTAACCTGATCAGCCCCGGAGTTGCCTGTTTCATCACTAACCCCGGGCCTGAAGAGGTTGACAA
ebv-mir-bhrf1-2	EBVWT	+	42847	42911	ebv-mir-bhrf1-2*	ebv-mir-bhrf1-2*	mature	0.02	Y	42852	42873	AAATTCTGTTGCAGCAGATAGC	2	CTTTTAAATTCTGTTGCAGCAGATAGCTGATACCCAATGTTATCTTTTGCGGCAGAAATTGAAAG
ebv-mir-bhrf1-2	EBVWT	+	42847	42911	ebv-mir-bhrf1-2	ebv-mir-bhrf1-2	mature	0.81	Y	42887	42908	TATCTTTTGCGGCAGAAATTGA	77	CTTTTAAATTCTGTTGCAGCAGATAGCTGATACCCAATGTTATCTTTTGCGGCAGAAATTGAAAG
ebv-mir-bhrf1-3	EBVWT	+	42965	43029	ebv-mir-bhrf1-3	ebv-mir-bhrf1-3_-1_3	mature	0.17		42967	42987	TAACGGGAAGTGTGTAAGCAC	14	TCTAACGGGAAGTGTGTAAGCACACACGTAATTTGCAAGCGGTGCTTCACGCTCTTCGTTAAAAT
ebv-mir-bhrf1-3	EBVWT	+	42965	43029	ebv-mir-bhrf1-3	ebv-mir-bhrf1-3	mature	0.14	Y	42967	42988	TAACGGGAAGTGTGTAAGCACA	11	TCTAACGGGAAGTGTGTAAGCACACACGTAATTTGCAAGCGGTGCTTCACGCTCTTCGTTAAAAT
ebv-mir-bhrf1-3	EBVWT	+	42965	43029	ebv-mir-bhrf1-3	ebv-mir-bhrf1-3_+1_3	mature	0.44		42967	42989	TAACGGGAAGTGTGTAAGCACAC	35	TCTAACGGGAAGTGTGTAAGCACACACGTAATTTGCAAGCGGTGCTTCACGCTCTTCGTTAAAAT
ebv-mir-bhrf1-3	EBVWT	+	42965	43029	ebv-mir-bhrf1-3	ebv-mir-bhrf1-3_+2_3	mature	0.11		42967	42990	TAACGGGAAGTGTGTAAGCACACA	9	TCTAACGGGAAGTGTGTAAGCACACACGTAATTTGCAAGCGGTGCTTCACGCTCTTCGTTAAAAT
hsa-let-7a-1	chr9	+	96938238	96938317	hsa-let-7a-1	hsa-let-7a-1_-1_3	mature	0.26		96938243	96938263	TGAGGTAGTAGGTTGTATAGT	109949	TGGGATGAGGTAGTAGGTTGTATAGTTTTAGGGTCACACCCACCACTGGGAGATAACTATACAATCTACTGTCTTTCCTA
hsa-let-7a-1	chr9	+	96938238	96938317	hsa-let-7a-1	hsa-let-7a-1	mature	0.62	Y	96938243	96938264	TGAGGTAGTAGGTTGTATAGTT	259191	TGGGATGAGGTAGTAGGTTGTATAGTTTTAGGGTCACACCCACCACTGGGAGATAACTATACAATCTACTGTCTTTCCTA
hsa-let-7a-1	chr9	+	96938238	96938317	hsa-let-7a-1*	hsa-let-7a-1*	mature	0	Y	96938294	96938314	CTATACAATCTACTGTCTTTC	1885	TGGGATGAGGTAGTAGGTTGTATAGTTTTAGGGTCACACCCACCACTGGGAGATAACTATACAATCTACTGTCTTTCCTA
hsa-let-7a-2	chr11	-	122017229	122017300	hsa-let-7a-2	hsa-let-7a-2	mature	0.63	Y	122017275	122017296	TGAGGTAGTAGGTTGTATAGTT	259191	AGGTTGAGGTAGTAGGTTGTATAGTTTAGAATTACATCAAGGGAGATAACTGTACAGCCTCCTAGCTTTCCT
hsa-let-7a-2	chr11	-	122017229	122017300	hsa-let-7a-2	hsa-let-7a-2_-1_3	mature	0.26		122017276	122017296	TGAGGTAGTAGGTTGTATAGT	109949	AGGTTGAGGTAGTAGGTTGTATAGTTTAGAATTACATCAAGGGAGATAACTGTACAGCCTCCTAGCTTTCCT
hsa-let-7a-3	chr22	+	46508628	46508701	hsa-let-7a-3	hsa-let-7a-3_-1_3	mature	0.26		46508631	46508651	TGAGGTAGTAGGTTGTATAGT	109949	GGGTGAGGTAGTAGGTTGTATAGTTTGGGGCTCTGCCCTGCTATGGGATAACTATACAATCTACTGTCTTTCCT
hsa-let-7a-3	chr22	+	46508628	46508701	hsa-let-7a-3	hsa-let-7a-3	mature	0.62	Y	46508631	46508652	TGAGGTAGTAGGTTGTATAGTT	259191	GGGTGAGGTAGTAGGTTGTATAGTTTGGGGCTCTGCCCTGCTATGGGATAACTATACAATCTACTGTCTTTCCT
hsa-let-7a-3	chr22	+	46508628	46508701	hsa-let-7a-3*	hsa-let-7a-3*	mature	0	Y	46508679	46508699	CTATACAATCTACTGTCTTTC	1885	GGGTGAGGTAGTAGGTTGTATAGTTTGGGGCTCTGCCCTGCTATGGGATAACTATACAATCTACTGTCTTTCCT
hsa-let-7b	chr22	+	46509565	46509647	hsa-let-7b	hsa-let-7b_-1_3	mature	0.11		46509570	46509590	TGAGGTAGTAGGTTGTGTGGT	4107	CGGGGTGAGGTAGTAGGTTGTGTGGTTTCAGGGCAGTGATGTTGCCCCTCGGAAGATAACTATACAACCTACTGCCTTCCCTG
hsa-let-7b	chr22	+	46509565	46509647	hsa-let-7b	hsa-let-7b	mature	0.43	Y	46509570	46509591	TGAGGTAGTAGGTTGTGTGGTT	15267	CGGGGTGAGGTAGTAGGTTGTGTGGTTTCAGGGCAGTGATGTTGCCCCTCGGAAGATAACTATACAACCTACTGCCTTCCCTG
hsa-let-7b	chr22	+	46509565	46509647	hsa-let-7b	hsa-let-7b_+1_3	mature	0.25		46509570	46509592	TGAGGTAGTAGGTTGTGTGGTTT	9048	CGGGGTGAGGTAGTAGGTTGTGTGGTTTCAGGGCAGTGATGTTGCCCCTCGGAAGATAACTATACAACCTACTGCCTTCCCTG
hsa-let-7b	chr22	+	46509565	46509647	hsa-let-7b*	hsa-let-7b*	mature	0.05	Y	46509624	46509645	CTATACAACCTACTGCCTTCCC	1930	CGGGGTGAGGTAGTAGGTTGTGTGGTTTCAGGGCAGTGATGTTGCCCCTCGGAAGATAACTATACAACCTACTGCCTTCCCTG
hsa-let-7c	chr21	+	17912147	17912230	hsa-let-7c	hsa-let-7c_other1	other	0.19		17912157	17912173	TGAGGTAGTAGGTTGTA	348	GCATCCGGGTTGAGGTAGTAGGTTGTATGGTTTAGAGTTACACCCTGGGAGTTAACTGTACAACCTTCTAGCTTTCCTTGGAGC
hsa-let-7c	chr21	+	17912147	17912230	hsa-let-7c	hsa-let-7c_other2	other	0.42		17912157	17912174	TGAGGTAGTAGGTTGTAT	762	GCATCCGGGTTGAGGTAGTAGGTTGTATGGTTTAGAGTTACACCCTGGGAGTTAACTGTACAACCTTCTAGCTTTCCTTGGAGC
hsa-let-7c	chr21	+	17912147	17912230	hsa-let-7c	hsa-let-7c	mature	0.16	Y	17912157	17912178	TGAGGTAGTAGGTTGTATGGTT	301	GCATCCGGGTTGAGGTAGTAGGTTGTATGGTTTAGAGTTACACCCTGGGAGTTAACTGTACAACCTTCTAGCTTTCCTTGGAGC
hsa-let-7d	chr9	+	96941115	96941201	hsa-let-7d	hsa-let-7d_-1_3	mature	0.28		96941122	96941142	AGAGGTAGTAGGTTGCATAGT	30915	CCTAGGAAGAGGTAGTAGGTTGCATAGTTTTAGGGCAGGGATTTTGCCCACAAGGAGGTAACTATACGACCTGCTGCCTTTCTTAGG
hsa-let-7d	chr9	+	96941115	96941201	hsa-let-7d	hsa-let-7d	mature	0.51	Y	96941122	96941143	AGAGGTAGTAGGTTGCATAGTT	55925	CCTAGGAAGAGGTAGTAGGTTGCATAGTTTTAGGGCAGGGATTTTGCCCACAAGGAGGTAACTATACGACCTGCTGCCTTTCTTAGG
hsa-let-7d	chr9	+	96941115	96941201	hsa-let-7d*	hsa-let-7d*	mature	0.06	Y	96941176	96941197	CTATACGACCTGCTGCCTTTCT	6910	CCTAGGAAGAGGTAGTAGGTTGCATAGTTTTAGGGCAGGGATTTTGCCCACAAGGAGGTAACTATACGACCTGCTGCCTTTCTTAGG
hsa-let-7e	chr19	+	52196038	52196116	hsa-let-7e	hsa-let-7e_-1_3	mature	0.33		52196045	52196065	TGAGGTAGGAGGTTGTATAGT	9851	CCCGGGCTGAGGTAGGAGGTTGTATAGTTGAGGAGGACACCCAAGGAGATCACTATACGGCCTCCTAGCTTTCCCCAGG
hsa-let-7e	chr19	+	52196038	52196116	hsa-let-7e	hsa-let-7e	mature	0.48	Y	52196045	52196066	TGAGGTAGGAGGTTGTATAGTT	14310	CCCGGGCTGAGGTAGGAGGTTGTATAGTTGAGGAGGACACCCAAGGAGATCACTATACGGCCTCCTAGCTTTCCCCAGG
hsa-let-7e	chr19	+	52196038	52196116	hsa-let-7e	hsa-let-7e_+1_3	mature	0.11		52196045	52196067	TGAGGTAGGAGGTTGTATAGTTG	3271	CCCGGGCTGAGGTAGGAGGTTGTATAGTTGAGGAGGACACCCAAGGAGATCACTATACGGCCTCCTAGCTTTCCCCAGG
hsa-let-7e	chr19	+	52196038	52196116	hsa-let-7e*	hsa-let-7e*	mature	0.01	Y	52196090	52196111	CTATACGGCCTCCTAGCTTTCC	309	CCCGGGCTGAGGTAGGAGGTTGTATAGTTGAGGAGGACACCCAAGGAGATCACTATACGGCCTCCTAGCTTTCCCCAGG
hsa-let-7f-1	chr9	+	96938628	96938714	hsa-let-7f-1	hsa-let-7f-1_-1_3	mature	0.24		96938634	96938654	TGAGGTAGTAGATTGTATAGT	202982	TCAGAGTGAGGTAGTAGATTGTATAGTTGTGGGGTAGTGATTTTACCCTGTTCAGGAGATAACTATACAATCTATTGCCTTCCCTGA
hsa-let-7f-1	chr9	+	96938628	96938714	hsa-let-7f-1	hsa-let-7f-1	mature	0.69	Y	96938634	96938655	TGAGGTAGTAGATTGTATAGTT	575404	TCAGAGTGAGGTAGTAGATTGTATAGTTGTGGGGTAGTGATTTTACCCTGTTCAGGAGATAACTATACAATCTATTGCCTTCCCTGA
hsa-let-7f-2	chrX	-	53584152	53584234	hsa-let-7f-2	hsa-let-7f-2	mature	0.68	Y	53584206	53584227	TGAGGTAGTAGATTGTATAGTT	575404	TGTGGGATGAGGTAGTAGATTGTATAGTTTTAGGGTCATACCCCATCTTGGAGATAACTATACAGTCTACTGTCTTTCCCACG
hsa-let-7f-2	chrX	-	53584152	53584234	hsa-let-7f-2	hsa-let-7f-2_-1_3	mature	0.24		53584207	53584227	TGAGGTAGTAGATTGTATAGT	202982	TGTGGGATGAGGTAGTAGATTGTATAGTTTTAGGGTCATACCCCATCTTGGAGATAACTATACAGTCTACTGTCTTTCCCACG
hsa-let-7g	chr3	-	52302293	52302376	hsa-let-7g*	hsa-let-7g*	mature	0	Y	52302295	52302315	CTGTACAGGCCACTGCCTTGC	67	AGGCTGAGGTAGTAGTTTGTACAGTTTGAGGGTCTATGATACCACCCGGTACAGGAGATAACTGTACAGGCCACTGCCTTGCCA
hsa-let-7g	chr3	-	52302293	52302376	hsa-let-7g	hsa-let-7g	mature	0.66	Y	52302351	52302372	TGAGGTAGTAGTTTGTACAGTT	156213	AGGCTGAGGTAGTAGTTTGTACAGTTTGAGGGTCTATGATACCACCCGGTACAGGAGATAACTGTACAGGCCACTGCCTTGCCA
hsa-let-7g	chr3	-	52302293	52302376	hsa-let-7g	hsa-let-7g_-1_3	mature	0.23		52302352	52302372	TGAGGTAGTAGTTTGTACAGT	56062	AGGCTGAGGTAGTAGTTTGTACAGTTTGAGGGTCTATGATACCACCCGGTACAGGAGATAACTGTACAGGCCACTGCCTTGCCA
hsa-let-7i	chr12	+	62997465	62997548	hsa-let-7i	hsa-let-7i_-1_3	mature	0.17		62997470	62997490	TGAGGTAGTAGTTTGTGCTGT	8102	CTGGCTGAGGTAGTAGTTTGTGCTGTTGGTCGGGTTGTGACATTGCCCGCTGTGGAGATAACTGCGCAAGCTACTGCCTTGCTA
hsa-let-7i	chr12	+	62997465	62997548	hsa-let-7i	hsa-let-7i	mature	0.53	Y	62997470	62997491	TGAGGTAGTAGTTTGTGCTGTT	25069	CTGGCTGAGGTAGTAGTTTGTGCTGTTGGTCGGGTTGTGACATTGCCCGCTGTGGAGATAACTGCGCAAGCTACTGCCTTGCTA
hsa-let-7i	chr12	+	62997465	62997548	hsa-let-7i	hsa-let-7i_+1_3	mature	0.23		62997470	62997492	TGAGGTAGTAGTTTGTGCTGTTG	11200	CTGGCTGAGGTAGTAGTTTGTGCTGTTGGTCGGGTTGTGACATTGCCCGCTGTGGAGATAACTGCGCAAGCTACTGCCTTGCTA
hsa-let-7i	chr12	+	62997465	62997548	hsa-let-7i*	hsa-let-7i*	mature	0	Y	62997526	62997547	CTGCGCAAGCTACTGCCTTGCT	177	CTGGCTGAGGTAGTAGTTTGTGCTGTTGGTCGGGTTGTGACATTGCCCGCTGTGGAGATAACTGCGCAAGCTACTGCCTTGCTA
hsa-mir-1-1	chr20	+	61151512	61151582	hsa-mir-1-1	hsa-mir-1-1	mature	0.91	Y	61151557	61151578	TGGAATGTAAAGAAGTATGTAT	105	TGGGAAACATACTTCTTTATATGCCCATATGGACCTGCTAAGCTATGGAATGTAAAGAAGTATGTATCTCA
hsa-mir-1-2	chr18	-	19408964	19409048	hsa-mir-1-2	hsa-mir-1-2	mature	0.82	Y	19408975	19408996	TGGAATGTAAAGAAGTATGTAT	105	ACCTACTCAGAGTACATACTTCTTTATGTACCCATATGAACATACAATGCTATGGAATGTAAAGAAGTATGTATTTTTGGTAGGC
hsa-mir-100	chr11	-	122022936	122023015	hsa-mir-100	hsa-mir-100	mature	0.28	Y	122022982	122023003	AACCCGTAGATCCGAACTTGTG	2	CCTGTTGCCACAAACCCGTAGATCCGAACTTGTGGTATTAGTCCGCACAAGCTTGTATCTATAGGTATGTGTCTGTTAGG
hsa-mir-100	chr11	-	122022936	122023015	hsa-mir-100	hsa-mir-100_-1_3	mature	0.42		122022983	122023003	AACCCGTAGATCCGAACTTGT	3	CCTGTTGCCACAAACCCGTAGATCCGAACTTGTGGTATTAGTCCGCACAAGCTTGTATCTATAGGTATGTGTCTGTTAGG
hsa-mir-100	chr11	-	122022936	122023015	hsa-mir-100	hsa-mir-100_-2_3	mature	0.28		122022984	122023003	AACCCGTAGATCCGAACTTG	2	CCTGTTGCCACAAACCCGTAGATCCGAACTTGTGGTATTAGTCCGCACAAGCTTGTATCTATAGGTATGTGTCTGTTAGG
hsa-mir-101-1	chr1	-	65524116	65524190	hsa-mir-101-1	hsa-mir-101-1_+1_3	mature	0.45		65524123	65524144	TACAGTACTGTGATAACTGAAG	53099	TGCCCTGGCTCAGTTATCACAGTGCTGATGCTGTCTATTCTAAAGGTACAGTACTGTGATAACTGAAGGATGGCA
hsa-mir-101-1	chr1	-	65524116	65524190	hsa-mir-101-1	hsa-mir-101-1	mature	0.1	Y	65524124	65524144	TACAGTACTGTGATAACTGAA	12617	TGCCCTGGCTCAGTTATCACAGTGCTGATGCTGTCTATTCTAAAGGTACAGTACTGTGATAACTGAAGGATGGCA
hsa-mir-101-1	chr1	-	65524116	65524190	hsa-mir-101-1	hsa-mir-101-1_-1_3	mature	0.19		65524125	65524144	TACAGTACTGTGATAACTGA	22152	TGCCCTGGCTCAGTTATCACAGTGCTGATGCTGTCTATTCTAAAGGTACAGTACTGTGATAACTGAAGGATGGCA
hsa-mir-101-1	chr1	-	65524116	65524190	hsa-mir-101-1*	hsa-mir-101-1*	mature	0	Y	65524159	65524180	CAGTTATCACAGTGCTGATGCT	11	TGCCCTGGCTCAGTTATCACAGTGCTGATGCTGTCTATTCTAAAGGTACAGTACTGTGATAACTGAAGGATGGCA
hsa-mir-101-2	chr9	+	4850296	4850374	hsa-mir-101-2	hsa-mir-101-2_-1_3	mature	0.18		4850344	4850363	TACAGTACTGTGATAACTGA	22152	ACTGTCCTTTTTCGGTTATCATGGTACCGATGCTGTATATCTGAAAGGTACAGTACTGTGATAACTGAAGAATGGTGGT
hsa-mir-101-2	chr9	+	4850296	4850374	hsa-mir-101-2	hsa-mir-101-2	mature	0.1	Y	4850344	4850364	TACAGTACTGTGATAACTGAA	12617	ACTGTCCTTTTTCGGTTATCATGGTACCGATGCTGTATATCTGAAAGGTACAGTACTGTGATAACTGAAGAATGGTGGT
hsa-mir-101-2	chr9	+	4850296	4850374	hsa-mir-101-2	hsa-mir-101-2_+1_3	mature	0.45		4850344	4850365	TACAGTACTGTGATAACTGAAG	53099	ACTGTCCTTTTTCGGTTATCATGGTACCGATGCTGTATATCTGAAAGGTACAGTACTGTGATAACTGAAGAATGGTGGT
hsa-mir-103-1	chr5	-	167987900	167987977	hsa-mir-103-1	hsa-mir-103-1	mature	0.5	Y	167987908	167987930	AGCAGCATTGTACAGGGCTATGA	25069	TACTGCCCTCGGCTTCTTTACAGTGCTGCCTTGTTGCATATGGATCAAGCAGCATTGTACAGGGCTATGAAGGCATTG
hsa-mir-103-1	chr5	-	167987900	167987977	hsa-mir-103-1	hsa-mir-103-1_-2_3	mature	0.28		167987910	167987930	AGCAGCATTGTACAGGGCTAT	14063	TACTGCCCTCGGCTTCTTTACAGTGCTGCCTTGTTGCATATGGATCAAGCAGCATTGTACAGGGCTATGAAGGCATTG
hsa-mir-103-2	chr20	+	3898140	3898217	hsa-mir-103-2	hsa-mir-103-2_-2_3	mature	0.27		3898187	3898207	AGCAGCATTGTACAGGGCTAT	14063	TTGTGCTTTCAGCTTCTTTACAGTGCTGCCTTGTAGCATTCAGGTCAAGCAGCATTGTACAGGGCTATGAAAGAACCA
hsa-mir-103-2	chr20	+	3898140	3898217	hsa-mir-103-2	hsa-mir-103-2	mature	0.49	Y	3898187	3898209	AGCAGCATTGTACAGGGCTATGA	25069	TTGTGCTTTCAGCTTCTTTACAGTGCTGCCTTGTAGCATTCAGGTCAAGCAGCATTGTACAGGGCTATGAAAGAACCA
hsa-mir-106a	chrX	-	133304227	133304307	hsa-mir-106a	hsa-mir-106a_-1_5	mature	0.58		133304273	133304294	AAAGTGCTTACAGTGCAGGTAG	478	CCTTGGCCATGTAAAAGTGCTTACAGTGCAGGTAGCTTTTTGAGATCTACTGCAATGTAAGCACTTCTTACATTACCATGG
hsa-mir-106a	chrX	-	133304227	133304307	hsa-mir-106a	hsa-mir-106a_Edit_0	matureEdit	0.01	Y	133304273	133304295	GAAAGTGCTTACAGTGCAGGTAG	13	CCTTGGCCATGTAAAAGTGCTTACAGTGCAGGTAGCTTTTTGAGATCTACTGCAATGTAAGCACTTCTTACATTACCATGG
hsa-mir-106a	chrX	-	133304227	133304307	hsa-mir-106a	hsa-mir-106a	mature	0.09	Y	133304273	133304295	AAAAGTGCTTACAGTGCAGGTAG	80	CCTTGGCCATGTAAAAGTGCTTACAGTGCAGGTAGCTTTTTGAGATCTACTGCAATGTAAGCACTTCTTACATTACCATGG
hsa-mir-106b	chr7	-	99691615	99691696	hsa-mir-106b*	hsa-mir-106b*	mature	0.01	Y	99691624	99691645	CCGCACTGTGGGTACTTGCTGC	1330	CCTGCCGGGGCTAAAGTGCTGACAGTGCAGATAGTGGTCCTCTCCGTGCTACCGCACTGTGGGTACTTGCTGCTCCAGCAGG
hsa-mir-106b	chr7	-	99691615	99691696	hsa-mir-106b	hsa-mir-106b_+1_3	mature	0.23		99691664	99691685	TAAAGTGCTGACAGTGCAGATA	19011	CCTGCCGGGGCTAAAGTGCTGACAGTGCAGATAGTGGTCCTCTCCGTGCTACCGCACTGTGGGTACTTGCTGCTCCAGCAGG
hsa-mir-106b	chr7	-	99691615	99691696	hsa-mir-106b	hsa-mir-106b	mature	0.42	Y	99691665	99691685	TAAAGTGCTGACAGTGCAGAT	34158	CCTGCCGGGGCTAAAGTGCTGACAGTGCAGATAGTGGTCCTCTCCGTGCTACCGCACTGTGGGTACTTGCTGCTCCAGCAGG
hsa-mir-107	chr10	-	91352503	91352583	hsa-mir-107	hsa-mir-107	mature	0.06	Y	91352512	91352534	AGCAGCATTGTACAGGGCTATCA	1239	CTCTCTGCTTTCAGCTTCTTTACAGTGTTGCCTTGTGGCATGGAGTTCAAGCAGCATTGTACAGGGCTATCAAAGCACAGA
hsa-mir-107	chr10	-	91352503	91352583	hsa-mir-107	hsa-mir-107_-1_3	mature	0.19		91352513	91352534	AGCAGCATTGTACAGGGCTATC	3895	CTCTCTGCTTTCAGCTTCTTTACAGTGTTGCCTTGTGGCATGGAGTTCAAGCAGCATTGTACAGGGCTATCAAAGCACAGA
hsa-mir-107	chr10	-	91352503	91352583	hsa-mir-107	hsa-mir-107_-2_3	mature	0.68		91352514	91352534	AGCAGCATTGTACAGGGCTAT	14063	CTCTCTGCTTTCAGCTTCTTTACAGTGTTGCCTTGTGGCATGGAGTTCAAGCAGCATTGTACAGGGCTATCAAAGCACAGA
hsa-mir-10a	chr17	-	46657199	46657308	hsa-mir-10a*	hsa-mir-10a*	mature	0	Y	46657225	46657246	CAAATTCGTATCTAGGGGAATA	3	GATCTGTCTGTCTTCTGTATATACCCTGTAGATCCGAATTTGTGTAAGGAATTTTGTGGTCACAAATTCGTATCTAGGGGAATATGTAGTTGACATAAACACTCCGCTCT
hsa-mir-10a	chr17	-	46657199	46657308	hsa-mir-10a	hsa-mir-10a	mature	0.2	Y	46657265	46657287	TACCCTGTAGATCCGAATTTGTG	1174	GATCTGTCTGTCTTCTGTATATACCCTGTAGATCCGAATTTGTGTAAGGAATTTTGTGGTCACAAATTCGTATCTAGGGGAATATGTAGTTGACATAAACACTCCGCTCT
hsa-mir-10a	chr17	-	46657199	46657308	hsa-mir-10a	hsa-mir-10a_-1_3	mature	0.48		46657266	46657287	TACCCTGTAGATCCGAATTTGT	2755	GATCTGTCTGTCTTCTGTATATACCCTGTAGATCCGAATTTGTGTAAGGAATTTTGTGGTCACAAATTCGTATCTAGGGGAATATGTAGTTGACATAAACACTCCGCTCT
hsa-mir-10b	chr2	+	177015030	177015139	hsa-mir-10b	hsa-mir-10b_-1_3	mature	0.68		177015056	177015077	TACCCTGTAGAACCGAATTTGT	13	CCAGAGGTTGTAACGTTGTCTATATATACCCTGTAGAACCGAATTTGTGTGGTATCCGTATAGTCACAGATTCGATTCTAGGGGAATATATGGTCGATGCAAAAACTTCA
hsa-mir-10b	chr2	+	177015030	177015139	hsa-mir-10b	hsa-mir-10b	mature	0.26	Y	177015056	177015078	TACCCTGTAGAACCGAATTTGTG	5	CCAGAGGTTGTAACGTTGTCTATATATACCCTGTAGAACCGAATTTGTGTGGTATCCGTATAGTCACAGATTCGATTCTAGGGGAATATATGGTCGATGCAAAAACTTCA
hsa-mir-1179	chr15	+	89151337	89151427	hsa-mir-1179	hsa-mir-1179	mature	0.02	Y	89151351	89151371	AAGCATTCTTTCATTGGTTGG	1	GGCTGGAAAGGAAGAAGCATTCTTTCATTGGTTGGTGTGTATTGCCTTGTCAACCAATAAGAGGATGCCATTTATCCTTTTCTGACTAGCT
hsa-mir-1179	chr15	+	89151337	89151427	hsa-mir-1179	hsa-mir-1179_+1_3	mature	0.78		89151351	89151372	AAGCATTCTTTCATTGGTTGGT	39	GGCTGGAAAGGAAGAAGCATTCTTTCATTGGTTGGTGTGTATTGCCTTGTCAACCAATAAGAGGATGCCATTTATCCTTTTCTGACTAGCT
hsa-mir-1180	chr17	-	19247818	19247886	hsa-mir-1180	hsa-mir-1180	mature	0.49	Y	19247825	19247846	TTTCCGGCTCGCGTGGGTGTGT	99	GCTGCTGGACCCACCCGGCCGGGAATAGTGCTCCTGGTTGTTTCCGGCTCGCGTGGGTGTGTCGGCGGC
hsa-mir-1180	chr17	-	19247818	19247886	hsa-mir-1180	hsa-mir-1180_-2_3	mature	0.34		19247827	19247846	TTTCCGGCTCGCGTGGGTGT	69	GCTGCTGGACCCACCCGGCCGGGAATAGTGCTCCTGGTTGTTTCCGGCTCGCGTGGGTGTGTCGGCGGC
hsa-mir-1185-1	chr14	+	101509313	101509398	hsa-mir-1185-1	hsa-mir-1185-1	mature	0.28	Y	101509327	101509347	AGAGGATACCCTTTGTATGTT	2	TTTGGTACTTGAAGAGAGGATACCCTTTGTATGTTCACTTGATTAATGGCGAATATACAGGGGGAGACTCTTATTTGCGTATCAAA
hsa-mir-1185-1	chr14	+	101509313	101509398	hsa-mir-1185-1	hsa-mir-1185-1_+1_3	mature	0.57		101509327	101509348	AGAGGATACCCTTTGTATGTTC	4	TTTGGTACTTGAAGAGAGGATACCCTTTGTATGTTCACTTGATTAATGGCGAATATACAGGGGGAGACTCTTATTTGCGTATCAAA
hsa-mir-1185-1	chr14	+	101509313	101509398	hsa-mir-1185-1-star	hsa-mir-1185-1-star_+1_3_+1_5	star	0.14		101509365	101509386	ATATACAGGGGGAGACTCTTAT	1	TTTGGTACTTGAAGAGAGGATACCCTTTGTATGTTCACTTGATTAATGGCGAATATACAGGGGGAGACTCTTATTTGCGTATCAAA
hsa-mir-1185-2	chr14	+	101510534	101510619	hsa-mir-1185-2	hsa-mir-1185-2	mature	0.33	Y	101510548	101510568	AGAGGATACCCTTTGTATGTT	2	TTTGGTACTTAAAGAGAGGATACCCTTTGTATGTTCACTTGATTAATGGCGAATATACAGGGGGAGACTCTCATTTGCGTATCAAA
hsa-mir-1185-2	chr14	+	101510534	101510619	hsa-mir-1185-2	hsa-mir-1185-2_+1_3	mature	0.66		101510548	101510569	AGAGGATACCCTTTGTATGTTC	4	TTTGGTACTTAAAGAGAGGATACCCTTTGTATGTTCACTTGATTAATGGCGAATATACAGGGGGAGACTCTCATTTGCGTATCAAA
hsa-mir-122	chr18	+	56118305	56118389	hsa-mir-122	hsa-mir-122_-2_3	mature	0.23		56118319	56118338	TGGAGTGTGACAATGGTGTT	3	CCTTAGCAGAGCTGTGGAGTGTGACAATGGTGTTTGTGTCTAAACTATCAAACGCCATTATCACACTAAATAGCTACTGCTAGGC
hsa-mir-122	chr18	+	56118305	56118389	hsa-mir-122	hsa-mir-122_-1_3	mature	0.38		56118319	56118339	TGGAGTGTGACAATGGTGTTT	5	CCTTAGCAGAGCTGTGGAGTGTGACAATGGTGTTTGTGTCTAAACTATCAAACGCCATTATCACACTAAATAGCTACTGCTAGGC
hsa-mir-122	chr18	+	56118305	56118389	hsa-mir-122	hsa-mir-122	mature	0.3	Y	56118319	56118340	TGGAGTGTGACAATGGTGTTTG	4	CCTTAGCAGAGCTGTGGAGTGTGACAATGGTGTTTGTGTCTAAACTATCAAACGCCATTATCACACTAAATAGCTACTGCTAGGC
hsa-mir-1224	chr3	+	183959192	183959276	hsa-mir-1224-5p	hsa-mir-1224-5p	mature	0.08	Y	183959192	183959210	GTGAGGACTCGGGAGGTGG	2	GTGAGGACTCGGGAGGTGGAGGGTGGTGCCGCCGGGGCCGGGCGCTGTTTCAGCTCGCTTCTCCCCCCACCTCCTCTCTCCTCAG
hsa-mir-1224	chr3	+	183959192	183959276	hsa-mir-1224-5p	hsa-mir-1224-5p_+1_3	mature	0.12		183959192	183959211	GTGAGGACTCGGGAGGTGGA	3	GTGAGGACTCGGGAGGTGGAGGGTGGTGCCGCCGGGGCCGGGCGCTGTTTCAGCTCGCTTCTCCCCCCACCTCCTCTCTCCTCAG
hsa-mir-1224	chr3	+	183959192	183959276	hsa-mir-1224-5p	hsa-mir-1224-5p_+2_3	mature	0.29		183959192	183959212	GTGAGGACTCGGGAGGTGGAG	7	GTGAGGACTCGGGAGGTGGAGGGTGGTGCCGCCGGGGCCGGGCGCTGTTTCAGCTCGCTTCTCCCCCCACCTCCTCTCTCCTCAG
hsa-mir-1224	chr3	+	183959192	183959276	hsa-mir-1224	hsa-mir-1224_other1	other	0.29		183959192	183959213	GTGAGGACTCGGGAGGTGGAGG	7	GTGAGGACTCGGGAGGTGGAGGGTGGTGCCGCCGGGGCCGGGCGCTGTTTCAGCTCGCTTCTCCCCCCACCTCCTCTCTCCTCAG
hsa-mir-1226	chr3	+	47891044	47891118	hsa-mir-1226*	hsa-mir-1226*_-1_3_-1_5	mature	0.12		47891045	47891068	TGAGGGCATGCAGGCCTGGATGGG	2	GTGAGGGCATGCAGGCCTGGATGGGGCAGCTGGGATGGTCCAAAAGGGTGGCCTCACCAGCCCTGTGTTCCCTAG
hsa-mir-1226	chr3	+	47891044	47891118	hsa-mir-1226	hsa-mir-1226_-2_3	mature	0.12		47891097	47891116	TCACCAGCCCTGTGTTCCCT	2	GTGAGGGCATGCAGGCCTGGATGGGGCAGCTGGGATGGTCCAAAAGGGTGGCCTCACCAGCCCTGTGTTCCCTAG
hsa-mir-1226	chr3	+	47891044	47891118	hsa-mir-1226	hsa-mir-1226	mature	0.68	Y	47891097	47891118	TCACCAGCCCTGTGTTCCCTAG	11	GTGAGGGCATGCAGGCCTGGATGGGGCAGCTGGGATGGTCCAAAAGGGTGGCCTCACCAGCCCTGTGTTCCCTAG
hsa-mir-1228	chr12	+	57588286	57588358	hsa-mir-1228	hsa-mir-1228_+1_3	mature	1		57588337	57588357	TCACACCTGCCTCGCCCCCCA	7	GTGGGCGGGGGCAGGTGTGTGGTGGGTGGTGGCCTGCGGTGAGCAGGGCCCTCACACCTGCCTCGCCCCCCAG
hsa-mir-1229	chr5	-	179225277	179225345	hsa-mir-1229	hsa-mir-1229_-1_3_-1_5	mature	0.37		179225278	179225298	TCTCACCACTGCCCTCCCACA	3	GTGGGTAGGGTTTGGGGGAGAGCGTGGGCTGGGGTTCAGGGACACCCTCTCACCACTGCCCTCCCACAG
hsa-mir-1229	chr5	-	179225277	179225345	hsa-mir-1229	hsa-mir-1229_-1_3_+1_5	mature	0.37		179225278	179225300	CCTCTCACCACTGCCCTCCCACA	3	GTGGGTAGGGTTTGGGGGAGAGCGTGGGCTGGGGTTCAGGGACACCCTCTCACCACTGCCCTCCCACAG
hsa-mir-1237	chr11	+	64136073	64136174	hsa-mir-1237	hsa-mir-1237	mature	0.63	Y	64136154	64136174	TCCTTCTGCTCCGTCCCCCAG	7	GTGGGAGGGCCCAGGCGCGGGCAGGGGTGGGGGTGGCAGAGCGCTGTCCCGGGGGCGGGGCCGAAGCGCGGCGACCGTAACTCCTTCTGCTCCGTCCCCCAG
hsa-mir-1237	chr11	+	64136073	64136174	hsa-mir-1237	hsa-mir-1237_-1_5	mature	0.18		64136155	64136174	CCTTCTGCTCCGTCCCCCAG	2	GTGGGAGGGCCCAGGCGCGGGCAGGGGTGGGGGTGGCAGAGCGCTGTCCCGGGGGCGGGGCCGAAGCGCGGCGACCGTAACTCCTTCTGCTCCGTCCCCCAG
hsa-mir-1243	chr4	+	114028018	114028110	hsa-mir-1243	hsa-mir-1243_-1_3_+1_5	mature	0.6		114028021	114028042	AAACTGGATCAATTATAGGAGT	6	CTAAAACTGGATCAATTATAGGAGTGAAATAAAGGTCCATCTCCTGCCTATTTATTACTTTGCTTTGGTAATAAATCTATTTTTAAAAGAACC
hsa-mir-1243	chr4	+	114028018	114028110	hsa-mir-1243	hsa-mir-1243_-1_3	mature	0.1		114028022	114028042	AACTGGATCAATTATAGGAGT	1	CTAAAACTGGATCAATTATAGGAGTGAAATAAAGGTCCATCTCCTGCCTATTTATTACTTTGCTTTGGTAATAAATCTATTTTTAAAAGAACC
hsa-mir-1243	chr4	+	114028018	114028110	hsa-mir-1243	hsa-mir-1243_-1_3_-1_5	mature	0.1		114028023	114028042	ACTGGATCAATTATAGGAGT	1	CTAAAACTGGATCAATTATAGGAGTGAAATAAAGGTCCATCTCCTGCCTATTTATTACTTTGCTTTGGTAATAAATCTATTTTTAAAAGAACC
hsa-mir-1243	chr4	+	114028018	114028110	hsa-mir-1243	hsa-mir-1243_+1_3_-1_5	mature	0.2		114028023	114028044	ACTGGATCAATTATAGGAGTGA	2	CTAAAACTGGATCAATTATAGGAGTGAAATAAAGGTCCATCTCCTGCCTATTTATTACTTTGCTTTGGTAATAAATCTATTTTTAAAAGAACC
hsa-mir-1246	chr2	-	177465707	177465779	hsa-mir-1246	hsa-mir-1246_-2_5	mature	0.24		177465751	177465767	TGGATTTTTGGAGCAGG	39	TGTATCCTTGAATGGATTTTTGGAGCAGGAGTGGACACCTGACCCAAAGGAAATCAATCCATAGGCTAGCAAT
hsa-mir-1246	chr2	-	177465707	177465779	hsa-mir-1246	hsa-mir-1246_-1_5	mature	0.39		177465751	177465768	ATGGATTTTTGGAGCAGG	64	TGTATCCTTGAATGGATTTTTGGAGCAGGAGTGGACACCTGACCCAAAGGAAATCAATCCATAGGCTAGCAAT
hsa-mir-1246	chr2	-	177465707	177465779	hsa-mir-1246	hsa-mir-1246	mature	0.21	Y	177465751	177465769	AATGGATTTTTGGAGCAGG	35	TGTATCCTTGAATGGATTTTTGGAGCAGGAGTGGACACCTGACCCAAAGGAAATCAATCCATAGGCTAGCAAT
hsa-mir-1247	chr14	-	102026623	102026758	hsa-mir-1247	hsa-mir-1247_+1_3	mature	0.49		102026697	102026719	ACCCGTCCCGTTCGTCCCCGGAC	434	CCGCTTGCCTCGCCCAGCGCAGCCCCGGCCGCTGGGCGCACCCGTCCCGTTCGTCCCCGGACGTTGCTCTCTACCCCGGGAACGTCGAGACTGGAGCGCCCGAACTGAGCCACCTTCGCGGACCCCGAGAGCGGCG
hsa-mir-1247	chr14	-	102026623	102026758	hsa-mir-1247	hsa-mir-1247	mature	0.19	Y	102026698	102026719	ACCCGTCCCGTTCGTCCCCGGA	168	CCGCTTGCCTCGCCCAGCGCAGCCCCGGCCGCTGGGCGCACCCGTCCCGTTCGTCCCCGGACGTTGCTCTCTACCCCGGGAACGTCGAGACTGGAGCGCCCGAACTGAGCCACCTTCGCGGACCCCGAGAGCGGCG
hsa-mir-1247	chr14	-	102026623	102026758	hsa-mir-1247	hsa-mir-1247_-1_3	mature	0.11		102026699	102026719	ACCCGTCCCGTTCGTCCCCGG	101	CCGCTTGCCTCGCCCAGCGCAGCCCCGGCCGCTGGGCGCACCCGTCCCGTTCGTCCCCGGACGTTGCTCTCTACCCCGGGAACGTCGAGACTGGAGCGCCCGAACTGAGCCACCTTCGCGGACCCCGAGAGCGGCG
hsa-mir-1248	chr3	+	186504460	186504565	hsa-mir-1248	hsa-mir-1248_-2_3	mature	0.16		186504463	186504487	ACCTTCTTGTATAAGCACTGTGCTA	1	TTTACCTTCTTGTATAAGCACTGTGCTAAAATTGCAGACACTAGGACCATGTCTTGGTTTTTGCAATAATGCTAGCAGAGTACACACAAGAAGAAAAGTAACAGCA
hsa-mir-1248	chr3	+	186504460	186504565	hsa-mir-1248	hsa-mir-1248_+2_3	mature	0.16		186504463	186504491	ACCTTCTTGTATAAGCACTGTGCTAAAAT	1	TTTACCTTCTTGTATAAGCACTGTGCTAAAATTGCAGACACTAGGACCATGTCTTGGTTTTTGCAATAATGCTAGCAGAGTACACACAAGAAGAAAAGTAACAGCA
hsa-mir-1249	chr22	-	45596834	45596899	hsa-mir-1249	hsa-mir-1249	mature	0.37	Y	45596838	45596859	ACGCCCTTCCCCCCCTTCTTCA	106	GGGAGGAGGGAGGAGATGGGCCAAGTTCCCTCTGGCTGGAACGCCCTTCCCCCCCTTCTTCACCTG
hsa-mir-1249	chr22	-	45596834	45596899	hsa-mir-1249	hsa-mir-1249_-1_3	mature	0.24		45596839	45596859	ACGCCCTTCCCCCCCTTCTTC	69	GGGAGGAGGGAGGAGATGGGCCAAGTTCCCTCTGGCTGGAACGCCCTTCCCCCCCTTCTTCACCTG
hsa-mir-1249	chr22	-	45596834	45596899	hsa-mir-1249	hsa-mir-1249_-2_3	mature	0.16		45596840	45596859	ACGCCCTTCCCCCCCTTCTT	46	GGGAGGAGGGAGGAGATGGGCCAAGTTCCCTCTGGCTGGAACGCCCTTCCCCCCCTTCTTCACCTG
hsa-mir-1252	chr12	+	79813036	79813100	hsa-mir-1252	hsa-mir-1252_-1_3	mature	0.17		79813040	79813060	AGAAGGAAATTGAATTCATTT	17	AGAAAGAAGGAAATTGAATTCATTTAGAAAAGAGAATTCCAAATGAGCTTAATTTCCTTTTTTCT
hsa-mir-1252	chr12	+	79813036	79813100	hsa-mir-1252	hsa-mir-1252	mature	0.12	Y	79813040	79813061	AGAAGGAAATTGAATTCATTTA	12	AGAAAGAAGGAAATTGAATTCATTTAGAAAAGAGAATTCCAAATGAGCTTAATTTCCTTTTTTCT
hsa-mir-1252	chr12	+	79813036	79813100	hsa-mir-1252	hsa-mir-1252_other1	other	0.18		79813042	79813063	AAGGAAATTGAATTCATTTAGA	18	AGAAAGAAGGAAATTGAATTCATTTAGAAAAGAGAATTCCAAATGAGCTTAATTTCCTTTTTTCT
hsa-mir-1252	chr12	+	79813036	79813100	hsa-mir-1252	hsa-mir-1252_other2	other	0.11		79813075	79813096	CAAATGAGCTTAATTTCCTTTT	11	AGAAAGAAGGAAATTGAATTCATTTAGAAAAGAGAATTCCAAATGAGCTTAATTTCCTTTTTTCT
hsa-mir-1252	chr12	+	79813036	79813100	hsa-mir-1252-star	hsa-mir-1252-star	star	0.22		79813077	79813098	AATGAGCTTAATTTCCTTTTTT	22	AGAAAGAAGGAAATTGAATTCATTTAGAAAAGAGAATTCCAAATGAGCTTAATTTCCTTTTTTCT
hsa-mir-1254	chr10	+	70519074	70519170	hsa-mir-1254	hsa-mir-1254_-1_3	mature	0.24		70519091	70519113	AGCCTGGAAGCTGGAGCCTGCAG	15	GGTGGGAGGATTGCTTGAGCCTGGAAGCTGGAGCCTGCAGTGAACTATCATTGTGCCACTGTACTCCAGCCTAGGCAACAAAATGAAATCCTGTCTA
hsa-mir-1254	chr10	+	70519074	70519170	hsa-mir-1254	hsa-mir-1254	mature	0.37	Y	70519091	70519114	AGCCTGGAAGCTGGAGCCTGCAGT	23	GGTGGGAGGATTGCTTGAGCCTGGAAGCTGGAGCCTGCAGTGAACTATCATTGTGCCACTGTACTCCAGCCTAGGCAACAAAATGAAATCCTGTCTA
hsa-mir-1255a	chr4	-	102251458	102251570	hsa-mir-1255a-star	hsa-mir-1255a-star_-1_5_Edit_2	starEdit	0.04		102251481	102251502	CTGTCTTCTTTGCTCATCCTTG	25	ATTGGAAATCCTTTGAGTTGCTTCTCAAGGATGAGCAAAGAAAGTAGATTTTTTAGATTCTAAAGAAACTATCTTCTTTGCTCATCCTTGAGAAGCAACTCCTTATCCATTAA
hsa-mir-1255a	chr4	-	102251458	102251570	hsa-mir-1255a-star	hsa-mir-1255a-star_-1_5	star	0.33		102251481	102251502	CTATCTTCTTTGCTCATCCTTG	203	ATTGGAAATCCTTTGAGTTGCTTCTCAAGGATGAGCAAAGAAAGTAGATTTTTTAGATTCTAAAGAAACTATCTTCTTTGCTCATCCTTGAGAAGCAACTCCTTATCCATTAA
hsa-mir-1255a	chr4	-	102251458	102251570	hsa-mir-1255a-star	hsa-mir-1255a-star_-1_3_+1_5_Edit_4	starEdit	0		102251482	102251504	AACTGTCTTCTTTGCTCATCCTT	5	ATTGGAAATCCTTTGAGTTGCTTCTCAAGGATGAGCAAAGAAAGTAGATTTTTTAGATTCTAAAGAAACTATCTTCTTTGCTCATCCTTGAGAAGCAACTCCTTATCCATTAA
hsa-mir-1255a	chr4	-	102251458	102251570	hsa-mir-1255a-star	hsa-mir-1255a-star_-1_3_+1_5	star	0.12		102251482	102251504	AACTATCTTCTTTGCTCATCCTT	77	ATTGGAAATCCTTTGAGTTGCTTCTCAAGGATGAGCAAAGAAAGTAGATTTTTTAGATTCTAAAGAAACTATCTTCTTTGCTCATCCTTGAGAAGCAACTCCTTATCCATTAA
hsa-mir-1255a	chr4	-	102251458	102251570	hsa-mir-1255a	hsa-mir-1255a	mature	0.08	Y	102251521	102251543	AGGATGAGCAAAGAAAGTAGATT	49	ATTGGAAATCCTTTGAGTTGCTTCTCAAGGATGAGCAAAGAAAGTAGATTTTTTAGATTCTAAAGAAACTATCTTCTTTGCTCATCCTTGAGAAGCAACTCCTTATCCATTAA
hsa-mir-1255b-1	chr4	-	36427987	36428049	hsa-mir-1255b-1	hsa-mir-1255b-1_+1_3	mature	0.42		36428025	36428047	CGGATGAGCAAAGAAAGTGGTTT	3	TACGGATGAGCAAAGAAAGTGGTTTCTTAAAATGGAATCTACTCTTTGTGAAGATGCTGTGAA
hsa-mir-1255b-1	chr4	-	36427987	36428049	hsa-mir-1255b-1	hsa-mir-1255b-1	mature	0.57	Y	36428026	36428047	CGGATGAGCAAAGAAAGTGGTT	4	TACGGATGAGCAAAGAAAGTGGTTTCTTAAAATGGAATCTACTCTTTGTGAAGATGCTGTGAA
hsa-mir-1255b-2	chr1	+	167967897	167967963	hsa-mir-1255b-2	hsa-mir-1255b-2	mature	0.57	Y	167967902	167967923	CGGATGAGCAAAGAAAGTGGTT	4	TCTTACGGATGAGCAAAGAAAGTGGTTTGCGCCTCAAGAAACCACTTTCTTTGCTCATCCATAAGGA
hsa-mir-1255b-2	chr1	+	167967897	167967963	hsa-mir-1255b-2	hsa-mir-1255b-2_+1_3	mature	0.42		167967902	167967924	CGGATGAGCAAAGAAAGTGGTTT	3	TCTTACGGATGAGCAAAGAAAGTGGTTTGCGCCTCAAGAAACCACTTTCTTTGCTCATCCATAAGGA
hsa-mir-1256	chr1	-	21314806	21314924	hsa-mir-1256-star	hsa-mir-1256-star_-1_5	star	0.13		21314834	21314854	TAAAGAGAAGTCAATGCATGA	19	AGTCAGCCTGTTGAAGCTTTGAAGCTTTGATGCCAGGCATTGACTTCTCACTAGCTGTGAAAGTCCTAGCTAAAGAGAAGTCAATGCATGACATCTTGTTTCAATAGATGGCTGTTTCA
hsa-mir-1256	chr1	-	21314806	21314924	hsa-mir-1256-star	hsa-mir-1256-star	star	0.34		21314834	21314855	CTAAAGAGAAGTCAATGCATGA	49	AGTCAGCCTGTTGAAGCTTTGAAGCTTTGATGCCAGGCATTGACTTCTCACTAGCTGTGAAAGTCCTAGCTAAAGAGAAGTCAATGCATGACATCTTGTTTCAATAGATGGCTGTTTCA
hsa-mir-1256	chr1	-	21314806	21314924	hsa-mir-1256	hsa-mir-1256	mature	0.09	Y	21314869	21314890	AGGCATTGACTTCTCACTAGCT	14	AGTCAGCCTGTTGAAGCTTTGAAGCTTTGATGCCAGGCATTGACTTCTCACTAGCTGTGAAAGTCCTAGCTAAAGAGAAGTCAATGCATGACATCTTGTTTCAATAGATGGCTGTTTCA
hsa-mir-1257	chr20	-	60528601	60528717	hsa-mir-1257	hsa-mir-1257_-1_5	mature	0.4		60528676	60528695	GTGAATGATGGGTTCTGACC	2	GCCCTGGGCTTGTGCTTGGGGAGTGAATGATGGGTTCTGACCCCCATGCACCCCTGTGGGCCCCTGGCATCACTGGCCCCATCCTTCACCCCTGCCAACCACGCTTGCCCTGTGCCT
hsa-mir-1257	chr20	-	60528601	60528717	hsa-mir-1257	hsa-mir-1257	mature	0.6	Y	60528676	60528696	AGTGAATGATGGGTTCTGACC	3	GCCCTGGGCTTGTGCTTGGGGAGTGAATGATGGGTTCTGACCCCCATGCACCCCTGTGGGCCCCTGGCATCACTGGCCCCATCCTTCACCCCTGCCAACCACGCTTGCCCTGTGCCT
hsa-mir-125a	chr19	+	52196506	52196591	hsa-mir-125a-5p	hsa-mir-125a-5p_-2_3	mature	0.18		52196520	52196541	TCCCTGAGACCCTTTAACCTGT	23404	TGCCAGTCTCTAGGTCCCTGAGACCCTTTAACCTGTGAGGACATCCAGGGTCACAGGTGAGGTTCTTGGGAGCCTGGCGTCTGGCC
hsa-mir-125a	chr19	+	52196506	52196591	hsa-mir-125a-5p	hsa-mir-125a-5p	mature	0.64	Y	52196520	52196543	TCCCTGAGACCCTTTAACCTGTGA	81557	TGCCAGTCTCTAGGTCCCTGAGACCCTTTAACCTGTGAGGACATCCAGGGTCACAGGTGAGGTTCTTGGGAGCCTGGCGTCTGGCC
hsa-mir-125a	chr19	+	52196506	52196591	hsa-mir-125a-3p	hsa-mir-125a-3p	mature	0	Y	52196558	52196579	ACAGGTGAGGTTCTTGGGAGCC	490	TGCCAGTCTCTAGGTCCCTGAGACCCTTTAACCTGTGAGGACATCCAGGGTCACAGGTGAGGTTCTTGGGAGCCTGGCGTCTGGCC
hsa-mir-125b-1	chr11	-	121970464	121970551	hsa-mir-125b-1	hsa-mir-125b-1_+1_3	mature	0.19		121970515	121970537	TCCCTGAGACCCTAACTTGTGAT	82	TGCGCTCCTCTCAGTCCCTGAGACCCTAACTTGTGATGTTTACCGTTTAAATCCACGGGTTAGGCTCTTGGGAGCTGCGAGTCGTGCT
hsa-mir-125b-1	chr11	-	121970464	121970551	hsa-mir-125b-1	hsa-mir-125b-1	mature	0.69	Y	121970516	121970537	TCCCTGAGACCCTAACTTGTGA	291	TGCGCTCCTCTCAGTCCCTGAGACCCTAACTTGTGATGTTTACCGTTTAAATCCACGGGTTAGGCTCTTGGGAGCTGCGAGTCGTGCT
hsa-mir-125b-2	chr21	+	17962556	17962644	hsa-mir-125b-2	hsa-mir-125b-2	mature	0.83	Y	17962572	17962593	TCCCTGAGACCCTAACTTGTGA	291	ACCAGACTTTTCCTAGTCCCTGAGACCCTAACTTGTGAGGTATTTTAGTAACATCACAAGTCAGGCTCTTGGGACCTAGGCGGAGGGGA
hsa-mir-126	chr9	+	139565053	139565137	hsa-mir-126*	hsa-mir-126*_-1_3	mature	0.13		139565067	139565086	CATTATTACTTTTGGTACGC	3	CGCTGGCGACGGGACATTATTACTTTTGGTACGCGCTGTGACACTTCAAACTCGTACCGTGAGTAATAATGCGCCGTCCACGGCA
hsa-mir-126	chr9	+	139565053	139565137	hsa-mir-126*	hsa-mir-126*	mature	0.4	Y	139565067	139565087	CATTATTACTTTTGGTACGCG	9	CGCTGGCGACGGGACATTATTACTTTTGGTACGCGCTGTGACACTTCAAACTCGTACCGTGAGTAATAATGCGCCGTCCACGGCA
hsa-mir-126	chr9	+	139565053	139565137	hsa-mir-126	hsa-mir-126_-1_3	mature	0.18		139565104	139565124	TCGTACCGTGAGTAATAATGC	4	CGCTGGCGACGGGACATTATTACTTTTGGTACGCGCTGTGACACTTCAAACTCGTACCGTGAGTAATAATGCGCCGTCCACGGCA
hsa-mir-126	chr9	+	139565053	139565137	hsa-mir-126	hsa-mir-126_-1_5	mature	0.22		139565105	139565125	CGTACCGTGAGTAATAATGCG	5	CGCTGGCGACGGGACATTATTACTTTTGGTACGCGCTGTGACACTTCAAACTCGTACCGTGAGTAATAATGCGCCGTCCACGGCA
hsa-mir-1260	chr14	+	77732560	77732632	hsa-mir-1260	hsa-mir-1260	mature	0.98	Y	77732573	77732590	ATCCCACCTCTGCCACCA	12320	ACCTTTCCAGCTCATCCCACCTCTGCCACCAAAACACTCATCGCGGGGTCAGAGGGAGTGCCAAAAAAGGTAA
hsa-mir-1260b	chr11	+	96074601	96074689	hsa-mir-1260b	hsa-mir-1260b_-1_3	mature	0.99		96074610	96074627	ATCCCACCACTGCCACCA	12247	TCTCCGTTTATCCCACCACTGCCACCATTATTGCTACTGTTCAGCAGGTGCTGCTGGTGGTGATGGTGATAGTCTGGTGGGGGCGGTGG
hsa-mir-1260b	chr11	+	96074601	96074689	hsa-mir-1260b	hsa-mir-1260b	mature	0	Y	96074610	96074628	ATCCCACCACTGCCACCAT	55	TCTCCGTTTATCCCACCACTGCCACCATTATTGCTACTGTTCAGCAGGTGCTGCTGGTGGTGATGGTGATAGTCTGGTGGGGGCGGTGG
hsa-mir-1266	chr15	-	52569313	52569396	hsa-mir-1266-star	hsa-mir-1266-star	star	0.34		52569327	52569348	CCCTGTTCTATGCCCTGAGGGA	11	ACAGGTAGTGTCCCTCAGGGCTGTAGAACAGGGCTGGGATTACTAAAGCCCTGTTCTATGCCCTGAGGGACACTGAGCATGTCA
hsa-mir-1266	chr15	-	52569313	52569396	hsa-mir-1266-star	hsa-mir-1266-star_-1_3	star	0.15		52569328	52569348	CCCTGTTCTATGCCCTGAGGG	5	ACAGGTAGTGTCCCTCAGGGCTGTAGAACAGGGCTGGGATTACTAAAGCCCTGTTCTATGCCCTGAGGGACACTGAGCATGTCA
hsa-mir-1266	chr15	-	52569313	52569396	hsa-mir-1266	hsa-mir-1266	mature	0.25	Y	52569362	52569384	CCTCAGGGCTGTAGAACAGGGCT	8	ACAGGTAGTGTCCCTCAGGGCTGTAGAACAGGGCTGGGATTACTAAAGCCCTGTTCTATGCCCTGAGGGACACTGAGCATGTCA
hsa-mir-1266	chr15	-	52569313	52569396	hsa-mir-1266	hsa-mir-1266_-1_3	mature	0.12		52569363	52569384	CCTCAGGGCTGTAGAACAGGGC	4	ACAGGTAGTGTCCCTCAGGGCTGTAGAACAGGGCTGGGATTACTAAAGCCCTGTTCTATGCCCTGAGGGACACTGAGCATGTCA
hsa-mir-1267	chr13	-	108183518	108183595	hsa-mir-1267	hsa-mir-1267	mature	0.75	Y	108183564	108183584	CCTGTTGAAGTGTAATCCCCA	9	CTCCCAAATCTCCTGTTGAAGTGTAATCCCCACCTCCAGCATTGGGGATTACATTTCAACATGAGATTTGGATGAGGA
hsa-mir-1267	chr13	-	108183518	108183595	hsa-mir-1267	hsa-mir-1267_-1_3	mature	0.25		108183565	108183584	CCTGTTGAAGTGTAATCCCC	3	CTCCCAAATCTCCTGTTGAAGTGTAATCCCCACCTCCAGCATTGGGGATTACATTTCAACATGAGATTTGGATGAGGA
hsa-mir-1269	chr4	+	67142541	67142645	hsa-mir-1269	hsa-mir-1269_-2_3	mature	0.4		67142607	67142626	CTGGACTGAGCCGTGCTACT	6	TGGATTGCCTAGACCAGGGAAGCCAGTTGGCATGGCTCAGTCCAAGTCTGACCACCTGAGGAATGCCTGGACTGAGCCGTGCTACTGGCTTCCCTGGTCTCCAGC
hsa-mir-1269	chr4	+	67142541	67142645	hsa-mir-1269	hsa-mir-1269	mature	0.46	Y	67142607	67142628	CTGGACTGAGCCGTGCTACTGG	7	TGGATTGCCTAGACCAGGGAAGCCAGTTGGCATGGCTCAGTCCAAGTCTGACCACCTGAGGAATGCCTGGACTGAGCCGTGCTACTGGCTTCCCTGGTCTCCAGC
hsa-mir-1273c	chr6	+	155174493	155174569	hsa-mir-1273c	hsa-mir-1273c_-1_3	mature	0.11		155174502	155174522	GGCGACAAAACGAGACCCTGT	5	TGCAGCCTGGGCGACAAAACGAGACCCTGTCTTTTTTTTTTTCTGAGACAGAGTCTCGTTCTGTTGCCCAAGCTGGA
hsa-mir-1273c	chr6	+	155174493	155174569	hsa-mir-1273c	hsa-mir-1273c	mature	0.02	Y	155174502	155174523	GGCGACAAAACGAGACCCTGTC	1	TGCAGCCTGGGCGACAAAACGAGACCCTGTCTTTTTTTTTTTCTGAGACAGAGTCTCGTTCTGTTGCCCAAGCTGGA
hsa-mir-1273c	chr6	+	155174493	155174569	hsa-mir-1273c-star	hsa-mir-1273c-star_+1_3	star	0.31		155174541	155174563	CAGAGTCTCGTTCTGTTGCCCAA	14	TGCAGCCTGGGCGACAAAACGAGACCCTGTCTTTTTTTTTTTCTGAGACAGAGTCTCGTTCTGTTGCCCAAGCTGGA
hsa-mir-1273c	chr6	+	155174493	155174569	hsa-mir-1273c-star	hsa-mir-1273c-star_+2_3	star	0.36		155174541	155174564	CAGAGTCTCGTTCTGTTGCCCAAG	16	TGCAGCCTGGGCGACAAAACGAGACCCTGTCTTTTTTTTTTTCTGAGACAGAGTCTCGTTCTGTTGCCCAAGCTGGA
hsa-mir-1274a	chr5	+	41475733	41475803	hsa-mir-1274a	hsa-mir-1274a_+1_5	mature	0.8		41475745	41475763	TGTCCCTGTTCAGGCGCCA	572	GATGTCCCTGTTTGTCCCTGTTCAGGCGCCACCTGTGGCTGTCTGCCACAAGTACTATTTGAGACCATCAC
hsa-mir-1274a	chr5	+	41475733	41475803	hsa-mir-1274a	hsa-mir-1274a	mature	0.11	Y	41475746	41475763	GTCCCTGTTCAGGCGCCA	83	GATGTCCCTGTTTGTCCCTGTTCAGGCGCCACCTGTGGCTGTCTGCCACAAGTACTATTTGAGACCATCAC
hsa-mir-1274b	chr19	-	58024374	58024440	hsa-mir-1274b	hsa-mir-1274b	mature	0.12	Y	58024410	58024426	TCCCTGTTCGGGCGCCA	827	CTTCTTCACTCACGTCCCTGTTCGGGCGCCACTTGTGGCTGTCGGTTCGGGACTGAATGAAGAAGGA
hsa-mir-1274b	chr19	-	58024374	58024440	hsa-mir-1274b	hsa-mir-1274b_+1_5	mature	0.37		58024410	58024427	GTCCCTGTTCGGGCGCCA	2464	CTTCTTCACTCACGTCCCTGTTCGGGCGCCACTTGTGGCTGTCGGTTCGGGACTGAATGAAGAAGGA
hsa-mir-1274b	chr19	-	58024374	58024440	hsa-mir-1274b	hsa-mir-1274b_+2_5	mature	0.12		58024410	58024428	CGTCCCTGTTCGGGCGCCA	801	CTTCTTCACTCACGTCCCTGTTCGGGCGCCACTTGTGGCTGTCGGTTCGGGACTGAATGAAGAAGGA
hsa-mir-1274b	chr19	-	58024374	58024440	hsa-mir-1274b	hsa-mir-1274b_other1	other	0.32		58024410	58024431	TCACGTCCCTGTTCGGGCGCCA	2124	CTTCTTCACTCACGTCCCTGTTCGGGCGCCACTTGTGGCTGTCGGTTCGGGACTGAATGAAGAAGGA
hsa-mir-1275	chr6	-	33967748	33967827	hsa-mir-1275	hsa-mir-1275	mature	0.33	Y	33967794	33967810	GTGGGGGAGAGGCTGTC	16	CCTCTGTGAGAAAGGGTGTGGGGGAGAGGCTGTCTTGTGTCTGTAAGTATGCCAAACTTATTTTCCCCAAGGCAGAGGGA
hsa-mir-1275	chr6	-	33967748	33967827	hsa-mir-1275	hsa-mir-1275_-1_3	mature	0.35		33967795	33967810	GTGGGGGAGAGGCTGT	17	CCTCTGTGAGAAAGGGTGTGGGGGAGAGGCTGTCTTGTGTCTGTAAGTATGCCAAACTTATTTTCCCCAAGGCAGAGGGA
hsa-mir-1275	chr6	-	33967748	33967827	hsa-mir-1275	hsa-mir-1275_-2_3	mature	0.25		33967796	33967810	GTGGGGGAGAGGCTG	12	CCTCTGTGAGAAAGGGTGTGGGGGAGAGGCTGTCTTGTGTCTGTAAGTATGCCAAACTTATTTTCCCCAAGGCAGAGGGA
hsa-mir-1276	chr15	-	86313726	86313808	hsa-mir-1276	hsa-mir-1276_+2_3	mature	0.57		86313776	86313797	TAAAGAGCCCTGTGGAGACACC	8	CCCCAGCTAGGTAAAGAGCCCTGTGGAGACACCTGGATTCAGAGAACATGTCTCCACTGAGCACTTGGGCCTTGATGGCGGCT
hsa-mir-1276	chr15	-	86313726	86313808	hsa-mir-1276	hsa-mir-1276_+1_3	mature	0.14		86313777	86313797	TAAAGAGCCCTGTGGAGACAC	2	CCCCAGCTAGGTAAAGAGCCCTGTGGAGACACCTGGATTCAGAGAACATGTCTCCACTGAGCACTTGGGCCTTGATGGCGGCT
hsa-mir-1276	chr15	-	86313726	86313808	hsa-mir-1276	hsa-mir-1276	mature	0.14	Y	86313778	86313797	TAAAGAGCCCTGTGGAGACA	2	CCCCAGCTAGGTAAAGAGCCCTGTGGAGACACCTGGATTCAGAGAACATGTCTCCACTGAGCACTTGGGCCTTGATGGCGGCT
hsa-mir-1277	chrX	+	117520356	117520433	hsa-mir-1277-star	hsa-mir-1277-star_-1_3	star	0.36		117520366	117520386	TATATATATATATGTACGTAT	1317	ACCTCCCAAATATATATATATATGTACGTATGTGTATATAAATGTATACGTAGATATATATGTATTTTTGGTGGGTTT
hsa-mir-1277	chrX	+	117520356	117520433	hsa-mir-1277-star	hsa-mir-1277-star	star	0.39		117520366	117520387	TATATATATATATGTACGTATG	1413	ACCTCCCAAATATATATATATATGTACGTATGTGTATATAAATGTATACGTAGATATATATGTATTTTTGGTGGGTTT
hsa-mir-1277	chrX	+	117520356	117520433	hsa-mir-1277	hsa-mir-1277	mature	0.1	Y	117520402	117520423	TACGTAGATATATATGTATTTT	390	ACCTCCCAAATATATATATATATGTACGTATGTGTATATAAATGTATACGTAGATATATATGTATTTTTGGTGGGTTT
hsa-mir-1278	chr1	+	193105632	193105712	hsa-mir-1278	hsa-mir-1278_-2_3	mature	0.15		193105681	193105700	TAGTACTGTGCATATCATCT	21	ATTTGCTCATAGATGATATGCATAGTACTCCCAGAACTCATTAAGTTGGTAGTACTGTGCATATCATCTATGAGCGAATAG
hsa-mir-1278	chr1	+	193105632	193105712	hsa-mir-1278	hsa-mir-1278	mature	0.42	Y	193105681	193105702	TAGTACTGTGCATATCATCTAT	58	ATTTGCTCATAGATGATATGCATAGTACTCCCAGAACTCATTAAGTTGGTAGTACTGTGCATATCATCTATGAGCGAATAG
hsa-mir-128-1	chr2	+	136422966	136423047	hsa-mir-128-1	hsa-mir-128-1	mature	0.56	Y	136423015	136423035	TCACAGTGAACCGGTCTCTTT	19563	TGAGCTGTTGGATTCGGGGCCGTAGCACTGTCTGAGAGGTTTACATTTCTCACAGTGAACCGGTCTCTTTTTCAGCTGCTTC
hsa-mir-128-1	chr2	+	136422966	136423047	hsa-mir-128-1	hsa-mir-128-1_+1_3	mature	0.22		136423015	136423036	TCACAGTGAACCGGTCTCTTTT	7679	TGAGCTGTTGGATTCGGGGCCGTAGCACTGTCTGAGAGGTTTACATTTCTCACAGTGAACCGGTCTCTTTTTCAGCTGCTTC
hsa-mir-128-2	chr3	+	35785967	35786050	hsa-mir-128-2	hsa-mir-128-2_-1_3	mature	0.11		35786018	35786037	TCACAGTGAACCGGTCTCTT	3058	TGTGCAGTGGGAAGGGGGGCCGATACACTGTACGAGAGTGAGTAGCAGGTCTCACAGTGAACCGGTCTCTTTCCCTACTGTGTC
hsa-mir-128-2	chr3	+	35785967	35786050	hsa-mir-128-2	hsa-mir-128-2	mature	0.76	Y	35786018	35786038	TCACAGTGAACCGGTCTCTTT	19563	TGTGCAGTGGGAAGGGGGGCCGATACACTGTACGAGAGTGAGTAGCAGGTCTCACAGTGAACCGGTCTCTTTCCCTACTGTGTC
hsa-mir-1280	chr3	+	128081007	128081100	hsa-mir-1280	hsa-mir-1280_-1_3	mature	0.86		128081011	128081026	TCCCACCGCTGCCACC	26	TCTGTCCCACCGCTGCCACCCTCCCCTCTGCCTCAGTGTGCCAGGCATCAGCACTCACTCACAGAGGCAGGCTGGATGGCGGGTGGGACAACAG
hsa-mir-1284	chr3	-	71591120	71591239	hsa-mir-1284	hsa-mir-1284	mature	0.41	Y	71591189	71591210	TCTATACAGACCCTGGCTTTTC	45	ATTTTGATATATAAGCCAGTTTAATGTTTTCTATACAGACCCTGGCTTTTCTTAAATTTTATATATTGGAAAGCCCATGTTTGTATTGGAAACTGCTGGTTTCTTTCATACTGAAAATCT
hsa-mir-1284	chr3	-	71591120	71591239	hsa-mir-1284	hsa-mir-1284_-1_3_-1_5	mature	0.11		71591190	71591209	CTATACAGACCCTGGCTTTT	12	ATTTTGATATATAAGCCAGTTTAATGTTTTCTATACAGACCCTGGCTTTTCTTAAATTTTATATATTGGAAAGCCCATGTTTGTATTGGAAACTGCTGGTTTCTTTCATACTGAAAATCT
hsa-mir-1284	chr3	-	71591120	71591239	hsa-mir-1284	hsa-mir-1284_-1_3	mature	0.3		71591190	71591210	TCTATACAGACCCTGGCTTTT	33	ATTTTGATATATAAGCCAGTTTAATGTTTTCTATACAGACCCTGGCTTTTCTTAAATTTTATATATTGGAAAGCCCATGTTTGTATTGGAAACTGCTGGTTTCTTTCATACTGAAAATCT
hsa-mir-1285-1	chr7	-	91833328	91833411	hsa-mir-1285-1	hsa-mir-1285-1_+2_3	mature	0.17		91833338	91833361	TCTGGGCAACAAAGTGAGACCTTA	8	TGTAGAGATAGGATCTCACTTTGTTGCCCAGGCTGGTCTCAAACTCCTGGTCTGGGCAACAAAGTGAGACCTTATCTCTACAAG
hsa-mir-1285-1	chr7	-	91833328	91833411	hsa-mir-1285-1	hsa-mir-1285-1_+1_3	mature	0.25		91833339	91833361	TCTGGGCAACAAAGTGAGACCTT	12	TGTAGAGATAGGATCTCACTTTGTTGCCCAGGCTGGTCTCAAACTCCTGGTCTGGGCAACAAAGTGAGACCTTATCTCTACAAG
hsa-mir-1285-1	chr7	-	91833328	91833411	hsa-mir-1285-1	hsa-mir-1285-1	mature	0.51	Y	91833340	91833361	TCTGGGCAACAAAGTGAGACCT	24	TGTAGAGATAGGATCTCACTTTGTTGCCCAGGCTGGTCTCAAACTCCTGGTCTGGGCAACAAAGTGAGACCTTATCTCTACAAG
hsa-mir-1285-2	chr2	-	70480049	70480136	hsa-mir-1285-2	hsa-mir-1285-2	mature	1	Y	70480064	70480085	TCTGGGCAACAAAGTGAGACCT	24	TTTGGGAGGCCGAGGCTGGTGCATCACTTGAGCCCAGCAATTTGAGACCAATCTGGGCAACAAAGTGAGACCTCCGTCTCTACAAAGA
hsa-mir-1286	chr22	-	20236656	20236733	hsa-mir-1286	hsa-mir-1286_+1_3	mature	0.18		20236666	20236687	TGCAGGACCAAGATGAGCCCTT	4	TGTCCTCTGGGGACTCAGCTTGCTCTGGCTGCTGGATTGAATTAGCTGCAGGACCAAGATGAGCCCTTGGTGGAGACA
hsa-mir-1286	chr22	-	20236656	20236733	hsa-mir-1286	hsa-mir-1286	mature	0.5	Y	20236667	20236687	TGCAGGACCAAGATGAGCCCT	11	TGTCCTCTGGGGACTCAGCTTGCTCTGGCTGCTGGATTGAATTAGCTGCAGGACCAAGATGAGCCCTTGGTGGAGACA
hsa-mir-1286	chr22	-	20236656	20236733	hsa-mir-1286	hsa-mir-1286_-1_3	mature	0.22		20236668	20236687	TGCAGGACCAAGATGAGCCC	5	TGTCCTCTGGGGACTCAGCTTGCTCTGGCTGCTGGATTGAATTAGCTGCAGGACCAAGATGAGCCCTTGGTGGAGACA
hsa-mir-1287	chr10	-	100154974	100155063	hsa-mir-1287-star	hsa-mir-1287-star	star	0.1		100154988	100155009	CTCTAGCCACAGATGCAGTGAT	16	GTTGTGCTGTCCAGGTGCTGGATCAGTGGTTCGAGTCTGAGCCTTTAAAAGCCACTCTAGCCACAGATGCAGTGATTGGAGCCATGACAA
hsa-mir-1287	chr10	-	100154974	100155063	hsa-mir-1287	hsa-mir-1287_+1_3	mature	0.1		100155026	100155048	TGCTGGATCAGTGGTTCGAGTCT	16	GTTGTGCTGTCCAGGTGCTGGATCAGTGGTTCGAGTCTGAGCCTTTAAAAGCCACTCTAGCCACAGATGCAGTGATTGGAGCCATGACAA
hsa-mir-1287	chr10	-	100154974	100155063	hsa-mir-1287	hsa-mir-1287	mature	0.28	Y	100155027	100155048	TGCTGGATCAGTGGTTCGAGTC	42	GTTGTGCTGTCCAGGTGCTGGATCAGTGGTTCGAGTCTGAGCCTTTAAAAGCCACTCTAGCCACAGATGCAGTGATTGGAGCCATGACAA
hsa-mir-1287	chr10	-	100154974	100155063	hsa-mir-1287	hsa-mir-1287_-1_3	mature	0.32		100155028	100155048	TGCTGGATCAGTGGTTCGAGT	48	GTTGTGCTGTCCAGGTGCTGGATCAGTGGTTCGAGTCTGAGCCTTTAAAAGCCACTCTAGCCACAGATGCAGTGATTGGAGCCATGACAA
hsa-mir-1287	chr10	-	100154974	100155063	hsa-mir-1287	hsa-mir-1287_-2_3	mature	0.1		100155029	100155048	TGCTGGATCAGTGGTTCGAG	16	GTTGTGCTGTCCAGGTGCTGGATCAGTGGTTCGAGTCTGAGCCTTTAAAAGCCACTCTAGCCACAGATGCAGTGATTGGAGCCATGACAA
hsa-mir-1289-1	chr20	-	34041775	34041918	hsa-mir-1289-1	hsa-mir-1289-1_-1_3	mature	0.83		34041812	34041833	TGGAGTCCAGGAATCTGCATTT	5	TTCTCAATTTTTAGTAGGAATTAAAAACAAAACTGGTAAATGCAGACTCTTGGTTTCCACCCCCAGAGAATCCCTAAACCGGGGGTGGAGTCCAGGAATCTGCATTTTAGAAAGTACCCAGGGTGATTCTGATAATTGGGAACA
hsa-mir-1289-1	chr20	-	34041775	34041918	hsa-mir-1289-1-star	hsa-mir-1289-1-star_-2_5	star	0.16		34041858	34041878	TGCAGACTCTTGGTTTCCACC	1	TTCTCAATTTTTAGTAGGAATTAAAAACAAAACTGGTAAATGCAGACTCTTGGTTTCCACCCCCAGAGAATCCCTAAACCGGGGGTGGAGTCCAGGAATCTGCATTTTAGAAAGTACCCAGGGTGATTCTGATAATTGGGAACA
hsa-mir-1289-2	chr5	-	132763287	132763397	hsa-mir-1289-2	hsa-mir-1289-2_-1_3	mature	1		132763307	132763328	TGGAGTCCAGGAATCTGCATTT	5	CCACGGTCCTAGTTAAAAAGGCACATTCCTAGACCCTGCCTCAGAACTACTGAACAGAGTCACTGGGTGTGGAGTCCAGGAATCTGCATTTTTACCCCTATCGCCCCCGCC
hsa-mir-129-1	chr7	+	127847924	127847995	hsa-mir-129-1-5p	hsa-mir-129-1-5p_-2_3	mature	0.2		127847928	127847946	CTTTTTGCGGTCTGGGCTT	1	GGATCTTTTTGCGGTCTGGGCTTGCTGTTCCTCTCAACAGTAGTCAGGAAGCCCTTACCCCAAAAAGTATCT
hsa-mir-129-1	chr7	+	127847924	127847995	hsa-mir-129-1-5p	hsa-mir-129-1-5p	mature	0.4	Y	127847928	127847948	CTTTTTGCGGTCTGGGCTTGC	2	GGATCTTTTTGCGGTCTGGGCTTGCTGTTCCTCTCAACAGTAGTCAGGAAGCCCTTACCCCAAAAAGTATCT
hsa-mir-129-1	chr7	+	127847924	127847995	hsa-mir-129-1*	hsa-mir-129-1*_-1_3	mature	0.2		127847972	127847992	AAGCCCTTACCCCAAAAAGTA	1	GGATCTTTTTGCGGTCTGGGCTTGCTGTTCCTCTCAACAGTAGTCAGGAAGCCCTTACCCCAAAAAGTATCT
hsa-mir-129-1	chr7	+	127847924	127847995	hsa-mir-129-1*	hsa-mir-129-1*	mature	0.2	Y	127847972	127847993	AAGCCCTTACCCCAAAAAGTAT	1	GGATCTTTTTGCGGTCTGGGCTTGCTGTTCCTCTCAACAGTAGTCAGGAAGCCCTTACCCCAAAAAGTATCT
hsa-mir-129-2	chr11	+	43602943	43603032	hsa-mir-129-2-5p	hsa-mir-129-2-5p	mature	0.09	Y	43602957	43602977	CTTTTTGCGGTCTGGGCTTGC	2	TGCCCTTCGCGAATCTTTTTGCGGTCTGGGCTTGCTGTACATAACTCAATAGCCGGAAGCCCTTACCCCAAAAAGCATTTGCGGAGGGCG
hsa-mir-129-2	chr11	+	43602943	43603032	hsa-mir-129-2-3p	hsa-mir-129-2-3p	mature	0.76	Y	43602999	43603020	AAGCCCTTACCCCAAAAAGCAT	16	TGCCCTTCGCGAATCTTTTTGCGGTCTGGGCTTGCTGTACATAACTCAATAGCCGGAAGCCCTTACCCCAAAAAGCATTTGCGGAGGGCG
hsa-mir-1292	chr20	+	2633422	2633487	hsa-mir-1292	hsa-mir-1292_-3_3	mature	0.2		2633424	2633445	TGGGAACGGGTTCCGGCAGACG	2	CCTGGGAACGGGTTCCGGCAGACGCTGAGGTTGCGTTGACGCTCGCGCCCCGGCTCCCGTTCCAGG
hsa-mir-1292	chr20	+	2633422	2633487	hsa-mir-1292	hsa-mir-1292_+1_3	mature	0.1		2633424	2633449	TGGGAACGGGTTCCGGCAGACGCTGA	1	CCTGGGAACGGGTTCCGGCAGACGCTGAGGTTGCGTTGACGCTCGCGCCCCGGCTCCCGTTCCAGG
hsa-mir-1293	chr12	-	50627924	50627994	hsa-mir-1293-star	hsa-mir-1293-star_+2_3_-1_5	star	0.21		50627927	50627949	CAAATCTCCGGACCACTTAGTCT	8	AGGTTGTTCTGGGTGGTCTGGAGATTTGTGCAGCTTGTACCTGCACAAATCTCCGGACCACTTAGTCTTTA
hsa-mir-1293	chr12	-	50627924	50627994	hsa-mir-1293-star	hsa-mir-1293-star	star	0.18		50627929	50627950	ACAAATCTCCGGACCACTTAGT	7	AGGTTGTTCTGGGTGGTCTGGAGATTTGTGCAGCTTGTACCTGCACAAATCTCCGGACCACTTAGTCTTTA
hsa-mir-1293	chr12	-	50627924	50627994	hsa-mir-1293-star	hsa-mir-1293-star_+1_5	star	0.13		50627929	50627951	CACAAATCTCCGGACCACTTAGT	5	AGGTTGTTCTGGGTGGTCTGGAGATTTGTGCAGCTTGTACCTGCACAAATCTCCGGACCACTTAGTCTTTA
hsa-mir-1294	chr5	+	153726665	153726806	hsa-mir-1294	hsa-mir-1294_-2_3	mature	0.38		153726712	153726731	TGTGAGGTTGGCATTGTTGT	7	CACCTAATGTGTGCCAAGATCTGTTCATTTATGATCTCACCGAGTCCTGTGAGGTTGGCATTGTTGTCTGGCATTGTCTGATATACAACAGTGCCAACCTCACAGGACTCAGTGAGGTGAAACTGAGGATTAGGAAGGTGTA
hsa-mir-1294	chr5	+	153726665	153726806	hsa-mir-1294	hsa-mir-1294_-1_3	mature	0.11		153726712	153726732	TGTGAGGTTGGCATTGTTGTC	2	CACCTAATGTGTGCCAAGATCTGTTCATTTATGATCTCACCGAGTCCTGTGAGGTTGGCATTGTTGTCTGGCATTGTCTGATATACAACAGTGCCAACCTCACAGGACTCAGTGAGGTGAAACTGAGGATTAGGAAGGTGTA
hsa-mir-1294	chr5	+	153726665	153726806	hsa-mir-1294	hsa-mir-1294	mature	0.5	Y	153726712	153726733	TGTGAGGTTGGCATTGTTGTCT	9	CACCTAATGTGTGCCAAGATCTGTTCATTTATGATCTCACCGAGTCCTGTGAGGTTGGCATTGTTGTCTGGCATTGTCTGATATACAACAGTGCCAACCTCACAGGACTCAGTGAGGTGAAACTGAGGATTAGGAAGGTGTA
hsa-mir-1295	chr1	-	171070868	171070946	hsa-mir-1295	hsa-mir-1295_+1_3	mature	0.25		171070877	171070898	TTAGGCCGCAGATCTGGGTGAA	2	AGGACATTTTGCCCAGATCCGTGGCCTATTCAGAAATGTGGCCTGTGATTAGGCCGCAGATCTGGGTGAAATGTCCTCC
hsa-mir-1295	chr1	-	171070868	171070946	hsa-mir-1295	hsa-mir-1295	mature	0.5	Y	171070878	171070898	TTAGGCCGCAGATCTGGGTGA	4	AGGACATTTTGCCCAGATCCGTGGCCTATTCAGAAATGTGGCCTGTGATTAGGCCGCAGATCTGGGTGAAATGTCCTCC
hsa-mir-1295	chr1	-	171070868	171070946	hsa-mir-1295-star	hsa-mir-1295-star_-1_3_+1_5	star	0.25		171070917	171070937	TGCCCAGATCCGTGGCCTATT	2	AGGACATTTTGCCCAGATCCGTGGCCTATTCAGAAATGTGGCCTGTGATTAGGCCGCAGATCTGGGTGAAATGTCCTCC
hsa-mir-1296	chr10	-	65132716	65132807	hsa-mir-1296	hsa-mir-1296	mature	0.44	Y	65132771	65132792	TTAGGGCCCTGGCTCCATCTCC	2234	ACCTACCTAACTGGGTTAGGGCCCTGGCTCCATCTCCTTTAGGAAAACCTTCTGTGGGGAGTGGGGCTTCGACCCTAACCCAGGTGGGCTGT
hsa-mir-1296	chr10	-	65132716	65132807	hsa-mir-1296	hsa-mir-1296_-1_3	mature	0.16		65132772	65132792	TTAGGGCCCTGGCTCCATCTC	829	ACCTACCTAACTGGGTTAGGGCCCTGGCTCCATCTCCTTTAGGAAAACCTTCTGTGGGGAGTGGGGCTTCGACCCTAACCCAGGTGGGCTGT
hsa-mir-1296	chr10	-	65132716	65132807	hsa-mir-1296	hsa-mir-1296_-2_3	mature	0.16		65132773	65132792	TTAGGGCCCTGGCTCCATCT	846	ACCTACCTAACTGGGTTAGGGCCCTGGCTCCATCTCCTTTAGGAAAACCTTCTGTGGGGAGTGGGGCTTCGACCCTAACCCAGGTGGGCTGT
hsa-mir-1299	chr9	-	69002238	69002320	hsa-mir-1299	hsa-mir-1299	mature	0.58	Y	69002238	69002259	TTCTGGAATTCTGTGTGAGGGA	17	CCTCATGGCAGTGTTCTGGAATCCTACGTGAGGGACAATCATTCAGACCCACGTAGCAGTGTTCTGGAATTCTGTGTGAGGGA
hsa-mir-1299	chr9	-	69002238	69002320	hsa-mir-1299	hsa-mir-1299_-1_3	mature	0.17		69002239	69002259	TTCTGGAATTCTGTGTGAGGG	5	CCTCATGGCAGTGTTCTGGAATCCTACGTGAGGGACAATCATTCAGACCCACGTAGCAGTGTTCTGGAATTCTGTGTGAGGGA
hsa-mir-1299	chr9	-	69002238	69002320	hsa-mir-1299	hsa-mir-1299_-2_3	mature	0.17		69002240	69002259	TTCTGGAATTCTGTGTGAGG	5	CCTCATGGCAGTGTTCTGGAATCCTACGTGAGGGACAATCATTCAGACCCACGTAGCAGTGTTCTGGAATTCTGTGTGAGGGA
hsa-mir-1301	chr2	-	25551508	25551589	hsa-mir-1301	hsa-mir-1301	mature	0.1	Y	25551519	25551542	TTGCAGCTGCCTGGGAGTGACTTC	18	GGATTGTGGGGGGTCGCTCTAGGCACCGCAGCACTGTGCTGGGGATGTTGCAGCTGCCTGGGAGTGACTTCACACAGTCCTC
hsa-mir-1301	chr2	-	25551508	25551589	hsa-mir-1301	hsa-mir-1301_-1_3	mature	0.11		25551520	25551542	TTGCAGCTGCCTGGGAGTGACTT	20	GGATTGTGGGGGGTCGCTCTAGGCACCGCAGCACTGTGCTGGGGATGTTGCAGCTGCCTGGGAGTGACTTCACACAGTCCTC
hsa-mir-1301	chr2	-	25551508	25551589	hsa-mir-1301	hsa-mir-1301_-2_3	mature	0.12		25551521	25551542	TTGCAGCTGCCTGGGAGTGACT	22	GGATTGTGGGGGGTCGCTCTAGGCACCGCAGCACTGTGCTGGGGATGTTGCAGCTGCCTGGGAGTGACTTCACACAGTCCTC
hsa-mir-1301	chr2	-	25551508	25551589	hsa-mir-1301	hsa-mir-1301_-3_3	mature	0.22		25551522	25551542	TTGCAGCTGCCTGGGAGTGAC	39	GGATTGTGGGGGGTCGCTCTAGGCACCGCAGCACTGTGCTGGGGATGTTGCAGCTGCCTGGGAGTGACTTCACACAGTCCTC
hsa-mir-1301	chr2	-	25551508	25551589	hsa-mir-1301	hsa-mir-1301_other1	other	0.21		25551523	25551542	TTGCAGCTGCCTGGGAGTGA	37	GGATTGTGGGGGGTCGCTCTAGGCACCGCAGCACTGTGCTGGGGATGTTGCAGCTGCCTGGGAGTGACTTCACACAGTCCTC
hsa-mir-1302-1	chr12	-	113132838	113132980	hsa-mir-1302-1	hsa-mir-1302-1	mature	0.4	Y	113132886	113132906	TTGGGACATACTTATGCTAAA	2	CAGAAAGCCCAGTTAAATTTGAATTTCAAGTAAACAATGAATAATTGTGTATGTAAGAATATCCCATACAATATTTGGGACATACTTATGCTAAAAATTATTCCTTGCTTATCTGAAATTCAAATGTAACTAGGATTCCTGTA
hsa-mir-1302-2	chr1	+	30365	30502	hsa-mir-1302-2-star	hsa-mir-1302-2-star_+1_5	star	0.14		30410	30431	GTAGCATAAATATGTCCCAAGC	1	GGATGCCCAGCTAGTTTGAATTTTAGATAAACAACGAATAATTTCGTAGCATAAATATGTCCCAAGCTTAGTTTGGGACATACTTATGCTAAAAAACATTATTGGTTGTTTATCTGAGATTCAGAATTAAGCATTTTA
hsa-mir-1302-2	chr1	+	30365	30502	hsa-mir-1302-2-star	hsa-mir-1302-2-star	star	0.28		30411	30431	TAGCATAAATATGTCCCAAGC	2	GGATGCCCAGCTAGTTTGAATTTTAGATAAACAACGAATAATTTCGTAGCATAAATATGTCCCAAGCTTAGTTTGGGACATACTTATGCTAAAAAACATTATTGGTTGTTTATCTGAGATTCAGAATTAAGCATTTTA
hsa-mir-1302-2	chr1	+	30365	30502	hsa-mir-1302-2	hsa-mir-1302-2	mature	0.28	Y	30437	30457	TTGGGACATACTTATGCTAAA	2	GGATGCCCAGCTAGTTTGAATTTTAGATAAACAACGAATAATTTCGTAGCATAAATATGTCCCAAGCTTAGTTTGGGACATACTTATGCTAAAAAACATTATTGGTTGTTTATCTGAGATTCAGAATTAAGCATTTTA
hsa-mir-1302-9	chr9	+	30143	30280	hsa-mir-1302-9-star	hsa-mir-1302-9-star_+1_5	star	0.14		30188	30209	GTAGCATAAATATGTCCCAAGC	1	GGATGCCCAGCTAGTTTGAATTTTAGATAAACAACGAATAATTTCGTAGCATAAATATGTCCCAAGCTTAGTTTGGGACATACTTATGCTAAAAAACATTATTGGTTGTTTATCTGAGATTCAGAATTAAGCATTTTA
hsa-mir-1302-9	chr9	+	30143	30280	hsa-mir-1302-9-star	hsa-mir-1302-9-star	star	0.28		30189	30209	TAGCATAAATATGTCCCAAGC	2	GGATGCCCAGCTAGTTTGAATTTTAGATAAACAACGAATAATTTCGTAGCATAAATATGTCCCAAGCTTAGTTTGGGACATACTTATGCTAAAAAACATTATTGGTTGTTTATCTGAGATTCAGAATTAAGCATTTTA
hsa-mir-1302-9	chr9	+	30143	30280	hsa-mir-1302-9	hsa-mir-1302-9	mature	0.28	Y	30215	30235	TTGGGACATACTTATGCTAAA	2	GGATGCCCAGCTAGTTTGAATTTTAGATAAACAACGAATAATTTCGTAGCATAAATATGTCCCAAGCTTAGTTTGGGACATACTTATGCTAAAAAACATTATTGGTTGTTTATCTGAGATTCAGAATTAAGCATTTTA
hsa-mir-1303	chr5	+	154065335	154065420	hsa-mir-1303	hsa-mir-1303_other1	other	0.12		154065347	154065366	TAGCGAGACCTCAACTCTAC	28	GGCTGGGCAACATAGCGAGACCTCAACTCTACAATTTTTTTTTTTTTAAATTTTAGAGACGGGGTCTTGCTCTGTTGCCAGGCTTT
hsa-mir-1303	chr5	+	154065335	154065420	hsa-mir-1303-star	hsa-mir-1303-star_-2_3_+1_5	star	0.17		154065347	154065367	TAGCGAGACCTCAACTCTACA	40	GGCTGGGCAACATAGCGAGACCTCAACTCTACAATTTTTTTTTTTTTAAATTTTAGAGACGGGGTCTTGCTCTGTTGCCAGGCTTT
hsa-mir-1303	chr5	+	154065335	154065420	hsa-mir-1303-star	hsa-mir-1303-star_-1_3_+1_5	star	0.12		154065347	154065368	TAGCGAGACCTCAACTCTACAA	27	GGCTGGGCAACATAGCGAGACCTCAACTCTACAATTTTTTTTTTTTTAAATTTTAGAGACGGGGTCTTGCTCTGTTGCCAGGCTTT
hsa-mir-1303	chr5	+	154065335	154065420	hsa-mir-1303-star	hsa-mir-1303-star	star	0.29		154065348	154065369	AGCGAGACCTCAACTCTACAAT	67	GGCTGGGCAACATAGCGAGACCTCAACTCTACAATTTTTTTTTTTTTAAATTTTAGAGACGGGGTCTTGCTCTGTTGCCAGGCTTT
hsa-mir-1304	chr11	-	93466839	93466929	hsa-mir-1304	hsa-mir-1304	mature	0.04	Y	93466889	93466910	TTTGAGGCTACAGTGAGATGTG	7	AAACACTTGAGCCCAGCGGTTTGAGGCTACAGTGAGATGTGATCCTGCCACATCTCACTGTAGCCTCGAACCCCTGGGCTCAAGTGATTCA
hsa-mir-1304	chr11	-	93466839	93466929	hsa-mir-1304	hsa-mir-1304_other1	other	0.65		93466892	93466913	CGGTTTGAGGCTACAGTGAGAT	112	AAACACTTGAGCCCAGCGGTTTGAGGCTACAGTGAGATGTGATCCTGCCACATCTCACTGTAGCCTCGAACCCCTGGGCTCAAGTGATTCA
hsa-mir-1304	chr11	-	93466839	93466929	hsa-mir-1304	hsa-mir-1304_other2	other	0.12		93466893	93466913	CGGTTTGAGGCTACAGTGAGA	22	AAACACTTGAGCCCAGCGGTTTGAGGCTACAGTGAGATGTGATCCTGCCACATCTCACTGTAGCCTCGAACCCCTGGGCTCAAGTGATTCA
hsa-mir-1305	chr4	+	183090445	183090530	hsa-mir-1305-star	hsa-mir-1305-star	star	0.11		183090459	183090480	TCTACCATTAGTTTTGAATGTT	102	AAGATCCTGCTGTTTCTACCATTAGTTTTGAATGTTTATTGTAAAGATACTTTTCAACTCTAATGGGAGAGACAGCAGGATTCTCC
hsa-mir-1305	chr4	+	183090445	183090530	hsa-mir-1305	hsa-mir-1305	mature	0.3	Y	183090495	183090516	TTTTCAACTCTAATGGGAGAGA	268	AAGATCCTGCTGTTTCTACCATTAGTTTTGAATGTTTATTGTAAAGATACTTTTCAACTCTAATGGGAGAGACAGCAGGATTCTCC
hsa-mir-1305	chr4	+	183090445	183090530	hsa-mir-1305	hsa-mir-1305_-1_5	mature	0.18		183090496	183090516	TTTCAACTCTAATGGGAGAGA	162	AAGATCCTGCTGTTTCTACCATTAGTTTTGAATGTTTATTGTAAAGATACTTTTCAACTCTAATGGGAGAGACAGCAGGATTCTCC
hsa-mir-1306	chr22	+	20073580	20073664	hsa-mir-1306-star	hsa-mir-1306-star	star	0.45		20073594	20073614	CCACCTCCCCTGCAAACGTCC	120	GTGAGCAGTCTCCACCACCTCCCCTGCAAACGTCCAGTGGTGCAGAGGTAATGGACGTTGGCTCTGGTGGTGATGGACAGTCCGA
hsa-mir-1306	chr22	+	20073580	20073664	hsa-mir-1306-star	hsa-mir-1306-star_+1_3	star	0.35		20073594	20073615	CCACCTCCCCTGCAAACGTCCA	93	GTGAGCAGTCTCCACCACCTCCCCTGCAAACGTCCAGTGGTGCAGAGGTAATGGACGTTGGCTCTGGTGGTGATGGACAGTCCGA
hsa-mir-1307	chr10	-	105154009	105154157	hsa-mir-1307	hsa-mir-1307_+1_3	mature	0.34		105154056	105154078	ACTCGGCGTGGCGTCGGTCGTGG	442	CATCAAGACCCAGCTGAGTCACTGTCACTGCCTACCAATCTCGACCGGACCTCGACCGGCTCGTCTGTGTTGCCAATCGACTCGGCGTGGCGTCGGTCGTGGTAGATAGGCGGTCATGCATACGAATTTTCAGCTCTTGTTCTGGTGAC
hsa-mir-1307	chr10	-	105154009	105154157	hsa-mir-1307	hsa-mir-1307	mature	0.01	Y	105154057	105154078	ACTCGGCGTGGCGTCGGTCGTG	16	CATCAAGACCCAGCTGAGTCACTGTCACTGCCTACCAATCTCGACCGGACCTCGACCGGCTCGTCTGTGTTGCCAATCGACTCGGCGTGGCGTCGGTCGTGGTAGATAGGCGGTCATGCATACGAATTTTCAGCTCTTGTTCTGGTGAC
hsa-mir-1307	chr10	-	105154009	105154157	hsa-mir-1307-star	hsa-mir-1307-star_-1_3_+1_5	star	0.2		105154096	105154117	TCGACCGGACCTCGACCGGCTC	263	CATCAAGACCCAGCTGAGTCACTGTCACTGCCTACCAATCTCGACCGGACCTCGACCGGCTCGTCTGTGTTGCCAATCGACTCGGCGTGGCGTCGGTCGTGGTAGATAGGCGGTCATGCATACGAATTTTCAGCTCTTGTTCTGGTGAC
hsa-mir-130b	chr22	+	22007592	22007673	hsa-mir-130b*	hsa-mir-130b*	mature	0.1	Y	22007604	22007624	ACTCTTTCCCTGTTGCACTAC	5066	GGCCTGCCCGACACTCTTTCCCTGTTGCACTACTATAGGCCGCTGGGAAGCAGTGCAATGATGAAAGGGCATCGGTCAGGTC
hsa-mir-130b	chr22	+	22007592	22007673	hsa-mir-130b*	hsa-mir-130b*_+1_3	mature	0.28		22007604	22007625	ACTCTTTCCCTGTTGCACTACT	13426	GGCCTGCCCGACACTCTTTCCCTGTTGCACTACTATAGGCCGCTGGGAAGCAGTGCAATGATGAAAGGGCATCGGTCAGGTC
hsa-mir-130b	chr22	+	22007592	22007673	hsa-mir-130b	hsa-mir-130b	mature	0.45	Y	22007642	22007663	CAGTGCAATGATGAAAGGGCAT	21549	GGCCTGCCCGACACTCTTTCCCTGTTGCACTACTATAGGCCGCTGGGAAGCAGTGCAATGATGAAAGGGCATCGGTCAGGTC
hsa-mir-132	chr17	-	1953201	1953301	hsa-mir-132	hsa-mir-132_+1_3	mature	0.14		1953221	1953243	TAACAGTCTACAGCCATGGTCGC	1827	CCGCCCCCGCGTCTCCAGGGCAACCGTGGCTTTCGATTGTTACTGTGGGAACTGGAGGTAACAGTCTACAGCCATGGTCGCCCCGCAGCACGCCCACGCGC
hsa-mir-132	chr17	-	1953201	1953301	hsa-mir-132	hsa-mir-132	mature	0.45	Y	1953222	1953243	TAACAGTCTACAGCCATGGTCG	5651	CCGCCCCCGCGTCTCCAGGGCAACCGTGGCTTTCGATTGTTACTGTGGGAACTGGAGGTAACAGTCTACAGCCATGGTCGCCCCGCAGCACGCCCACGCGC
hsa-mir-132	chr17	-	1953201	1953301	hsa-mir-132*	hsa-mir-132*	mature	0.12	Y	1953258	1953279	ACCGTGGCTTTCGATTGTTACT	1492	CCGCCCCCGCGTCTCCAGGGCAACCGTGGCTTTCGATTGTTACTGTGGGAACTGGAGGTAACAGTCTACAGCCATGGTCGCCCCGCAGCACGCCCACGCGC
hsa-mir-1323	chr19	+	54175221	54175293	hsa-mir-1323	hsa-mir-1323_-2_3	mature	0.14		54175231	54175250	TCAAAACTGAGGGGCATTTT	1	ACTGAGGTCCTCAAAACTGAGGGGCATTTTCTGTGGTTTGAAAGGAAAGTGCACCCAGTTTTGGGGATGTCAA
hsa-mir-1323	chr19	+	54175221	54175293	hsa-mir-1323	hsa-mir-1323_-1_3	mature	0.14		54175231	54175251	TCAAAACTGAGGGGCATTTTC	1	ACTGAGGTCCTCAAAACTGAGGGGCATTTTCTGTGGTTTGAAAGGAAAGTGCACCCAGTTTTGGGGATGTCAA
hsa-mir-1323	chr19	+	54175221	54175293	hsa-mir-1323	hsa-mir-1323	mature	0.71	Y	54175231	54175252	TCAAAACTGAGGGGCATTTTCT	5	ACTGAGGTCCTCAAAACTGAGGGGCATTTTCTGTGGTTTGAAAGGAAAGTGCACCCAGTTTTGGGGATGTCAA
hsa-mir-133a-1	chr18	-	19405658	19405745	hsa-mir-133a-1	hsa-mir-133a-1_+1_3_-1_5	mature	0.37		19405671	19405692	TTGGTCCCCTTCAACCAGCTGT	6	ACAATGCTTTGCTAGAGCTGGTAAAATGGAACCAAATCGCCTCTTCAATGGATTTGGTCCCCTTCAACCAGCTGTAGCTATGCATTGA
hsa-mir-133a-1	chr18	-	19405658	19405745	hsa-mir-133a-1	hsa-mir-133a-1_+1_3	mature	0.18		19405671	19405693	TTTGGTCCCCTTCAACCAGCTGT	3	ACAATGCTTTGCTAGAGCTGGTAAAATGGAACCAAATCGCCTCTTCAATGGATTTGGTCCCCTTCAACCAGCTGTAGCTATGCATTGA
hsa-mir-133a-1	chr18	-	19405658	19405745	hsa-mir-133a-1	hsa-mir-133a-1	mature	0.06	Y	19405672	19405693	TTTGGTCCCCTTCAACCAGCTG	1	ACAATGCTTTGCTAGAGCTGGTAAAATGGAACCAAATCGCCTCTTCAATGGATTTGGTCCCCTTCAACCAGCTGTAGCTATGCATTGA
hsa-mir-133a-1	chr18	-	19405658	19405745	hsa-mir-133a-1-star	hsa-mir-133a-1-star_-1_3_+1_5	star	0.12		19405709	19405730	AGCTGGTAAAATGGAACCAAAT	2	ACAATGCTTTGCTAGAGCTGGTAAAATGGAACCAAATCGCCTCTTCAATGGATTTGGTCCCCTTCAACCAGCTGTAGCTATGCATTGA
hsa-mir-133a-2	chr20	+	61162118	61162219	hsa-mir-133a-2-star	hsa-mir-133a-2-star_-1_3_+1_5	star	0.12		61162139	61162160	AGCTGGTAAAATGGAACCAAAT	2	GGGAGCCAAATGCTTTGCTAGAGCTGGTAAAATGGAACCAAATCGACTGTCCAATGGATTTGGTCCCCTTCAACCAGCTGTAGCTGTGCATTGATGGCGCCG
hsa-mir-133a-2	chr20	+	61162118	61162219	hsa-mir-133a-2	hsa-mir-133a-2	mature	0.06	Y	61162176	61162197	TTTGGTCCCCTTCAACCAGCTG	1	GGGAGCCAAATGCTTTGCTAGAGCTGGTAAAATGGAACCAAATCGACTGTCCAATGGATTTGGTCCCCTTCAACCAGCTGTAGCTGTGCATTGATGGCGCCG
hsa-mir-133a-2	chr20	+	61162118	61162219	hsa-mir-133a-2	hsa-mir-133a-2_+1_3	mature	0.18		61162176	61162198	TTTGGTCCCCTTCAACCAGCTGT	3	GGGAGCCAAATGCTTTGCTAGAGCTGGTAAAATGGAACCAAATCGACTGTCCAATGGATTTGGTCCCCTTCAACCAGCTGTAGCTGTGCATTGATGGCGCCG
hsa-mir-133a-2	chr20	+	61162118	61162219	hsa-mir-133a-2	hsa-mir-133a-2_+1_3_-1_5	mature	0.37		61162177	61162198	TTGGTCCCCTTCAACCAGCTGT	6	GGGAGCCAAATGCTTTGCTAGAGCTGGTAAAATGGAACCAAATCGACTGTCCAATGGATTTGGTCCCCTTCAACCAGCTGTAGCTGTGCATTGATGGCGCCG
hsa-mir-135a-1	chr3	-	52328234	52328323	hsa-mir-135a-1	hsa-mir-135a-1	mature	0.69	Y	52328285	52328307	TATGGCTTTTTATTCCTATGTGA	716	AGGCCTCGCTGTTCTCTATGGCTTTTTATTCCTATGTGATTCTACTGCTCACTCATATAGGGATTGGAGCCGTGGCGCACGGCGGGGACA
hsa-mir-135a-1	chr3	-	52328234	52328323	hsa-mir-135a-1	hsa-mir-135a-1_-1_3	mature	0.16		52328286	52328307	TATGGCTTTTTATTCCTATGTG	172	AGGCCTCGCTGTTCTCTATGGCTTTTTATTCCTATGTGATTCTACTGCTCACTCATATAGGGATTGGAGCCGTGGCGCACGGCGGGGACA
hsa-mir-135a-2	chr12	+	97957589	97957688	hsa-mir-135a-2	hsa-mir-135a-2_-1_3	mature	0.17		97957611	97957632	TATGGCTTTTTATTCCTATGTG	172	AGATAAATTCACTCTAGTGCTTTATGGCTTTTTATTCCTATGTGATAGTAATAAAGTCTCATGTAGGGATGGAAGCCATGAAATACATTGTGAAAAATCA
hsa-mir-135a-2	chr12	+	97957589	97957688	hsa-mir-135a-2	hsa-mir-135a-2	mature	0.7	Y	97957611	97957633	TATGGCTTTTTATTCCTATGTGA	716	AGATAAATTCACTCTAGTGCTTTATGGCTTTTTATTCCTATGTGATAGTAATAAAGTCTCATGTAGGGATGGAAGCCATGAAATACATTGTGAAAAATCA
hsa-mir-135b	chr1	-	205417429	205417525	hsa-mir-135b*	hsa-mir-135b*	mature	0	Y	205417450	205417471	ATGTAGGGCTAAAAGCCATGGG	50	CACTCTGCTGTGGCCTATGGCTTTTCATTCCTATGTGATTGCTGTCCCAAACTCATGTAGGGCTAAAAGCCATGGGCTACAGTGAGGGGCGAGCTCC
hsa-mir-135b	chr1	-	205417429	205417525	hsa-mir-135b	hsa-mir-135b	mature	0.57	Y	205417488	205417510	TATGGCTTTTCATTCCTATGTGA	6152	CACTCTGCTGTGGCCTATGGCTTTTCATTCCTATGTGATTGCTGTCCCAAACTCATGTAGGGCTAAAAGCCATGGGCTACAGTGAGGGGCGAGCTCC
hsa-mir-135b	chr1	-	205417429	205417525	hsa-mir-135b	hsa-mir-135b_-1_3	mature	0.29		205417489	205417510	TATGGCTTTTCATTCCTATGTG	3118	CACTCTGCTGTGGCCTATGGCTTTTCATTCCTATGTGATTGCTGTCCCAAACTCATGTAGGGCTAAAAGCCATGGGCTACAGTGAGGGGCGAGCTCC
hsa-mir-138-2	chr16	+	56892429	56892512	hsa-mir-138-2	hsa-mir-138-2_-3_3	mature	0.28		56892438	56892457	AGCTGGTGTTGTGAATCAGG	2	CGTTGCTGCAGCTGGTGTTGTGAATCAGGCCGACGAGCAGCGCATCCTCTTACCCGGCTATTTCACGACACCAGGGTTGCATCA
hsa-mir-138-2	chr16	+	56892429	56892512	hsa-mir-138-2	hsa-mir-138-2	mature	0.28	Y	56892438	56892460	AGCTGGTGTTGTGAATCAGGCCG	2	CGTTGCTGCAGCTGGTGTTGTGAATCAGGCCGACGAGCAGCGCATCCTCTTACCCGGCTATTTCACGACACCAGGGTTGCATCA
hsa-mir-138-2	chr16	+	56892429	56892512	hsa-mir-138-2	hsa-mir-138-2_+1_3	mature	0.42		56892438	56892461	AGCTGGTGTTGTGAATCAGGCCGA	3	CGTTGCTGCAGCTGGTGTTGTGAATCAGGCCGACGAGCAGCGCATCCTCTTACCCGGCTATTTCACGACACCAGGGTTGCATCA
hsa-mir-139	chr11	-	72326106	72326173	hsa-mir-139-5p	hsa-mir-139-5p_+1_3	mature	0.53		72326145	72326167	TCTACAGTGCACGTGTCTCCAGT	163	GTGTATTCTACAGTGCACGTGTCTCCAGTGTGGCTCGGAGGCTGGAGACGCGGCCCTGTTGGAGTAAC
hsa-mir-139	chr11	-	72326106	72326173	hsa-mir-139-5p	hsa-mir-139-5p	mature	0.21	Y	72326146	72326167	TCTACAGTGCACGTGTCTCCAG	67	GTGTATTCTACAGTGCACGTGTCTCCAGTGTGGCTCGGAGGCTGGAGACGCGGCCCTGTTGGAGTAAC
hsa-mir-139	chr11	-	72326106	72326173	hsa-mir-139-5p	hsa-mir-139-5p_-1_3	mature	0.13		72326147	72326167	TCTACAGTGCACGTGTCTCCA	42	GTGTATTCTACAGTGCACGTGTCTCCAGTGTGGCTCGGAGGCTGGAGACGCGGCCCTGTTGGAGTAAC
hsa-mir-140	chr16	+	69966983	69967082	hsa-mir-140-5p	hsa-mir-140-5p	mature	0.38	Y	69967005	69967026	CAGTGGTTTTACCCTATGGTAG	1929	TGTGTCTCTCTCTGTGTCCTGCCAGTGGTTTTACCCTATGGTAGGTTACGTCATGCTGTTCTACCACAGGGTAGAACCACGGACAGGATACCGGGGCACC
hsa-mir-140	chr16	+	69966983	69967082	hsa-mir-140-3p	hsa-mir-140-3p	mature	0.01	Y	69967044	69967064	TACCACAGGGTAGAACCACGG	72	TGTGTCTCTCTCTGTGTCCTGCCAGTGGTTTTACCCTATGGTAGGTTACGTCATGCTGTTCTACCACAGGGTAGAACCACGGACAGGATACCGGGGCACC
hsa-mir-140	chr16	+	69966983	69967082	hsa-mir-140-3p	hsa-mir-140-3p_+2_3	mature	0.12		69967044	69967066	TACCACAGGGTAGAACCACGGAC	638	TGTGTCTCTCTCTGTGTCCTGCCAGTGGTTTTACCCTATGGTAGGTTACGTCATGCTGTTCTACCACAGGGTAGAACCACGGACAGGATACCGGGGCACC
hsa-mir-140	chr16	+	69966983	69967082	hsa-mir-140-3p	hsa-mir-140-3p_+2_3_-1_5	mature	0.11		69967045	69967066	ACCACAGGGTAGAACCACGGAC	570	TGTGTCTCTCTCTGTGTCCTGCCAGTGGTTTTACCCTATGGTAGGTTACGTCATGCTGTTCTACCACAGGGTAGAACCACGGACAGGATACCGGGGCACC
hsa-mir-141	chr12	+	7073259	7073353	hsa-mir-141*	hsa-mir-141*	mature	0.01	Y	7073275	7073296	CATCTTCCAGTACAGTGTTGGA	786	CGGCCGGCCCTGGGTCCATCTTCCAGTACAGTGTTGGATGGTCTAATTGTGAAGCTCCTAACACTGTCTGGTAAAGATGGCTCCCGGGTGGGTTC
hsa-mir-141	chr12	+	7073259	7073353	hsa-mir-141	hsa-mir-141_-1_3	mature	0.3		7073317	7073337	TAACACTGTCTGGTAAAGATG	22806	CGGCCGGCCCTGGGTCCATCTTCCAGTACAGTGTTGGATGGTCTAATTGTGAAGCTCCTAACACTGTCTGGTAAAGATGGCTCCCGGGTGGGTTC
hsa-mir-141	chr12	+	7073259	7073353	hsa-mir-141	hsa-mir-141	mature	0.11	Y	7073317	7073338	TAACACTGTCTGGTAAAGATGG	8522	CGGCCGGCCCTGGGTCCATCTTCCAGTACAGTGTTGGATGGTCTAATTGTGAAGCTCCTAACACTGTCTGGTAAAGATGGCTCCCGGGTGGGTTC
hsa-mir-141	chr12	+	7073259	7073353	hsa-mir-141	hsa-mir-141_+1_3	mature	0.4		7073317	7073339	TAACACTGTCTGGTAAAGATGGC	29931	CGGCCGGCCCTGGGTCCATCTTCCAGTACAGTGTTGGATGGTCTAATTGTGAAGCTCCTAACACTGTCTGGTAAAGATGGCTCCCGGGTGGGTTC
hsa-mir-142	chr17	-	56408592	56408678	hsa-mir-142-3p	hsa-mir-142-3p_-1_5	mature	0.22		56408605	56408626	GTAGTGTTTCCTACTTTATGGA	3065	GACAGTGCAGTCACCCATAAAGTAGAAAGCACTACTAACAGCACTGGAGGGTGTAGTGTTTCCTACTTTATGGATGAGTGTACTGTG
hsa-mir-142	chr17	-	56408592	56408678	hsa-mir-142-3p	hsa-mir-142-3p	mature	0.26	Y	56408605	56408627	TGTAGTGTTTCCTACTTTATGGA	3665	GACAGTGCAGTCACCCATAAAGTAGAAAGCACTACTAACAGCACTGGAGGGTGTAGTGTTTCCTACTTTATGGATGAGTGTACTGTG
hsa-mir-142	chr17	-	56408592	56408678	hsa-mir-142-5p	hsa-mir-142-5p	mature	0.06	Y	56408643	56408663	CATAAAGTAGAAAGCACTACT	830	GACAGTGCAGTCACCCATAAAGTAGAAAGCACTACTAACAGCACTGGAGGGTGTAGTGTTTCCTACTTTATGGATGAGTGTACTGTG
hsa-mir-142	chr17	-	56408592	56408678	hsa-mir-142-5p	hsa-mir-142-5p_-1_3_+2_5	mature	0.11		56408644	56408665	CCCATAAAGTAGAAAGCACTAC	1531	GACAGTGCAGTCACCCATAAAGTAGAAAGCACTACTAACAGCACTGGAGGGTGTAGTGTTTCCTACTTTATGGATGAGTGTACTGTG
hsa-mir-143	chr5	+	148808480	148808585	hsa-mir-143*	hsa-mir-143*	mature	0	Y	148808506	148808527	GGTGCAGTGCTGCATCTCTGGT	2	GCGCAGCGCCCTGTCTCCCAGCCTGAGGTGCAGTGCTGCATCTCTGGTCAGTTGGGAGTCTGAGATGAAGCACTGTAGCTCAGGAAGAGAGAAGTTGTTCTGCAGC
hsa-mir-143	chr5	+	148808480	148808585	hsa-mir-143	hsa-mir-143	mature	0.59	Y	148808540	148808560	TGAGATGAAGCACTGTAGCTC	572	GCGCAGCGCCCTGTCTCCCAGCCTGAGGTGCAGTGCTGCATCTCTGGTCAGTTGGGAGTCTGAGATGAAGCACTGTAGCTCAGGAAGAGAGAAGTTGTTCTGCAGC
hsa-mir-143	chr5	+	148808480	148808585	hsa-mir-143	hsa-mir-143_+1_3	mature	0.29		148808540	148808561	TGAGATGAAGCACTGTAGCTCA	288	GCGCAGCGCCCTGTCTCCCAGCCTGAGGTGCAGTGCTGCATCTCTGGTCAGTTGGGAGTCTGAGATGAAGCACTGTAGCTCAGGAAGAGAGAAGTTGTTCTGCAGC
hsa-mir-144	chr17	-	27188550	27188635	hsa-mir-144	hsa-mir-144_+1_3	mature	0.1		27188564	27188584	TACAGTATAGATGATGTACTA	47	TGGGGCCCTGGCTGGGATATCATCATATACTGTAAGTTTGCGATGAGACACTACAGTATAGATGATGTACTAGTCCGGGCACCCCC
hsa-mir-144	chr17	-	27188550	27188635	hsa-mir-144	hsa-mir-144	mature	0.37	Y	27188565	27188584	TACAGTATAGATGATGTACT	160	TGGGGCCCTGGCTGGGATATCATCATATACTGTAAGTTTGCGATGAGACACTACAGTATAGATGATGTACTAGTCCGGGCACCCCC
hsa-mir-144	chr17	-	27188550	27188635	hsa-mir-144*	hsa-mir-144*_+1_3	mature	0.32		27188599	27188621	GGATATCATCATATACTGTAAGT	138	TGGGGCCCTGGCTGGGATATCATCATATACTGTAAGTTTGCGATGAGACACTACAGTATAGATGATGTACTAGTCCGGGCACCCCC
hsa-mir-144	chr17	-	27188550	27188635	hsa-mir-144*	hsa-mir-144*	mature	0.01	Y	27188600	27188621	GGATATCATCATATACTGTAAG	5	TGGGGCCCTGGCTGGGATATCATCATATACTGTAAGTTTGCGATGAGACACTACAGTATAGATGATGTACTAGTCCGGGCACCCCC
hsa-mir-145	chr5	+	148810208	148810295	hsa-mir-145	hsa-mir-145	mature	0.25	Y	148810223	148810245	GTCCAGTTTTCCCAGGAATCCCT	5	CACCTTGTCCTCACGGTCCAGTTTTCCCAGGAATCCCTTAGATGCTAAGATGGGGATTCCTGGAAATACTGTTCTTGAGGTCATGGTT
hsa-mir-145	chr5	+	148810208	148810295	hsa-mir-145	hsa-mir-145_+1_3	mature	0.15		148810223	148810246	GTCCAGTTTTCCCAGGAATCCCTT	3	CACCTTGTCCTCACGGTCCAGTTTTCCCAGGAATCCCTTAGATGCTAAGATGGGGATTCCTGGAAATACTGTTCTTGAGGTCATGGTT
hsa-mir-145	chr5	+	148810208	148810295	hsa-mir-145*	hsa-mir-145*_-1_3	mature	0.15		148810261	148810281	GGATTCCTGGAAATACTGTTC	3	CACCTTGTCCTCACGGTCCAGTTTTCCCAGGAATCCCTTAGATGCTAAGATGGGGATTCCTGGAAATACTGTTCTTGAGGTCATGGTT
hsa-mir-145	chr5	+	148810208	148810295	hsa-mir-145*	hsa-mir-145*_+1_3_-2_5	mature	0.3		148810263	148810283	ATTCCTGGAAATACTGTTCTT	6	CACCTTGTCCTCACGGTCCAGTTTTCCCAGGAATCCCTTAGATGCTAAGATGGGGATTCCTGGAAATACTGTTCTTGAGGTCATGGTT
hsa-mir-1468	chrX	-	63005881	63005966	hsa-mir-1468	hsa-mir-1468_+1_3	mature	0.64		63005933	63005954	CTCCGTTTGCCTGTTTCGCTGA	55	GGTGGGTGGTTTCTCCGTTTGCCTGTTTCGCTGATGTGCATTCAACTCATTCTCAGCAAAATAAGCAAATGGAAAATTCGTCCATC
hsa-mir-1468	chrX	-	63005881	63005966	hsa-mir-1468	hsa-mir-1468	mature	0.05	Y	63005934	63005954	CTCCGTTTGCCTGTTTCGCTG	5	GGTGGGTGGTTTCTCCGTTTGCCTGTTTCGCTGATGTGCATTCAACTCATTCTCAGCAAAATAAGCAAATGGAAAATTCGTCCATC
hsa-mir-146a	chr5	+	159912358	159912456	hsa-mir-146a	hsa-mir-146a	mature	0.69	Y	159912378	159912399	TGAGAACTGAATTCCATGGGTT	2137	CCGATGTGTATCCTCAGCTTTGAGAACTGAATTCCATGGGTTGTGTCAGTGTCAGACCTCTGAAATTCAGTTCTTCAGCTGGGATATCTCTGTCATCGT
hsa-mir-146a	chr5	+	159912358	159912456	hsa-mir-146a	hsa-mir-146a_+1_3	mature	0.16		159912378	159912400	TGAGAACTGAATTCCATGGGTTG	497	CCGATGTGTATCCTCAGCTTTGAGAACTGAATTCCATGGGTTGTGTCAGTGTCAGACCTCTGAAATTCAGTTCTTCAGCTGGGATATCTCTGTCATCGT
hsa-mir-146a	chr5	+	159912358	159912456	hsa-mir-146a*	hsa-mir-146a*	mature	0	Y	159912414	159912435	CCTCTGAAATTCAGTTCTTCAG	12	CCGATGTGTATCCTCAGCTTTGAGAACTGAATTCCATGGGTTGTGTCAGTGTCAGACCTCTGAAATTCAGTTCTTCAGCTGGGATATCTCTGTCATCGT
hsa-mir-146b	chr10	+	104196268	104196340	hsa-mir-146b-5p	hsa-mir-146b-5p	mature	0.17	Y	104196276	104196297	TGAGAACTGAATTCCATAGGCT	385	CCTGGCACTGAGAACTGAATTCCATAGGCTGTGAGCTCTAGCAATGCCCTGTGGACTCAGTTCTGGTGCCCGG
hsa-mir-146b	chr10	+	104196268	104196340	hsa-mir-146b-5p	hsa-mir-146b-5p_+1_3	mature	0.21		104196276	104196298	TGAGAACTGAATTCCATAGGCTG	488	CCTGGCACTGAGAACTGAATTCCATAGGCTGTGAGCTCTAGCAATGCCCTGTGGACTCAGTTCTGGTGCCCGG
hsa-mir-146b	chr10	+	104196268	104196340	hsa-mir-146b-5p	hsa-mir-146b-5p_+2_3	mature	0.54		104196276	104196299	TGAGAACTGAATTCCATAGGCTGT	1220	CCTGGCACTGAGAACTGAATTCCATAGGCTGTGAGCTCTAGCAATGCCCTGTGGACTCAGTTCTGGTGCCCGG
hsa-mir-147b	chr15	+	45725247	45725326	hsa-mir-147b	hsa-mir-147b_other1	other	0.28		45725258	45725279	TGGAAACATTTCTGCACAAACT	29	TATAAATCTAGTGGAAACATTTCTGCACAAACTAGATTCTGGACACCAGTGTGCGGAAATGCTTCTGCTACATTTTTAGG
hsa-mir-148a	chr7	-	25989538	25989605	hsa-mir-148a	hsa-mir-148a	mature	0.82	Y	25989541	25989562	TCAGTGCACTACAGAACTTTGT	20524	GAGGCAAAGTTCTGAGACACTCCGACTCTGAGTATGATAGAAGTCAGTGCACTACAGAACTTTGTCTC
hsa-mir-148a	chr7	-	25989538	25989605	hsa-mir-148a*	hsa-mir-148a*	mature	0	Y	25989579	25989600	AAAGTTCTGAGACACTCCGACT	33	GAGGCAAAGTTCTGAGACACTCCGACTCTGAGTATGATAGAAGTCAGTGCACTACAGAACTTTGTCTC
hsa-mir-148b	chr12	+	54730999	54731097	hsa-mir-148b*	hsa-mir-148b*	mature	0	Y	54731023	54731044	AAGTTCTGTTATACACTCAGGC	2	CAAGCACGATTAGCATTTGAGGTGAAGTTCTGTTATACACTCAGGCTGTGGCTCTCTGAAAGTCAGTGCATCACAGAACTTTGTCTCGAAAGCTTTCTA
hsa-mir-148b	chr12	+	54730999	54731097	hsa-mir-148b	hsa-mir-148b	mature	0.7	Y	54731061	54731082	TCAGTGCATCACAGAACTTTGT	26028	CAAGCACGATTAGCATTTGAGGTGAAGTTCTGTTATACACTCAGGCTGTGGCTCTCTGAAAGTCAGTGCATCACAGAACTTTGTCTCGAAAGCTTTCTA
hsa-mir-148b	chr12	+	54730999	54731097	hsa-mir-148b	hsa-mir-148b_+1_3	mature	0.19		54731061	54731083	TCAGTGCATCACAGAACTTTGTC	7084	CAAGCACGATTAGCATTTGAGGTGAAGTTCTGTTATACACTCAGGCTGTGGCTCTCTGAAAGTCAGTGCATCACAGAACTTTGTCTCGAAAGCTTTCTA
hsa-mir-149	chr2	+	241395417	241395505	hsa-mir-149	hsa-mir-149_-3_3	mature	0.1		241395431	241395450	TCTGGCTCCGTGTCTTCACT	1208	GCCGGCGCCCGAGCTCTGGCTCCGTGTCTTCACTCCCGTGCTTGTCCGAGGAGGGAGGGAGGGACGGGGGCTGTGCTGGGGCAGCTGGA
hsa-mir-149	chr2	+	241395417	241395505	hsa-mir-149	hsa-mir-149_-2_3	mature	0.27		241395431	241395451	TCTGGCTCCGTGTCTTCACTC	3260	GCCGGCGCCCGAGCTCTGGCTCCGTGTCTTCACTCCCGTGCTTGTCCGAGGAGGGAGGGAGGGACGGGGGCTGTGCTGGGGCAGCTGGA
hsa-mir-149	chr2	+	241395417	241395505	hsa-mir-149	hsa-mir-149_-1_3	mature	0.16		241395431	241395452	TCTGGCTCCGTGTCTTCACTCC	1986	GCCGGCGCCCGAGCTCTGGCTCCGTGTCTTCACTCCCGTGCTTGTCCGAGGAGGGAGGGAGGGACGGGGGCTGTGCTGGGGCAGCTGGA
hsa-mir-149	chr2	+	241395417	241395505	hsa-mir-149	hsa-mir-149	mature	0.32	Y	241395431	241395453	TCTGGCTCCGTGTCTTCACTCCC	3817	GCCGGCGCCCGAGCTCTGGCTCCGTGTCTTCACTCCCGTGCTTGTCCGAGGAGGGAGGGAGGGACGGGGGCTGTGCTGGGGCAGCTGGA
hsa-mir-149	chr2	+	241395417	241395505	hsa-mir-149*	hsa-mir-149*	mature	0	Y	241395472	241395492	AGGGAGGGACGGGGGCTGTGC	1	GCCGGCGCCCGAGCTCTGGCTCCGTGTCTTCACTCCCGTGCTTGTCCGAGGAGGGAGGGAGGGACGGGGGCTGTGCTGGGGCAGCTGGA
hsa-mir-150	chr19	-	50004041	50004124	hsa-mir-150	hsa-mir-150	mature	0.76	Y	50004088	50004109	TCTCCCAACCCTTGTACCAGTG	43	CTCCCCATGGCCCTGTCTCCCAACCCTTGTACCAGTGCTGGGCTCAGACCCTGGTACAGGCCTGGGGGACAGGGACCTGGGGAC
hsa-mir-150	chr19	-	50004041	50004124	hsa-mir-150	hsa-mir-150_-1_3	mature	0.12		50004089	50004109	TCTCCCAACCCTTGTACCAGT	7	CTCCCCATGGCCCTGTCTCCCAACCCTTGTACCAGTGCTGGGCTCAGACCCTGGTACAGGCCTGGGGGACAGGGACCTGGGGAC
hsa-mir-151	chr8	-	141742662	141742751	hsa-mir-151-3p	hsa-mir-151-3p	mature	0.16	Y	141742685	141742705	CTAGACTGAAGCTCCTTGAGG	24474	TTTCCTGCCCTCGAGGAGCTCACAGTCTAGTATGTCTCATCCCCTACTAGACTGAAGCTCCTTGAGGACAGGGATGGTCATACTCACCTC
hsa-mir-151	chr8	-	141742662	141742751	hsa-mir-151-5p	hsa-mir-151-5p	mature	0.39	Y	141742721	141742741	TCGAGGAGCTCACAGTCTAGT	60694	TTTCCTGCCCTCGAGGAGCTCACAGTCTAGTATGTCTCATCCCCTACTAGACTGAAGCTCCTTGAGGACAGGGATGGTCATACTCACCTC
hsa-mir-152	chr17	-	46114526	46114612	hsa-mir-152	hsa-mir-152_+2_3	mature	0.16		46114537	46114559	TCAGTGCATGACAGAACTTGGGC	3303	TGTCCCCCCCGGCCCAGGTTCTGTGATACACTCCGACTCGGGCTCTGGAGCAGTCAGTGCATGACAGAACTTGGGCCCGGAAGGACC
hsa-mir-152	chr17	-	46114526	46114612	hsa-mir-152	hsa-mir-152_+1_3	mature	0.42		46114538	46114559	TCAGTGCATGACAGAACTTGGG	8386	TGTCCCCCCCGGCCCAGGTTCTGTGATACACTCCGACTCGGGCTCTGGAGCAGTCAGTGCATGACAGAACTTGGGCCCGGAAGGACC
hsa-mir-152	chr17	-	46114526	46114612	hsa-mir-152	hsa-mir-152	mature	0.39	Y	46114539	46114559	TCAGTGCATGACAGAACTTGG	7816	TGTCCCCCCCGGCCCAGGTTCTGTGATACACTCCGACTCGGGCTCTGGAGCAGTCAGTGCATGACAGAACTTGGGCCCGGAAGGACC
hsa-mir-153-1	chr2	-	220158832	220158921	hsa-mir-153-1	hsa-mir-153-1_+2_3	mature	0.43		220158845	220158868	TTGCATAGTCACAAAAGTGATCAT	279	CTCACAGCTGCCAGTGTCATTTTTGTGATCTGCAGCTAGTATTCTCACTCCAGTTGCATAGTCACAAAAGTGATCATTGGCAGGTGTGGC
hsa-mir-153-1	chr2	-	220158832	220158921	hsa-mir-153-1	hsa-mir-153-1	mature	0.19	Y	220158847	220158868	TTGCATAGTCACAAAAGTGATC	122	CTCACAGCTGCCAGTGTCATTTTTGTGATCTGCAGCTAGTATTCTCACTCCAGTTGCATAGTCACAAAAGTGATCATTGGCAGGTGTGGC
hsa-mir-153-1	chr2	-	220158832	220158921	hsa-mir-153-1	hsa-mir-153-1_-1_3	mature	0.14		220158848	220158868	TTGCATAGTCACAAAAGTGAT	90	CTCACAGCTGCCAGTGTCATTTTTGTGATCTGCAGCTAGTATTCTCACTCCAGTTGCATAGTCACAAAAGTGATCATTGGCAGGTGTGGC
hsa-mir-153-2	chr7	-	157367027	157367113	hsa-mir-153-2	hsa-mir-153-2_+2_3	mature	0.4		157367038	157367061	TTGCATAGTCACAAAAGTGATCAT	279	AGCGGTGGCCAGTGTCATTTTTGTGATGTTGCAGCTAGTAATATGAGCCCAGTTGCATAGTCACAAAAGTGATCATTGGAAACTGTG
hsa-mir-153-2	chr7	-	157367027	157367113	hsa-mir-153-2	hsa-mir-153-2	mature	0.17	Y	157367040	157367061	TTGCATAGTCACAAAAGTGATC	122	AGCGGTGGCCAGTGTCATTTTTGTGATGTTGCAGCTAGTAATATGAGCCCAGTTGCATAGTCACAAAAGTGATCATTGGAAACTGTG
hsa-mir-153-2	chr7	-	157367027	157367113	hsa-mir-153-2	hsa-mir-153-2_-1_3	mature	0.13		157367041	157367061	TTGCATAGTCACAAAAGTGAT	90	AGCGGTGGCCAGTGTCATTTTTGTGATGTTGCAGCTAGTAATATGAGCCCAGTTGCATAGTCACAAAAGTGATCATTGGAAACTGTG
hsa-mir-153-2	chr7	-	157367027	157367113	hsa-mir-153-2-star	hsa-mir-153-2-star_-1_3_+2_5	star	0.1		157367079	157367100	GTCATTTTTGTGATGTTGCAGC	75	AGCGGTGGCCAGTGTCATTTTTGTGATGTTGCAGCTAGTAATATGAGCCCAGTTGCATAGTCACAAAAGTGATCATTGGAAACTGTG
hsa-mir-1537	chr1	-	236016299	236016359	hsa-mir-1537	hsa-mir-1537_-1_5	mature	0.33		236016299	236016319	AAACCGTCTAGTTACAGTTGT	84	ACAGCTGTAATTAGTCAGTTTTCTGTCCTGTCCACACAGAAAACCGTCTAGTTACAGTTGT
hsa-mir-1537	chr1	-	236016299	236016359	hsa-mir-1537	hsa-mir-1537	mature	0.44	Y	236016299	236016320	AAAACCGTCTAGTTACAGTTGT	111	ACAGCTGTAATTAGTCAGTTTTCTGTCCTGTCCACACAGAAAACCGTCTAGTTACAGTTGT
hsa-mir-1538	chr16	-	69599710	69599770	hsa-mir-1538	hsa-mir-1538_-1_3	mature	0.3		69599711	69599732	CGGCCCGGGCTGCTGCTGTTCC	3	GGGAACAGCAGCAACATGGGCCTCGCTTCCTGCCGGCGCGGCCCGGGCTGCTGCTGTTCCT
hsa-mir-1538	chr16	-	69599710	69599770	hsa-mir-1538-star	hsa-mir-1538-star_-1_5	star	0.1		69599746	69599767	AACAGCAGCAACATGGGCCTCG	1	GGGAACAGCAGCAACATGGGCCTCGCTTCCTGCCGGCGCGGCCCGGGCTGCTGCTGTTCCT
hsa-mir-1538	chr16	-	69599710	69599770	hsa-mir-1538-star	hsa-mir-1538-star_-2_3_-1_5	star	0.1		69599748	69599767	AACAGCAGCAACATGGGCCT	1	GGGAACAGCAGCAACATGGGCCTCGCTTCCTGCCGGCGCGGCCCGGGCTGCTGCTGTTCCT
hsa-mir-154	chr14	+	101526091	101526174	hsa-mir-154*	hsa-mir-154*	mature	0.92	Y	101526141	101526162	AATCATACACGGTTGACCTATT	23	GTGGTACTTGAAGATAGGTTATCCGTGTTGCCTTCGCTTTATTTGTGACGAATCATACACGGTTGACCTATTTTTCAGTACCAA
hsa-mir-155	chr21	+	26946291	26946355	hsa-mir-155	hsa-mir-155_-1_3	mature	0.1		26946294	26946315	TTAATGCTAATCGTGATAGGGG	1171	CTGTTAATGCTAATCGTGATAGGGGTTTTTGCCTCCAACTGACTCCTACATATTAGCATTAACAG
hsa-mir-155	chr21	+	26946291	26946355	hsa-mir-155	hsa-mir-155	mature	0.3	Y	26946294	26946316	TTAATGCTAATCGTGATAGGGGT	3479	CTGTTAATGCTAATCGTGATAGGGGTTTTTGCCTCCAACTGACTCCTACATATTAGCATTAACAG
hsa-mir-155	chr21	+	26946291	26946355	hsa-mir-155	hsa-mir-155_+1_3	mature	0.16		26946294	26946317	TTAATGCTAATCGTGATAGGGGTT	1841	CTGTTAATGCTAATCGTGATAGGGGTTTTTGCCTCCAACTGACTCCTACATATTAGCATTAACAG
hsa-mir-155	chr21	+	26946291	26946355	hsa-mir-155*	hsa-mir-155*	mature	0	Y	26946333	26946354	CTCCTACATATTAGCATTAACA	17	CTGTTAATGCTAATCGTGATAGGGGTTTTTGCCTCCAACTGACTCCTACATATTAGCATTAACAG
hsa-mir-15a	chr13	-	50623254	50623336	hsa-mir-15a*	hsa-mir-15a*	mature	0	Y	50623265	50623286	CAGGCCATATTGTGCTGCCTCA	20	CCTTGGAGTAAAGTAGCAGCACATAATGGTTTGTGGATTTTGAAAAGGTGCAGGCCATATTGTGCTGCCTCAAAAATACAAGG
hsa-mir-15a	chr13	-	50623254	50623336	hsa-mir-15a	hsa-mir-15a	mature	0.1	Y	50623302	50623323	TAGCAGCACATAATGGTTTGTG	2462	CCTTGGAGTAAAGTAGCAGCACATAATGGTTTGTGGATTTTGAAAAGGTGCAGGCCATATTGTGCTGCCTCAAAAATACAAGG
hsa-mir-15a	chr13	-	50623254	50623336	hsa-mir-15a	hsa-mir-15a_-1_3	mature	0.68		50623303	50623323	TAGCAGCACATAATGGTTTGT	15939	CCTTGGAGTAAAGTAGCAGCACATAATGGTTTGTGGATTTTGAAAAGGTGCAGGCCATATTGTGCTGCCTCAAAAATACAAGG
hsa-mir-15b	chr3	+	160122375	160122472	hsa-mir-15b	hsa-mir-15b_-1_3	mature	0.61		160122394	160122414	TAGCAGCACATCATGGTTTAC	51927	TTGAGGCCTTAAAGTACTGTAGCAGCACATCATGGTTTACATGCTACAGTCAAGATGCGAATCATTATTTGCTGCTCTAGAAATTTAAGGAAATTCAT
hsa-mir-15b	chr3	+	160122375	160122472	hsa-mir-15b	hsa-mir-15b	mature	0.21	Y	160122394	160122415	TAGCAGCACATCATGGTTTACA	18476	TTGAGGCCTTAAAGTACTGTAGCAGCACATCATGGTTTACATGCTACAGTCAAGATGCGAATCATTATTTGCTGCTCTAGAAATTTAAGGAAATTCAT
hsa-mir-15b	chr3	+	160122375	160122472	hsa-mir-15b*	hsa-mir-15b*	mature	0.03	Y	160122432	160122453	CGAATCATTATTTGCTGCTCTA	3033	TTGAGGCCTTAAAGTACTGTAGCAGCACATCATGGTTTACATGCTACAGTCAAGATGCGAATCATTATTTGCTGCTCTAGAAATTTAAGGAAATTCAT
hsa-mir-16-1	chr13	-	50623108	50623196	hsa-mir-16-1	hsa-mir-16-1_+1_3	mature	0.17		50623161	50623183	TAGCAGCACGTAAATATTGGCGT	181252	GTCAGCAGTGCCTTAGCAGCACGTAAATATTGGCGTTAAGATTCTAAAATTATCTCCAGTATTAACTGTGCTGCTGAAGTAAGGTTGAC
hsa-mir-16-1	chr13	-	50623108	50623196	hsa-mir-16-1	hsa-mir-16-1	mature	0.65	Y	50623162	50623183	TAGCAGCACGTAAATATTGGCG	672375	GTCAGCAGTGCCTTAGCAGCACGTAAATATTGGCGTTAAGATTCTAAAATTATCTCCAGTATTAACTGTGCTGCTGAAGTAAGGTTGAC
hsa-mir-16-1	chr13	-	50623108	50623196	hsa-mir-16-1	hsa-mir-16-1_-1_3	mature	0.13		50623163	50623183	TAGCAGCACGTAAATATTGGC	140351	GTCAGCAGTGCCTTAGCAGCACGTAAATATTGGCGTTAAGATTCTAAAATTATCTCCAGTATTAACTGTGCTGCTGAAGTAAGGTTGAC
hsa-mir-16-2	chr3	+	160122532	160122612	hsa-mir-16-2	hsa-mir-16-2_-1_3	mature	0.13		160122541	160122561	TAGCAGCACGTAAATATTGGC	140351	GTTCCACTCTAGCAGCACGTAAATATTGGCGTAGTGAAATATATATTAAACACCAATATTACTGTGCTGCTTTAGTGTGAC
hsa-mir-16-2	chr3	+	160122532	160122612	hsa-mir-16-2	hsa-mir-16-2	mature	0.64	Y	160122541	160122562	TAGCAGCACGTAAATATTGGCG	672375	GTTCCACTCTAGCAGCACGTAAATATTGGCGTAGTGAAATATATATTAAACACCAATATTACTGTGCTGCTTTAGTGTGAC
hsa-mir-16-2	chr3	+	160122532	160122612	hsa-mir-16-2	hsa-mir-16-2_+1_3	mature	0.17		160122541	160122563	TAGCAGCACGTAAATATTGGCGT	181252	GTTCCACTCTAGCAGCACGTAAATATTGGCGTAGTGAAATATATATTAAACACCAATATTACTGTGCTGCTTTAGTGTGAC
hsa-mir-17	chr13	+	92002858	92002941	hsa-mir-17	hsa-mir-17	mature	0.63	Y	92002871	92002893	CAAAGTGCTTACAGTGCAGGTAG	48163	GTCAGAATAATGTCAAAGTGCTTACAGTGCAGGTAGTGATATGTGCATCTACTGCAGTGAAGGCACTTGTAGCATTATGGTGAC
hsa-mir-17	chr13	+	92002858	92002941	hsa-mir-17	hsa-mir-17_+1_3	mature	0.13		92002871	92002894	CAAAGTGCTTACAGTGCAGGTAGT	10146	GTCAGAATAATGTCAAAGTGCTTACAGTGCAGGTAGTGATATGTGCATCTACTGCAGTGAAGGCACTTGTAGCATTATGGTGAC
hsa-mir-17	chr13	+	92002858	92002941	hsa-mir-17*	hsa-mir-17*	mature	0.06	Y	92002908	92002929	ACTGCAGTGAAGGCACTTGTAG	5229	GTCAGAATAATGTCAAAGTGCTTACAGTGCAGGTAGTGATATGTGCATCTACTGCAGTGAAGGCACTTGTAGCATTATGGTGAC
hsa-mir-181a-1	chr1	-	198828172	198828281	hsa-mir-181a-1*	hsa-mir-181a-1*	mature	0.11	Y	198828197	198828218	ACCATCGACCGTTGATTGTACC	300	TGAGTTTTGAGGTTGCTTCAGTGAACATTCAACGCTGTCGGTGAGTTTGGAATTAAAATCAAAACCATCGACCGTTGATTGTACCCTATGGCTAACCATCATCTACTCCA
hsa-mir-181a-1	chr1	-	198828172	198828281	hsa-mir-181a-1	hsa-mir-181a-1_+2_3	mature	0.13		198828234	198828258	AACATTCAACGCTGTCGGTGAGTTT	352	TGAGTTTTGAGGTTGCTTCAGTGAACATTCAACGCTGTCGGTGAGTTTGGAATTAAAATCAAAACCATCGACCGTTGATTGTACCCTATGGCTAACCATCATCTACTCCA
hsa-mir-181a-1	chr1	-	198828172	198828281	hsa-mir-181a-1	hsa-mir-181a-1	mature	0.48	Y	198828236	198828258	AACATTCAACGCTGTCGGTGAGT	1300	TGAGTTTTGAGGTTGCTTCAGTGAACATTCAACGCTGTCGGTGAGTTTGGAATTAAAATCAAAACCATCGACCGTTGATTGTACCCTATGGCTAACCATCATCTACTCCA
hsa-mir-181a-2	chr9	+	127454720	127454829	hsa-mir-181a-2	hsa-mir-181a-2	mature	0.53	Y	127454758	127454780	AACATTCAACGCTGTCGGTGAGT	1300	AGAAGGGCTATCAGGCCAGCCTTCAGAGGACTCCAAGGAACATTCAACGCTGTCGGTGAGTTTGGGATTTGAAAAAACCACTGACCGTTGACTGTACCTTGGGGTCCTTA
hsa-mir-181a-2	chr9	+	127454720	127454829	hsa-mir-181a-2	hsa-mir-181a-2_+2_3	mature	0.14		127454758	127454782	AACATTCAACGCTGTCGGTGAGTTT	352	AGAAGGGCTATCAGGCCAGCCTTCAGAGGACTCCAAGGAACATTCAACGCTGTCGGTGAGTTTGGGATTTGAAAAAACCACTGACCGTTGACTGTACCTTGGGGTCCTTA
hsa-mir-181b-1	chr1	-	198828001	198828110	hsa-mir-181b-1	hsa-mir-181b-1_+1_3	mature	0.19		198828052	198828075	AACATTCATTGCTGTCGGTGGGTT	83	CCTGTGCAGAGATTATTTTTTAAAAGGTCACAATCAACATTCATTGCTGTCGGTGGGTTGAACTGTGTGGACAAGCTCACTGAACAATGAATGCAACTGTGGCCCCGCTT
hsa-mir-181b-1	chr1	-	198828001	198828110	hsa-mir-181b-1	hsa-mir-181b-1	mature	0.28	Y	198828053	198828075	AACATTCATTGCTGTCGGTGGGT	119	CCTGTGCAGAGATTATTTTTTAAAAGGTCACAATCAACATTCATTGCTGTCGGTGGGTTGAACTGTGTGGACAAGCTCACTGAACAATGAATGCAACTGTGGCCCCGCTT
hsa-mir-181b-1	chr1	-	198828001	198828110	hsa-mir-181b-1	hsa-mir-181b-1_-1_3	mature	0.13		198828054	198828075	AACATTCATTGCTGTCGGTGGG	59	CCTGTGCAGAGATTATTTTTTAAAAGGTCACAATCAACATTCATTGCTGTCGGTGGGTTGAACTGTGTGGACAAGCTCACTGAACAATGAATGCAACTGTGGCCCCGCTT
hsa-mir-181b-1	chr1	-	198828001	198828110	hsa-mir-181b-1	hsa-mir-181b-1_-2_3	mature	0.2		198828055	198828075	AACATTCATTGCTGTCGGTGG	85	CCTGTGCAGAGATTATTTTTTAAAAGGTCACAATCAACATTCATTGCTGTCGGTGGGTTGAACTGTGTGGACAAGCTCACTGAACAATGAATGCAACTGTGGCCCCGCTT
hsa-mir-181b-2	chr9	+	127455988	127456076	hsa-mir-181b-2	hsa-mir-181b-2_-2_3	mature	0.16		127456003	127456023	AACATTCATTGCTGTCGGTGG	85	CTGATGGCTGCACTCAACATTCATTGCTGTCGGTGGGTTTGAGTCTGAATCAACTCACTGATCAATGAATGCAAACTGCGGACCAAACA
hsa-mir-181b-2	chr9	+	127455988	127456076	hsa-mir-181b-2	hsa-mir-181b-2_-1_3	mature	0.11		127456003	127456024	AACATTCATTGCTGTCGGTGGG	59	CTGATGGCTGCACTCAACATTCATTGCTGTCGGTGGGTTTGAGTCTGAATCAACTCACTGATCAATGAATGCAAACTGCGGACCAAACA
hsa-mir-181b-2	chr9	+	127455988	127456076	hsa-mir-181b-2	hsa-mir-181b-2	mature	0.22	Y	127456003	127456025	AACATTCATTGCTGTCGGTGGGT	119	CTGATGGCTGCACTCAACATTCATTGCTGTCGGTGGGTTTGAGTCTGAATCAACTCACTGATCAATGAATGCAAACTGCGGACCAAACA
hsa-mir-181b-2	chr9	+	127455988	127456076	hsa-mir-181b-2	hsa-mir-181b-2_+1_3	mature	0.15		127456003	127456026	AACATTCATTGCTGTCGGTGGGTT	83	CTGATGGCTGCACTCAACATTCATTGCTGTCGGTGGGTTTGAGTCTGAATCAACTCACTGATCAATGAATGCAAACTGCGGACCAAACA
hsa-mir-181b-2	chr9	+	127455988	127456076	hsa-mir-181b-2	hsa-mir-181b-2_+2_3	mature	0.2		127456003	127456027	AACATTCATTGCTGTCGGTGGGTTT	104	CTGATGGCTGCACTCAACATTCATTGCTGTCGGTGGGTTTGAGTCTGAATCAACTCACTGATCAATGAATGCAAACTGCGGACCAAACA
hsa-mir-181c	chr19	+	13985512	13985621	hsa-mir-181c	hsa-mir-181c	mature	0.19	Y	13985538	13985559	AACATTCAACCTGTCGGTGAGT	127	CGGAAAATTTGCCAAGGGTTTGGGGGAACATTCAACCTGTCGGTGAGTTTGGGCAGCTCAGGCAAACCATCGACCGTTGAGTGGACCCTGAGGCCTGGAATTGCCATCCT
hsa-mir-181c	chr19	+	13985512	13985621	hsa-mir-181c	hsa-mir-181c_+1_3	mature	0.17		13985538	13985560	AACATTCAACCTGTCGGTGAGTT	111	CGGAAAATTTGCCAAGGGTTTGGGGGAACATTCAACCTGTCGGTGAGTTTGGGCAGCTCAGGCAAACCATCGACCGTTGAGTGGACCCTGAGGCCTGGAATTGCCATCCT
hsa-mir-181c	chr19	+	13985512	13985621	hsa-mir-181c	hsa-mir-181c_+2_3	mature	0.49		13985538	13985561	AACATTCAACCTGTCGGTGAGTTT	319	CGGAAAATTTGCCAAGGGTTTGGGGGAACATTCAACCTGTCGGTGAGTTTGGGCAGCTCAGGCAAACCATCGACCGTTGAGTGGACCCTGAGGCCTGGAATTGCCATCCT
hsa-mir-181d	chr19	+	13985688	13985824	hsa-mir-181d	hsa-mir-181d_-1_3	mature	0.1		13985723	13985744	AACATTCATTGTTGTCGGTGGG	32	GTCCCCTCCCCTAGGCCACAGCCGAGGTCACAATCAACATTCATTGTTGTCGGTGGGTTGTGAGGACTGAGGCCAGACCCACCGGGGGATGAATGTCACTGTGGCTGGGCCAGACACGGCTTAAGGGGAATGGGGAC
hsa-mir-181d	chr19	+	13985688	13985824	hsa-mir-181d	hsa-mir-181d	mature	0.52	Y	13985723	13985745	AACATTCATTGTTGTCGGTGGGT	160	GTCCCCTCCCCTAGGCCACAGCCGAGGTCACAATCAACATTCATTGTTGTCGGTGGGTTGTGAGGACTGAGGCCAGACCCACCGGGGGATGAATGTCACTGTGGCTGGGCCAGACACGGCTTAAGGGGAATGGGGAC
hsa-mir-181d	chr19	+	13985688	13985824	hsa-mir-181d	hsa-mir-181d_+1_3	mature	0.25		13985723	13985746	AACATTCATTGTTGTCGGTGGGTT	77	GTCCCCTCCCCTAGGCCACAGCCGAGGTCACAATCAACATTCATTGTTGTCGGTGGGTTGTGAGGACTGAGGCCAGACCCACCGGGGGATGAATGTCACTGTGGCTGGGCCAGACACGGCTTAAGGGGAATGGGGAC
hsa-mir-182	chr7	-	129410222	129410331	hsa-mir-182*	hsa-mir-182*	mature	0	Y	129410245	129410265	TGGTTCTAGACTTGCCAACTA	28	GAGCTGCTTGCCTCCCCCCGTTTTTGGCAATGGTAGAACTCACACTGGTGAGGTAACAGGATCCGGTGGTTCTAGACTTGCCAACTATGGGGCGAGGACTCAGCCGGCAC
hsa-mir-182	chr7	-	129410222	129410331	hsa-mir-182	hsa-mir-182	mature	0.47	Y	129410286	129410309	TTTGGCAATGGTAGAACTCACACT	449126	GAGCTGCTTGCCTCCCCCCGTTTTTGGCAATGGTAGAACTCACACTGGTGAGGTAACAGGATCCGGTGGTTCTAGACTTGCCAACTATGGGGCGAGGACTCAGCCGGCAC
hsa-mir-182	chr7	-	129410222	129410331	hsa-mir-182	hsa-mir-182_-1_3	mature	0.15		129410287	129410309	TTTGGCAATGGTAGAACTCACAC	143461	GAGCTGCTTGCCTCCCCCCGTTTTTGGCAATGGTAGAACTCACACTGGTGAGGTAACAGGATCCGGTGGTTCTAGACTTGCCAACTATGGGGCGAGGACTCAGCCGGCAC
hsa-mir-182	chr7	-	129410222	129410331	hsa-mir-182	hsa-mir-182_-2_3	mature	0.13		129410288	129410309	TTTGGCAATGGTAGAACTCACA	131113	GAGCTGCTTGCCTCCCCCCGTTTTTGGCAATGGTAGAACTCACACTGGTGAGGTAACAGGATCCGGTGGTTCTAGACTTGCCAACTATGGGGCGAGGACTCAGCCGGCAC
hsa-mir-183	chr7	-	129414744	129414853	hsa-mir-183*	hsa-mir-183*	mature	0	Y	129414767	129414788	GTGAATTACCGAAGGGCCATAA	275	CCGCAGAGTGTGACTCCTGTTCTGTGTATGGCACTGGTAGAATTCACTGTGAACAGTCTCAGTCAGTGAATTACCGAAGGGCCATAAACAGAGCAGAGACAGATCCACGA
hsa-mir-183	chr7	-	129414744	129414853	hsa-mir-183	hsa-mir-183_+1_3	mature	0.2		129414805	129414827	TATGGCACTGGTAGAATTCACTG	21066	CCGCAGAGTGTGACTCCTGTTCTGTGTATGGCACTGGTAGAATTCACTGTGAACAGTCTCAGTCAGTGAATTACCGAAGGGCCATAAACAGAGCAGAGACAGATCCACGA
hsa-mir-183	chr7	-	129414744	129414853	hsa-mir-183	hsa-mir-183	mature	0.45	Y	129414806	129414827	TATGGCACTGGTAGAATTCACT	46764	CCGCAGAGTGTGACTCCTGTTCTGTGTATGGCACTGGTAGAATTCACTGTGAACAGTCTCAGTCAGTGAATTACCGAAGGGCCATAAACAGAGCAGAGACAGATCCACGA
hsa-mir-184	chr15	+	79502129	79502212	hsa-mir-184	hsa-mir-184_-2_3	mature	0.21		79502181	79502200	TGGACGGAGAACTGATAAGG	7518	CCAGTCACGTCCCCTTATCACTTTTCCAGCCCAGCTTTGTGACTGTAAGTGTTGGACGGAGAACTGATAAGGGTAGGTGATTGA
hsa-mir-184	chr15	+	79502129	79502212	hsa-mir-184	hsa-mir-184_-1_3	mature	0.12		79502181	79502201	TGGACGGAGAACTGATAAGGG	4404	CCAGTCACGTCCCCTTATCACTTTTCCAGCCCAGCTTTGTGACTGTAAGTGTTGGACGGAGAACTGATAAGGGTAGGTGATTGA
hsa-mir-184	chr15	+	79502129	79502212	hsa-mir-184	hsa-mir-184	mature	0.45	Y	79502181	79502202	TGGACGGAGAACTGATAAGGGT	15665	CCAGTCACGTCCCCTTATCACTTTTCCAGCCCAGCTTTGTGACTGTAAGTGTTGGACGGAGAACTGATAAGGGTAGGTGATTGA
hsa-mir-185	chr22	+	20020661	20020742	hsa-mir-185	hsa-mir-185	mature	0.62	Y	20020675	20020696	TGGAGAGAAAGGCAGTTCCTGA	19788	AGGGGGCGAGGGATTGGAGAGAAAGGCAGTTCCTGATGGTCCCCTCCCCAGGGGCTGGCTTTCCTCTGGTCCTTCCCTCCCA
hsa-mir-185	chr22	+	20020661	20020742	hsa-mir-185	hsa-mir-185_+1_3	mature	0.17		20020675	20020697	TGGAGAGAAAGGCAGTTCCTGAT	5382	AGGGGGCGAGGGATTGGAGAGAAAGGCAGTTCCTGATGGTCCCCTCCCCAGGGGCTGGCTTTCCTCTGGTCCTTCCCTCCCA
hsa-mir-186	chr1	-	71533313	71533398	hsa-mir-186*	hsa-mir-186*	mature	0	Y	71533324	71533345	GCCCAAAGGTGAATTTTTTGGG	15	TGCTTGTAACTTTCCAAAGAATTCTCCTTTTGGGCTTTCTGGTTTTATTTTAAGCCCAAAGGTGAATTTTTTGGGAAGTTTGAGCT
hsa-mir-186	chr1	-	71533313	71533398	hsa-mir-186	hsa-mir-186_+1_3	mature	0.37		71533362	71533384	CAAAGAATTCTCCTTTTGGGCTT	55672	TGCTTGTAACTTTCCAAAGAATTCTCCTTTTGGGCTTTCTGGTTTTATTTTAAGCCCAAAGGTGAATTTTTTGGGAAGTTTGAGCT
hsa-mir-186	chr1	-	71533313	71533398	hsa-mir-186	hsa-mir-186	mature	0.42	Y	71533363	71533384	CAAAGAATTCTCCTTTTGGGCT	63297	TGCTTGTAACTTTCCAAAGAATTCTCCTTTTGGGCTTTCTGGTTTTATTTTAAGCCCAAAGGTGAATTTTTTGGGAAGTTTGAGCT
hsa-mir-188	chrX	+	49768108	49768193	hsa-mir-188-5p	hsa-mir-188-5p_-1_3	mature	0.16		49768122	49768141	CATCCCTTGCATGGTGGAGG	39	TGCTCCCTCTCTCACATCCCTTGCATGGTGGAGGGTGAGCTTTCTGAAAACCCCTCCCACATGCAGGGTTTGCAGGATGGCGAGCC
hsa-mir-188	chrX	+	49768108	49768193	hsa-mir-188-5p	hsa-mir-188-5p	mature	0.07	Y	49768122	49768142	CATCCCTTGCATGGTGGAGGG	17	TGCTCCCTCTCTCACATCCCTTGCATGGTGGAGGGTGAGCTTTCTGAAAACCCCTCCCACATGCAGGGTTTGCAGGATGGCGAGCC
hsa-mir-188	chrX	+	49768108	49768193	hsa-mir-188-5p	hsa-mir-188-5p_+1_3	mature	0.35		49768122	49768143	CATCCCTTGCATGGTGGAGGGT	81	TGCTCCCTCTCTCACATCCCTTGCATGGTGGAGGGTGAGCTTTCTGAAAACCCCTCCCACATGCAGGGTTTGCAGGATGGCGAGCC
hsa-mir-188	chrX	+	49768108	49768193	hsa-mir-188	hsa-mir-188_other1	other	0.11		49768143	49768160	TGAGCTTTCTGAAAACCC	26	TGCTCCCTCTCTCACATCCCTTGCATGGTGGAGGGTGAGCTTTCTGAAAACCCCTCCCACATGCAGGGTTTGCAGGATGGCGAGCC
hsa-mir-188	chrX	+	49768108	49768193	hsa-mir-188-3p	hsa-mir-188-3p	mature	0.09	Y	49768161	49768181	CTCCCACATGCAGGGTTTGCA	23	TGCTCCCTCTCTCACATCCCTTGCATGGTGGAGGGTGAGCTTTCTGAAAACCCCTCCCACATGCAGGGTTTGCAGGATGGCGAGCC
hsa-mir-18a	chr13	+	92003004	92003074	hsa-mir-18a	hsa-mir-18a_-2_3	mature	0.13		92003009	92003029	TAAGGTGCATCTAGTGCAGAT	2621	TGTTCTAAGGTGCATCTAGTGCAGATAGTGAAGTAGATTAGCATCTACTGCCCTAAGTGCTCCTTCTGGCA
hsa-mir-18a	chr13	+	92003004	92003074	hsa-mir-18a	hsa-mir-18a_-1_3	mature	0.12		92003009	92003030	TAAGGTGCATCTAGTGCAGATA	2615	TGTTCTAAGGTGCATCTAGTGCAGATAGTGAAGTAGATTAGCATCTACTGCCCTAAGTGCTCCTTCTGGCA
hsa-mir-18a	chr13	+	92003004	92003074	hsa-mir-18a	hsa-mir-18a	mature	0.45	Y	92003009	92003031	TAAGGTGCATCTAGTGCAGATAG	9257	TGTTCTAAGGTGCATCTAGTGCAGATAGTGAAGTAGATTAGCATCTACTGCCCTAAGTGCTCCTTCTGGCA
hsa-mir-18a	chr13	+	92003004	92003074	hsa-mir-18a*	hsa-mir-18a*	mature	0.05	Y	92003050	92003072	ACTGCCCTAAGTGCTCCTTCTGG	1074	TGTTCTAAGGTGCATCTAGTGCAGATAGTGAAGTAGATTAGCATCTACTGCCCTAAGTGCTCCTTCTGGCA
hsa-mir-18b	chrX	-	133304070	133304140	hsa-mir-18b*-star	hsa-mir-18b*-star_-1_3	star	0.9		133304117	133304135	TAAGGTGCATCTAGTGCAG	546	TGTGTTAAGGTGCATCTAGTGCAGTTAGTGAAGCAGCTTAGAATCTACTGCCCTAAATGCCCCTTCTGGCA
hsa-mir-190	chr15	+	63116155	63116239	hsa-mir-190	hsa-mir-190_-1_3	mature	0.1		63116169	63116189	TGATATGTTTGATATATTAGG	407	TGCAGGCCTCTGTGTGATATGTTTGATATATTAGGTTGTTATTTAATCCAACTATATATCAAACATATTCCTACAGTGTCTTGCC
hsa-mir-190	chr15	+	63116155	63116239	hsa-mir-190	hsa-mir-190	mature	0.19	Y	63116169	63116190	TGATATGTTTGATATATTAGGT	743	TGCAGGCCTCTGTGTGATATGTTTGATATATTAGGTTGTTATTTAATCCAACTATATATCAAACATATTCCTACAGTGTCTTGCC
hsa-mir-190	chr15	+	63116155	63116239	hsa-mir-190	hsa-mir-190_+1_3	mature	0.32		63116169	63116191	TGATATGTTTGATATATTAGGTT	1219	TGCAGGCCTCTGTGTGATATGTTTGATATATTAGGTTGTTATTTAATCCAACTATATATCAAACATATTCCTACAGTGTCTTGCC
hsa-mir-190	chr15	+	63116155	63116239	hsa-mir-190	hsa-mir-190_+2_3	mature	0.21		63116169	63116192	TGATATGTTTGATATATTAGGTTG	818	TGCAGGCCTCTGTGTGATATGTTTGATATATTAGGTTGTTATTTAATCCAACTATATATCAAACATATTCCTACAGTGTCTTGCC
hsa-mir-1908	chr11	-	61582632	61582711	hsa-mir-1908	hsa-mir-1908	mature	0.43	Y	61582680	61582700	CGGCGGGGACGGCGATTGGTC	19	CGGGAATGCCGCGGCGGGGACGGCGATTGGTCCGTATGTGTGGTGCCACCGGCCGCCGGCTCCGCCCCGGCCCCCGCCCC
hsa-mir-1908	chr11	-	61582632	61582711	hsa-mir-1908	hsa-mir-1908_-1_3	mature	0.38		61582681	61582700	CGGCGGGGACGGCGATTGGT	17	CGGGAATGCCGCGGCGGGGACGGCGATTGGTCCGTATGTGTGGTGCCACCGGCCGCCGGCTCCGCCCCGGCCCCCGCCCC
hsa-mir-190b	chr1	-	154166140	154166218	hsa-mir-190b	hsa-mir-190b_+2_3	mature	0.25		154166186	154166208	TGATATGTTTGATATTGGGTTGT	14	TGCTTCTGTGTGATATGTTTGATATTGGGTTGTTTAATTAGGAACCAACTAAATGTCAAACATATTCTTACAGCAGCAG
hsa-mir-190b	chr1	-	154166140	154166218	hsa-mir-190b	hsa-mir-190b_+1_3	mature	0.61		154166187	154166208	TGATATGTTTGATATTGGGTTG	34	TGCTTCTGTGTGATATGTTTGATATTGGGTTGTTTAATTAGGAACCAACTAAATGTCAAACATATTCTTACAGCAGCAG
hsa-mir-190b	chr1	-	154166140	154166218	hsa-mir-190b	hsa-mir-190b	mature	0.1	Y	154166188	154166208	TGATATGTTTGATATTGGGTT	6	TGCTTCTGTGTGATATGTTTGATATTGGGTTGTTTAATTAGGAACCAACTAAATGTCAAACATATTCTTACAGCAGCAG
hsa-mir-191	chr3	-	49058050	49058141	hsa-mir-191*	hsa-mir-191*	mature	0	Y	49058063	49058084	GCTGCGCTTGGATTTCGTCCCC	47	CGGCTGGACAGCGGGCAACGGAATCCCAAAAGCAGCTGTTGTCTCCAGAGCATTCCAGCTGCGCTTGGATTTCGTCCCCTGCTCTCCTGCCT
hsa-mir-191	chr3	-	49058050	49058141	hsa-mir-191	hsa-mir-191_+1_3	mature	0.29		49058103	49058126	CAACGGAATCCCAAAAGCAGCTGT	15967	CGGCTGGACAGCGGGCAACGGAATCCCAAAAGCAGCTGTTGTCTCCAGAGCATTCCAGCTGCGCTTGGATTTCGTCCCCTGCTCTCCTGCCT
hsa-mir-191	chr3	-	49058050	49058141	hsa-mir-191	hsa-mir-191	mature	0.52	Y	49058104	49058126	CAACGGAATCCCAAAAGCAGCTG	28600	CGGCTGGACAGCGGGCAACGGAATCCCAAAAGCAGCTGTTGTCTCCAGAGCATTCCAGCTGCGCTTGGATTTCGTCCCCTGCTCTCCTGCCT
hsa-mir-1910	chr16	-	85775226	85775305	hsa-mir-1910-star	hsa-mir-1910-star_-1_3	star	0.12		85775236	85775255	GAGGCAGAAGCAGGATGACA	5	TGTCCCTTCAGCCAGTCCTGTGCCTGCCGCCTTTGTGCTGTCCTTGGAGGGAGGCAGAAGCAGGATGACAATGAGGGCAA
hsa-mir-1910	chr16	-	85775226	85775305	hsa-mir-1910	hsa-mir-1910_+2_3	mature	0.23		85775272	85775294	CCAGTCCTGTGCCTGCCGCCTTT	9	TGTCCCTTCAGCCAGTCCTGTGCCTGCCGCCTTTGTGCTGTCCTTGGAGGGAGGCAGAAGCAGGATGACAATGAGGGCAA
hsa-mir-1910	chr16	-	85775226	85775305	hsa-mir-1910	hsa-mir-1910	mature	0.35	Y	85775274	85775294	CCAGTCCTGTGCCTGCCGCCT	14	TGTCCCTTCAGCCAGTCCTGTGCCTGCCGCCTTTGTGCTGTCCTTGGAGGGAGGCAGAAGCAGGATGACAATGAGGGCAA
hsa-mir-192	chr11	-	64658608	64658717	hsa-mir-192*	hsa-mir-192*	mature	0	Y	64658630	64658651	CTGCCAATTCCATAGGTCACAG	26	GCCGAGACCGAGTGCACAGGGCTCTGACCTATGAATTGACAGCCAGTGCTCTCGTCTCCCCTCTGGCTGCCAATTCCATAGGTCACAGGTATGTTCGCCTCAATGCCAGC
hsa-mir-192	chr11	-	64658608	64658717	hsa-mir-192	hsa-mir-192_+2_3_-1_5	mature	0.13		64658672	64658693	TGACCTATGAATTGACAGCCAG	11721	GCCGAGACCGAGTGCACAGGGCTCTGACCTATGAATTGACAGCCAGTGCTCTCGTCTCCCCTCTGGCTGCCAATTCCATAGGTCACAGGTATGTTCGCCTCAATGCCAGC
hsa-mir-192	chr11	-	64658608	64658717	hsa-mir-192	hsa-mir-192_+1_3	mature	0.17		64658673	64658694	CTGACCTATGAATTGACAGCCA	15397	GCCGAGACCGAGTGCACAGGGCTCTGACCTATGAATTGACAGCCAGTGCTCTCGTCTCCCCTCTGGCTGCCAATTCCATAGGTCACAGGTATGTTCGCCTCAATGCCAGC
hsa-mir-192	chr11	-	64658608	64658717	hsa-mir-192	hsa-mir-192	mature	0.34	Y	64658674	64658694	CTGACCTATGAATTGACAGCC	29759	GCCGAGACCGAGTGCACAGGGCTCTGACCTATGAATTGACAGCCAGTGCTCTCGTCTCCCCTCTGGCTGCCAATTCCATAGGTCACAGGTATGTTCGCCTCAATGCCAGC
hsa-mir-193a	chr17	+	29887014	29887101	hsa-mir-193a-5p	hsa-mir-193a-5p	mature	0.05	Y	29887034	29887055	TGGGTCTTTGCGGGCGAGATGA	1081	CGAGGATGGGAGCTGAGGGCTGGGTCTTTGCGGGCGAGATGAGGGTGTCGGATCAACTGGCCTACAAAGTCCCAGTTCTCGGCCCCCG
hsa-mir-193a	chr17	+	29887014	29887101	hsa-mir-193a-3p	hsa-mir-193a-3p_-1_3	mature	0.14		29887068	29887088	AACTGGCCTACAAAGTCCCAG	2609	CGAGGATGGGAGCTGAGGGCTGGGTCTTTGCGGGCGAGATGAGGGTGTCGGATCAACTGGCCTACAAAGTCCCAGTTCTCGGCCCCCG
hsa-mir-193a	chr17	+	29887014	29887101	hsa-mir-193a-3p	hsa-mir-193a-3p	mature	0.54	Y	29887068	29887089	AACTGGCCTACAAAGTCCCAGT	9890	CGAGGATGGGAGCTGAGGGCTGGGTCTTTGCGGGCGAGATGAGGGTGTCGGATCAACTGGCCTACAAAGTCCCAGTTCTCGGCCCCCG
hsa-mir-193b	chr16	+	14397823	14397905	hsa-mir-193b*	hsa-mir-193b*	mature	0.01	Y	14397836	14397857	CGGGGTTTTGAGGGCGAGATGA	149	GTGGTCTCAGAATCGGGGTTTTGAGGGCGAGATGAGTTTATGTTTTATCCAACTGGCCCTCAAAGTCCCGCTTTTGGGGTCAT
hsa-mir-193b	chr16	+	14397823	14397905	hsa-mir-193b	hsa-mir-193b_-2_3	mature	0.18		14397873	14397892	AACTGGCCCTCAAAGTCCCG	2715	GTGGTCTCAGAATCGGGGTTTTGAGGGCGAGATGAGTTTATGTTTTATCCAACTGGCCCTCAAAGTCCCGCTTTTGGGGTCAT
hsa-mir-193b	chr16	+	14397823	14397905	hsa-mir-193b	hsa-mir-193b_-1_3	mature	0.19		14397873	14397893	AACTGGCCCTCAAAGTCCCGC	2861	GTGGTCTCAGAATCGGGGTTTTGAGGGCGAGATGAGTTTATGTTTTATCCAACTGGCCCTCAAAGTCCCGCTTTTGGGGTCAT
hsa-mir-193b	chr16	+	14397823	14397905	hsa-mir-193b	hsa-mir-193b	mature	0.32	Y	14397873	14397894	AACTGGCCCTCAAAGTCCCGCT	4755	GTGGTCTCAGAATCGGGGTTTTGAGGGCGAGATGAGTTTATGTTTTATCCAACTGGCCCTCAAAGTCCCGCTTTTGGGGTCAT
hsa-mir-193b	chr16	+	14397823	14397905	hsa-mir-193b	hsa-mir-193b_+1_3	mature	0.1		14397873	14397895	AACTGGCCCTCAAAGTCCCGCTT	1468	GTGGTCTCAGAATCGGGGTTTTGAGGGCGAGATGAGTTTATGTTTTATCCAACTGGCCCTCAAAGTCCCGCTTTTGGGGTCAT
hsa-mir-194-1	chr1	-	220291498	220291582	hsa-mir-194-1	hsa-mir-194-1_+2_3	mature	0.17		220291545	220291568	TGTAACAGCAACTCCATGTGGACT	1029	ATGGTGTTATCAAGTGTAACAGCAACTCCATGTGGACTGTGTACCAATTTCCAGTGGAGATGCTGTTACTTTTGATGGTTACCAA
hsa-mir-194-1	chr1	-	220291498	220291582	hsa-mir-194-1	hsa-mir-194-1_+1_3	mature	0.11		220291546	220291568	TGTAACAGCAACTCCATGTGGAC	656	ATGGTGTTATCAAGTGTAACAGCAACTCCATGTGGACTGTGTACCAATTTCCAGTGGAGATGCTGTTACTTTTGATGGTTACCAA
hsa-mir-194-1	chr1	-	220291498	220291582	hsa-mir-194-1	hsa-mir-194-1	mature	0.51	Y	220291547	220291568	TGTAACAGCAACTCCATGTGGA	2970	ATGGTGTTATCAAGTGTAACAGCAACTCCATGTGGACTGTGTACCAATTTCCAGTGGAGATGCTGTTACTTTTGATGGTTACCAA
hsa-mir-194-2	chr11	-	64658826	64658910	hsa-mir-194-2*	hsa-mir-194-2*	mature	0	Y	64658839	64658860	CCAGTGGGGCTGCTGTTATCTG	13	TGGTTCCCGCCCCCTGTAACAGCAACTCCATGTGGAAGTGCCCACTGGTTCCAGTGGGGCTGCTGTTATCTGGGGCGAGGGCCAG
hsa-mir-194-2	chr11	-	64658826	64658910	hsa-mir-194-2	hsa-mir-194-2_+2_3	mature	0.17		64658873	64658896	TGTAACAGCAACTCCATGTGGAAG	1681	TGGTTCCCGCCCCCTGTAACAGCAACTCCATGTGGAAGTGCCCACTGGTTCCAGTGGGGCTGCTGTTATCTGGGGCGAGGGCCAG
hsa-mir-194-2	chr11	-	64658826	64658910	hsa-mir-194-2	hsa-mir-194-2_+1_3	mature	0.39		64658874	64658896	TGTAACAGCAACTCCATGTGGAA	3817	TGGTTCCCGCCCCCTGTAACAGCAACTCCATGTGGAAGTGCCCACTGGTTCCAGTGGGGCTGCTGTTATCTGGGGCGAGGGCCAG
hsa-mir-194-2	chr11	-	64658826	64658910	hsa-mir-194-2	hsa-mir-194-2	mature	0.3	Y	64658875	64658896	TGTAACAGCAACTCCATGTGGA	2970	TGGTTCCCGCCCCCTGTAACAGCAACTCCATGTGGAAGTGCCCACTGGTTCCAGTGGGGCTGCTGTTATCTGGGGCGAGGGCCAG
hsa-mir-195	chr17	-	6920933	6921019	hsa-mir-195*	hsa-mir-195*	mature	0	Y	6920946	6920967	CCAATATTGGCTGTGCTGCTCC	170	AGCTTCCCTGGCTCTAGCAGCACAGAAATATTGGCACAGGGAAGCGAGTCTGCCAATATTGGCTGTGCTGCTCCAGGCAGGGTGGTG
hsa-mir-195	chr17	-	6920933	6921019	hsa-mir-195	hsa-mir-195_+2_3	mature	0.14		6920983	6921005	TAGCAGCACAGAAATATTGGCAC	9285	AGCTTCCCTGGCTCTAGCAGCACAGAAATATTGGCACAGGGAAGCGAGTCTGCCAATATTGGCTGTGCTGCTCCAGGCAGGGTGGTG
hsa-mir-195	chr17	-	6920933	6921019	hsa-mir-195	hsa-mir-195_+1_3	mature	0.62		6920984	6921005	TAGCAGCACAGAAATATTGGCA	40506	AGCTTCCCTGGCTCTAGCAGCACAGAAATATTGGCACAGGGAAGCGAGTCTGCCAATATTGGCTGTGCTGCTCCAGGCAGGGTGGTG
hsa-mir-195	chr17	-	6920933	6921019	hsa-mir-195	hsa-mir-195	mature	0.16	Y	6920985	6921005	TAGCAGCACAGAAATATTGGC	10464	AGCTTCCCTGGCTCTAGCAGCACAGAAATATTGGCACAGGGAAGCGAGTCTGCCAATATTGGCTGTGCTGCTCCAGGCAGGGTGGTG
hsa-mir-196a-1	chr17	-	46709851	46709920	hsa-mir-196a-1	hsa-mir-196a-1	mature	0.69	Y	46709893	46709914	TAGGTAGTTTCATGTTGTTGGG	4282	GTGAATTAGGTAGTTTCATGTTGTTGGGCCTGGGTTTCTGAACACAACAACATTAAACCACCCGATTCAC
hsa-mir-196a-1	chr17	-	46709851	46709920	hsa-mir-196a-1	hsa-mir-196a-1_-1_3	mature	0.19		46709894	46709914	TAGGTAGTTTCATGTTGTTGG	1225	GTGAATTAGGTAGTTTCATGTTGTTGGGCCTGGGTTTCTGAACACAACAACATTAAACCACCCGATTCAC
hsa-mir-196a-2	chr12	+	54385521	54385630	hsa-mir-196a-2	hsa-mir-196a-2_-1_3	mature	0.14		54385545	54385565	TAGGTAGTTTCATGTTGTTGG	1225	TGCTCGCTCAGCTGATCTGTGGCTTAGGTAGTTTCATGTTGTTGGGATTGAGTTTTGAACTCGGCAACAAGAAACTGCCTGAGTTACATCAGTCGGTTTTCGTCGAGGGC
hsa-mir-196a-2	chr12	+	54385521	54385630	hsa-mir-196a-2	hsa-mir-196a-2	mature	0.5	Y	54385545	54385566	TAGGTAGTTTCATGTTGTTGGG	4282	TGCTCGCTCAGCTGATCTGTGGCTTAGGTAGTTTCATGTTGTTGGGATTGAGTTTTGAACTCGGCAACAAGAAACTGCCTGAGTTACATCAGTCGGTTTTCGTCGAGGGC
hsa-mir-196a-2	chr12	+	54385521	54385630	hsa-mir-196a-2	hsa-mir-196a-2_+1_3	mature	0.26		54385545	54385567	TAGGTAGTTTCATGTTGTTGGGA	2189	TGCTCGCTCAGCTGATCTGTGGCTTAGGTAGTTTCATGTTGTTGGGATTGAGTTTTGAACTCGGCAACAAGAAACTGCCTGAGTTACATCAGTCGGTTTTCGTCGAGGGC
hsa-mir-196b	chr7	-	27209098	27209181	hsa-mir-196b	hsa-mir-196b_+1_3	mature	0.4		27209145	27209167	TAGGTAGTTTCCTGTTGTTGGGA	6	ACTGGTCGGTGATTTAGGTAGTTTCCTGTTGTTGGGATCCACCTTTCTCTCGACAGCACGACACTGCCTTCATTACTTCAGTTG
hsa-mir-196b	chr7	-	27209098	27209181	hsa-mir-196b	hsa-mir-196b	mature	0.4	Y	27209146	27209167	TAGGTAGTTTCCTGTTGTTGGG	6	ACTGGTCGGTGATTTAGGTAGTTTCCTGTTGTTGGGATCCACCTTTCTCTCGACAGCACGACACTGCCTTCATTACTTCAGTTG
hsa-mir-196b	chr7	-	27209098	27209181	hsa-mir-196b	hsa-mir-196b_-1_3	mature	0.2		27209147	27209167	TAGGTAGTTTCCTGTTGTTGG	3	ACTGGTCGGTGATTTAGGTAGTTTCCTGTTGTTGGGATCCACCTTTCTCTCGACAGCACGACACTGCCTTCATTACTTCAGTTG
hsa-mir-197	chr1	+	110141514	110141588	hsa-mir-197	hsa-mir-197_-1_3	mature	0.25		110141561	110141581	TTCACCACCTTCTCCACCCAG	2011	GGCTGTGCCGGGTAGAGAGGGCAGTGGGAGGTAAGAGCTCTTCACCCTTCACCACCTTCTCCACCCAGCATGGCC
hsa-mir-197	chr1	+	110141514	110141588	hsa-mir-197	hsa-mir-197	mature	0.57	Y	110141561	110141582	TTCACCACCTTCTCCACCCAGC	4571	GGCTGTGCCGGGTAGAGAGGGCAGTGGGAGGTAAGAGCTCTTCACCCTTCACCACCTTCTCCACCCAGCATGGCC
hsa-mir-1976	chr1	+	26881032	26881083	hsa-mir-1976	hsa-mir-1976_+1_3_+1_5	mature	0.13		26881063	26881084	TCCTCCTGCCCTCCTTGCTGTA	2	GCAGCAAGGAAGGCAGGGGTCCTAAGGTGTGTCCTCCTGCCCTCCTTGCTGT
hsa-mir-1976	chr1	+	26881032	26881083	hsa-mir-1976	hsa-mir-1976_+2_3	mature	0.13		26881064	26881085	CCTCCTGCCCTCCTTGCTGTAG	2	GCAGCAAGGAAGGCAGGGGTCCTAAGGTGTGTCCTCCTGCCCTCCTTGCTGT
hsa-mir-1976	chr1	+	26881032	26881083	hsa-mir-1976	hsa-mir-1976_other1	other	0.4		26881066	26881086	TCCTGCCCTCCTTGCTGTAGA	6	GCAGCAAGGAAGGCAGGGGTCCTAAGGTGTGTCCTCCTGCCCTCCTTGCTGT
hsa-mir-199a-1	chr19	-	10928101	10928171	hsa-mir-199a-1-3p	hsa-mir-199a-1-3p	mature	0.29	Y	10928104	10928125	ACAGTAGTCTGCACATTGGTTA	512	GCCAACCCAGTGTTCAGACTACCTGTTCAGGAGGCTCTCAATGTGTACAGTAGTCTGCACATTGGTTAGGC
hsa-mir-199a-1	chr19	-	10928101	10928171	hsa-mir-199a-1-3p	hsa-mir-199a-1-3p_-1_3	mature	0.27		10928105	10928125	ACAGTAGTCTGCACATTGGTT	474	GCCAACCCAGTGTTCAGACTACCTGTTCAGGAGGCTCTCAATGTGTACAGTAGTCTGCACATTGGTTAGGC
hsa-mir-199a-1	chr19	-	10928101	10928171	hsa-mir-199a-1-3p	hsa-mir-199a-1-3p_-1_3_+1_5	mature	0.16		10928105	10928126	TACAGTAGTCTGCACATTGGTT	280	GCCAACCCAGTGTTCAGACTACCTGTTCAGGAGGCTCTCAATGTGTACAGTAGTCTGCACATTGGTTAGGC
hsa-mir-199a-1	chr19	-	10928101	10928171	hsa-mir-199a-1-5p	hsa-mir-199a-1-5p	mature	0	Y	10928144	10928166	CCCAGTGTTCAGACTACCTGTTC	11	GCCAACCCAGTGTTCAGACTACCTGTTCAGGAGGCTCTCAATGTGTACAGTAGTCTGCACATTGGTTAGGC
hsa-mir-199a-2	chr1	-	172113674	172113783	hsa-mir-199a-2-3p	hsa-mir-199a-2-3p	mature	0.29	Y	172113693	172113714	ACAGTAGTCTGCACATTGGTTA	512	AGGAAGCTTCTGGAGATCCTGCTCCGTCGCCCCAGTGTTCAGACTACCTGTTCAGGACAATGCCGTTGTACAGTAGTCTGCACATTGGTTAGACTGGGCAAGGGAGAGCA
hsa-mir-199a-2	chr1	-	172113674	172113783	hsa-mir-199a-2-3p	hsa-mir-199a-2-3p_-1_3	mature	0.27		172113694	172113714	ACAGTAGTCTGCACATTGGTT	474	AGGAAGCTTCTGGAGATCCTGCTCCGTCGCCCCAGTGTTCAGACTACCTGTTCAGGACAATGCCGTTGTACAGTAGTCTGCACATTGGTTAGACTGGGCAAGGGAGAGCA
hsa-mir-199a-2	chr1	-	172113674	172113783	hsa-mir-199a-2-3p	hsa-mir-199a-2-3p_-1_3_+1_5	mature	0.16		172113694	172113715	TACAGTAGTCTGCACATTGGTT	280	AGGAAGCTTCTGGAGATCCTGCTCCGTCGCCCCAGTGTTCAGACTACCTGTTCAGGACAATGCCGTTGTACAGTAGTCTGCACATTGGTTAGACTGGGCAAGGGAGAGCA
hsa-mir-199a-2	chr1	-	172113674	172113783	hsa-mir-199a-2-5p	hsa-mir-199a-2-5p	mature	0	Y	172113731	172113753	CCCAGTGTTCAGACTACCTGTTC	11	AGGAAGCTTCTGGAGATCCTGCTCCGTCGCCCCAGTGTTCAGACTACCTGTTCAGGACAATGCCGTTGTACAGTAGTCTGCACATTGGTTAGACTGGGCAAGGGAGAGCA
hsa-mir-199b	chr9	-	131006999	131007108	hsa-mir-199b-3p	hsa-mir-199b-3p	mature	0.19	Y	131007023	131007044	ACAGTAGTCTGCACATTGGTTA	512	CCAGAGGACACCTCCACTCCGTCTACCCAGTGTTTAGACTATCTGTTCAGGACTCCCAAATTGTACAGTAGTCTGCACATTGGTTAGGCTGGGCTGGGTTAGACCCTCGG
hsa-mir-199b	chr9	-	131006999	131007108	hsa-mir-199b-3p	hsa-mir-199b-3p_-1_3	mature	0.17		131007024	131007044	ACAGTAGTCTGCACATTGGTT	474	CCAGAGGACACCTCCACTCCGTCTACCCAGTGTTTAGACTATCTGTTCAGGACTCCCAAATTGTACAGTAGTCTGCACATTGGTTAGGCTGGGCTGGGTTAGACCCTCGG
hsa-mir-199b	chr9	-	131006999	131007108	hsa-mir-199b-3p	hsa-mir-199b-3p_-1_3_+1_5	mature	0.1		131007024	131007045	TACAGTAGTCTGCACATTGGTT	280	CCAGAGGACACCTCCACTCCGTCTACCCAGTGTTTAGACTATCTGTTCAGGACTCCCAAATTGTACAGTAGTCTGCACATTGGTTAGGCTGGGCTGGGTTAGACCCTCGG
hsa-mir-199b	chr9	-	131006999	131007108	hsa-mir-199b-5p	hsa-mir-199b-5p	mature	0.25	Y	131007061	131007083	CCCAGTGTTTAGACTATCTGTTC	684	CCAGAGGACACCTCCACTCCGTCTACCCAGTGTTTAGACTATCTGTTCAGGACTCCCAAATTGTACAGTAGTCTGCACATTGGTTAGGCTGGGCTGGGTTAGACCCTCGG
hsa-mir-19a	chr13	+	92003144	92003225	hsa-mir-19a*	hsa-mir-19a*	mature	0	Y	92003157	92003178	AGTTTTGCATAGTTGCACTACA	39	GCAGTCCTCTGTTAGTTTTGCATAGTTGCACTACAAGAAGAATGTAGTTGTGCAAATCTATGCAAAACTGATGGTGGCCTGC
hsa-mir-19a	chr13	+	92003144	92003225	hsa-mir-19a	hsa-mir-19a_-1_3	mature	0.12		92003192	92003213	TGTGCAAATCTATGCAAAACTG	16365	GCAGTCCTCTGTTAGTTTTGCATAGTTGCACTACAAGAAGAATGTAGTTGTGCAAATCTATGCAAAACTGATGGTGGCCTGC
hsa-mir-19a	chr13	+	92003144	92003225	hsa-mir-19a	hsa-mir-19a	mature	0.7	Y	92003192	92003214	TGTGCAAATCTATGCAAAACTGA	93013	GCAGTCCTCTGTTAGTTTTGCATAGTTGCACTACAAGAAGAATGTAGTTGTGCAAATCTATGCAAAACTGATGGTGGCCTGC
hsa-mir-19b-1	chr13	+	92003445	92003531	hsa-mir-19b-1	hsa-mir-19b-1_-1_3	mature	0.19		92003498	92003519	TGTGCAAATCCATGCAAAACTG	66824	CACTGTTCTATGGTTAGTTTTGCAGGTTTGCATCCAGCTGTGTGATATTCTGCTGTGCAAATCCATGCAAAACTGACTGTGGTAGTG
hsa-mir-19b-1	chr13	+	92003445	92003531	hsa-mir-19b-1	hsa-mir-19b-1	mature	0.7	Y	92003498	92003520	TGTGCAAATCCATGCAAAACTGA	237968	CACTGTTCTATGGTTAGTTTTGCAGGTTTGCATCCAGCTGTGTGATATTCTGCTGTGCAAATCCATGCAAAACTGACTGTGGTAGTG
hsa-mir-19b-2	chrX	-	133303700	133303795	hsa-mir-19b-2	hsa-mir-19b-2	mature	0.7	Y	133303712	133303734	TGTGCAAATCCATGCAAAACTGA	237968	ACATTGCTACTTACAATTAGTTTTGCAGGTTTGCATTTCAGCGTATATATGTATATGTGGCTGTGCAAATCCATGCAAAACTGATTGTGATAATGT
hsa-mir-19b-2	chrX	-	133303700	133303795	hsa-mir-19b-2	hsa-mir-19b-2_-1_3	mature	0.19		133303713	133303734	TGTGCAAATCCATGCAAAACTG	66824	ACATTGCTACTTACAATTAGTTTTGCAGGTTTGCATTTCAGCGTATATATGTATATGTGGCTGTGCAAATCCATGCAAAACTGATTGTGATAATGT
hsa-mir-200a	chr1	+	1103242	1103331	hsa-mir-200a*	hsa-mir-200a*	mature	0	Y	1103257	1103278	CATCTTACCGGACAGTGCTGGA	315	CCGGGCCCCTGTGAGCATCTTACCGGACAGTGCTGGATTTCCCAGCTTGACTCTAACACTGTCTGGTAACGATGTTCAAAGGTGACCCGC
hsa-mir-200a	chr1	+	1103242	1103331	hsa-mir-200a	hsa-mir-200a	mature	0.27	Y	1103295	1103316	TAACACTGTCTGGTAACGATGT	50053	CCGGGCCCCTGTGAGCATCTTACCGGACAGTGCTGGATTTCCCAGCTTGACTCTAACACTGTCTGGTAACGATGTTCAAAGGTGACCCGC
hsa-mir-200a	chr1	+	1103242	1103331	hsa-mir-200a	hsa-mir-200a_+1_3	mature	0.56		1103295	1103317	TAACACTGTCTGGTAACGATGTT	103757	CCGGGCCCCTGTGAGCATCTTACCGGACAGTGCTGGATTTCCCAGCTTGACTCTAACACTGTCTGGTAACGATGTTCAAAGGTGACCCGC
hsa-mir-200b	chr1	+	1102483	1102577	hsa-mir-200b*	hsa-mir-200b*	mature	0	Y	1102503	1102524	CATCTTACTGGGCAGCATTGGA	1745	CCAGCTCGGGCAGCCGTGGCCATCTTACTGGGCAGCATTGGATGGAGTCAGGTCTCTAATACTGCCTGGTAATGATGACGGCGGAGCCCTGCACG
hsa-mir-200b	chr1	+	1102483	1102577	hsa-mir-200b	hsa-mir-200b_-1_3	mature	0.1		1102539	1102559	TAATACTGCCTGGTAATGATG	99517	CCAGCTCGGGCAGCCGTGGCCATCTTACTGGGCAGCATTGGATGGAGTCAGGTCTCTAATACTGCCTGGTAATGATGACGGCGGAGCCCTGCACG
hsa-mir-200b	chr1	+	1102483	1102577	hsa-mir-200b	hsa-mir-200b	mature	0.23	Y	1102539	1102560	TAATACTGCCTGGTAATGATGA	211326	CCAGCTCGGGCAGCCGTGGCCATCTTACTGGGCAGCATTGGATGGAGTCAGGTCTCTAATACTGCCTGGTAATGATGACGGCGGAGCCCTGCACG
hsa-mir-200b	chr1	+	1102483	1102577	hsa-mir-200b	hsa-mir-200b_+1_3	mature	0.45		1102539	1102561	TAATACTGCCTGGTAATGATGAC	416174	CCAGCTCGGGCAGCCGTGGCCATCTTACTGGGCAGCATTGGATGGAGTCAGGTCTCTAATACTGCCTGGTAATGATGACGGCGGAGCCCTGCACG
hsa-mir-200b	chr1	+	1102483	1102577	hsa-mir-200b	hsa-mir-200b_+2_3	mature	0.12		1102539	1102562	TAATACTGCCTGGTAATGATGACG	114766	CCAGCTCGGGCAGCCGTGGCCATCTTACTGGGCAGCATTGGATGGAGTCAGGTCTCTAATACTGCCTGGTAATGATGACGGCGGAGCCCTGCACG
hsa-mir-200c	chr12	+	7072861	7072928	hsa-mir-200c*	hsa-mir-200c*	mature	0	Y	7072865	7072886	CGTCTTACCCAGCAGTGTTTGG	110	CCCTCGTCTTACCCAGCAGTGTTTGGGTGCGGTTGGGAGTCTCTAATACTGCCGGGTAATGATGGAGG
hsa-mir-200c	chr12	+	7072861	7072928	hsa-mir-200c	hsa-mir-200c_-1_3	mature	0.27		7072904	7072925	TAATACTGCCGGGTAATGATGG	156204	CCCTCGTCTTACCCAGCAGTGTTTGGGTGCGGTTGGGAGTCTCTAATACTGCCGGGTAATGATGGAGG
hsa-mir-200c	chr12	+	7072861	7072928	hsa-mir-200c	hsa-mir-200c	mature	0.47	Y	7072904	7072926	TAATACTGCCGGGTAATGATGGA	268995	CCCTCGTCTTACCCAGCAGTGTTTGGGTGCGGTTGGGAGTCTCTAATACTGCCGGGTAATGATGGAGG
hsa-mir-202	chr10	-	135061014	135061123	hsa-mir-202*	hsa-mir-202*	mature	0.3	Y	135061075	135061096	TTCCTATGCATATACTTCTTTG	12	CGCCTCAGAGCCGCCCGCCGTTCCTTTTTCCTATGCATATACTTCTTTGAGGATCTGGCCTAAAGAGGTATAGGGCATGGGAAAACGGGGCGGTCGGGTCCTCCCCAGCG
hsa-mir-202	chr10	-	135061014	135061123	hsa-mir-202*	hsa-mir-202*_-1_3	mature	0.57		135061076	135061096	TTCCTATGCATATACTTCTTT	23	CGCCTCAGAGCCGCCCGCCGTTCCTTTTTCCTATGCATATACTTCTTTGAGGATCTGGCCTAAAGAGGTATAGGGCATGGGAAAACGGGGCGGTCGGGTCCTCCCCAGCG
hsa-mir-203	chr14	+	104583741	104583850	hsa-mir-203	hsa-mir-203	mature	0.15	Y	104583805	104583826	GTGAAATGTTTAGGACCACTAG	16651	GTGTTGGGGACTCGCGCGCTGGGTCCAGTGGTTCTTAACAGTTCAACAGTTCTGTAGCGCAATTGTGAAATGTTTAGGACCACTAGACCCGGCGGGCGCGGCGACAGCGA
hsa-mir-203	chr14	+	104583741	104583850	hsa-mir-203	hsa-mir-203_-1_5	mature	0.26		104583806	104583826	TGAAATGTTTAGGACCACTAG	28314	GTGTTGGGGACTCGCGCGCTGGGTCCAGTGGTTCTTAACAGTTCAACAGTTCTGTAGCGCAATTGTGAAATGTTTAGGACCACTAGACCCGGCGGGCGCGGCGACAGCGA
hsa-mir-203	chr14	+	104583741	104583850	hsa-mir-203	hsa-mir-203_+1_3_-1_5	mature	0.4		104583806	104583827	TGAAATGTTTAGGACCACTAGA	43618	GTGTTGGGGACTCGCGCGCTGGGTCCAGTGGTTCTTAACAGTTCAACAGTTCTGTAGCGCAATTGTGAAATGTTTAGGACCACTAGACCCGGCGGGCGCGGCGACAGCGA
hsa-mir-204	chr9	-	73424890	73424999	hsa-mir-204	hsa-mir-204_+1_3	mature	0.23		73424945	73424967	TTCCCTTTGTCATCCTATGCCTG	10	GGCTACAGTCTTTCTTCATGTGACTCGTGGACTTCCCTTTGTCATCCTATGCCTGAGAATATATGAAGGAGGCTGGGAAGGCAAAGGGACGTTCAATTGTCATCACTGGC
hsa-mir-204	chr9	-	73424890	73424999	hsa-mir-204	hsa-mir-204	mature	0.66	Y	73424946	73424967	TTCCCTTTGTCATCCTATGCCT	28	GGCTACAGTCTTTCTTCATGTGACTCGTGGACTTCCCTTTGTCATCCTATGCCTGAGAATATATGAAGGAGGCTGGGAAGGCAAAGGGACGTTCAATTGTCATCACTGGC
hsa-mir-205	chr1	+	209605477	209605586	hsa-mir-205	hsa-mir-205	mature	0.4	Y	209605510	209605531	TCCTTCATTCCACCGGAGTCTG	18894	AAAGATCCTCAGACAATCCATGTGCTTCTCTTGTCCTTCATTCCACCGGAGTCTGTCTCATACCCAACCAGATTTCAGTGGAGTGAAGTTCAGGAGGCATGGAGCTGACA
hsa-mir-205	chr1	+	209605477	209605586	hsa-mir-205	hsa-mir-205_+1_3	mature	0.4		209605510	209605532	TCCTTCATTCCACCGGAGTCTGT	18723	AAAGATCCTCAGACAATCCATGTGCTTCTCTTGTCCTTCATTCCACCGGAGTCTGTCTCATACCCAACCAGATTTCAGTGGAGTGAAGTTCAGGAGGCATGGAGCTGACA
hsa-mir-205	chr1	+	209605477	209605586	hsa-mir-205*	hsa-mir-205*	mature	0	Y	209605547	209605567	GATTTCAGTGGAGTGAAGTTC	171	AAAGATCCTCAGACAATCCATGTGCTTCTCTTGTCCTTCATTCCACCGGAGTCTGTCTCATACCCAACCAGATTTCAGTGGAGTGAAGTTCAGGAGGCATGGAGCTGACA
hsa-mir-20a	chr13	+	92003318	92003388	hsa-mir-20a	hsa-mir-20a	mature	0.7	Y	92003325	92003347	TAAAGTGCTTATAGTGCAGGTAG	136294	GTAGCACTAAAGTGCTTATAGTGCAGGTAGTGTTTAGTTATCTACTGCATTATGAGCACTTAAAGTACTGC
hsa-mir-20a	chr13	+	92003318	92003388	hsa-mir-20a	hsa-mir-20a_+1_3	mature	0.16		92003325	92003348	TAAAGTGCTTATAGTGCAGGTAGT	31750	GTAGCACTAAAGTGCTTATAGTGCAGGTAGTGTTTAGTTATCTACTGCATTATGAGCACTTAAAGTACTGC
hsa-mir-20a	chr13	+	92003318	92003388	hsa-mir-20a*	hsa-mir-20a*	mature	0	Y	92003361	92003382	ACTGCATTATGAGCACTTAAAG	1141	GTAGCACTAAAGTGCTTATAGTGCAGGTAGTGTTTAGTTATCTACTGCATTATGAGCACTTAAAGTACTGC
hsa-mir-20b	chrX	-	133303838	133303906	hsa-mir-20b	hsa-mir-20b	mature	1	Y	133303879	133303901	CAAAGTGCTCATAGTGCAGGTAG	63	AGTACCAAAGTGCTCATAGTGCAGGTAGTTTTGGCATGACTCTACTGTAGTATGGGCACTTCCAGTACT
hsa-mir-21	chr17	+	57918626	57918697	hsa-mir-21	hsa-mir-21	mature	0.47	Y	57918633	57918654	TAGCTTATCAGACTGATGTTGA	440081	TGTCGGGTAGCTTATCAGACTGATGTTGACTGTTGAATCTCATGGCAACACCAGTCGATGGGCTGTCTGACA
hsa-mir-21	chr17	+	57918626	57918697	hsa-mir-21	hsa-mir-21_+1_3	mature	0.45		57918633	57918655	TAGCTTATCAGACTGATGTTGAC	421759	TGTCGGGTAGCTTATCAGACTGATGTTGACTGTTGAATCTCATGGCAACACCAGTCGATGGGCTGTCTGACA
hsa-mir-21	chr17	+	57918626	57918697	hsa-mir-21*	hsa-mir-21*	mature	0	Y	57918671	57918691	CAACACCAGTCGATGGGCTGT	192	TGTCGGGTAGCTTATCAGACTGATGTTGACTGTTGAATCTCATGGCAACACCAGTCGATGGGCTGTCTGACA
hsa-mir-210	chr11	-	568088	568197	hsa-mir-210	hsa-mir-210_+1_3	mature	0.23		568110	568132	CTGTGCGTGTGACAGCGGCTGAT	890	ACCCGGCAGTGCCTCCAGGCGCAGGGCAGCCCCTGCCCACCGCACACTGCGCTGCCCCAGACCCACTGTGCGTGTGACAGCGGCTGATCTGTGCCTGGGCAGCGCGACCC
hsa-mir-210	chr11	-	568088	568197	hsa-mir-210	hsa-mir-210	mature	0.67	Y	568111	568132	CTGTGCGTGTGACAGCGGCTGA	2610	ACCCGGCAGTGCCTCCAGGCGCAGGGCAGCCCCTGCCCACCGCACACTGCGCTGCCCCAGACCCACTGTGCGTGTGACAGCGGCTGATCTGTGCCTGGGCAGCGCGACCC
hsa-mir-211	chr15	-	31357234	31357343	hsa-mir-211	hsa-mir-211_+1_3	mature	0.1		31357296	31357318	TTCCCTTTGTCATCCTTCGCCTA	42	TCACCTGGCCATGTGACTTGTGGGCTTCCCTTTGTCATCCTTCGCCTAGGGCTCTGAGCAGGGCAGGGACAGCAAAGGGGTGCTCAGTTGTCACTTCCCACAGCACGGAG
hsa-mir-211	chr15	-	31357234	31357343	hsa-mir-211	hsa-mir-211	mature	0.68	Y	31357297	31357318	TTCCCTTTGTCATCCTTCGCCT	270	TCACCTGGCCATGTGACTTGTGGGCTTCCCTTTGTCATCCTTCGCCTAGGGCTCTGAGCAGGGCAGGGACAGCAAAGGGGTGCTCAGTTGTCACTTCCCACAGCACGGAG
hsa-mir-2110	chr10	-	115933863	115933937	hsa-mir-2110-star	hsa-mir-2110-star_+1_3_+2_5	star	0.18		115933867	115933889	CACCGCGGTCTTTTCCTCCCACT	78	CAGGGGTTTGGGGAAACGGCCGCTGAGTGAGGCGTCGGCTGTGTTTCTCACCGCGGTCTTTTCCTCCCACTCTTG
hsa-mir-2110	chr10	-	115933863	115933937	hsa-mir-2110-star	hsa-mir-2110-star_+2_5	star	0.21		115933868	115933889	CACCGCGGTCTTTTCCTCCCAC	91	CAGGGGTTTGGGGAAACGGCCGCTGAGTGAGGCGTCGGCTGTGTTTCTCACCGCGGTCTTTTCCTCCCACTCTTG
hsa-mir-2110	chr10	-	115933863	115933937	hsa-mir-2110	hsa-mir-2110_other1	other	0.1		115933869	115933890	TCACCGCGGTCTTTTCCTCCCA	42	CAGGGGTTTGGGGAAACGGCCGCTGAGTGAGGCGTCGGCTGTGTTTCTCACCGCGGTCTTTTCCTCCCACTCTTG
hsa-mir-2110	chr10	-	115933863	115933937	hsa-mir-2110	hsa-mir-2110_+1_3	mature	0.14		115933908	115933930	TTGGGGAAACGGCCGCTGAGTGA	59	CAGGGGTTTGGGGAAACGGCCGCTGAGTGAGGCGTCGGCTGTGTTTCTCACCGCGGTCTTTTCCTCCCACTCTTG
hsa-mir-2110	chr10	-	115933863	115933937	hsa-mir-2110	hsa-mir-2110	mature	0.01	Y	115933909	115933930	TTGGGGAAACGGCCGCTGAGTG	6	CAGGGGTTTGGGGAAACGGCCGCTGAGTGAGGCGTCGGCTGTGTTTCTCACCGCGGTCTTTTCCTCCCACTCTTG
hsa-mir-2116	chr15	-	59463381	59463460	hsa-mir-2116*	hsa-mir-2116*	mature	0.01	Y	59463390	59463410	CCTCCCATGCCAAGAACTCCC	7	GACCTAGGCTAGGGGTTCTTAGCATAGGAGGTCTTCCCATGCTAAGAAGTCCTCCCATGCCAAGAACTCCCAGACTAGGA
hsa-mir-2116	chr15	-	59463381	59463460	hsa-mir-2116*	hsa-mir-2116*_-1_3_+1_5	mature	0.4		59463391	59463411	TCCTCCCATGCCAAGAACTCC	159	GACCTAGGCTAGGGGTTCTTAGCATAGGAGGTCTTCCCATGCTAAGAAGTCCTCCCATGCCAAGAACTCCCAGACTAGGA
hsa-mir-2116	chr15	-	59463381	59463460	hsa-mir-2116*	hsa-mir-2116*_-2_3_+1_5	mature	0.14		59463392	59463411	TCCTCCCATGCCAAGAACTC	58	GACCTAGGCTAGGGGTTCTTAGCATAGGAGGTCTTCCCATGCTAAGAAGTCCTCCCATGCCAAGAACTCCCAGACTAGGA
hsa-mir-2116	chr15	-	59463381	59463460	hsa-mir-2116	hsa-mir-2116_+1_3	mature	0.11		59463426	59463447	GGTTCTTAGCATAGGAGGTCTT	43	GACCTAGGCTAGGGGTTCTTAGCATAGGAGGTCTTCCCATGCTAAGAAGTCCTCCCATGCCAAGAACTCCCAGACTAGGA
hsa-mir-2116	chr15	-	59463381	59463460	hsa-mir-2116	hsa-mir-2116	mature	0.03	Y	59463427	59463447	GGTTCTTAGCATAGGAGGTCT	15	GACCTAGGCTAGGGGTTCTTAGCATAGGAGGTCTTCCCATGCTAAGAAGTCCTCCCATGCCAAGAACTCCCAGACTAGGA
hsa-mir-212	chr17	-	1953564	1953673	hsa-mir-212	hsa-mir-212_+2_3	mature	0.13		1953581	1953603	TAACAGTCTCCAGTCACGGCCAC	90	CGGGGCACCCCGCCCGGACAGCGCGCCGGCACCTTGGCTCTAGACTGCTTACTGCCCGGGCCGCCCTCAGTAACAGTCTCCAGTCACGGCCACCGACGCCTGGCCCCGCC
hsa-mir-212	chr17	-	1953564	1953673	hsa-mir-212	hsa-mir-212_+1_3	mature	0.27		1953582	1953603	TAACAGTCTCCAGTCACGGCCA	187	CGGGGCACCCCGCCCGGACAGCGCGCCGGCACCTTGGCTCTAGACTGCTTACTGCCCGGGCCGCCCTCAGTAACAGTCTCCAGTCACGGCCACCGACGCCTGGCCCCGCC
hsa-mir-212	chr17	-	1953564	1953673	hsa-mir-212	hsa-mir-212	mature	0.24	Y	1953583	1953603	TAACAGTCTCCAGTCACGGCC	166	CGGGGCACCCCGCCCGGACAGCGCGCCGGCACCTTGGCTCTAGACTGCTTACTGCCCGGGCCGCCCTCAGTAACAGTCTCCAGTCACGGCCACCGACGCCTGGCCCCGCC
hsa-mir-212	chr17	-	1953564	1953673	hsa-mir-212-star	hsa-mir-212-star_+1_5	star	0.18		1953621	1953643	ACCTTGGCTCTAGACTGCTTACT	125	CGGGGCACCCCGCCCGGACAGCGCGCCGGCACCTTGGCTCTAGACTGCTTACTGCCCGGGCCGCCCTCAGTAACAGTCTCCAGTCACGGCCACCGACGCCTGGCCCCGCC
hsa-mir-214	chr1	-	172107937	172108046	hsa-mir-214	hsa-mir-214	mature	0.25	Y	172107955	172107976	ACAGCAGGCACAGACAGGCAGT	3	GGCCTGGCTGGACAGAGTTGTCATGTGTCTGCCTGTCTACACTTGCTGTGCAGAACATCCGCTCACCTGTACAGCAGGCACAGACAGGCAGTCACATGACAACCCAGCCT
hsa-mir-214	chr1	-	172107937	172108046	hsa-mir-214	hsa-mir-214_-1_3	mature	0.16		172107956	172107976	ACAGCAGGCACAGACAGGCAG	2	GGCCTGGCTGGACAGAGTTGTCATGTGTCTGCCTGTCTACACTTGCTGTGCAGAACATCCGCTCACCTGTACAGCAGGCACAGACAGGCAGTCACATGACAACCCAGCCT
hsa-mir-214	chr1	-	172107937	172108046	hsa-mir-214	hsa-mir-214_-1_3_+1_5	mature	0.16		172107956	172107977	TACAGCAGGCACAGACAGGCAG	2	GGCCTGGCTGGACAGAGTTGTCATGTGTCTGCCTGTCTACACTTGCTGTGCAGAACATCCGCTCACCTGTACAGCAGGCACAGACAGGCAGTCACATGACAACCCAGCCT
hsa-mir-214	chr1	-	172107937	172108046	hsa-mir-214*	hsa-mir-214*	mature	0.08	Y	172107996	172108017	TGCCTGTCTACACTTGCTGTGC	1	GGCCTGGCTGGACAGAGTTGTCATGTGTCTGCCTGTCTACACTTGCTGTGCAGAACATCCGCTCACCTGTACAGCAGGCACAGACAGGCAGTCACATGACAACCCAGCCT
hsa-mir-215	chr1	-	220291194	220291303	hsa-mir-215	hsa-mir-215_+1_3	mature	0.24		220291256	220291277	ATGACCTATGAATTGACAGACA	84	ATCATTCAGAAATGGTATACAGGAAAATGACCTATGAATTGACAGACAATATAGCTGAGTTTGTCTGTCATTTCTTTAGGCCAATATTCTGTATGACTGTGCTACTTCAA
hsa-mir-215	chr1	-	220291194	220291303	hsa-mir-215	hsa-mir-215	mature	0.27	Y	220291257	220291277	ATGACCTATGAATTGACAGAC	94	ATCATTCAGAAATGGTATACAGGAAAATGACCTATGAATTGACAGACAATATAGCTGAGTTTGTCTGTCATTTCTTTAGGCCAATATTCTGTATGACTGTGCTACTTCAA
hsa-mir-215	chr1	-	220291194	220291303	hsa-mir-215	hsa-mir-215_-1_3	mature	0.16		220291258	220291277	ATGACCTATGAATTGACAGA	57	ATCATTCAGAAATGGTATACAGGAAAATGACCTATGAATTGACAGACAATATAGCTGAGTTTGTCTGTCATTTCTTTAGGCCAATATTCTGTATGACTGTGCTACTTCAA
hsa-mir-215	chr1	-	220291194	220291303	hsa-mir-215	hsa-mir-215_-2_3_-1_5	mature	0.16		220291259	220291276	TGACCTATGAATTGACAG	56	ATCATTCAGAAATGGTATACAGGAAAATGACCTATGAATTGACAGACAATATAGCTGAGTTTGTCTGTCATTTCTTTAGGCCAATATTCTGTATGACTGTGCTACTTCAA
hsa-mir-218-1	chr4	+	20529897	20530006	hsa-mir-218-1	hsa-mir-218-1	mature	0.65	Y	20529921	20529941	TTGTGCTTGATCTAACCATGT	998	GTGATAATGTAGCGAGATTTTCTGTTGTGCTTGATCTAACCATGTGGTTGCGAGGTATGAGTAAAACATGGTTCCGTCAAGCACCATGGAACGTCACGCAGCTTTCTACA
hsa-mir-218-1	chr4	+	20529897	20530006	hsa-mir-218-1	hsa-mir-218-1_+2_3	mature	0.19		20529921	20529943	TTGTGCTTGATCTAACCATGTGG	290	GTGATAATGTAGCGAGATTTTCTGTTGTGCTTGATCTAACCATGTGGTTGCGAGGTATGAGTAAAACATGGTTCCGTCAAGCACCATGGAACGTCACGCAGCTTTCTACA
hsa-mir-218-2	chr5	-	168195150	168195259	hsa-mir-218-2	hsa-mir-218-2_+2_3	mature	0.19		168195213	168195235	TTGTGCTTGATCTAACCATGTGG	290	GACCAGTCGCTGCGGGGCTTTCCTTTGTGCTTGATCTAACCATGTGGTGGAACGATGGAAACGGAACATGGTTCTGTCAAGCACCGCGGAAAGCACCGTGCTCTCCTGCA
hsa-mir-218-2	chr5	-	168195150	168195259	hsa-mir-218-2	hsa-mir-218-2	mature	0.65	Y	168195215	168195235	TTGTGCTTGATCTAACCATGT	998	GACCAGTCGCTGCGGGGCTTTCCTTTGTGCTTGATCTAACCATGTGGTGGAACGATGGAAACGGAACATGGTTCTGTCAAGCACCGCGGAAAGCACCGTGCTCTCCTGCA
hsa-mir-219-1	chr6	+	33175611	33175720	hsa-mir-219-1-5p	hsa-mir-219-1-5p	mature	0.1	Y	33175631	33175651	TGATTGTCCAAACGCAATTCT	8	CCGCCCCGGGCCGCGGCTCCTGATTGTCCAAACGCAATTCTCGAGTCTATGGCTCCGGCCGAGAGTTGAGTCTGGACGTCCCGAGCCGCCGCCCCCAAACCTCGAGCGGG
hsa-mir-219-1	chr6	+	33175611	33175720	hsa-mir-219-1-5p	hsa-mir-219-1-5p_+2_3	mature	0.41		33175631	33175653	TGATTGTCCAAACGCAATTCTCG	33	CCGCCCCGGGCCGCGGCTCCTGATTGTCCAAACGCAATTCTCGAGTCTATGGCTCCGGCCGAGAGTTGAGTCTGGACGTCCCGAGCCGCCGCCCCCAAACCTCGAGCGGG
hsa-mir-219-1	chr6	+	33175611	33175720	hsa-mir-219-1-5p-star	hsa-mir-219-1-5p-star_+2_5	star	0.1		33175672	33175693	AGAGTTGAGTCTGGACGTCCCG	8	CCGCCCCGGGCCGCGGCTCCTGATTGTCCAAACGCAATTCTCGAGTCTATGGCTCCGGCCGAGAGTTGAGTCTGGACGTCCCGAGCCGCCGCCCCCAAACCTCGAGCGGG
hsa-mir-219-2	chr9	-	131154896	131154992	hsa-mir-219-2-5p	hsa-mir-219-2-5p	mature	1	Y	131154954	131154974	TGATTGTCCAAACGCAATTCT	8	ACTCAGGGGCTTCGCCACTGATTGTCCAAACGCAATTCTTGTACGAGTCTGCGGCCAACCGAGAATTGTGGCTGGACATCTGTGGCTGAGCTCCGGG
hsa-mir-22	chr17	-	1617196	1617280	hsa-mir-22	hsa-mir-22	mature	0.86	Y	1617207	1617228	AAGCTGCCAGTTGAAGAACTGT	46879	GGCTGAGCCGCAGTAGTTCTTCAGTGGCAAGCTTTATGTCCTGACCCAGCTAAAGCTGCCAGTTGAAGAACTGTTGCCCTCTGCC
hsa-mir-22	chr17	-	1617196	1617280	hsa-mir-22*	hsa-mir-22*	mature	0.01	Y	1617245	1617266	AGTTCTTCAGTGGCAAGCTTTA	850	GGCTGAGCCGCAGTAGTTCTTCAGTGGCAAGCTTTATGTCCTGACCCAGCTAAAGCTGCCAGTTGAAGAACTGTTGCCCTCTGCC
hsa-mir-221	chrX	-	45605584	45605693	hsa-mir-221	hsa-mir-221	mature	0.39	Y	45605607	45605629	AGCTACATTGTCTGCTGGGTTTC	5509	TGAACATCCAGGTCTGGGGCATGAACCTGGCATACAATGTAGATTTCTGTGTTCGTTAGGCAACAGCTACATTGTCTGCTGGGTTTCAGGCTACCTGGAAACATGTTCTC
hsa-mir-221	chrX	-	45605584	45605693	hsa-mir-221	hsa-mir-221_-1_3	mature	0.44		45605608	45605629	AGCTACATTGTCTGCTGGGTTT	6192	TGAACATCCAGGTCTGGGGCATGAACCTGGCATACAATGTAGATTTCTGTGTTCGTTAGGCAACAGCTACATTGTCTGCTGGGTTTCAGGCTACCTGGAAACATGTTCTC
hsa-mir-221	chrX	-	45605584	45605693	hsa-mir-221*	hsa-mir-221*	mature	0	Y	45605648	45605669	ACCTGGCATACAATGTAGATTT	58	TGAACATCCAGGTCTGGGGCATGAACCTGGCATACAATGTAGATTTCTGTGTTCGTTAGGCAACAGCTACATTGTCTGCTGGGTTTCAGGCTACCTGGAAACATGTTCTC
hsa-mir-222	chrX	-	45606420	45606529	hsa-mir-222	hsa-mir-222_other1	other	0.15		45606437	45606461	AGCTACATCTGGCTACTGGGTCTCT	2810	GCTGCTGGAAGGTGTAGGTACCCTCAATGGCTCAGTAGCCAGTGTAGATCCTGTCTTTCGTAATCAGCAGCTACATCTGGCTACTGGGTCTCTGATGGCATCTTCTAGCT
hsa-mir-222	chrX	-	45606420	45606529	hsa-mir-222	hsa-mir-222_+3_3	mature	0.26		45606438	45606461	AGCTACATCTGGCTACTGGGTCTC	4829	GCTGCTGGAAGGTGTAGGTACCCTCAATGGCTCAGTAGCCAGTGTAGATCCTGTCTTTCGTAATCAGCAGCTACATCTGGCTACTGGGTCTCTGATGGCATCTTCTAGCT
hsa-mir-222	chrX	-	45606420	45606529	hsa-mir-222	hsa-mir-222_+2_3	mature	0.36		45606439	45606461	AGCTACATCTGGCTACTGGGTCT	6560	GCTGCTGGAAGGTGTAGGTACCCTCAATGGCTCAGTAGCCAGTGTAGATCCTGTCTTTCGTAATCAGCAGCTACATCTGGCTACTGGGTCTCTGATGGCATCTTCTAGCT
hsa-mir-222	chrX	-	45606420	45606529	hsa-mir-222	hsa-mir-222	mature	0.09	Y	45606441	45606461	AGCTACATCTGGCTACTGGGT	1765	GCTGCTGGAAGGTGTAGGTACCCTCAATGGCTCAGTAGCCAGTGTAGATCCTGTCTTTCGTAATCAGCAGCTACATCTGGCTACTGGGTCTCTGATGGCATCTTCTAGCT
hsa-mir-223	chrX	+	65238711	65238820	hsa-mir-223	hsa-mir-223_-3_3	mature	0.11		65238778	65238796	TGTCAGTTTGTCAAATACC	1	CCTGGCCTCCTGCAGTGCCACGCTCCGTGTATTTGACAAGCTGAGTTGGACACTCCATGTGGTAGAGTGTCAGTTTGTCAAATACCCCAAGTGCGGCACATGCTTACCAG
hsa-mir-223	chrX	+	65238711	65238820	hsa-mir-223	hsa-mir-223_-2_3	mature	0.33		65238778	65238797	TGTCAGTTTGTCAAATACCC	3	CCTGGCCTCCTGCAGTGCCACGCTCCGTGTATTTGACAAGCTGAGTTGGACACTCCATGTGGTAGAGTGTCAGTTTGTCAAATACCCCAAGTGCGGCACATGCTTACCAG
hsa-mir-223	chrX	+	65238711	65238820	hsa-mir-223	hsa-mir-223	mature	0.33	Y	65238778	65238799	TGTCAGTTTGTCAAATACCCCA	3	CCTGGCCTCCTGCAGTGCCACGCTCCGTGTATTTGACAAGCTGAGTTGGACACTCCATGTGGTAGAGTGTCAGTTTGTCAAATACCCCAAGTGCGGCACATGCTTACCAG
hsa-mir-223	chrX	+	65238711	65238820	hsa-mir-223	hsa-mir-223_-1_3_-1_5	mature	0.11		65238779	65238798	GTCAGTTTGTCAAATACCCC	1	CCTGGCCTCCTGCAGTGCCACGCTCCGTGTATTTGACAAGCTGAGTTGGACACTCCATGTGGTAGAGTGTCAGTTTGTCAAATACCCCAAGTGCGGCACATGCTTACCAG
hsa-mir-223	chrX	+	65238711	65238820	hsa-mir-223	hsa-mir-223_+1_3_-1_5	mature	0.11		65238779	65238800	GTCAGTTTGTCAAATACCCCAA	1	CCTGGCCTCCTGCAGTGCCACGCTCCGTGTATTTGACAAGCTGAGTTGGACACTCCATGTGGTAGAGTGTCAGTTTGTCAAATACCCCAAGTGCGGCACATGCTTACCAG
hsa-mir-2276	chr13	+	24736554	24736642	hsa-mir-2276	hsa-mir-2276_-1_3	mature	0.16		24736607	24736627	TCTGCAAGTGTCAGAGGCGAG	4	GTGTTCTTCCAGTCCGCCCTCTGTCACCTTGCAGACGGCTTTCTCTCCGAATGTCTGCAAGTGTCAGAGGCGAGGAGTGGCAGCTGCAT
hsa-mir-2276	chr13	+	24736554	24736642	hsa-mir-2276	hsa-mir-2276	mature	0.68	Y	24736607	24736628	TCTGCAAGTGTCAGAGGCGAGG	17	GTGTTCTTCCAGTCCGCCCTCTGTCACCTTGCAGACGGCTTTCTCTCCGAATGTCTGCAAGTGTCAGAGGCGAGGAGTGGCAGCTGCAT
hsa-mir-2277	chr5	-	92956401	92956493	hsa-mir-2277-3p	hsa-mir-2277-3p_+1_3	mature	0.33		92956414	92956435	TGACAGCGCCCTGCCTGGCTCG	37	GTGCTTCCTGCGGGCTGAGCGCGGGCTGAGCGCTGCCAGTCAGCGCTCACATTAAGGCTGACAGCGCCCTGCCTGGCTCGGCCGGCGAAGCTC
hsa-mir-2277	chr5	-	92956401	92956493	hsa-mir-2277-3p	hsa-mir-2277-3p	mature	0.08	Y	92956415	92956435	TGACAGCGCCCTGCCTGGCTC	9	GTGCTTCCTGCGGGCTGAGCGCGGGCTGAGCGCTGCCAGTCAGCGCTCACATTAAGGCTGACAGCGCCCTGCCTGGCTCGGCCGGCGAAGCTC
hsa-mir-2277	chr5	-	92956401	92956493	hsa-mir-2277-5p	hsa-mir-2277-5p	mature	0.09	Y	92956453	92956476	AGCGCGGGCTGAGCGCTGCCAGTC	10	GTGCTTCCTGCGGGCTGAGCGCGGGCTGAGCGCTGCCAGTCAGCGCTCACATTAAGGCTGACAGCGCCCTGCCTGGCTCGGCCGGCGAAGCTC
hsa-mir-2277	chr5	-	92956401	92956493	hsa-mir-2277-5p	hsa-mir-2277-5p_-1_3	mature	0.26		92956454	92956476	AGCGCGGGCTGAGCGCTGCCAGT	29	GTGCTTCCTGCGGGCTGAGCGCGGGCTGAGCGCTGCCAGTCAGCGCTCACATTAAGGCTGACAGCGCCCTGCCTGGCTCGGCCGGCGAAGCTC
hsa-mir-2355	chr2	-	207974710	207974796	hsa-mir-2355-5p-star	hsa-mir-2355-5p-star_+1_5	star	0.1		207974720	207974741	TGTCCTTGCTGTTTGGAGATAA	13	CAGACGTGTCATCCCCAGATACAATGGACAATATGCTATTATAATCGTATGGCATTGTCCTTGCTGTTTGGAGATAATACTGCTGAC
hsa-mir-2355	chr2	-	207974710	207974796	hsa-mir-2355-3p	hsa-mir-2355-3p	mature	0.16	Y	207974722	207974743	ATTGTCCTTGCTGTTTGGAGAT	21	CAGACGTGTCATCCCCAGATACAATGGACAATATGCTATTATAATCGTATGGCATTGTCCTTGCTGTTTGGAGATAATACTGCTGAC
hsa-mir-2355	chr2	-	207974710	207974796	hsa-mir-2355-5p	hsa-mir-2355-5p_+1_3	mature	0.21		207974765	207974786	ATCCCCAGATACAATGGACAAT	28	CAGACGTGTCATCCCCAGATACAATGGACAATATGCTATTATAATCGTATGGCATTGTCCTTGCTGTTTGGAGATAATACTGCTGAC
hsa-mir-2355	chr2	-	207974710	207974796	hsa-mir-2355-5p	hsa-mir-2355-5p	mature	0.1	Y	207974766	207974786	ATCCCCAGATACAATGGACAA	13	CAGACGTGTCATCCCCAGATACAATGGACAATATGCTATTATAATCGTATGGCATTGTCCTTGCTGTTTGGAGATAATACTGCTGAC
hsa-mir-23a	chr19	-	13947400	13947472	hsa-mir-23a	hsa-mir-23a_+1_3	mature	0.17		13947407	13947428	ATCACATTGCCAGGGATTTCCA	49939	GGCCGGCTGGGGTTCCTGGGGATGGGATTTGCTTCCTGTCACAAATCACATTGCCAGGGATTTCCAACCGACC
hsa-mir-23a	chr19	-	13947400	13947472	hsa-mir-23a	hsa-mir-23a	mature	0.21	Y	13947408	13947428	ATCACATTGCCAGGGATTTCC	59449	GGCCGGCTGGGGTTCCTGGGGATGGGATTTGCTTCCTGTCACAAATCACATTGCCAGGGATTTCCAACCGACC
hsa-mir-23a	chr19	-	13947400	13947472	hsa-mir-23a	hsa-mir-23a_-1_3	mature	0.35		13947409	13947428	ATCACATTGCCAGGGATTTC	100538	GGCCGGCTGGGGTTCCTGGGGATGGGATTTGCTTCCTGTCACAAATCACATTGCCAGGGATTTCCAACCGACC
hsa-mir-23a	chr19	-	13947400	13947472	hsa-mir-23a	hsa-mir-23a_-2_3	mature	0.11		13947410	13947428	ATCACATTGCCAGGGATTT	31603	GGCCGGCTGGGGTTCCTGGGGATGGGATTTGCTTCCTGTCACAAATCACATTGCCAGGGATTTCCAACCGACC
hsa-mir-23a	chr19	-	13947400	13947472	hsa-mir-23a*	hsa-mir-23a*	mature	0	Y	13947443	13947464	GGGGTTCCTGGGGATGGGATTT	29	GGCCGGCTGGGGTTCCTGGGGATGGGATTTGCTTCCTGTCACAAATCACATTGCCAGGGATTTCCAACCGACC
hsa-mir-23b	chr9	+	97847489	97847585	hsa-mir-23b*	hsa-mir-23b*	mature	0	Y	97847508	97847529	TGGGTTCCTGGCATGCTGATTT	5	CTCAGGTGCTCTGGCTGCTTGGGTTCCTGGCATGCTGATTTGTGACTTAAGATTAAAATCACATTGCCAGGGATTACCACGCAACCACGACCTTGGC
hsa-mir-23b	chr9	+	97847489	97847585	hsa-mir-23b	hsa-mir-23b_-3_3	mature	0.2		97847546	97847563	ATCACATTGCCAGGGATT	7713	CTCAGGTGCTCTGGCTGCTTGGGTTCCTGGCATGCTGATTTGTGACTTAAGATTAAAATCACATTGCCAGGGATTACCACGCAACCACGACCTTGGC
hsa-mir-23b	chr9	+	97847489	97847585	hsa-mir-23b	hsa-mir-23b_-1_3	mature	0.14		97847546	97847565	ATCACATTGCCAGGGATTAC	5526	CTCAGGTGCTCTGGCTGCTTGGGTTCCTGGCATGCTGATTTGTGACTTAAGATTAAAATCACATTGCCAGGGATTACCACGCAACCACGACCTTGGC
hsa-mir-23b	chr9	+	97847489	97847585	hsa-mir-23b	hsa-mir-23b	mature	0.12	Y	97847546	97847566	ATCACATTGCCAGGGATTACC	4588	CTCAGGTGCTCTGGCTGCTTGGGTTCCTGGCATGCTGATTTGTGACTTAAGATTAAAATCACATTGCCAGGGATTACCACGCAACCACGACCTTGGC
hsa-mir-23b	chr9	+	97847489	97847585	hsa-mir-23b	hsa-mir-23b_+1_3	mature	0.16		97847546	97847567	ATCACATTGCCAGGGATTACCA	6229	CTCAGGTGCTCTGGCTGCTTGGGTTCCTGGCATGCTGATTTGTGACTTAAGATTAAAATCACATTGCCAGGGATTACCACGCAACCACGACCTTGGC
hsa-mir-23b	chr9	+	97847489	97847585	hsa-mir-23b	hsa-mir-23b_+2_3	mature	0.14		97847546	97847568	ATCACATTGCCAGGGATTACCAC	5522	CTCAGGTGCTCTGGCTGCTTGGGTTCCTGGCATGCTGATTTGTGACTTAAGATTAAAATCACATTGCCAGGGATTACCACGCAACCACGACCTTGGC
hsa-mir-23b	chr9	+	97847489	97847585	hsa-mir-23b	hsa-mir-23b_+3_3	mature	0.1		97847546	97847569	ATCACATTGCCAGGGATTACCACG	3933	CTCAGGTGCTCTGGCTGCTTGGGTTCCTGGCATGCTGATTTGTGACTTAAGATTAAAATCACATTGCCAGGGATTACCACGCAACCACGACCTTGGC
hsa-mir-23c	chrX	-	20035205	20035304	hsa-mir-23c	hsa-mir-23c_-1_3	mature	0.47		20035219	20035239	ATCACATTGCCAGTGATTACC	1074	AGTGACTTTCCAGGTGTCACACAGTGAGTGGCATAATCAGAGTACAATTTGAGTCATGCCCATACATCACATTGCCAGTGATTACCCAAGGAAAGTGACG
hsa-mir-23c	chrX	-	20035205	20035304	hsa-mir-23c	hsa-mir-23c_-2_3	mature	0.37		20035220	20035239	ATCACATTGCCAGTGATTAC	843	AGTGACTTTCCAGGTGTCACACAGTGAGTGGCATAATCAGAGTACAATTTGAGTCATGCCCATACATCACATTGCCAGTGATTACCCAAGGAAAGTGACG
hsa-mir-23c	chrX	-	20035205	20035304	hsa-mir-23c	hsa-mir-23c_-3_3	mature	0.11		20035221	20035239	ATCACATTGCCAGTGATTA	266	AGTGACTTTCCAGGTGTCACACAGTGAGTGGCATAATCAGAGTACAATTTGAGTCATGCCCATACATCACATTGCCAGTGATTACCCAAGGAAAGTGACG
hsa-mir-24-1	chr9	+	97848302	97848369	hsa-mir-24-1	hsa-mir-24-1_-2_3	mature	0.21		97848345	97848364	TGGCTCAGTTCAGCAGGAAC	27112	CTCCGGTGCCTACTGAGCTGATATCAGTTCTCATTTTACACACTGGCTCAGTTCAGCAGGAACAGGAG
hsa-mir-24-1	chr9	+	97848302	97848369	hsa-mir-24-1	hsa-mir-24-1	mature	0.24	Y	97848345	97848366	TGGCTCAGTTCAGCAGGAACAG	30696	CTCCGGTGCCTACTGAGCTGATATCAGTTCTCATTTTACACACTGGCTCAGTTCAGCAGGAACAGGAG
hsa-mir-24-1	chr9	+	97848302	97848369	hsa-mir-24-1	hsa-mir-24-1_+1_3	mature	0.4		97848345	97848367	TGGCTCAGTTCAGCAGGAACAGG	50532	CTCCGGTGCCTACTGAGCTGATATCAGTTCTCATTTTACACACTGGCTCAGTTCAGCAGGAACAGGAG
hsa-mir-24-2	chr19	-	13947100	13947172	hsa-mir-24-2	hsa-mir-24-2_+1_3	mature	0.4		13947101	13947123	TGGCTCAGTTCAGCAGGAACAGG	50532	CTCTGCCTCCCGTGCCTACTGAGCTGAAACACAGTTGGTTTGTGTACACTGGCTCAGTTCAGCAGGAACAGGG
hsa-mir-24-2	chr19	-	13947100	13947172	hsa-mir-24-2	hsa-mir-24-2	mature	0.24	Y	13947102	13947123	TGGCTCAGTTCAGCAGGAACAG	30696	CTCTGCCTCCCGTGCCTACTGAGCTGAAACACAGTTGGTTTGTGTACACTGGCTCAGTTCAGCAGGAACAGGG
hsa-mir-24-2	chr19	-	13947100	13947172	hsa-mir-24-2	hsa-mir-24-2_-2_3	mature	0.21		13947104	13947123	TGGCTCAGTTCAGCAGGAAC	27112	CTCTGCCTCCCGTGCCTACTGAGCTGAAACACAGTTGGTTTGTGTACACTGGCTCAGTTCAGCAGGAACAGGG
hsa-mir-25	chr7	-	99691182	99691265	hsa-mir-25	hsa-mir-25	mature	0.8	Y	99691193	99691214	CATTGCACTTGTCTCGGTCTGA	249491	GGCCAGTGTTGAGAGGCGGAGACTTGGGCAATTGCTGGACGCTGCCCTGGGCATTGCACTTGTCTCGGTCTGACAGTGCCGGCC
hsa-mir-25	chr7	-	99691182	99691265	hsa-mir-25*	hsa-mir-25*	mature	0	Y	99691232	99691252	AGGCGGAGACTTGGGCAATTG	74	GGCCAGTGTTGAGAGGCGGAGACTTGGGCAATTGCTGGACGCTGCCCTGGGCATTGCACTTGTCTCGGTCTGACAGTGCCGGCC
hsa-mir-26a-1	chr3	+	38010894	38010970	hsa-mir-26a-1	hsa-mir-26a-1_-2_3	mature	0.11		38010903	38010922	TTCAAGTAATCCAGGATAGG	65651	GTGGCCTCGTTCAAGTAATCCAGGATAGGCTGTGCAGGTCCCAATGGGCCTATTCTTGGTTACTTGCACGGGGACGC
hsa-mir-26a-1	chr3	+	38010894	38010970	hsa-mir-26a-1	hsa-mir-26a-1_-1_3	mature	0.1		38010903	38010923	TTCAAGTAATCCAGGATAGGC	57664	GTGGCCTCGTTCAAGTAATCCAGGATAGGCTGTGCAGGTCCCAATGGGCCTATTCTTGGTTACTTGCACGGGGACGC
hsa-mir-26a-1	chr3	+	38010894	38010970	hsa-mir-26a-1	hsa-mir-26a-1	mature	0.58	Y	38010903	38010924	TTCAAGTAATCCAGGATAGGCT	322678	GTGGCCTCGTTCAAGTAATCCAGGATAGGCTGTGCAGGTCCCAATGGGCCTATTCTTGGTTACTTGCACGGGGACGC
hsa-mir-26a-1	chr3	+	38010894	38010970	hsa-mir-26a-1	hsa-mir-26a-1_+1_3	mature	0.11		38010903	38010925	TTCAAGTAATCCAGGATAGGCTG	65952	GTGGCCTCGTTCAAGTAATCCAGGATAGGCTGTGCAGGTCCCAATGGGCCTATTCTTGGTTACTTGCACGGGGACGC
hsa-mir-26a-2	chr12	-	58218391	58218474	hsa-mir-26a-2	hsa-mir-26a-2_+1_3	mature	0.11		58218439	58218461	TTCAAGTAATCCAGGATAGGCTG	65952	GGCTGTGGCTGGATTCAAGTAATCCAGGATAGGCTGTTTCCATCTGTGAGGCCTATTCTTGATTACTTGTTTCTGGAGGCAGCT
hsa-mir-26a-2	chr12	-	58218391	58218474	hsa-mir-26a-2	hsa-mir-26a-2	mature	0.57	Y	58218440	58218461	TTCAAGTAATCCAGGATAGGCT	322678	GGCTGTGGCTGGATTCAAGTAATCCAGGATAGGCTGTTTCCATCTGTGAGGCCTATTCTTGATTACTTGTTTCTGGAGGCAGCT
hsa-mir-26a-2	chr12	-	58218391	58218474	hsa-mir-26a-2	hsa-mir-26a-2_-1_3	mature	0.1		58218441	58218461	TTCAAGTAATCCAGGATAGGC	57664	GGCTGTGGCTGGATTCAAGTAATCCAGGATAGGCTGTTTCCATCTGTGAGGCCTATTCTTGATTACTTGTTTCTGGAGGCAGCT
hsa-mir-26a-2	chr12	-	58218391	58218474	hsa-mir-26a-2	hsa-mir-26a-2_-2_3	mature	0.11		58218442	58218461	TTCAAGTAATCCAGGATAGG	65651	GGCTGTGGCTGGATTCAAGTAATCCAGGATAGGCTGTTTCCATCTGTGAGGCCTATTCTTGATTACTTGTTTCTGGAGGCAGCT
hsa-mir-26b	chr2	+	219267368	219267444	hsa-mir-26b	hsa-mir-26b	mature	0.19	Y	219267379	219267399	TTCAAGTAATTCAGGATAGGT	57984	CCGGGACCCAGTTCAAGTAATTCAGGATAGGTTGTGTGCTGTCCAGCCTGTTCTCCATTACTTGGCTCGGGGACCGG
hsa-mir-26b	chr2	+	219267368	219267444	hsa-mir-26b	hsa-mir-26b_+1_3	mature	0.65		219267379	219267400	TTCAAGTAATTCAGGATAGGTT	195833	CCGGGACCCAGTTCAAGTAATTCAGGATAGGTTGTGTGCTGTCCAGCCTGTTCTCCATTACTTGGCTCGGGGACCGG
hsa-mir-26b	chr2	+	219267368	219267444	hsa-mir-26b*	hsa-mir-26b*	mature	0	Y	219267414	219267435	CCTGTTCTCCATTACTTGGCTC	2730	CCGGGACCCAGTTCAAGTAATTCAGGATAGGTTGTGTGCTGTCCAGCCTGTTCTCCATTACTTGGCTCGGGGACCGG
hsa-mir-27a	chr19	-	13947253	13947330	hsa-mir-27a	hsa-mir-27a	mature	0.28	Y	13947260	13947280	TTCACAGTGGCTAAGTTCCGC	83087	CTGAGGAGCAGGGCTTAGCTGCTTGTGAGCAGGGTCCACACCAAGTCGTGTTCACAGTGGCTAAGTTCCGCCCCCCAG
hsa-mir-27a	chr19	-	13947253	13947330	hsa-mir-27a	hsa-mir-27a_-1_3	mature	0.43		13947261	13947280	TTCACAGTGGCTAAGTTCCG	125878	CTGAGGAGCAGGGCTTAGCTGCTTGTGAGCAGGGTCCACACCAAGTCGTGTTCACAGTGGCTAAGTTCCGCCCCCCAG
hsa-mir-27a	chr19	-	13947253	13947330	hsa-mir-27a*	hsa-mir-27a*	mature	0	Y	13947300	13947321	AGGGCTTAGCTGCTTGTGAGCA	633	CTGAGGAGCAGGGCTTAGCTGCTTGTGAGCAGGGTCCACACCAAGTCGTGTTCACAGTGGCTAAGTTCCGCCCCCCAG
hsa-mir-27b	chr9	+	97847726	97847822	hsa-mir-27b*	hsa-mir-27b*	mature	0	Y	97847744	97847765	AGAGCTTAGCTGATTGGTGAAC	362	ACCTCTCTAACAAGGTGCAGAGCTTAGCTGATTGGTGAACAGTGATTGGTTTCCGCTTTGTTCACAGTGGCTAAGTTCTGCACCTGAAGAGAAGGTG
hsa-mir-27b	chr9	+	97847726	97847822	hsa-mir-27b	hsa-mir-27b_-3_3	mature	0.24		97847786	97847803	TTCACAGTGGCTAAGTTC	17570	ACCTCTCTAACAAGGTGCAGAGCTTAGCTGATTGGTGAACAGTGATTGGTTTCCGCTTTGTTCACAGTGGCTAAGTTCTGCACCTGAAGAGAAGGTG
hsa-mir-27b	chr9	+	97847726	97847822	hsa-mir-27b	hsa-mir-27b_-2_3	mature	0.11		97847786	97847804	TTCACAGTGGCTAAGTTCT	8501	ACCTCTCTAACAAGGTGCAGAGCTTAGCTGATTGGTGAACAGTGATTGGTTTCCGCTTTGTTCACAGTGGCTAAGTTCTGCACCTGAAGAGAAGGTG
hsa-mir-27b	chr9	+	97847726	97847822	hsa-mir-27b	hsa-mir-27b_-1_3	mature	0.1		97847786	97847805	TTCACAGTGGCTAAGTTCTG	7935	ACCTCTCTAACAAGGTGCAGAGCTTAGCTGATTGGTGAACAGTGATTGGTTTCCGCTTTGTTCACAGTGGCTAAGTTCTGCACCTGAAGAGAAGGTG
hsa-mir-27b	chr9	+	97847726	97847822	hsa-mir-27b	hsa-mir-27b	mature	0.21	Y	97847786	97847806	TTCACAGTGGCTAAGTTCTGC	15726	ACCTCTCTAACAAGGTGCAGAGCTTAGCTGATTGGTGAACAGTGATTGGTTTCCGCTTTGTTCACAGTGGCTAAGTTCTGCACCTGAAGAGAAGGTG
hsa-mir-27b	chr9	+	97847726	97847822	hsa-mir-27b	hsa-mir-27b_+1_3	mature	0.12		97847786	97847807	TTCACAGTGGCTAAGTTCTGCA	9188	ACCTCTCTAACAAGGTGCAGAGCTTAGCTGATTGGTGAACAGTGATTGGTTTCCGCTTTGTTCACAGTGGCTAAGTTCTGCACCTGAAGAGAAGGTG
hsa-mir-28	chr3	+	188406568	188406653	hsa-mir-28-5p	hsa-mir-28-5p	mature	0.15	Y	188406581	188406602	AAGGAGCTCACAGTCTATTGAG	7901	GGTCCTTGCCCTCAAGGAGCTCACAGTCTATTGAGTTACCTTTCTGACTTTCCCACTAGATTGTGAGCTCCTGGAGGGCAGGCACT
hsa-mir-28	chr3	+	188406568	188406653	hsa-mir-28-3p	hsa-mir-28-3p	mature	0.35	Y	188406621	188406642	CACTAGATTGTGAGCTCCTGGA	17716	GGTCCTTGCCCTCAAGGAGCTCACAGTCTATTGAGTTACCTTTCTGACTTTCCCACTAGATTGTGAGCTCCTGGAGGGCAGGCACT
hsa-mir-28	chr3	+	188406568	188406653	hsa-mir-28-3p	hsa-mir-28-3p_+1_3	mature	0.19		188406621	188406643	CACTAGATTGTGAGCTCCTGGAG	9824	GGTCCTTGCCCTCAAGGAGCTCACAGTCTATTGAGTTACCTTTCTGACTTTCCCACTAGATTGTGAGCTCCTGGAGGGCAGGCACT
hsa-mir-296	chr20	-	57392669	57392748	hsa-mir-296-3p	hsa-mir-296-3p	mature	0	Y	57392680	57392701	GAGGGTTGGGTGGAGGCTCTCC	32	AGGACCCTTCCAGAGGGCCCCCCCTCAATCCTGTTGTGCCTAATTCAGAGGGTTGGGTGGAGGCTCTCCTGAAGGGCTCT
hsa-mir-296	chr20	-	57392669	57392748	hsa-mir-296-5p	hsa-mir-296-5p	mature	0.71	Y	57392715	57392735	AGGGCCCCCCCTCAATCCTGT	2971	AGGACCCTTCCAGAGGGCCCCCCCTCAATCCTGTTGTGCCTAATTCAGAGGGTTGGGTGGAGGCTCTCCTGAAGGGCTCT
hsa-mir-296	chr20	-	57392669	57392748	hsa-mir-296-5p	hsa-mir-296-5p_+1_5	mature	0.11		57392715	57392736	GAGGGCCCCCCCTCAATCCTGT	493	AGGACCCTTCCAGAGGGCCCCCCCTCAATCCTGTTGTGCCTAATTCAGAGGGTTGGGTGGAGGCTCTCCTGAAGGGCTCT
hsa-mir-29a	chr7	-	130561505	130561568	hsa-mir-29a	hsa-mir-29a_+1_3	mature	0.1		130561505	130561527	TAGCACCATCTGAAATCGGTTAT	15343	ATGACTGATTTCTTTTGGTGTTCAGAGTCAATATAATTTTCTAGCACCATCTGAAATCGGTTAT
hsa-mir-29a	chr7	-	130561505	130561568	hsa-mir-29a	hsa-mir-29a	mature	0.58	Y	130561506	130561527	TAGCACCATCTGAAATCGGTTA	82237	ATGACTGATTTCTTTTGGTGTTCAGAGTCAATATAATTTTCTAGCACCATCTGAAATCGGTTAT
hsa-mir-29a	chr7	-	130561505	130561568	hsa-mir-29a	hsa-mir-29a_-1_3	mature	0.15		130561507	130561527	TAGCACCATCTGAAATCGGTT	21690	ATGACTGATTTCTTTTGGTGTTCAGAGTCAATATAATTTTCTAGCACCATCTGAAATCGGTTAT
hsa-mir-29a	chr7	-	130561505	130561568	hsa-mir-29a*	hsa-mir-29a*	mature	0.01	Y	130561544	130561565	ACTGATTTCTTTTGGTGTTCAG	1790	ATGACTGATTTCTTTTGGTGTTCAGAGTCAATATAATTTTCTAGCACCATCTGAAATCGGTTAT
hsa-mir-29b-1	chr7	-	130562217	130562297	hsa-mir-29b-1	hsa-mir-29b-1	mature	0.33	Y	130562225	130562247	TAGCACCATTTGAAATCAGTGTT	4156	CTTCAGGAAGCTGGTTTCATATGGTGGTTTAGATTTAAATAGTGATTGTCTAGCACCATTTGAAATCAGTGTTCTTGGGGG
hsa-mir-29b-1	chr7	-	130562217	130562297	hsa-mir-29b-1	hsa-mir-29b-1_-1_3	mature	0.19		130562226	130562247	TAGCACCATTTGAAATCAGTGT	2416	CTTCAGGAAGCTGGTTTCATATGGTGGTTTAGATTTAAATAGTGATTGTCTAGCACCATTTGAAATCAGTGTTCTTGGGGG
hsa-mir-29b-1	chr7	-	130562217	130562297	hsa-mir-29b-1	hsa-mir-29b-1_-3_3	mature	0.1		130562228	130562247	TAGCACCATTTGAAATCAGT	1261	CTTCAGGAAGCTGGTTTCATATGGTGGTTTAGATTTAAATAGTGATTGTCTAGCACCATTTGAAATCAGTGTTCTTGGGGG
hsa-mir-29b-2	chr1	-	207975787	207975867	hsa-mir-29b-2	hsa-mir-29b-2_+1_3	mature	0.1		207975793	207975816	TAGCACCATTTGAAATCAGTGTTT	1331	CTTCTGGAAGCTGGTTTCACATGGTGGCTTAGATTTTTCCATCTTTGTATCTAGCACCATTTGAAATCAGTGTTTTAGGAG
hsa-mir-29b-2	chr1	-	207975787	207975867	hsa-mir-29b-2	hsa-mir-29b-2	mature	0.32	Y	207975794	207975816	TAGCACCATTTGAAATCAGTGTT	4156	CTTCTGGAAGCTGGTTTCACATGGTGGCTTAGATTTTTCCATCTTTGTATCTAGCACCATTTGAAATCAGTGTTTTAGGAG
hsa-mir-29b-2	chr1	-	207975787	207975867	hsa-mir-29b-2	hsa-mir-29b-2_-1_3	mature	0.19		207975795	207975816	TAGCACCATTTGAAATCAGTGT	2416	CTTCTGGAAGCTGGTTTCACATGGTGGCTTAGATTTTTCCATCTTTGTATCTAGCACCATTTGAAATCAGTGTTTTAGGAG
hsa-mir-29c	chr1	-	207975196	207975283	hsa-mir-29c	hsa-mir-29c_+1_3	mature	0.12		207975208	207975230	TAGCACCATTTGAAATCGGTTAT	4519	ATCTCTTACACAGGCTGACCGATTTCTCCTGGTGTTCAGAGTCTGTTTTTGTCTAGCACCATTTGAAATCGGTTATGATGTAGGGGGA
hsa-mir-29c	chr1	-	207975196	207975283	hsa-mir-29c	hsa-mir-29c	mature	0.57	Y	207975209	207975230	TAGCACCATTTGAAATCGGTTA	20437	ATCTCTTACACAGGCTGACCGATTTCTCCTGGTGTTCAGAGTCTGTTTTTGTCTAGCACCATTTGAAATCGGTTATGATGTAGGGGGA
hsa-mir-29c	chr1	-	207975196	207975283	hsa-mir-29c	hsa-mir-29c_-1_3	mature	0.2		207975210	207975230	TAGCACCATTTGAAATCGGTT	7399	ATCTCTTACACAGGCTGACCGATTTCTCCTGGTGTTCAGAGTCTGTTTTTGTCTAGCACCATTTGAAATCGGTTATGATGTAGGGGGA
hsa-mir-29c	chr1	-	207975196	207975283	hsa-mir-29c*	hsa-mir-29c*	mature	0	Y	207975247	207975268	TGACCGATTTCTCCTGGTGTTC	88	ATCTCTTACACAGGCTGACCGATTTCTCCTGGTGTTCAGAGTCTGTTTTTGTCTAGCACCATTTGAAATCGGTTATGATGTAGGGGGA
hsa-mir-301a	chr17	-	57228496	57228581	hsa-mir-301a	hsa-mir-301a	mature	0.74	Y	57228509	57228531	CAGTGCAATAGTATTGTCAAAGC	6790	ACTGCTAACGAATGCTCTGACTTTATTGCACTACTGTACTTTACAGCTAGCAGTGCAATAGTATTGTCAAAGCATCTGAAAGCAGG
hsa-mir-301a	chr17	-	57228496	57228581	hsa-mir-301a	hsa-mir-301a_-1_3	mature	0.12		57228510	57228531	CAGTGCAATAGTATTGTCAAAG	1152	ACTGCTAACGAATGCTCTGACTTTATTGCACTACTGTACTTTACAGCTAGCAGTGCAATAGTATTGTCAAAGCATCTGAAAGCAGG
hsa-mir-301b	chr22	+	22007269	22007346	hsa-mir-301b	hsa-mir-301b_-1_3	mature	0.21		22007313	22007334	CAGTGCAATGATATTGTCAAAG	409	GCCGCAGGTGCTCTGACGAGGTTGCACTACTGTGCTCTGAGAAGCAGTGCAATGATATTGTCAAAGCATCTGGGACCA
hsa-mir-301b	chr22	+	22007269	22007346	hsa-mir-301b	hsa-mir-301b	mature	0.68	Y	22007313	22007335	CAGTGCAATGATATTGTCAAAGC	1324	GCCGCAGGTGCTCTGACGAGGTTGCACTACTGTGCTCTGAGAAGCAGTGCAATGATATTGTCAAAGCATCTGGGACCA
hsa-mir-3065	chr17	+	79099676	79099754	hsa-mir-3065-5p	hsa-mir-3065-5p_-1_3	mature	0.43		79099685	79099706	TCAACAAAATCACTGATGCTGG	750	CTGCCCTCTTCAACAAAATCACTGATGCTGGAGTCGCCTGAGTCATCACTCAGCACCAGGATATTGTTGGAGAGGACAG
hsa-mir-3065	chr17	+	79099676	79099754	hsa-mir-3065-5p	hsa-mir-3065-5p	mature	0.17	Y	79099685	79099707	TCAACAAAATCACTGATGCTGGA	300	CTGCCCTCTTCAACAAAATCACTGATGCTGGAGTCGCCTGAGTCATCACTCAGCACCAGGATATTGTTGGAGAGGACAG
hsa-mir-3065	chr17	+	79099676	79099754	hsa-mir-3065-5p	hsa-mir-3065-5p_+2_3	mature	0.13		79099685	79099709	TCAACAAAATCACTGATGCTGGAGT	223	CTGCCCTCTTCAACAAAATCACTGATGCTGGAGTCGCCTGAGTCATCACTCAGCACCAGGATATTGTTGGAGAGGACAG
hsa-mir-3065	chr17	+	79099676	79099754	hsa-mir-3065-3p	hsa-mir-3065-3p	mature	0.03	Y	79099725	79099747	TCAGCACCAGGATATTGTTGGAG	55	CTGCCCTCTTCAACAAAATCACTGATGCTGGAGTCGCCTGAGTCATCACTCAGCACCAGGATATTGTTGGAGAGGACAG
hsa-mir-3074	chr9	-	97848295	97848375	hsa-mir-3074	hsa-mir-3074	mature	0.22	Y	97848305	97848326	GATATCAGCTCAGTAGGCACCG	4	GCTCGACTCCTGTTCCTGCTGAACTGAGCCAGTGTGTAAAATGAGAACTGATATCAGCTCAGTAGGCACCGGAGGGCGGGT
hsa-mir-3074	chr9	-	97848295	97848375	hsa-mir-3074	hsa-mir-3074_+1_5	mature	0.27		97848305	97848327	TGATATCAGCTCAGTAGGCACCG	5	GCTCGACTCCTGTTCCTGCTGAACTGAGCCAGTGTGTAAAATGAGAACTGATATCAGCTCAGTAGGCACCGGAGGGCGGGT
hsa-mir-3074	chr9	-	97848295	97848375	hsa-mir-3074-star	hsa-mir-3074-star_-1_3_+1_5	star	0.22		97848345	97848365	TGTTCCTGCTGAACTGAGCCA	4	GCTCGACTCCTGTTCCTGCTGAACTGAGCCAGTGTGTAAAATGAGAACTGATATCAGCTCAGTAGGCACCGGAGGGCGGGT
hsa-mir-30a	chr6	-	72113253	72113323	hsa-mir-30a*	hsa-mir-30a*	mature	0.05	Y	72113256	72113277	CTTTCAGTCGGATGTTTGCAGC	1575	GCGACTGTAAACATCCTCGACTGGAAGCTGTGAAGCCACAGATGGGCTTTCAGTCGGATGTTTGCAGCTGC
hsa-mir-30a	chr6	-	72113253	72113323	hsa-mir-30a	hsa-mir-30a_+2_3	mature	0.23		72113295	72113318	TGTAAACATCCTCGACTGGAAGCT	7020	GCGACTGTAAACATCCTCGACTGGAAGCTGTGAAGCCACAGATGGGCTTTCAGTCGGATGTTTGCAGCTGC
hsa-mir-30a	chr6	-	72113253	72113323	hsa-mir-30a	hsa-mir-30a_+1_3	mature	0.25		72113296	72113318	TGTAAACATCCTCGACTGGAAGC	7731	GCGACTGTAAACATCCTCGACTGGAAGCTGTGAAGCCACAGATGGGCTTTCAGTCGGATGTTTGCAGCTGC
hsa-mir-30a	chr6	-	72113253	72113323	hsa-mir-30a	hsa-mir-30a	mature	0.14	Y	72113297	72113318	TGTAAACATCCTCGACTGGAAG	4455	GCGACTGTAAACATCCTCGACTGGAAGCTGTGAAGCCACAGATGGGCTTTCAGTCGGATGTTTGCAGCTGC
hsa-mir-30a	chr6	-	72113253	72113323	hsa-mir-30a	hsa-mir-30a_-1_3	mature	0.12		72113298	72113318	TGTAAACATCCTCGACTGGAA	3745	GCGACTGTAAACATCCTCGACTGGAAGCTGTGAAGCCACAGATGGGCTTTCAGTCGGATGTTTGCAGCTGC
hsa-mir-30b	chr8	-	135812762	135812849	hsa-mir-30b*	hsa-mir-30b*	mature	0	Y	135812774	135812795	CTGGGAGGTGGATGTTTACTTC	120	ACCAAGTTTCAGTTCATGTAAACATCCTACACTCAGCTGTAATACATGGATTGGCTGGGAGGTGGATGTTTACTTCAGCTGACTTGGA
hsa-mir-30b	chr8	-	135812762	135812849	hsa-mir-30b	hsa-mir-30b	mature	0.75	Y	135812812	135812833	TGTAAACATCCTACACTCAGCT	38658	ACCAAGTTTCAGTTCATGTAAACATCCTACACTCAGCTGTAATACATGGATTGGCTGGGAGGTGGATGTTTACTTCAGCTGACTTGGA
hsa-mir-30b	chr8	-	135812762	135812849	hsa-mir-30b	hsa-mir-30b_-1_3	mature	0.1		135812813	135812833	TGTAAACATCCTACACTCAGC	5598	ACCAAGTTTCAGTTCATGTAAACATCCTACACTCAGCTGTAATACATGGATTGGCTGGGAGGTGGATGTTTACTTCAGCTGACTTGGA
hsa-mir-30c-1	chr1	+	41222955	41223043	hsa-mir-30c-1	hsa-mir-30c-1	mature	0.37	Y	41222971	41222993	TGTAAACATCCTACACTCTCAGC	105997	ACCATGCTGTAGTGTGTGTAAACATCCTACACTCTCAGCTGTGAGCTCAAGGTGGCTGGGAGAGGGTTGTTTACTCCTTCTGCCATGGA
hsa-mir-30c-1	chr1	+	41222955	41223043	hsa-mir-30c-1	hsa-mir-30c-1_+1_3	mature	0.4		41222971	41222994	TGTAAACATCCTACACTCTCAGCT	115068	ACCATGCTGTAGTGTGTGTAAACATCCTACACTCTCAGCTGTGAGCTCAAGGTGGCTGGGAGAGGGTTGTTTACTCCTTCTGCCATGGA
hsa-mir-30c-2	chr6	-	72086662	72086733	hsa-mir-30c-2	hsa-mir-30c-2_+1_3	mature	0.4		72086704	72086727	TGTAAACATCCTACACTCTCAGCT	115068	AGATACTGTAAACATCCTACACTCTCAGCTGTGGAAAGTAAGAAAGCTGGGAGAAGGCTGTTTACTCTTTCT
hsa-mir-30c-2	chr6	-	72086662	72086733	hsa-mir-30c-2	hsa-mir-30c-2	mature	0.37	Y	72086705	72086727	TGTAAACATCCTACACTCTCAGC	105997	AGATACTGTAAACATCCTACACTCTCAGCTGTGGAAAGTAAGAAAGCTGGGAGAAGGCTGTTTACTCTTTCT
hsa-mir-30d	chr8	-	135817118	135817187	hsa-mir-30d*	hsa-mir-30d*	mature	0	Y	135817121	135817142	CTTTCAGTCAGATGTTTGCTGC	72	GTTGTTGTAAACATCCCCGACTGGAAGCTGTAAGACACAGCTAAGCTTTCAGTCAGATGTTTGCTGCTAC
hsa-mir-30d	chr8	-	135817118	135817187	hsa-mir-30d	hsa-mir-30d_+2_3	mature	0.25		135817159	135817182	TGTAAACATCCCCGACTGGAAGCT	23822	GTTGTTGTAAACATCCCCGACTGGAAGCTGTAAGACACAGCTAAGCTTTCAGTCAGATGTTTGCTGCTAC
hsa-mir-30d	chr8	-	135817118	135817187	hsa-mir-30d	hsa-mir-30d_+1_3	mature	0.21		135817160	135817182	TGTAAACATCCCCGACTGGAAGC	19608	GTTGTTGTAAACATCCCCGACTGGAAGCTGTAAGACACAGCTAAGCTTTCAGTCAGATGTTTGCTGCTAC
hsa-mir-30d	chr8	-	135817118	135817187	hsa-mir-30d	hsa-mir-30d	mature	0.21	Y	135817161	135817182	TGTAAACATCCCCGACTGGAAG	19950	GTTGTTGTAAACATCCCCGACTGGAAGCTGTAAGACACAGCTAAGCTTTCAGTCAGATGTTTGCTGCTAC
hsa-mir-30d	chr8	-	135817118	135817187	hsa-mir-30d	hsa-mir-30d_-1_3	mature	0.11		135817162	135817182	TGTAAACATCCCCGACTGGAA	10512	GTTGTTGTAAACATCCCCGACTGGAAGCTGTAAGACACAGCTAAGCTTTCAGTCAGATGTTTGCTGCTAC
hsa-mir-30d	chr8	-	135817118	135817187	hsa-mir-30d	hsa-mir-30d_-2_3	mature	0.11		135817163	135817182	TGTAAACATCCCCGACTGGA	10443	GTTGTTGTAAACATCCCCGACTGGAAGCTGTAAGACACAGCTAAGCTTTCAGTCAGATGTTTGCTGCTAC
hsa-mir-30e	chr1	+	41220026	41220117	hsa-mir-30e	hsa-mir-30e	mature	0.11	Y	41220042	41220063	TGTAAACATCCTTGACTGGAAG	9795	GGGCAGTCTTTGCTACTGTAAACATCCTTGACTGGAAGCTGTAAGGTGTTCAGAGGAGCTTTCAGTCGGATGTTTACAGCGGCAGGCTGCCA
hsa-mir-30e	chr1	+	41220026	41220117	hsa-mir-30e	hsa-mir-30e_+1_3	mature	0.2		41220042	41220064	TGTAAACATCCTTGACTGGAAGC	18040	GGGCAGTCTTTGCTACTGTAAACATCCTTGACTGGAAGCTGTAAGGTGTTCAGAGGAGCTTTCAGTCGGATGTTTACAGCGGCAGGCTGCCA
hsa-mir-30e	chr1	+	41220026	41220117	hsa-mir-30e	hsa-mir-30e_+2_3	mature	0.27		41220042	41220065	TGTAAACATCCTTGACTGGAAGCT	23506	GGGCAGTCTTTGCTACTGTAAACATCCTTGACTGGAAGCTGTAAGGTGTTCAGAGGAGCTTTCAGTCGGATGTTTACAGCGGCAGGCTGCCA
hsa-mir-30e	chr1	+	41220026	41220117	hsa-mir-30e*	hsa-mir-30e*	mature	0.14	Y	41220084	41220105	CTTTCAGTCGGATGTTTACAGC	12905	GGGCAGTCTTTGCTACTGTAAACATCCTTGACTGGAAGCTGTAAGGTGTTCAGAGGAGCTTTCAGTCGGATGTTTACAGCGGCAGGCTGCCA
hsa-mir-3115	chr1	+	23370797	23370864	hsa-mir-3115	hsa-mir-3115	mature	1	Y	23370802	23370821	ATATGGGTTTACTAGTTGGT	10	TCTGAATATGGGTTTACTAGTTGGTGGTGAATTCATGAGTCGCCAACTATTAGGCCTTTATGTCCAGA
hsa-mir-3116-1	chr1	+	62544457	62544530	hsa-mir-3116-1-star	hsa-mir-3116-1-star_-1_3	star	0.1		62544467	62544487	TCCCTACTATGTTCCAGGCAC	5	CTTTATTGAGTCCCTACTATGTTCCAGGCACTGGGTATCGTAGGTGCCTGGAACATAGTAGGGACTCAATAAAG
hsa-mir-3116-1	chr1	+	62544457	62544530	hsa-mir-3116-1-star	hsa-mir-3116-1-star	star	0.59		62544467	62544488	TCCCTACTATGTTCCAGGCACT	29	CTTTATTGAGTCCCTACTATGTTCCAGGCACTGGGTATCGTAGGTGCCTGGAACATAGTAGGGACTCAATAAAG
hsa-mir-3116-1	chr1	+	62544457	62544530	hsa-mir-3116-1	hsa-mir-3116-1	mature	0.14	Y	62544501	62544522	TGCCTGGAACATAGTAGGGACT	7	CTTTATTGAGTCCCTACTATGTTCCAGGCACTGGGTATCGTAGGTGCCTGGAACATAGTAGGGACTCAATAAAG
hsa-mir-3116-2	chr1	-	62544460	62544527	hsa-mir-3116-2	hsa-mir-3116-2	mature	0.33	Y	62544465	62544486	TGCCTGGAACATAGTAGGGACT	7	TATTGAGTCCCTACTATGTTCCAGGCACCTACGATACCCAGTGCCTGGAACATAGTAGGGACTCAATA
hsa-mir-3116-2	chr1	-	62544460	62544527	hsa-mir-3116-2	hsa-mir-3116-2_-1_3	mature	0.14		62544466	62544486	TGCCTGGAACATAGTAGGGAC	3	TATTGAGTCCCTACTATGTTCCAGGCACCTACGATACCCAGTGCCTGGAACATAGTAGGGACTCAATA
hsa-mir-3116-2	chr1	-	62544460	62544527	hsa-mir-3116-2-star	hsa-mir-3116-2-star	star	0.14		62544499	62544520	TCCCTACTATGTTCCAGGCACC	3	TATTGAGTCCCTACTATGTTCCAGGCACCTACGATACCCAGTGCCTGGAACATAGTAGGGACTCAATA
hsa-mir-3116-2	chr1	-	62544460	62544527	hsa-mir-3116-2-star	hsa-mir-3116-2-star_-1_3	star	0.23		62544500	62544520	TCCCTACTATGTTCCAGGCAC	5	TATTGAGTCCCTACTATGTTCCAGGCACCTACGATACCCAGTGCCTGGAACATAGTAGGGACTCAATA
hsa-mir-3121	chr1	-	180407448	180407524	hsa-mir-3121	hsa-mir-3121	mature	0.48	Y	180407457	180407478	TAAATAGAGTAGGCAAAGGACA	15	AAATGGTTATGTCCTTTGCCTATTCTATTTAAGACACCCTGTACCTTAAATAGAGTAGGCAAAGGACAGAAACATTT
hsa-mir-3121	chr1	-	180407448	180407524	hsa-mir-3121	hsa-mir-3121_-1_3	mature	0.19		180407458	180407478	TAAATAGAGTAGGCAAAGGAC	6	AAATGGTTATGTCCTTTGCCTATTCTATTTAAGACACCCTGTACCTTAAATAGAGTAGGCAAAGGACAGAAACATTT
hsa-mir-3121	chr1	-	180407448	180407524	hsa-mir-3121-star	hsa-mir-3121-star	star	0.19		180407492	180407513	TCCTTTGCCTATTCTATTTAAG	6	AAATGGTTATGTCCTTTGCCTATTCTATTTAAGACACCCTGTACCTTAAATAGAGTAGGCAAAGGACAGAAACATTT
hsa-mir-3124	chr1	+	249120575	249120641	hsa-mir-3124	hsa-mir-3124_-1_3	mature	0.33		249120581	249120600	TTCGCGGGCGAAGGCAAAGT	2	GCGGGCTTCGCGGGCGAAGGCAAAGTCGATTTCCAAAAGTGACTTTCCTCACTCCCGTGAAGTCGGC
hsa-mir-3124	chr1	+	249120575	249120641	hsa-mir-3124-star	hsa-mir-3124-star_+1_5	star	0.16		249120616	249120637	ACTTTCCTCACTCCCGTGAAGT	1	GCGGGCTTCGCGGGCGAAGGCAAAGTCGATTTCCAAAAGTGACTTTCCTCACTCCCGTGAAGTCGGC
hsa-mir-3124	chr1	+	249120575	249120641	hsa-mir-3124-star	hsa-mir-3124-star	star	0.16		249120617	249120637	CTTTCCTCACTCCCGTGAAGT	1	GCGGGCTTCGCGGGCGAAGGCAAAGTCGATTTCCAAAAGTGACTTTCCTCACTCCCGTGAAGTCGGC
hsa-mir-3124	chr1	+	249120575	249120641	hsa-mir-3124-star	hsa-mir-3124-star_-1_5	star	0.16		249120618	249120637	TTTCCTCACTCCCGTGAAGT	1	GCGGGCTTCGCGGGCGAAGGCAAAGTCGATTTCCAAAAGTGACTTTCCTCACTCCCGTGAAGTCGGC
hsa-mir-3126	chr2	+	69330813	69330886	hsa-mir-3126-5p	hsa-mir-3126-5p_-1_3	mature	0.2		69330822	69330842	TGAGGGACAGATGCCAGAAGC	1	ATGATTATATGAGGGACAGATGCCAGAAGCACTGGTTATGATTTGCATCTGGCATCCGTCACACAGATAATTAT
hsa-mir-3126	chr2	+	69330813	69330886	hsa-mir-3126-5p	hsa-mir-3126-5p	mature	0.4	Y	69330822	69330843	TGAGGGACAGATGCCAGAAGCA	2	ATGATTATATGAGGGACAGATGCCAGAAGCACTGGTTATGATTTGCATCTGGCATCCGTCACACAGATAATTAT
hsa-mir-3126	chr2	+	69330813	69330886	hsa-mir-3126-3p	hsa-mir-3126-3p	mature	0.4	Y	69330858	69330879	CATCTGGCATCCGTCACACAGA	2	ATGATTATATGAGGGACAGATGCCAGAAGCACTGGTTATGATTTGCATCTGGCATCCGTCACACAGATAATTAT
hsa-mir-3127	chr2	+	97464014	97464089	hsa-mir-3127	hsa-mir-3127_-1_3	mature	0.25		97464024	97464045	ATCAGGGCTTGTGGAATGGGAA	5	GGCCAGGCCCATCAGGGCTTGTGGAATGGGAAGGAGAAGGGACGCTTCCCCTTCTGCAGGCCTGCTGGGTGTGGCT
hsa-mir-3127	chr2	+	97464014	97464089	hsa-mir-3127	hsa-mir-3127	mature	0.4	Y	97464024	97464046	ATCAGGGCTTGTGGAATGGGAAG	8	GGCCAGGCCCATCAGGGCTTGTGGAATGGGAAGGAGAAGGGACGCTTCCCCTTCTGCAGGCCTGCTGGGTGTGGCT
hsa-mir-3127	chr2	+	97464014	97464089	hsa-mir-3127-star	hsa-mir-3127-star	star	0.3		97464060	97464081	TCCCCTTCTGCAGGCCTGCTGG	6	GGCCAGGCCCATCAGGGCTTGTGGAATGGGAAGGAGAAGGGACGCTTCCCCTTCTGCAGGCCTGCTGGGTGTGGCT
hsa-mir-3128	chr2	-	178120672	178120737	hsa-mir-3128	hsa-mir-3128_+1_3_-2_5	mature	0.71		178120710	178120731	TGGCAAGTAAAAAACTCTCATT	28	TTCCTCTGGCAAGTAAAAAACTCTCATTTTCCTTAAAAAATGAGAGTTTTTTACTTGCAATAGGAA
hsa-mir-3128	chr2	-	178120672	178120737	hsa-mir-3128	hsa-mir-3128	mature	0.02	Y	178120711	178120733	TCTGGCAAGTAAAAAACTCTCAT	1	TTCCTCTGGCAAGTAAAAAACTCTCATTTTCCTTAAAAAATGAGAGTTTTTTACTTGCAATAGGAA
hsa-mir-3129	chr2	-	189997761	189997836	hsa-mir-3129-star	hsa-mir-3129-star_-1_5	star	0.13		189997767	189997787	CTAATCTCTACACTGCTGCCC	3	GTACTTGGGCAGTAGTGTAGAGATTGGTTTGCCTGTTAATGAATTCAAACTAATCTCTACACTGCTGCCCAAGAGC
hsa-mir-3129	chr2	-	189997761	189997836	hsa-mir-3129	hsa-mir-3129_other1	other	0.34		189997769	189997790	AAACTAATCTCTACACTGCTGC	8	GTACTTGGGCAGTAGTGTAGAGATTGGTTTGCCTGTTAATGAATTCAAACTAATCTCTACACTGCTGCCCAAGAGC
hsa-mir-3130-1	chr2	-	207647957	207648031	hsa-mir-3130-1-3p	hsa-mir-3130-1-3p_+1_3	mature	0.21		207647967	207647988	GCTGCACCGGAGACTGGGTAAG	3	CTTGTCATGTCTTACCCAGTCTCCGGTGCAGCCTGTTGTCAAGGCTGCACCGGAGACTGGGTAAGACATGACAAG
hsa-mir-3130-1	chr2	-	207647957	207648031	hsa-mir-3130-1-3p	hsa-mir-3130-1-3p	mature	0.35	Y	207647968	207647988	GCTGCACCGGAGACTGGGTAA	5	CTTGTCATGTCTTACCCAGTCTCCGGTGCAGCCTGTTGTCAAGGCTGCACCGGAGACTGGGTAAGACATGACAAG
hsa-mir-3130-2	chr2	+	207647957	207648031	hsa-mir-3130-2-3p	hsa-mir-3130-2-3p	mature	0.33	Y	207648000	207648020	GCTGCACCGGAGACTGGGTAA	5	CTTGTCATGTCTTACCCAGTCTCCGGTGCAGCCTTGACAACAGGCTGCACCGGAGACTGGGTAAGACATGACAAG
hsa-mir-3130-2	chr2	+	207647957	207648031	hsa-mir-3130-2-3p	hsa-mir-3130-2-3p_+1_3	mature	0.2		207648000	207648021	GCTGCACCGGAGACTGGGTAAG	3	CTTGTCATGTCTTACCCAGTCTCCGGTGCAGCCTTGACAACAGGCTGCACCGGAGACTGGGTAAGACATGACAAG
hsa-mir-3132	chr2	-	220413794	220413868	hsa-mir-3132-star	hsa-mir-3132-star_-1_5	star	0.2		220413799	220413820	CTTGAGCCCTCCCTCTCTCATC	1	GGTGGGATGGGTAGAGAAGGAGCTCAGAGGACGGTGCGCCTTGTTTCCCTTGAGCCCTCCCTCTCTCATCCCACC
hsa-mir-3132	chr2	-	220413794	220413868	hsa-mir-3132-star	hsa-mir-3132-star_-1_3_-1_5	star	0.8		220413800	220413820	CTTGAGCCCTCCCTCTCTCAT	4	GGTGGGATGGGTAGAGAAGGAGCTCAGAGGACGGTGCGCCTTGTTTCCCTTGAGCCCTCCCTCTCTCATCCCACC
hsa-mir-3133	chr2	+	242417319	242417396	hsa-mir-3133	hsa-mir-3133	mature	0.37	Y	242417328	242417349	TAAAGAACTCTTAAAACCCAAT	106	CAGAAATTGTAAAGAACTCTTAAAACCCAATAGTAAAAAGACAACCTGTTGAGTTTTAAGAGTTCTTTATATATTCTG
hsa-mir-3133	chr2	+	242417319	242417396	hsa-mir-3133	hsa-mir-3133_-1_5	mature	0.34		242417329	242417349	AAAGAACTCTTAAAACCCAAT	97	CAGAAATTGTAAAGAACTCTTAAAACCCAATAGTAAAAAGACAACCTGTTGAGTTTTAAGAGTTCTTTATATATTCTG
hsa-mir-3134	chr3	-	15738804	15738877	hsa-mir-3134	hsa-mir-3134_-2_5	mature	0.18		15738811	15738831	ATGGATAAAAGACTACATATT	2	TGTATCCAATGTGTAGTCTTTTATCCCTCACATGGAGTAAAATATGATGGATAAAAGACTACATATTGGGTACA
hsa-mir-3134	chr3	-	15738804	15738877	hsa-mir-3134	hsa-mir-3134	mature	0.81	Y	15738811	15738833	TGATGGATAAAAGACTACATATT	9	TGTATCCAATGTGTAGTCTTTTATCCCTCACATGGAGTAAAATATGATGGATAAAAGACTACATATTGGGTACA
hsa-mir-3136	chr3	-	69098108	69098185	hsa-mir-3136	hsa-mir-3136	mature	0.12	Y	69098154	69098176	CTGACTGAATAGGTAGGGTCATT	11	AATATGAAACTGACTGAATAGGTAGGGTCATTTTTCTGTGACTGCACATGGCCCAACCTATTCAGTTAGTTCCATATT
hsa-mir-3136	chr3	-	69098108	69098185	hsa-mir-3136	hsa-mir-3136_-1_3	mature	0.67		69098155	69098176	CTGACTGAATAGGTAGGGTCAT	59	AATATGAAACTGACTGAATAGGTAGGGTCATTTTTCTGTGACTGCACATGGCCCAACCTATTCAGTTAGTTCCATATT
hsa-mir-3136	chr3	-	69098108	69098185	hsa-mir-3136	hsa-mir-3136_-2_3	mature	0.12		69098156	69098176	CTGACTGAATAGGTAGGGTCA	11	AATATGAAACTGACTGAATAGGTAGGGTCATTTTTCTGTGACTGCACATGGCCCAACCTATTCAGTTAGTTCCATATT
hsa-mir-3138	chr4	-	10080234	10080315	hsa-mir-3138	hsa-mir-3138_other1	other	0.37		10080243	10080263	ACAGTGAGGTAGAGGGAGTGC	9	CCCTCCTCGGCACTTCCCCCACCTCACTGCCCGGGTGCCCACAAGACTGTGGACAGTGAGGTAGAGGGAGTGCCGAGGAGGG
hsa-mir-3138	chr4	-	10080234	10080315	hsa-mir-3138	hsa-mir-3138_other2	other	0.29		10080284	10080304	ACTTCCCCCACCTCACTGCCC	7	CCCTCCTCGGCACTTCCCCCACCTCACTGCCCGGGTGCCCACAAGACTGTGGACAGTGAGGTAGAGGGAGTGCCGAGGAGGG
hsa-mir-3140	chr4	-	153410478	153410567	hsa-mir-3140	hsa-mir-3140_-1_3	mature	0.85		153410488	153410508	AGCTTTTGGGAATTCAGGTAG	6	CCTCTTGAGGTACCTGAATTACCAAAAGCTTTATGTATTCTGAAGTTATTGAAAATAAGAGCTTTTGGGAATTCAGGTAGTTCAGGAGTG
hsa-mir-3143	chr6	+	27115404	27115466	hsa-mir-3143	hsa-mir-3143_-3_3	mature	0.7		27115407	27115428	ATAACATTGTAAAGCGCTTCTT	44	TAGATAACATTGTAAAGCGCTTCTTTCGCGGTTGGGCTGGAGCAACTCTTTACAATGTTTCTA
hsa-mir-3145	chr6	-	138756349	138756430	hsa-mir-3145	hsa-mir-3145_-2_3	mature	0.21		138756361	138756382	AGATATTTTGAGTGTTTGGAAT	17	TATATGAGTTCAACTCCAAACACTCAAAACTCATTGTTGAATGGAATGAGATATTTTGAGTGTTTGGAATTGAACTCGTATA
hsa-mir-3145	chr6	-	138756349	138756430	hsa-mir-3145-star	hsa-mir-3145-star_+1_5	star	0.35		138756398	138756419	AACTCCAAACACTCAAAACTCA	28	TATATGAGTTCAACTCCAAACACTCAAAACTCATTGTTGAATGGAATGAGATATTTTGAGTGTTTGGAATTGAACTCGTATA
hsa-mir-3145	chr6	-	138756349	138756430	hsa-mir-3145-star	hsa-mir-3145-star_-1_3_+1_5	star	0.24		138756399	138756419	AACTCCAAACACTCAAAACTC	19	TATATGAGTTCAACTCCAAACACTCAAAACTCATTGTTGAATGGAATGAGATATTTTGAGTGTTTGGAATTGAACTCGTATA
hsa-mir-3146	chr7	-	19744980	19745058	hsa-mir-3146	hsa-mir-3146_+1_3	mature	0.22		19744987	19745009	CATGCTAGGATAGAAAGAATGGG	7	GCTAAGTCCCTTCTTTCTATCCTAGTATAACTTGAAGAATTCAAATAGTCATGCTAGGATAGAAAGAATGGGACTTGGC
hsa-mir-3146	chr7	-	19744980	19745058	hsa-mir-3146	hsa-mir-3146	mature	0.16	Y	19744988	19745009	CATGCTAGGATAGAAAGAATGG	5	GCTAAGTCCCTTCTTTCTATCCTAGTATAACTTGAAGAATTCAAATAGTCATGCTAGGATAGAAAGAATGGGACTTGGC
hsa-mir-3146	chr7	-	19744980	19745058	hsa-mir-3146	hsa-mir-3146_-1_3_+1_5	mature	0.12		19744989	19745010	TCATGCTAGGATAGAAAGAATG	4	GCTAAGTCCCTTCTTTCTATCCTAGTATAACTTGAAGAATTCAAATAGTCATGCTAGGATAGAAAGAATGGGACTTGGC
hsa-mir-3146	chr7	-	19744980	19745058	hsa-mir-3146-star	hsa-mir-3146-star_+1_5	star	0.25		19745028	19745049	CTTCTTTCTATCCTAGTATAAC	8	GCTAAGTCCCTTCTTTCTATCCTAGTATAACTTGAAGAATTCAAATAGTCATGCTAGGATAGAAAGAATGGGACTTGGC
hsa-mir-3150	chr8	+	96085141	96085220	hsa-mir-3150-star	hsa-mir-3150-star_-2_3_+1_5	star	0.2		96085152	96085172	CAACCTCGACGATCTCCTCAG	4	GGGAAGCAGGCCAACCTCGACGATCTCCTCAGCACCTGAACGCCAAGGCTGGGGAGATCCTCGAGGTTGGCCTGCTTTCC
hsa-mir-3150	chr8	+	96085141	96085220	hsa-mir-3150-star	hsa-mir-3150-star_-1_3_+1_5	star	0.3		96085152	96085173	CAACCTCGACGATCTCCTCAGC	6	GGGAAGCAGGCCAACCTCGACGATCTCCTCAGCACCTGAACGCCAAGGCTGGGGAGATCCTCGAGGTTGGCCTGCTTTCC
hsa-mir-3150	chr8	+	96085141	96085220	hsa-mir-3150-star	hsa-mir-3150-star_-1_3	star	0.25		96085153	96085173	AACCTCGACGATCTCCTCAGC	5	GGGAAGCAGGCCAACCTCGACGATCTCCTCAGCACCTGAACGCCAAGGCTGGGGAGATCCTCGAGGTTGGCCTGCTTTCC
hsa-mir-3150	chr8	+	96085141	96085220	hsa-mir-3150	hsa-mir-3150_+1_3_-1_5	mature	0.1		96085190	96085211	TGGGGAGATCCTCGAGGTTGGC	2	GGGAAGCAGGCCAACCTCGACGATCTCCTCAGCACCTGAACGCCAAGGCTGGGGAGATCCTCGAGGTTGGCCTGCTTTCC
hsa-mir-3155	chr10	+	6194158	6194239	hsa-mir-3155-star	hsa-mir-3155-star_-1_3_+1_5	star	0.16		6194169	6194189	CCTCCCACTGCAGAGCCTGGG	5	TCCGGGCATCACCTCCCACTGCAGAGCCTGGGGAGCCGGACAGCTCCCTTCCCAGGCTCTGCAGTGGGAACTGATGCCTGGA
hsa-mir-3155	chr10	+	6194158	6194239	hsa-mir-3155-star	hsa-mir-3155-star_+1_5	star	0.22		6194169	6194190	CCTCCCACTGCAGAGCCTGGGG	7	TCCGGGCATCACCTCCCACTGCAGAGCCTGGGGAGCCGGACAGCTCCCTTCCCAGGCTCTGCAGTGGGAACTGATGCCTGGA
hsa-mir-3155	chr10	+	6194158	6194239	hsa-mir-3155-star	hsa-mir-3155-star_+1_3_+1_5	star	0.25		6194169	6194191	CCTCCCACTGCAGAGCCTGGGGA	8	TCCGGGCATCACCTCCCACTGCAGAGCCTGGGGAGCCGGACAGCTCCCTTCCCAGGCTCTGCAGTGGGAACTGATGCCTGGA
hsa-mir-3155	chr10	+	6194158	6194239	hsa-mir-3155	hsa-mir-3155	mature	0.03	Y	6194209	6194229	CCAGGCTCTGCAGTGGGAACT	1	TCCGGGCATCACCTCCCACTGCAGAGCCTGGGGAGCCGGACAGCTCCCTTCCCAGGCTCTGCAGTGGGAACTGATGCCTGGA
hsa-mir-3157	chr10	-	97824071	97824155	hsa-mir-3157	hsa-mir-3157	mature	0.51	Y	97824125	97824146	TTCAGCCAGGCTAGTGCAGTCT	28	GGGAAGGGCTTCAGCCAGGCTAGTGCAGTCTGCTTTGTGCCAACACTGGGGTGATGACTGCCCTAGTCTAGCTGAAGCTTTTCCC
hsa-mir-3158-1	chr10	+	103361173	103361253	hsa-mir-3158-1	hsa-mir-3158-1_-1_3	mature	0.16		103361222	103361242	AAGGGCTTCCTCTCTGCAGGA	32	ATTCAGGCCGGTCCTGCAGAGAGGAAGCCCTTCTGCTTACAGGTATTGGAAGGGCTTCCTCTCTGCAGGACCGGCCTGAAT
hsa-mir-3158-1	chr10	+	103361173	103361253	hsa-mir-3158-1	hsa-mir-3158-1	mature	0.47	Y	103361222	103361243	AAGGGCTTCCTCTCTGCAGGAC	93	ATTCAGGCCGGTCCTGCAGAGAGGAAGCCCTTCTGCTTACAGGTATTGGAAGGGCTTCCTCTCTGCAGGACCGGCCTGAAT
hsa-mir-3158-2	chr10	-	103361173	103361253	hsa-mir-3158-2	hsa-mir-3158-2	mature	0.48	Y	103361183	103361204	AAGGGCTTCCTCTCTGCAGGAC	93	ATTCAGGCCGGTCCTGCAGAGAGGAAGCCCTTCCAATACCTGTAAGCAGAAGGGCTTCCTCTCTGCAGGACCGGCCTGAAT
hsa-mir-3158-2	chr10	-	103361173	103361253	hsa-mir-3158-2	hsa-mir-3158-2_-1_3	mature	0.16		103361184	103361204	AAGGGCTTCCTCTCTGCAGGA	32	ATTCAGGCCGGTCCTGCAGAGAGGAAGCCCTTCCAATACCTGTAAGCAGAAGGGCTTCCTCTCTGCAGGACCGGCCTGAAT
hsa-mir-3159	chr11	+	18409333	18409406	hsa-mir-3159	hsa-mir-3159_-1_3	mature	0.5		18409342	18409362	TAGGATTACAAGTGTCGGCCA	3	CCAAAGTCCTAGGATTACAAGTGTCGGCCACGGGCTGGGCACAGTGGCTCACGCCTGTAATCCCAGCATTTTGG
hsa-mir-3159	chr11	+	18409333	18409406	hsa-mir-3159	hsa-mir-3159_+1_3	mature	0.5		18409342	18409364	TAGGATTACAAGTGTCGGCCACG	3	CCAAAGTCCTAGGATTACAAGTGTCGGCCACGGGCTGGGCACAGTGGCTCACGCCTGTAATCCCAGCATTTTGG
hsa-mir-3160-1	chr11	-	46473354	46473438	hsa-mir-3160-1	hsa-mir-3160-1	mature	0.2	Y	46473364	46473385	AGAGCTGAGACTAGAAAGCCCA	3	GGACCTGCCCTGGGCTTTCTAGTCTCAGCTCTCCTCCAGCTCAGCTGGTCAGGAGAGCTGAGACTAGAAAGCCCAGGGCAGGTTC
hsa-mir-3160-1	chr11	-	46473354	46473438	hsa-mir-3160-1	hsa-mir-3160-1_-1_3	mature	0.33		46473365	46473385	AGAGCTGAGACTAGAAAGCCC	5	GGACCTGCCCTGGGCTTTCTAGTCTCAGCTCTCCTCCAGCTCAGCTGGTCAGGAGAGCTGAGACTAGAAAGCCCAGGGCAGGTTC
hsa-mir-3160-1	chr11	-	46473354	46473438	hsa-mir-3160-1-star	hsa-mir-3160-1-star	star	0.26		46473405	46473426	GGCTTTCTAGTCTCAGCTCTCC	4	GGACCTGCCCTGGGCTTTCTAGTCTCAGCTCTCCTCCAGCTCAGCTGGTCAGGAGAGCTGAGACTAGAAAGCCCAGGGCAGGTTC
hsa-mir-3160-1	chr11	-	46473354	46473438	hsa-mir-3160-1-star	hsa-mir-3160-1-star_-1_3	star	0.2		46473406	46473426	GGCTTTCTAGTCTCAGCTCTC	3	GGACCTGCCCTGGGCTTTCTAGTCTCAGCTCTCCTCCAGCTCAGCTGGTCAGGAGAGCTGAGACTAGAAAGCCCAGGGCAGGTTC
hsa-mir-3160-2	chr11	+	46473356	46473436	hsa-mir-3160-2-star	hsa-mir-3160-2-star_-1_3	star	0.2		46473366	46473386	GGCTTTCTAGTCTCAGCTCTC	3	ACCTGCCCTGGGCTTTCTAGTCTCAGCTCTCCTGACCAGCTGAGCTGGAGGAGAGCTGAGACTAGAAAGCCCAGGGCAGGT
hsa-mir-3160-2	chr11	+	46473356	46473436	hsa-mir-3160-2-star	hsa-mir-3160-2-star	star	0.26		46473366	46473387	GGCTTTCTAGTCTCAGCTCTCC	4	ACCTGCCCTGGGCTTTCTAGTCTCAGCTCTCCTGACCAGCTGAGCTGGAGGAGAGCTGAGACTAGAAAGCCCAGGGCAGGT
hsa-mir-3160-2	chr11	+	46473356	46473436	hsa-mir-3160-2	hsa-mir-3160-2_-1_3	mature	0.33		46473407	46473427	AGAGCTGAGACTAGAAAGCCC	5	ACCTGCCCTGGGCTTTCTAGTCTCAGCTCTCCTGACCAGCTGAGCTGGAGGAGAGCTGAGACTAGAAAGCCCAGGGCAGGT
hsa-mir-3160-2	chr11	+	46473356	46473436	hsa-mir-3160-2	hsa-mir-3160-2	mature	0.2	Y	46473407	46473428	AGAGCTGAGACTAGAAAGCCCA	3	ACCTGCCCTGGGCTTTCTAGTCTCAGCTCTCCTGACCAGCTGAGCTGGAGGAGAGCTGAGACTAGAAAGCCCAGGGCAGGT
hsa-mir-3161	chr11	+	48118333	48118409	hsa-mir-3161	hsa-mir-3161_-1_3	mature	0.8		48118342	48118363	CTGATAAGAACAGAGGCCCAGA	25	CCTCGAGAGCTGATAAGAACAGAGGCCCAGATTGAAGTTGAATAGTGCTGGGCCTTTGTTTTTACCAAGTTCCCTGG
hsa-mir-3161	chr11	+	48118333	48118409	hsa-mir-3161	hsa-mir-3161	mature	0.09	Y	48118342	48118364	CTGATAAGAACAGAGGCCCAGAT	3	CCTCGAGAGCTGATAAGAACAGAGGCCCAGATTGAAGTTGAATAGTGCTGGGCCTTTGTTTTTACCAAGTTCCCTGG
hsa-mir-3164	chr11	+	68850643	68850725	hsa-mir-3164	hsa-mir-3164_-2_3	mature	0.2		68850652	68850671	TGTGACTTTAAGGGAAATGG	1	CTTGGAAACTGTGACTTTAAGGGAAATGGCGCACAGCAGACCCTGCAATCATGCCGTTTTGCTTGAAGTCGCAGTTTCCCAGG
hsa-mir-3164	chr11	+	68850643	68850725	hsa-mir-3164	hsa-mir-3164_-1_3	mature	0.4		68850652	68850672	TGTGACTTTAAGGGAAATGGC	2	CTTGGAAACTGTGACTTTAAGGGAAATGGCGCACAGCAGACCCTGCAATCATGCCGTTTTGCTTGAAGTCGCAGTTTCCCAGG
hsa-mir-3164	chr11	+	68850643	68850725	hsa-mir-3164	hsa-mir-3164	mature	0.4	Y	68850652	68850673	TGTGACTTTAAGGGAAATGGCG	2	CTTGGAAACTGTGACTTTAAGGGAAATGGCGCACAGCAGACCCTGCAATCATGCCGTTTTGCTTGAAGTCGCAGTTTCCCAGG
hsa-mir-3165	chr11	-	71783273	71783347	hsa-mir-3165-star	hsa-mir-3165-star	star	0.3		71783280	71783301	AGGTCACATTGTATCCACCTTA	8	CCGGTGGCAAGGTGGATGCAATGTGACCTCAACTCTTGGTCCTCTGAGGTCACATTGTATCCACCTTACCACTGG
hsa-mir-3165	chr11	-	71783273	71783347	hsa-mir-3165-star	hsa-mir-3165-star_-1_3	star	0.15		71783281	71783301	AGGTCACATTGTATCCACCTT	4	CCGGTGGCAAGGTGGATGCAATGTGACCTCAACTCTTGGTCCTCTGAGGTCACATTGTATCCACCTTACCACTGG
hsa-mir-3165	chr11	-	71783273	71783347	hsa-mir-3165	hsa-mir-3165	mature	0.19	Y	71783317	71783338	AGGTGGATGCAATGTGACCTCA	5	CCGGTGGCAAGGTGGATGCAATGTGACCTCAACTCTTGGTCCTCTGAGGTCACATTGTATCCACCTTACCACTGG
hsa-mir-3170	chr13	+	98860777	98860853	hsa-mir-3170	hsa-mir-3170	mature	0.06	Y	98860786	98860807	CTGGGGTTCTGAGACAGACAGT	2	CTGGTAACACTGGGGTTCTGAGACAGACAGTGTTAGCTCCAGAAGCATTGCCTGTCTTAGAACCCCTATGTTACCAG
hsa-mir-3170	chr13	+	98860777	98860853	hsa-mir-3170-star	hsa-mir-3170-star_-1_3	star	0.19		98860825	98860845	TGCCTGTCTTAGAACCCCTAT	6	CTGGTAACACTGGGGTTCTGAGACAGACAGTGTTAGCTCCAGAAGCATTGCCTGTCTTAGAACCCCTATGTTACCAG
hsa-mir-3170	chr13	+	98860777	98860853	hsa-mir-3170	hsa-mir-3170_other1	other	0.16		98860837	98860858	AACCCCTATGTTACCAGACGAC	5	CTGGTAACACTGGGGTTCTGAGACAGACAGTGTTAGCTCCAGAAGCATTGCCTGTCTTAGAACCCCTATGTTACCAG
hsa-mir-3173	chr14	-	95604255	95604322	hsa-mir-3173	hsa-mir-3173	mature	0.01	Y	95604259	95604280	AAAGGAGGAAATAGGCAGGCCA	6	TCCCTGCCCTGCCTGTTTTCTCCTTTGTGATTTTATGAGAACAAAGGAGGAAATAGGCAGGCCAGGGA
hsa-mir-3173	chr14	-	95604255	95604322	hsa-mir-3173-star	hsa-mir-3173-star	star	0.21		95604295	95604316	CCCTGCCTGTTTTCTCCTTTGT	104	TCCCTGCCCTGCCTGTTTTCTCCTTTGTGATTTTATGAGAACAAAGGAGGAAATAGGCAGGCCAGGGA
hsa-mir-3173	chr14	-	95604255	95604322	hsa-mir-3173	hsa-mir-3173_other1	other	0.38		95604297	95604318	TGCCCTGCCTGTTTTCTCCTTT	185	TCCCTGCCCTGCCTGTTTTCTCCTTTGTGATTTTATGAGAACAAAGGAGGAAATAGGCAGGCCAGGGA
hsa-mir-3173	chr14	-	95604255	95604322	hsa-mir-3173	hsa-mir-3173_other2	other	0.13		95604298	95604318	TGCCCTGCCTGTTTTCTCCTT	65	TCCCTGCCCTGCCTGTTTTCTCCTTTGTGATTTTATGAGAACAAAGGAGGAAATAGGCAGGCCAGGGA
hsa-mir-3174	chr15	+	90549986	90550072	hsa-mir-3174	hsa-mir-3174_-2_3	mature	0.32		90549995	90550015	TAGTGAGTTAGAGATGCAGAG	8	GTTACCTGGTAGTGAGTTAGAGATGCAGAGCCCTGGGCTCCTCAGCAAACCTACTGGATCTGCATTTTAATTCACATGCATGGTAAT
hsa-mir-3174	chr15	+	90549986	90550072	hsa-mir-3174	hsa-mir-3174_-1_3	mature	0.2		90549995	90550016	TAGTGAGTTAGAGATGCAGAGC	5	GTTACCTGGTAGTGAGTTAGAGATGCAGAGCCCTGGGCTCCTCAGCAAACCTACTGGATCTGCATTTTAATTCACATGCATGGTAAT
hsa-mir-3174	chr15	+	90549986	90550072	hsa-mir-3174	hsa-mir-3174	mature	0.28	Y	90549995	90550017	TAGTGAGTTAGAGATGCAGAGCC	7	GTTACCTGGTAGTGAGTTAGAGATGCAGAGCCCTGGGCTCCTCAGCAAACCTACTGGATCTGCATTTTAATTCACATGCATGGTAAT
hsa-mir-3177	chr16	+	1784985	1785066	hsa-mir-3177	hsa-mir-3177_-1_3	mature	0.25		1785038	1785057	TGCACGGCACTGGGGACACG	2	CCACGTGCCATGTGTACACACGTGCCAGGCGCTGTCTTGAGACATTCGCGCAGTGCACGGCACTGGGGACACGTGGCACTGG
hsa-mir-3177	chr16	+	1784985	1785066	hsa-mir-3177	hsa-mir-3177	mature	0.75	Y	1785038	1785058	TGCACGGCACTGGGGACACGT	6	CCACGTGCCATGTGTACACACGTGCCAGGCGCTGTCTTGAGACATTCGCGCAGTGCACGGCACTGGGGACACGTGGCACTGG
hsa-mir-3179-1	chr16	+	14995364	14995447	hsa-mir-3179-1-star	hsa-mir-3179-1-star	star	0.3		14995377	14995398	GTTTAAATTACACTCCTTCTGC	48	CAGGATCACAGACGTTTAAATTACACTCCTTCTGCTGTGCCTTACAGCAGTAGAAGGGGTGAAATTTAAACGTCTGTGATCCTG
hsa-mir-3179-1	chr16	+	14995364	14995447	hsa-mir-3179-1-star	hsa-mir-3179-1-star_+1_3_-1_5	star	0.1		14995378	14995399	TTTAAATTACACTCCTTCTGCT	16	CAGGATCACAGACGTTTAAATTACACTCCTTCTGCTGTGCCTTACAGCAGTAGAAGGGGTGAAATTTAAACGTCTGTGATCCTG
hsa-mir-3179-1	chr16	+	14995364	14995447	hsa-mir-3179-1	hsa-mir-3179-1_+1_5	mature	0.11		14995414	14995436	TAGAAGGGGTGAAATTTAAACGT	19	CAGGATCACAGACGTTTAAATTACACTCCTTCTGCTGTGCCTTACAGCAGTAGAAGGGGTGAAATTTAAACGTCTGTGATCCTG
hsa-mir-3179-1	chr16	+	14995364	14995447	hsa-mir-3179-1	hsa-mir-3179-1	mature	0.23	Y	14995415	14995436	AGAAGGGGTGAAATTTAAACGT	38	CAGGATCACAGACGTTTAAATTACACTCCTTCTGCTGTGCCTTACAGCAGTAGAAGGGGTGAAATTTAAACGTCTGTGATCCTG
hsa-mir-3179-2	chr16	+	16394015	16394098	hsa-mir-3179-2-star	hsa-mir-3179-2-star	star	0.3		16394028	16394049	GTTTAAATTACACTCCTTCTGC	48	CAGGATCACAGACGTTTAAATTACACTCCTTCTGCTGTGCCTTACAGCAGTAGAAGGGGTGAAATTTAAACGTCTGTGATCCTG
hsa-mir-3179-2	chr16	+	16394015	16394098	hsa-mir-3179-2-star	hsa-mir-3179-2-star_+1_3_-1_5	star	0.1		16394029	16394050	TTTAAATTACACTCCTTCTGCT	16	CAGGATCACAGACGTTTAAATTACACTCCTTCTGCTGTGCCTTACAGCAGTAGAAGGGGTGAAATTTAAACGTCTGTGATCCTG
hsa-mir-3179-2	chr16	+	16394015	16394098	hsa-mir-3179-2	hsa-mir-3179-2_+1_5	mature	0.11		16394065	16394087	TAGAAGGGGTGAAATTTAAACGT	19	CAGGATCACAGACGTTTAAATTACACTCCTTCTGCTGTGCCTTACAGCAGTAGAAGGGGTGAAATTTAAACGTCTGTGATCCTG
hsa-mir-3179-2	chr16	+	16394015	16394098	hsa-mir-3179-2	hsa-mir-3179-2	mature	0.23	Y	16394066	16394087	AGAAGGGGTGAAATTTAAACGT	38	CAGGATCACAGACGTTTAAATTACACTCCTTCTGCTGTGCCTTACAGCAGTAGAAGGGGTGAAATTTAAACGTCTGTGATCCTG
hsa-mir-3179-3	chr16	-	18505750	18505833	hsa-mir-3179-3	hsa-mir-3179-3	mature	0.23	Y	18505761	18505782	AGAAGGGGTGAAATTTAAACGT	38	CAGGATCACAGACGTTTAAATTACACTCCTTCTGCTGTGCCTTACAGCAGTAGAAGGGGTGAAATTTAAACGTCTGTGATCCTG
hsa-mir-3179-3	chr16	-	18505750	18505833	hsa-mir-3179-3	hsa-mir-3179-3_+1_5	mature	0.11		18505761	18505783	TAGAAGGGGTGAAATTTAAACGT	19	CAGGATCACAGACGTTTAAATTACACTCCTTCTGCTGTGCCTTACAGCAGTAGAAGGGGTGAAATTTAAACGTCTGTGATCCTG
hsa-mir-3179-3	chr16	-	18505750	18505833	hsa-mir-3179-3-star	hsa-mir-3179-3-star_+1_3_-1_5	star	0.1		18505798	18505819	TTTAAATTACACTCCTTCTGCT	16	CAGGATCACAGACGTTTAAATTACACTCCTTCTGCTGTGCCTTACAGCAGTAGAAGGGGTGAAATTTAAACGTCTGTGATCCTG
hsa-mir-3179-3	chr16	-	18505750	18505833	hsa-mir-3179-3-star	hsa-mir-3179-3-star	star	0.3		18505799	18505820	GTTTAAATTACACTCCTTCTGC	48	CAGGATCACAGACGTTTAAATTACACTCCTTCTGCTGTGCCTTACAGCAGTAGAAGGGGTGAAATTTAAACGTCTGTGATCCTG
hsa-mir-3187	chr19	+	813583	813652	hsa-mir-3187	hsa-mir-3187	mature	0.5	Y	813626	813645	TTGGCCATGGGGCTGCGCGG	5	GCTGGCCCTGGGCAGCGTGTGGCTGAAGGTCACCATGTTCTCCTTGGCCATGGGGCTGCGCGGGGCCAGC
hsa-mir-3187	chr19	+	813583	813652	hsa-mir-3187	hsa-mir-3187_+3_3	mature	0.3		813626	813648	TTGGCCATGGGGCTGCGCGGGGC	3	GCTGGCCCTGGGCAGCGTGTGGCTGAAGGTCACCATGTTCTCCTTGGCCATGGGGCTGCGCGGGGCCAGC
hsa-mir-3190	chr19	+	47730198	47730277	hsa-mir-3190	hsa-mir-3190_+1_3_-2_5	mature	0.12		47730246	47730267	TGGAAGGTAGACGGCCAGAGAG	1	CTGGGGTCACCTGTCTGGCCAGCTACGTCCCCACGGCCCTTGTCAGTGTGGAAGGTAGACGGCCAGAGAGGTGACCCCGG
hsa-mir-3194	chr20	-	50069441	50069513	hsa-mir-3194	hsa-mir-3194_+1_3	mature	0.86		50069483	50069504	GGCCAGCCACCAGGAGGGCTGC	189	AGGTGGCAGGGCCAGCCACCAGGAGGGCTGCGTGCCACCCGGGCAGCTCTGCTGCTCACTGGCAGTGTCACCT
hsa-mir-3194	chr20	-	50069441	50069513	hsa-mir-3194	hsa-mir-3194	mature	0.05	Y	50069484	50069504	GGCCAGCCACCAGGAGGGCTG	12	AGGTGGCAGGGCCAGCCACCAGGAGGGCTGCGTGCCACCCGGGCAGCTCTGCTGCTCACTGGCAGTGTCACCT
hsa-mir-32	chr9	-	111808508	111808577	hsa-mir-32*	hsa-mir-32*	mature	0	Y	111808510	111808531	CAATTTAGTGTGTGTGATATTT	25	GGAGATATTGCACATTACTAAGTTGCATGTTGTCACGGCCTCAATGCAATTTAGTGTGTGTGATATTTTC
hsa-mir-32	chr9	-	111808508	111808577	hsa-mir-32	hsa-mir-32	mature	0.12	Y	111808551	111808572	TATTGCACATTACTAAGTTGCA	711	GGAGATATTGCACATTACTAAGTTGCATGTTGTCACGGCCTCAATGCAATTTAGTGTGTGTGATATTTTC
hsa-mir-32	chr9	-	111808508	111808577	hsa-mir-32	hsa-mir-32_-1_3	mature	0.37		111808552	111808572	TATTGCACATTACTAAGTTGC	2163	GGAGATATTGCACATTACTAAGTTGCATGTTGTCACGGCCTCAATGCAATTTAGTGTGTGTGATATTTTC
hsa-mir-32	chr9	-	111808508	111808577	hsa-mir-32	hsa-mir-32_-2_3	mature	0.26		111808553	111808572	TATTGCACATTACTAAGTTG	1556	GGAGATATTGCACATTACTAAGTTGCATGTTGTCACGGCCTCAATGCAATTTAGTGTGTGTGATATTTTC
hsa-mir-3200	chr22	+	31127543	31127627	hsa-mir-3200-3p	hsa-mir-3200-3p_-1_3	mature	0.16		31127596	31127616	CACCTTGCGCTACTCAGGTCT	2	GGTGGTCGAGGGAATCTGAGAAGGCGCACAAGGTTTGTGTCCAATACAGTCCACACCTTGCGCTACTCAGGTCTGCTCGTGCCCT
hsa-mir-3200	chr22	+	31127543	31127627	hsa-mir-3200-3p	hsa-mir-3200-3p	mature	0.25	Y	31127596	31127617	CACCTTGCGCTACTCAGGTCTG	3	GGTGGTCGAGGGAATCTGAGAAGGCGCACAAGGTTTGTGTCCAATACAGTCCACACCTTGCGCTACTCAGGTCTGCTCGTGCCCT
hsa-mir-3200	chr22	+	31127543	31127627	hsa-mir-3200-3p	hsa-mir-3200-3p_+1_3	mature	0.33		31127596	31127618	CACCTTGCGCTACTCAGGTCTGC	4	GGTGGTCGAGGGAATCTGAGAAGGCGCACAAGGTTTGTGTCCAATACAGTCCACACCTTGCGCTACTCAGGTCTGCTCGTGCCCT
hsa-mir-320a	chr8	-	22102474	22102555	hsa-mir-320a	hsa-mir-320a_+2_3	mature	0.17		22102485	22102508	AAAAGCTGGGTTGAGAGGGCGAAA	9932	GCTTCGCTCCCCTCCGCCTTCTCTTCCCGGTTCTTCCCGGAGTCGGGAAAAGCTGGGTTGAGAGGGCGAAAAAGGATGAGGT
hsa-mir-320a	chr8	-	22102474	22102555	hsa-mir-320a	hsa-mir-320a_+1_3	mature	0.2		22102486	22102508	AAAAGCTGGGTTGAGAGGGCGAA	11683	GCTTCGCTCCCCTCCGCCTTCTCTTCCCGGTTCTTCCCGGAGTCGGGAAAAGCTGGGTTGAGAGGGCGAAAAAGGATGAGGT
hsa-mir-320a	chr8	-	22102474	22102555	hsa-mir-320a	hsa-mir-320a	mature	0.43	Y	22102487	22102508	AAAAGCTGGGTTGAGAGGGCGA	25136	GCTTCGCTCCCCTCCGCCTTCTCTTCCCGGTTCTTCCCGGAGTCGGGAAAAGCTGGGTTGAGAGGGCGAAAAAGGATGAGGT
hsa-mir-320b-1	chr1	+	117214370	117214448	hsa-mir-320b-1	hsa-mir-320b-1_other1	other	0.19		117214408	117214425	AAAAGCTGGGTTGAGAGG	1243	AATTAATCCCTCTCTTTCTAGTTCTTCCTAGAGTGAGGAAAAGCTGGGTTGAGAGGGCAAACAAATTAACTAATTAATT
hsa-mir-320b-1	chr1	+	117214370	117214448	hsa-mir-320b-1	hsa-mir-320b-1_-2_3	mature	0.25		117214408	117214427	AAAAGCTGGGTTGAGAGGGC	1623	AATTAATCCCTCTCTTTCTAGTTCTTCCTAGAGTGAGGAAAAGCTGGGTTGAGAGGGCAAACAAATTAACTAATTAATT
hsa-mir-320b-1	chr1	+	117214370	117214448	hsa-mir-320b-1	hsa-mir-320b-1	mature	0.14	Y	117214408	117214429	AAAAGCTGGGTTGAGAGGGCAA	946	AATTAATCCCTCTCTTTCTAGTTCTTCCTAGAGTGAGGAAAAGCTGGGTTGAGAGGGCAAACAAATTAACTAATTAATT
hsa-mir-320b-2	chr1	-	224444705	224444842	hsa-mir-320b-2	hsa-mir-320b-2	mature	0.14	Y	224444750	224444771	AAAAGCTGGGTTGAGAGGGCAA	946	TGTTATTTTTTGTCTTCTACCTAAGAATTCTGTCTCTTAGGCTTTCTCTTCCCAGATTTCCCAAAGTTGGGAAAAGCTGGGTTGAGAGGGCAAAAGGAAAAAAAAAGAATTCTGTCTCTGACATAATTAGATAGGGAA
hsa-mir-320b-2	chr1	-	224444705	224444842	hsa-mir-320b-2	hsa-mir-320b-2_-2_3	mature	0.25		224444752	224444771	AAAAGCTGGGTTGAGAGGGC	1623	TGTTATTTTTTGTCTTCTACCTAAGAATTCTGTCTCTTAGGCTTTCTCTTCCCAGATTTCCCAAAGTTGGGAAAAGCTGGGTTGAGAGGGCAAAAGGAAAAAAAAAGAATTCTGTCTCTGACATAATTAGATAGGGAA
hsa-mir-320b-2	chr1	-	224444705	224444842	hsa-mir-320b-2	hsa-mir-320b-2_other1	other	0.19		224444754	224444771	AAAAGCTGGGTTGAGAGG	1243	TGTTATTTTTTGTCTTCTACCTAAGAATTCTGTCTCTTAGGCTTTCTCTTCCCAGATTTCCCAAAGTTGGGAAAAGCTGGGTTGAGAGGGCAAAAGGAAAAAAAAAGAATTCTGTCTCTGACATAATTAGATAGGGAA
hsa-mir-320c-1	chr18	+	19263470	19263557	hsa-mir-320c-1	hsa-mir-320c-1_-2_3	mature	0.37		19263519	19263536	AAAAGCTGGGTTGAGAGG	1243	TTTGCATTAAAAATGAGGCCTTCTCTTCCCAGTTCTTCCCAGAGTCAGGAAAAGCTGGGTTGAGAGGGTAGAAAAAAAATGATGTAGG
hsa-mir-320c-1	chr18	+	19263470	19263557	hsa-mir-320c-1	hsa-mir-320c-1_-1_3	mature	0.19		19263519	19263537	AAAAGCTGGGTTGAGAGGG	634	TTTGCATTAAAAATGAGGCCTTCTCTTCCCAGTTCTTCCCAGAGTCAGGAAAAGCTGGGTTGAGAGGGTAGAAAAAAAATGATGTAGG
hsa-mir-320c-1	chr18	+	19263470	19263557	hsa-mir-320c-1	hsa-mir-320c-1	mature	0.16	Y	19263519	19263538	AAAAGCTGGGTTGAGAGGGT	538	TTTGCATTAAAAATGAGGCCTTCTCTTCCCAGTTCTTCCCAGAGTCAGGAAAAGCTGGGTTGAGAGGGTAGAAAAAAAATGATGTAGG
hsa-mir-320c-2	chr18	+	21901649	21901698	hsa-mir-320c-2	hsa-mir-320c-2_-2_3	mature	0.32		21901679	21901696	AAAAGCTGGGTTGAGAGG	1243	CTTCTCTTTCCAGTTCTTCCCAGAATTGGGAAAAGCTGGGTTGAGAGGGT
hsa-mir-320c-2	chr18	+	21901649	21901698	hsa-mir-320c-2	hsa-mir-320c-2_-1_3	mature	0.16		21901679	21901697	AAAAGCTGGGTTGAGAGGG	634	CTTCTCTTTCCAGTTCTTCCCAGAATTGGGAAAAGCTGGGTTGAGAGGGT
hsa-mir-320c-2	chr18	+	21901649	21901698	hsa-mir-320c-2	hsa-mir-320c-2	mature	0.14	Y	21901679	21901698	AAAAGCTGGGTTGAGAGGGT	538	CTTCTCTTTCCAGTTCTTCCCAGAATTGGGAAAAGCTGGGTTGAGAGGGT
hsa-mir-320c-2	chr18	+	21901649	21901698	hsa-mir-320c-2	hsa-mir-320c-2_+2_3	mature	0.12		21901679	21901700	AAAAGCTGGGTTGAGAGGGTAA	479	CTTCTCTTTCCAGTTCTTCCCAGAATTGGGAAAAGCTGGGTTGAGAGGGT
hsa-mir-320d-1	chr13	-	41301963	41302010	hsa-mir-320d-1	hsa-mir-320d-1_+1_3	mature	0.12		41301962	41301981	AAAAGCTGGGTTGAGAGGAT	277	TTCTCGTCCCAGTTCTTCCCAAAGTTGAGAAAAGCTGGGTTGAGAGGA
hsa-mir-320d-1	chr13	-	41301963	41302010	hsa-mir-320d-1	hsa-mir-320d-1	mature	0.06	Y	41301963	41301981	AAAAGCTGGGTTGAGAGGA	139	TTCTCGTCCCAGTTCTTCCCAAAGTTGAGAAAAGCTGGGTTGAGAGGA
hsa-mir-320d-1	chr13	-	41301963	41302010	hsa-mir-320d-1	hsa-mir-320d-1_-1_3	mature	0.56		41301964	41301981	AAAAGCTGGGTTGAGAGG	1243	TTCTCGTCCCAGTTCTTCCCAAAGTTGAGAAAAGCTGGGTTGAGAGGA
hsa-mir-320d-1	chr13	-	41301963	41302010	hsa-mir-320d-1	hsa-mir-320d-1_-2_3	mature	0.11		41301965	41301981	AAAAGCTGGGTTGAGAG	266	TTCTCGTCCCAGTTCTTCCCAAAGTTGAGAAAAGCTGGGTTGAGAGGA
hsa-mir-320d-2	chrX	-	140008336	140008383	hsa-mir-320d-2	hsa-mir-320d-2	mature	0.06	Y	140008336	140008354	AAAAGCTGGGTTGAGAGGA	139	TTCTCTTCCCAGTTCTTCTTGGAGTCAGGAAAAGCTGGGTTGAGAGGA
hsa-mir-320d-2	chrX	-	140008336	140008383	hsa-mir-320d-2	hsa-mir-320d-2_-1_3	mature	0.59		140008337	140008354	AAAAGCTGGGTTGAGAGG	1243	TTCTCTTCCCAGTTCTTCTTGGAGTCAGGAAAAGCTGGGTTGAGAGGA
hsa-mir-320d-2	chrX	-	140008336	140008383	hsa-mir-320d-2	hsa-mir-320d-2_-2_3	mature	0.12		140008338	140008354	AAAAGCTGGGTTGAGAG	266	TTCTCTTCCCAGTTCTTCTTGGAGTCAGGAAAAGCTGGGTTGAGAGGA
hsa-mir-320e	chr19	-	47212549	47212601	hsa-mir-320e	hsa-mir-320e_-1_3_+1_5	mature	0.28		47212551	47212568	AAAAGCTGGGTTGAGAAG	67	GCCTTCTCTTCCCAGTTCTTCCTGGAGTCGGGGAAAAGCTGGGTTGAGAAGGT
hsa-mir-320e	chr19	-	47212549	47212601	hsa-mir-320e	hsa-mir-320e_other1	other	0.45		47212553	47212568	AAAAGCTGGGTTGAGA	108	GCCTTCTCTTCCCAGTTCTTCCTGGAGTCGGGGAAAAGCTGGGTTGAGAAGGT
hsa-mir-320e	chr19	-	47212549	47212601	hsa-mir-320e	hsa-mir-320e_other2	other	0.18		47212554	47212568	AAAAGCTGGGTTGAG	44	GCCTTCTCTTCCCAGTTCTTCCTGGAGTCGGGGAAAAGCTGGGTTGAGAAGGT
hsa-mir-323b	chr14	+	101522555	101522636	hsa-mir-323b-3p	hsa-mir-323b-3p_-1_3	mature	1		101522605	101522625	CCCAATACACGGTCGACCTCT	7	TGGTACTCGGAGGGAGGTTGTCCGTGGTGAGTTCGCATTATTTAATGATGCCCAATACACGGTCGACCTCTTTTCGGTATCA
hsa-mir-324	chr17	-	7126615	7126697	hsa-mir-324-3p	hsa-mir-324-3p	mature	0.02	Y	7126626	7126645	ACTGCCCCAGGTGCTGCTGG	49	CTGACTATGCCTCCCCGCATCCCCTAGGGCATTGGTGTAAAGCTGGAGACCCACTGCCCCAGGTGCTGCTGGGGGTTGTAGTC
hsa-mir-324	chr17	-	7126615	7126697	hsa-mir-324-5p	hsa-mir-324-5p	mature	0.21	Y	7126660	7126682	CGCATCCCCTAGGGCATTGGTGT	461	CTGACTATGCCTCCCCGCATCCCCTAGGGCATTGGTGTAAAGCTGGAGACCCACTGCCCCAGGTGCTGCTGGGGGTTGTAGTC
hsa-mir-324	chr17	-	7126615	7126697	hsa-mir-324-3p-star	hsa-mir-324-3p-star_+2_3	star	0.23		7126661	7126682	CGCATCCCCTAGGGCATTGGTG	501	CTGACTATGCCTCCCCGCATCCCCTAGGGCATTGGTGTAAAGCTGGAGACCCACTGCCCCAGGTGCTGCTGGGGGTTGTAGTC
hsa-mir-324	chr17	-	7126615	7126697	hsa-mir-324-3p-star	hsa-mir-324-3p-star_+1_3	star	0.2		7126662	7126682	CGCATCCCCTAGGGCATTGGT	441	CTGACTATGCCTCCCCGCATCCCCTAGGGCATTGGTGTAAAGCTGGAGACCCACTGCCCCAGGTGCTGCTGGGGGTTGTAGTC
hsa-mir-326	chr11	-	75046135	75046229	hsa-mir-326	hsa-mir-326_+1_3	mature	0.86		75046150	75046170	CCTCTGGGCCCTTCCTCCAGC	151	CTCATCTGTCTGTTGGGCTGGAGGCAGGGCCTTTGTGAAGGCGGGTGGTGCTCAGATCGCCTCTGGGCCCTTCCTCCAGCCCCGAGGCGGATTCA
hsa-mir-326	chr11	-	75046135	75046229	hsa-mir-326	hsa-mir-326	mature	0.09	Y	75046151	75046170	CCTCTGGGCCCTTCCTCCAG	16	CTCATCTGTCTGTTGGGCTGGAGGCAGGGCCTTTGTGAAGGCGGGTGGTGCTCAGATCGCCTCTGGGCCCTTCCTCCAGCCCCGAGGCGGATTCA
hsa-mir-328	chr16	-	67236223	67236297	hsa-mir-328	hsa-mir-328_+1_3	mature	0.19		67236228	67236250	CTGGCCCTCTCTGCCCTTCCGTC	51	TGGAGTGGGGGGGCAGGAGGGGCTCAGGGAGAAAGTGCATACAGCCCCTGGCCCTCTCTGCCCTTCCGTCCCCTG
hsa-mir-328	chr16	-	67236223	67236297	hsa-mir-328	hsa-mir-328	mature	0.67	Y	67236229	67236250	CTGGCCCTCTCTGCCCTTCCGT	181	TGGAGTGGGGGGGCAGGAGGGGCTCAGGGAGAAAGTGCATACAGCCCCTGGCCCTCTCTGCCCTTCCGTCCCCTG
hsa-mir-330	chr19	-	46142251	46142344	hsa-mir-330-3p	hsa-mir-330-3p	mature	0.12	Y	46142266	46142288	GCAAAGCACACGGCCTGCAGAGA	61	CTTTGGCGATCACTGCCTCTCTGGGCCTGTGTCTTAGGCTCTGCAAGATCAACCGAGCAAAGCACACGGCCTGCAGAGAGGCAGCGCTCTGCCC
hsa-mir-330	chr19	-	46142251	46142344	hsa-mir-330-5p	hsa-mir-330-5p_+1_3	mature	0.1		46142305	46142327	TCTCTGGGCCTGTGTCTTAGGCT	52	CTTTGGCGATCACTGCCTCTCTGGGCCTGTGTCTTAGGCTCTGCAAGATCAACCGAGCAAAGCACACGGCCTGCAGAGAGGCAGCGCTCTGCCC
hsa-mir-330	chr19	-	46142251	46142344	hsa-mir-330-5p	hsa-mir-330-5p	mature	0.07	Y	46142306	46142327	TCTCTGGGCCTGTGTCTTAGGC	35	CTTTGGCGATCACTGCCTCTCTGGGCCTGTGTCTTAGGCTCTGCAAGATCAACCGAGCAAAGCACACGGCCTGCAGAGAGGCAGCGCTCTGCCC
hsa-mir-331	chr12	+	95702195	95702288	hsa-mir-331-5p	hsa-mir-331-5p	mature	0.02	Y	95702220	95702241	CTAGGTATGGTCCCAGGGATCC	169	GAGTTTGGTTTTGTTTGGGTTTGTTCTAGGTATGGTCCCAGGGATCCCAGATCAAACCAGGCCCCTGGGCCTATCCTAGAACCAACCTAAGCTC
hsa-mir-331	chr12	+	95702195	95702288	hsa-mir-331-3p	hsa-mir-331-3p	mature	0.23	Y	95702255	95702275	GCCCCTGGGCCTATCCTAGAA	1570	GAGTTTGGTTTTGTTTGGGTTTGTTCTAGGTATGGTCCCAGGGATCCCAGATCAAACCAGGCCCCTGGGCCTATCCTAGAACCAACCTAAGCTC
hsa-mir-331	chr12	+	95702195	95702288	hsa-mir-331-3p	hsa-mir-331-3p_+1_3	mature	0.31		95702255	95702276	GCCCCTGGGCCTATCCTAGAAC	2090	GAGTTTGGTTTTGTTTGGGTTTGTTCTAGGTATGGTCCCAGGGATCCCAGATCAAACCAGGCCCCTGGGCCTATCCTAGAACCAACCTAAGCTC
hsa-mir-335	chr7	+	130135951	130136044	hsa-mir-335	hsa-mir-335_-2_3	mature	0.1		130135966	130135986	TCAAGAGCAATAACGAAAAAT	28562	TGTTTTGAGCGGGGGTCAAGAGCAATAACGAAAAATGTTTGTCATAAACCGTTTTTCATTATTGCTCCTGACCTCCTCTCATTTGCTATATTCA
hsa-mir-335	chr7	+	130135951	130136044	hsa-mir-335	hsa-mir-335_-1_3	mature	0.25		130135966	130135987	TCAAGAGCAATAACGAAAAATG	71933	TGTTTTGAGCGGGGGTCAAGAGCAATAACGAAAAATGTTTGTCATAAACCGTTTTTCATTATTGCTCCTGACCTCCTCTCATTTGCTATATTCA
hsa-mir-335	chr7	+	130135951	130136044	hsa-mir-335	hsa-mir-335	mature	0.02	Y	130135966	130135988	TCAAGAGCAATAACGAAAAATGT	6451	TGTTTTGAGCGGGGGTCAAGAGCAATAACGAAAAATGTTTGTCATAAACCGTTTTTCATTATTGCTCCTGACCTCCTCTCATTTGCTATATTCA
hsa-mir-335	chr7	+	130135951	130136044	hsa-mir-335*	hsa-mir-335*_-1_3	mature	0.15		130136002	130136022	TTTTTCATTATTGCTCCTGAC	43974	TGTTTTGAGCGGGGGTCAAGAGCAATAACGAAAAATGTTTGTCATAAACCGTTTTTCATTATTGCTCCTGACCTCCTCTCATTTGCTATATTCA
hsa-mir-335	chr7	+	130135951	130136044	hsa-mir-335*	hsa-mir-335*	mature	0.35	Y	130136002	130136023	TTTTTCATTATTGCTCCTGACC	99677	TGTTTTGAGCGGGGGTCAAGAGCAATAACGAAAAATGTTTGTCATAAACCGTTTTTCATTATTGCTCCTGACCTCCTCTCATTTGCTATATTCA
hsa-mir-338	chr17	-	79099682	79099748	hsa-mir-338-3p	hsa-mir-338-3p_+1_3	mature	0.15		79099685	79099707	TCCAGCATCAGTGATTTTGTTGA	3	TCTCCAACAATATCCTGGTGCTGAGTGATGACTCAGGCGACTCCAGCATCAGTGATTTTGTTGAAGA
hsa-mir-338	chr17	-	79099682	79099748	hsa-mir-338-3p	hsa-mir-338-3p	mature	0.6	Y	79099686	79099707	TCCAGCATCAGTGATTTTGTTG	12	TCTCCAACAATATCCTGGTGCTGAGTGATGACTCAGGCGACTCCAGCATCAGTGATTTTGTTGAAGA
hsa-mir-338	chr17	-	79099682	79099748	hsa-mir-338-3p	hsa-mir-338-3p_-1_3	mature	0.15		79099687	79099707	TCCAGCATCAGTGATTTTGTT	3	TCTCCAACAATATCCTGGTGCTGAGTGATGACTCAGGCGACTCCAGCATCAGTGATTTTGTTGAAGA
hsa-mir-338	chr17	-	79099682	79099748	hsa-mir-338-5p	hsa-mir-338-5p_-1_3	mature	0.1		79099723	79099743	AACAATATCCTGGTGCTGAGT	2	TCTCCAACAATATCCTGGTGCTGAGTGATGACTCAGGCGACTCCAGCATCAGTGATTTTGTTGAAGA
hsa-mir-339	chr7	-	1062568	1062661	hsa-mir-339-3p	hsa-mir-339-3p	mature	0	Y	1062590	1062612	TGAGCGCCTCGACGACAGAGCCG	163	CGGGGCGGCCGCTCTCCCTGTCCTCCAGGAGCTCACGTGTGCCTGCCTGTGAGCGCCTCGACGACAGAGCCGGCGCCTGCCCCAGTGTCTGCGC
hsa-mir-339	chr7	-	1062568	1062661	hsa-mir-339-5p	hsa-mir-339-5p	mature	0.12	Y	1062625	1062647	TCCCTGTCCTCCAGGAGCTCACG	6128	CGGGGCGGCCGCTCTCCCTGTCCTCCAGGAGCTCACGTGTGCCTGCCTGTGAGCGCCTCGACGACAGAGCCGGCGCCTGCCCCAGTGTCTGCGC
hsa-mir-339	chr7	-	1062568	1062661	hsa-mir-339-5p	hsa-mir-339-5p_-1_3	mature	0.23		1062626	1062647	TCCCTGTCCTCCAGGAGCTCAC	11479	CGGGGCGGCCGCTCTCCCTGTCCTCCAGGAGCTCACGTGTGCCTGCCTGTGAGCGCCTCGACGACAGAGCCGGCGCCTGCCCCAGTGTCTGCGC
hsa-mir-339	chr7	-	1062568	1062661	hsa-mir-339-5p	hsa-mir-339-5p_-2_3	mature	0.27		1062627	1062647	TCCCTGTCCTCCAGGAGCTCA	13804	CGGGGCGGCCGCTCTCCCTGTCCTCCAGGAGCTCACGTGTGCCTGCCTGTGAGCGCCTCGACGACAGAGCCGGCGCCTGCCCCAGTGTCTGCGC
hsa-mir-339	chr7	-	1062568	1062661	hsa-mir-339-5p	hsa-mir-339-5p_-3_3	mature	0.27		1062628	1062647	TCCCTGTCCTCCAGGAGCTC	13724	CGGGGCGGCCGCTCTCCCTGTCCTCCAGGAGCTCACGTGTGCCTGCCTGTGAGCGCCTCGACGACAGAGCCGGCGCCTGCCCCAGTGTCTGCGC
hsa-mir-33a	chr22	+	42296947	42297015	hsa-mir-33a	hsa-mir-33a_-1_3	mature	0.24		42296952	42296971	GTGCATTGTAGTTGCATTGC	1716	CTGTGGTGCATTGTAGTTGCATTGCATGTTCTGGTGGTACCCATGCAATGTTTCCACAGTGCATCACAG
hsa-mir-33a	chr22	+	42296947	42297015	hsa-mir-33a	hsa-mir-33a	mature	0.26	Y	42296952	42296972	GTGCATTGTAGTTGCATTGCA	1859	CTGTGGTGCATTGTAGTTGCATTGCATGTTCTGGTGGTACCCATGCAATGTTTCCACAGTGCATCACAG
hsa-mir-33a	chr22	+	42296947	42297015	hsa-mir-33a	hsa-mir-33a_+1_3	mature	0.1		42296952	42296973	GTGCATTGTAGTTGCATTGCAT	720	CTGTGGTGCATTGTAGTTGCATTGCATGTTCTGGTGGTACCCATGCAATGTTTCCACAGTGCATCACAG
hsa-mir-33a	chr22	+	42296947	42297015	hsa-mir-33a	hsa-mir-33a_other1	other	0.21		42296973	42296991	TGTTCTGGTGGTACCCATG	1518	CTGTGGTGCATTGTAGTTGCATTGCATGTTCTGGTGGTACCCATGCAATGTTTCCACAGTGCATCACAG
hsa-mir-33a	chr22	+	42296947	42297015	hsa-mir-33a*	hsa-mir-33a*	mature	0	Y	42296992	42297013	CAATGTTTCCACAGTGCATCAC	43	CTGTGGTGCATTGTAGTTGCATTGCATGTTCTGGTGGTACCCATGCAATGTTTCCACAGTGCATCACAG
hsa-mir-33b	chr17	-	17717149	17717244	hsa-mir-33b	hsa-mir-33b	mature	0.48	Y	17717210	17717229	GTGCATTGCTGTTGCATTGC	2390	GCGGGCGGCCCCGCGGTGCATTGCTGTTGCATTGCACGTGTGTGAGGCGGGTGCAGTGCCTCGGCAGTGCAGCCCGGAGCCGGCCCCTGGCACCAC
hsa-mir-33b	chr17	-	17717149	17717244	hsa-mir-33b	hsa-mir-33b_-1_3	mature	0.34		17717211	17717229	GTGCATTGCTGTTGCATTG	1702	GCGGGCGGCCCCGCGGTGCATTGCTGTTGCATTGCACGTGTGTGAGGCGGGTGCAGTGCCTCGGCAGTGCAGCCCGGAGCCGGCCCCTGGCACCAC
hsa-mir-340	chr5	-	179442302	179442396	hsa-mir-340*	hsa-mir-340*_+1_3	mature	0.11		179442317	179442339	TCCGTCTCAGTTACTTTATAGCC	1582	TTGTACCTGGTGTGATTATAAAGCAATGAGACTGATTGTCATATGTCGTTTGTGGGATCCGTCTCAGTTACTTTATAGCCATACCTGGTATCTTA
hsa-mir-340	chr5	-	179442302	179442396	hsa-mir-340*	hsa-mir-340*	mature	0.01	Y	179442318	179442339	TCCGTCTCAGTTACTTTATAGC	174	TTGTACCTGGTGTGATTATAAAGCAATGAGACTGATTGTCATATGTCGTTTGTGGGATCCGTCTCAGTTACTTTATAGCCATACCTGGTATCTTA
hsa-mir-340	chr5	-	179442302	179442396	hsa-mir-340	hsa-mir-340	mature	0.62	Y	179442360	179442381	TTATAAAGCAATGAGACTGATT	8885	TTGTACCTGGTGTGATTATAAAGCAATGAGACTGATTGTCATATGTCGTTTGTGGGATCCGTCTCAGTTACTTTATAGCCATACCTGGTATCTTA
hsa-mir-340	chr5	-	179442302	179442396	hsa-mir-340	hsa-mir-340_-1_3	mature	0.2		179442361	179442381	TTATAAAGCAATGAGACTGAT	2891	TTGTACCTGGTGTGATTATAAAGCAATGAGACTGATTGTCATATGTCGTTTGTGGGATCCGTCTCAGTTACTTTATAGCCATACCTGGTATCTTA
hsa-mir-342	chr14	+	100575991	100576089	hsa-mir-342-5p	hsa-mir-342-5p	mature	0	Y	100576009	100576029	AGGGGTGCTATCTGTGATTGA	7	GAAACTGGGCTCAAGGTGAGGGGTGCTATCTGTGATTGAGGGACATGGTTAATGGAATTGTCTCACACAGAAATCGCACCCGTCACCTTGGCCTACTTA
hsa-mir-342	chr14	+	100575991	100576089	hsa-mir-342-3p	hsa-mir-342-3p	mature	0.25	Y	100576051	100576073	TCTCACACAGAAATCGCACCCGT	3156	GAAACTGGGCTCAAGGTGAGGGGTGCTATCTGTGATTGAGGGACATGGTTAATGGAATTGTCTCACACAGAAATCGCACCCGTCACCTTGGCCTACTTA
hsa-mir-342	chr14	+	100575991	100576089	hsa-mir-342-3p	hsa-mir-342-3p_+1_3	mature	0.44		100576051	100576074	TCTCACACAGAAATCGCACCCGTC	5541	GAAACTGGGCTCAAGGTGAGGGGTGCTATCTGTGATTGAGGGACATGGTTAATGGAATTGTCTCACACAGAAATCGCACCCGTCACCTTGGCCTACTTA
hsa-mir-342	chr14	+	100575991	100576089	hsa-mir-342-3p	hsa-mir-342-3p_+2_3	mature	0.17		100576051	100576075	TCTCACACAGAAATCGCACCCGTCA	2236	GAAACTGGGCTCAAGGTGAGGGGTGCTATCTGTGATTGAGGGACATGGTTAATGGAATTGTCTCACACAGAAATCGCACCCGTCACCTTGGCCTACTTA
hsa-mir-345	chr14	+	100774195	100774292	hsa-mir-345	hsa-mir-345_-1_3	mature	0.12		100774212	100774232	GCTGACTCCTAGTCCAGGGCT	799	ACCCAAACCCTAGGTCTGCTGACTCCTAGTCCAGGGCTCGTGATGGCTGGTGGGCCCTGAACGAGGGGTCTGGAGGCCTGGGTTTGAATATCGACAGC
hsa-mir-345	chr14	+	100774195	100774292	hsa-mir-345	hsa-mir-345	mature	0.47	Y	100774212	100774233	GCTGACTCCTAGTCCAGGGCTC	3083	ACCCAAACCCTAGGTCTGCTGACTCCTAGTCCAGGGCTCGTGATGGCTGGTGGGCCCTGAACGAGGGGTCTGGAGGCCTGGGTTTGAATATCGACAGC
hsa-mir-345	chr14	+	100774195	100774292	hsa-mir-345	hsa-mir-345_+1_3	mature	0.27		100774212	100774234	GCTGACTCCTAGTCCAGGGCTCG	1800	ACCCAAACCCTAGGTCTGCTGACTCCTAGTCCAGGGCTCGTGATGGCTGGTGGGCCCTGAACGAGGGGTCTGGAGGCCTGGGTTTGAATATCGACAGC
hsa-mir-346	chr10	-	88024450	88024544	hsa-mir-346	hsa-mir-346	mature	0.77	Y	88024503	88024525	TGTCTGCCCGCATGCCTGCCTCT	102	GGTCTCTGTGTTGGGCGTCTGTCTGCCCGCATGCCTGCCTCTCTGTTGCTCTGAAGGAGGCAGGGGCTGGGCCTGCAGCTGCCTGGGCAGAGCGG
hsa-mir-346	chr10	-	88024450	88024544	hsa-mir-346	hsa-mir-346_-1_3	mature	0.12		88024504	88024525	TGTCTGCCCGCATGCCTGCCTC	16	GGTCTCTGTGTTGGGCGTCTGTCTGCCCGCATGCCTGCCTCTCTGTTGCTCTGAAGGAGGCAGGGGCTGGGCCTGCAGCTGCCTGGGCAGAGCGG
hsa-mir-34a	chr1	-	9211726	9211835	hsa-mir-34a*	hsa-mir-34a*	mature	0.02	Y	9211751	9211772	CAATCAGCAAGTATACTGCCCT	843	GGCCAGCTGTGAGTGTTTCTTTGGCAGTGTCTTAGCTGGTTGTTGTGAGCAATAGTAAGGAAGCAATCAGCAAGTATACTGCCCTAGAAGTGCTGCACGTTGTGGGGCCC
hsa-mir-34a	chr1	-	9211726	9211835	hsa-mir-34a	hsa-mir-34a_+1_3	mature	0.3		9211792	9211814	TGGCAGTGTCTTAGCTGGTTGTT	10931	GGCCAGCTGTGAGTGTTTCTTTGGCAGTGTCTTAGCTGGTTGTTGTGAGCAATAGTAAGGAAGCAATCAGCAAGTATACTGCCCTAGAAGTGCTGCACGTTGTGGGGCCC
hsa-mir-34a	chr1	-	9211726	9211835	hsa-mir-34a	hsa-mir-34a	mature	0.39	Y	9211793	9211814	TGGCAGTGTCTTAGCTGGTTGT	14410	GGCCAGCTGTGAGTGTTTCTTTGGCAGTGTCTTAGCTGGTTGTTGTGAGCAATAGTAAGGAAGCAATCAGCAAGTATACTGCCCTAGAAGTGCTGCACGTTGTGGGGCCC
hsa-mir-34b	chr11	+	111383662	111383745	hsa-mir-34b*	hsa-mir-34b*_+1_3_-1_5	mature	0.26		111383675	111383697	AGGCAGTGTCATTAGCTGATTGT	9	GTGCTCGGTTTGTAGGCAGTGTCATTAGCTGATTGTACTGTGGTGGTTACAATCACTAACTCCACTGCCATCAAAACAAGGCAC
hsa-mir-34b	chr11	+	111383662	111383745	hsa-mir-34b	hsa-mir-34b	mature	0.08	Y	111383711	111383732	CAATCACTAACTCCACTGCCAT	3	GTGCTCGGTTTGTAGGCAGTGTCATTAGCTGATTGTACTGTGGTGGTTACAATCACTAACTCCACTGCCATCAAAACAAGGCAC
hsa-mir-34b	chr11	+	111383662	111383745	hsa-mir-34b	hsa-mir-34b_+1_3	mature	0.11		111383711	111383733	CAATCACTAACTCCACTGCCATC	4	GTGCTCGGTTTGTAGGCAGTGTCATTAGCTGATTGTACTGTGGTGGTTACAATCACTAACTCCACTGCCATCAAAACAAGGCAC
hsa-mir-34b	chr11	+	111383662	111383745	hsa-mir-34b	hsa-mir-34b_+1_3_-1_5	mature	0.38		111383712	111383733	AATCACTAACTCCACTGCCATC	13	GTGCTCGGTTTGTAGGCAGTGTCATTAGCTGATTGTACTGTGGTGGTTACAATCACTAACTCCACTGCCATCAAAACAAGGCAC
hsa-mir-34c	chr11	+	111384163	111384239	hsa-mir-34c-5p	hsa-mir-34c-5p	mature	0.83	Y	111384175	111384197	AGGCAGTGTAGTTAGCTGATTGC	85	AGTCTAGTTACTAGGCAGTGTAGTTAGCTGATTGCTAATAGTACCAATCACTAACCACACGGCCAGGTAAAAAGATT
hsa-mir-34c	chr11	+	111384163	111384239	hsa-mir-34c-3p	hsa-mir-34c-3p	mature	0.05	Y	111384208	111384229	AATCACTAACCACACGGCCAGG	6	AGTCTAGTTACTAGGCAGTGTAGTTAGCTGATTGCTAATAGTACCAATCACTAACCACACGGCCAGGTAAAAAGATT
hsa-mir-3605	chr1	-	33797993	33798092	hsa-mir-3605-3p	hsa-mir-3605-3p	mature	0.37	Y	33798005	33798027	CCTCCGTGTTACCTGTCCTCTAG	25	ACTTTATACGTGTAATTGTGATGAGGATGGATAGCAAGGAAGCCGCTCCCACCTGACCCTCACGGCCTCCGTGTTACCTGTCCTCTAGGTGGGACGCTCG
hsa-mir-3605	chr1	-	33797993	33798092	hsa-mir-3605-3p	hsa-mir-3605-3p_-2_3	mature	0.28		33798007	33798027	CCTCCGTGTTACCTGTCCTCT	19	ACTTTATACGTGTAATTGTGATGAGGATGGATAGCAAGGAAGCCGCTCCCACCTGACCCTCACGGCCTCCGTGTTACCTGTCCTCTAGGTGGGACGCTCG
hsa-mir-3605	chr1	-	33797993	33798092	hsa-mir-3605-5p	hsa-mir-3605-5p	mature	0.02	Y	33798049	33798071	TGAGGATGGATAGCAAGGAAGCC	2	ACTTTATACGTGTAATTGTGATGAGGATGGATAGCAAGGAAGCCGCTCCCACCTGACCCTCACGGCCTCCGTGTTACCTGTCCTCTAGGTGGGACGCTCG
hsa-mir-3607	chr5	+	85916313	85916391	hsa-mir-3607	hsa-mir-3607_other1	other	0.32		85916323	85916337	TGCATGTGATGAAGC	9	AAGGTTGCGGTGCATGTGATGAAGCAAATCAGTATGAATGAATTCATGATACTGTAAACGCTTTCTGATGTACTACTCA
hsa-mir-3607	chr5	+	85916313	85916391	hsa-mir-3607-5p	hsa-mir-3607-5p	mature	0.03	Y	85916324	85916345	GCATGTGATGAAGCAAATCAGT	1	AAGGTTGCGGTGCATGTGATGAAGCAAATCAGTATGAATGAATTCATGATACTGTAAACGCTTTCTGATGTACTACTCA
hsa-mir-3607	chr5	+	85916313	85916391	hsa-mir-3607-3p	hsa-mir-3607-3p	mature	0.03	Y	85916363	85916382	ACTGTAAACGCTTTCTGATG	1	AAGGTTGCGGTGCATGTGATGAAGCAAATCAGTATGAATGAATTCATGATACTGTAAACGCTTTCTGATGTACTACTCA
hsa-mir-3607	chr5	+	85916313	85916391	hsa-mir-3607-3p	hsa-mir-3607-3p_-3_5	mature	0.21		85916366	85916382	GTAAACGCTTTCTGATG	6	AAGGTTGCGGTGCATGTGATGAAGCAAATCAGTATGAATGAATTCATGATACTGTAAACGCTTTCTGATGTACTACTCA
hsa-mir-3609	chr7	+	98479272	98479351	hsa-mir-3609	hsa-mir-3609_other1	other	0.11		98479321	98479336	GCAAAGTGATGAGTAA	16	GTAACAGTAACTTTTATTCTCATTTTCCTTTTCTCTACCTTGTAGAGAAGCAAAGTGATGAGTAATACTGGCTGGAGCCC
hsa-mir-3609	chr7	+	98479272	98479351	hsa-mir-3609	hsa-mir-3609_other2	other	0.38		98479321	98479337	GCAAAGTGATGAGTAAT	52	GTAACAGTAACTTTTATTCTCATTTTCCTTTTCTCTACCTTGTAGAGAAGCAAAGTGATGAGTAATACTGGCTGGAGCCC
hsa-mir-3609	chr7	+	98479272	98479351	hsa-mir-3609	hsa-mir-3609_other3	other	0.11		98479321	98479338	GCAAAGTGATGAGTAATA	15	GTAACAGTAACTTTTATTCTCATTTTCCTTTTCTCTACCTTGTAGAGAAGCAAAGTGATGAGTAATACTGGCTGGAGCCC
hsa-mir-361	chrX	-	85158640	85158711	hsa-mir-361-3p	hsa-mir-361-3p	mature	0.13	Y	85158645	85158667	TCCCCCAGGTGTGATTCTGATTT	3462	GGAGCTTATCAGAATCTCCAGGGGTACTTTATAATTTCAAAAAGTCCCCCAGGTGTGATTCTGATTTGCTTC
hsa-mir-361	chrX	-	85158640	85158711	hsa-mir-361-5p	hsa-mir-361-5p_+1_3	mature	0.1		85158684	85158706	TTATCAGAATCTCCAGGGGTACT	2597	GGAGCTTATCAGAATCTCCAGGGGTACTTTATAATTTCAAAAAGTCCCCCAGGTGTGATTCTGATTTGCTTC
hsa-mir-361	chrX	-	85158640	85158711	hsa-mir-361-5p	hsa-mir-361-5p	mature	0.47	Y	85158685	85158706	TTATCAGAATCTCCAGGGGTAC	11808	GGAGCTTATCAGAATCTCCAGGGGTACTTTATAATTTCAAAAAGTCCCCCAGGTGTGATTCTGATTTGCTTC
hsa-mir-3611	chr10	-	35368525	35368607	hsa-mir-3611	hsa-mir-3611_+1_3	mature	0.34		35368535	35368556	TTGTGAAGAAAGAAATTCTTAC	116	AGCAGGTCTAATAAGAATTTCTTTTTCTTCACAATTATGAAAGAAAAGAAATTGTGAAGAAAGAAATTCTTACTAGTTTTGCT
hsa-mir-3611	chr10	-	35368525	35368607	hsa-mir-3611	hsa-mir-3611	mature	0.19	Y	35368536	35368556	TTGTGAAGAAAGAAATTCTTA	64	AGCAGGTCTAATAAGAATTTCTTTTTCTTCACAATTATGAAAGAAAAGAAATTGTGAAGAAAGAAATTCTTACTAGTTTTGCT
hsa-mir-3611	chr10	-	35368525	35368607	hsa-mir-3611	hsa-mir-3611_-1_3	mature	0.12		35368537	35368556	TTGTGAAGAAAGAAATTCTT	41	AGCAGGTCTAATAAGAATTTCTTTTTCTTCACAATTATGAAAGAAAAGAAATTGTGAAGAAAGAAATTCTTACTAGTTTTGCT
hsa-mir-3613	chr13	-	50570550	50570636	hsa-mir-3613-3p	hsa-mir-3613-3p_-2_3	mature	0.19		50570563	50570584	ACAAAAAAAAAAGCCCAACCCT	919	TGGTTGGGTTTGGATTGTTGTACTTTTTTTTTTGTTCGTTGCATTTTTAGGAACAAAAAAAAAAGCCCAACCCTTCACACCACTTCA
hsa-mir-3613	chr13	-	50570550	50570636	hsa-mir-3613-5p	hsa-mir-3613-5p	mature	0.53	Y	50570600	50570621	TGTTGTACTTTTTTTTTTGTTC	2459	TGGTTGGGTTTGGATTGTTGTACTTTTTTTTTTGTTCGTTGCATTTTTAGGAACAAAAAAAAAAGCCCAACCCTTCACACCACTTCA
hsa-mir-3613	chr13	-	50570550	50570636	hsa-mir-3613-5p	hsa-mir-3613-5p_-1_3	mature	0.13		50570601	50570621	TGTTGTACTTTTTTTTTTGTT	602	TGGTTGGGTTTGGATTGTTGTACTTTTTTTTTTGTTCGTTGCATTTTTAGGAACAAAAAAAAAAGCCCAACCCTTCACACCACTTCA
hsa-mir-3615	chr17	+	72744751	72744837	hsa-mir-3615	hsa-mir-3615	mature	0.11	Y	72744801	72744821	TCTCTCGGCTCCTCGCGGCTC	30	GACTCTGGGACGCTCAGACGCCGCGCGGGGCGGGGATTGGTCTGTGGTCCTCTCTCGGCTCCTCGCGGCTCGCGGCGGCCGACGGTT
hsa-mir-3615	chr17	+	72744751	72744837	hsa-mir-3615	hsa-mir-3615_+1_3	mature	0.27		72744801	72744822	TCTCTCGGCTCCTCGCGGCTCG	72	GACTCTGGGACGCTCAGACGCCGCGCGGGGCGGGGATTGGTCTGTGGTCCTCTCTCGGCTCCTCGCGGCTCGCGGCGGCCGACGGTT
hsa-mir-3615	chr17	+	72744751	72744837	hsa-mir-3615	hsa-mir-3615_+2_3	mature	0.42		72744801	72744823	TCTCTCGGCTCCTCGCGGCTCGC	110	GACTCTGGGACGCTCAGACGCCGCGCGGGGCGGGGATTGGTCTGTGGTCCTCTCTCGGCTCCTCGCGGCTCGCGGCGGCCGACGGTT
hsa-mir-3616	chr20	+	45795608	45795699	hsa-mir-3616-5p	hsa-mir-3616-5p_+1_3_-1_5	mature	0.62		45795627	45795648	TGAAGTGCACTCATGATATGTT	5	TGTCACTCCGCCAGCATCATGAAGTGCACTCATGATATGTTTGCCCCATCAGCGTGTCACGAGGGCATTTCATGATGCAGGCGGGGTTGGCA
hsa-mir-3616	chr20	+	45795608	45795699	hsa-mir-3616-3p	hsa-mir-3616-3p_-2_3	mature	0.25		45795667	45795687	CGAGGGCATTTCATGATGCAG	2	TGTCACTCCGCCAGCATCATGAAGTGCACTCATGATATGTTTGCCCCATCAGCGTGTCACGAGGGCATTTCATGATGCAGGCGGGGTTGGCA
hsa-mir-3618	chr22	+	20073268	20073355	hsa-mir-3618-star	hsa-mir-3618-star_-1_3_+1_5	star	0.37		20073284	20073305	TGATTTCCAATAATTGAGGCAG	3	TAAGCTGAGTGCATTGTGATTTCCAATAATTGAGGCAGTGGTTCTAAAAGCTGTCTACATTAATGAAAAGAGCAATGTGGCCAGCTTG
hsa-mir-362	chrX	+	49773571	49773635	hsa-mir-362-5p	hsa-mir-362-5p	mature	0.11	Y	49773575	49773598	AATCCTTGGAACCTAGGTGTGAGT	877	CTTGAATCCTTGGAACCTAGGTGTGAGTGCTATTTCAGTGCAACACACCTATTCAAGGATTCAAA
hsa-mir-362	chrX	+	49773571	49773635	hsa-mir-362-3p	hsa-mir-362-3p_-2_3	mature	0.11		49773612	49773631	AACACACCTATTCAAGGATT	869	CTTGAATCCTTGGAACCTAGGTGTGAGTGCTATTTCAGTGCAACACACCTATTCAAGGATTCAAA
hsa-mir-362	chrX	+	49773571	49773635	hsa-mir-362-3p	hsa-mir-362-3p_-1_3	mature	0.36		49773612	49773632	AACACACCTATTCAAGGATTC	2726	CTTGAATCCTTGGAACCTAGGTGTGAGTGCTATTTCAGTGCAACACACCTATTCAAGGATTCAAA
hsa-mir-362	chrX	+	49773571	49773635	hsa-mir-362-3p	hsa-mir-362-3p	mature	0.2	Y	49773612	49773633	AACACACCTATTCAAGGATTCA	1560	CTTGAATCCTTGGAACCTAGGTGTGAGTGCTATTTCAGTGCAACACACCTATTCAAGGATTCAAA
hsa-mir-3647	chr16	+	70563401	70563501	hsa-mir-3647	hsa-mir-3647_other1	other	0.13		70563453	70563484	AATTCTTGAAGAAAATTTTTGTGTGTCTGATC	13	TTGCTTTCATCAGCCTGAAGTGATGATTCACATTCATGTCTCTTCTCTGATAAATTCTTGAAGAAAATTTTTGTGTGTCTGATCAGGCCTCTAGAGGGCAG
hsa-mir-3647	chr16	+	70563401	70563501	hsa-mir-3647-5p-star	hsa-mir-3647-5p-star_-1_3	star	0.1		70563469	70563487	TTTTGTGTGTCTGATCAGG	10	TTGCTTTCATCAGCCTGAAGTGATGATTCACATTCATGTCTCTTCTCTGATAAATTCTTGAAGAAAATTTTTGTGTGTCTGATCAGGCCTCTAGAGGGCAG
hsa-mir-3647	chr16	+	70563401	70563501	hsa-mir-3647	hsa-mir-3647_other2	other	0.16		70563472	70563487	TGTGTGTCTGATCAGG	16	TTGCTTTCATCAGCCTGAAGTGATGATTCACATTCATGTCTCTTCTCTGATAAATTCTTGAAGAAAATTTTTGTGTGTCTGATCAGGCCTCTAGAGGGCAG
hsa-mir-3647	chr16	+	70563401	70563501	hsa-mir-3647	hsa-mir-3647_other3	other	0.16		70563473	70563487	GTGTGTCTGATCAGG	16	TTGCTTTCATCAGCCTGAAGTGATGATTCACATTCATGTCTCTTCTCTGATAAATTCTTGAAGAAAATTTTTGTGTGTCTGATCAGGCCTCTAGAGGGCAG
hsa-mir-365-1	chr16	+	14403141	14403227	hsa-mir-365-1	hsa-mir-365-1	mature	0.78	Y	14403196	14403217	TAATGCCCCTAAAAATCCTTAT	230387	ACCGCAGGGAAAATGAGGGACTTTTGGGGGCAGATGTGTTTCCATTCCACTATCATAATGCCCCTAAAAATCCTTATTGCTCTTGCA
hsa-mir-365-2	chr17	+	29902429	29902539	hsa-mir-365-2*	hsa-mir-365-2*	mature	0	Y	29902457	29902478	AGGGACTTTCAGGGGCAGCTGT	3	AGAGTGTTCAAGGACAGCAAGAAAAATGAGGGACTTTCAGGGGCAGCTGTGTTTTCTGACTCAGTCATAATGCCCCTAAAAATCCTTATTGTTCTTGCAGTGTGCATCGGG
hsa-mir-365-2	chr17	+	29902429	29902539	hsa-mir-365-2	hsa-mir-365-2	mature	0.78	Y	29902496	29902517	TAATGCCCCTAAAAATCCTTAT	230387	AGAGTGTTCAAGGACAGCAAGAAAAATGAGGGACTTTCAGGGGCAGCTGTGTTTTCTGACTCAGTCATAATGCCCCTAAAAATCCTTATTGTTCTTGCAGTGTGCATCGGG
hsa-mir-3653	chr22	-	29729146	29729255	hsa-mir-3653	hsa-mir-3653_other1	other	0.12		29729184	29729205	GCTCATGATGAGCAAACTGAGC	9	TCCCTGGGGACCCCTGGCAGCCCCTCCTGATGATTCTTCTTCCTGAGCACGCTCATGATGAGCAAACTGAGCCTCTAAGAAGTTGACTGAAGGGGCTGCTTCCCCAAGGA
hsa-mir-3653	chr22	-	29729146	29729255	hsa-mir-3653	hsa-mir-3653_other2	other	0.12		29729184	29729206	CGCTCATGATGAGCAAACTGAGC	9	TCCCTGGGGACCCCTGGCAGCCCCTCCTGATGATTCTTCTTCCTGAGCACGCTCATGATGAGCAAACTGAGCCTCTAAGAAGTTGACTGAAGGGGCTGCTTCCCCAAGGA
hsa-mir-3653	chr22	-	29729146	29729255	hsa-mir-3653	hsa-mir-3653_other3	other	0.46		29729208	29729233	CCTCCTGATGATTCTTCTTCCTGAGC	34	TCCCTGGGGACCCCTGGCAGCCCCTCCTGATGATTCTTCTTCCTGAGCACGCTCATGATGAGCAAACTGAGCCTCTAAGAAGTTGACTGAAGGGGCTGCTTCCCCAAGGA
hsa-mir-3657	chr12	-	112475402	112475518	hsa-mir-3657	hsa-mir-3657_+1_3	mature	0.42		112475429	112475450	TGTGTCCCATTATTGGTGATTT	54	TGTGTCCCATAATTAAATAATGAAATCTGAAATCACCAATAATGGGACACTAATGTGATTAATGTTGTTGTGTCCCATTATTGGTGATTTCAGATTTCATATATGATTAAGGACATA
hsa-mir-3657	chr12	-	112475402	112475518	hsa-mir-3657	hsa-mir-3657	mature	0.09	Y	112475430	112475450	TGTGTCCCATTATTGGTGATT	12	TGTGTCCCATAATTAAATAATGAAATCTGAAATCACCAATAATGGGACACTAATGTGATTAATGTTGTTGTGTCCCATTATTGGTGATTTCAGATTTCATATATGATTAAGGACATA
hsa-mir-3657	chr12	-	112475402	112475518	hsa-mir-3657-star	hsa-mir-3657-star_+1_5	star	0.12		112475466	112475487	ATCACCAATAATGGGACACTAA	16	TGTGTCCCATAATTAAATAATGAAATCTGAAATCACCAATAATGGGACACTAATGTGATTAATGTTGTTGTGTCCCATTATTGGTGATTTCAGATTTCATATATGATTAAGGACATA
hsa-mir-3657	chr12	-	112475402	112475518	hsa-mir-3657-star	hsa-mir-3657-star_-1_3_+1_5	star	0.1		112475467	112475487	ATCACCAATAATGGGACACTA	13	TGTGTCCCATAATTAAATAATGAAATCTGAAATCACCAATAATGGGACACTAATGTGATTAATGTTGTTGTGTCCCATTATTGGTGATTTCAGATTTCATATATGATTAAGGACATA
hsa-mir-3659	chr1	+	38554902	38555000	hsa-mir-3659	hsa-mir-3659_-1_3	mature	0.1		38554960	38554979	TGAGTGTTGTCTACGAGGGC	9	TCTACAAGCAGATACAAGGATGCCCTTGTACACAACACACGTGCTGCTTGTATAGACATGAGTGTTGTCTACGAGGGCATCCTTGTGTCTGTGTGTGTG
hsa-mir-3659	chr1	+	38554902	38555000	hsa-mir-3659	hsa-mir-3659	mature	0.18	Y	38554960	38554980	TGAGTGTTGTCTACGAGGGCA	15	TCTACAAGCAGATACAAGGATGCCCTTGTACACAACACACGTGCTGCTTGTATAGACATGAGTGTTGTCTACGAGGGCATCCTTGTGTCTGTGTGTGTG
hsa-mir-3659	chr1	+	38554902	38555000	hsa-mir-3659	hsa-mir-3659_+1_3	mature	0.62		38554960	38554981	TGAGTGTTGTCTACGAGGGCAT	51	TCTACAAGCAGATACAAGGATGCCCTTGTACACAACACACGTGCTGCTTGTATAGACATGAGTGTTGTCTACGAGGGCATCCTTGTGTCTGTGTGTGTG
hsa-mir-3662	chr6	-	135300475	135300569	hsa-mir-3662	hsa-mir-3662	mature	0.4	Y	135300492	135300515	GAAAATGATGAGTAGTGACTGATG	2	TGTGTTTTCCTCAACGCTCACAGTTACACTTCTTACTCTCAATCCATTCATATTGAAAATGATGAGTAGTGACTGATGAAGCACAAATCAGCCAA
hsa-mir-3662	chr6	-	135300475	135300569	hsa-mir-3662	hsa-mir-3662_+1_5	mature	0.6		135300492	135300516	TGAAAATGATGAGTAGTGACTGATG	3	TGTGTTTTCCTCAACGCTCACAGTTACACTTCTTACTCTCAATCCATTCATATTGAAAATGATGAGTAGTGACTGATGAAGCACAAATCAGCCAA
hsa-mir-3676	chr17	+	8090492	8090576	hsa-mir-3676	hsa-mir-3676_other1	other	0.39		8090505	8090531	CTGTCTAGTAAACAGGAGATCCTGGGT	570	TTGGTTAAAGCGCCTGTCTAGTAAACAGGAGATCCTGGGTTCGAATCCCAGCGGTGCCTCCGTGTTTCCCCCACGCTTTTGCCAA
hsa-mir-3676	chr17	+	8090492	8090576	hsa-mir-3676	hsa-mir-3676	mature	0.15	Y	8090551	8090570	CCGTGTTTCCCCCACGCTTT	225	TTGGTTAAAGCGCCTGTCTAGTAAACAGGAGATCCTGGGTTCGAATCCCAGCGGTGCCTCCGTGTTTCCCCCACGCTTTTGCCAA
hsa-mir-3677	chr16	+	2320713	2320772	hsa-mir-3677-star	hsa-mir-3677-star_-1_3	star	0.2		2320715	2320735	CAGTGGCCAGAGCCCTGCAGT	1	GGCAGTGGCCAGAGCCCTGCAGTGCTGGGCATGGGCTTCTCGTGGGCTCTGGCCACGGCC
hsa-mir-3677	chr16	+	2320713	2320772	hsa-mir-3677	hsa-mir-3677	mature	0.8	Y	2320751	2320772	CTCGTGGGCTCTGGCCACGGCC	4	GGCAGTGGCCAGAGCCCTGCAGTGCTGGGCATGGGCTTCTCGTGGGCTCTGGCCACGGCC
hsa-mir-3679	chr2	+	134884695	134884762	hsa-mir-3679-3p	hsa-mir-3679-3p_-1_3	mature	0.38		134884738	134884758	CTTCCCCCCAGTAATCTTCAT	5	CGTGGTGAGGATATGGCAGGGAAGGGGAGTTTCCCTCTATTCCCTTCCCCCCAGTAATCTTCATCATG
hsa-mir-3679	chr2	+	134884695	134884762	hsa-mir-3679-3p	hsa-mir-3679-3p	mature	0.38	Y	134884738	134884759	CTTCCCCCCAGTAATCTTCATC	5	CGTGGTGAGGATATGGCAGGGAAGGGGAGTTTCCCTCTATTCCCTTCCCCCCAGTAATCTTCATCATG
hsa-mir-3679	chr2	+	134884695	134884762	hsa-mir-3679-3p	hsa-mir-3679-3p_-1_5	mature	0.23		134884739	134884759	TTCCCCCCAGTAATCTTCATC	3	CGTGGTGAGGATATGGCAGGGAAGGGGAGTTTCCCTCTATTCCCTTCCCCCCAGTAATCTTCATCATG
hsa-mir-3680	chr16	-	21517369	21517455	hsa-mir-3680*-star	hsa-mir-3680*-star_-2_3_+1_5	star	0.48		21517418	21517439	TCACTCACAGGATTGTGCAAAT	20	AAATTTAAGGAGGGACTCACTCACAGGATTGTGCAAATGCAAAGTTGGCTTTTGCATGACCCTGGGAGTAGGTGCCTCCTTAAATTT
hsa-mir-3680	chr16	-	21517369	21517455	hsa-mir-3680	hsa-mir-3680	mature	0.02	Y	21517421	21517442	GACTCACTCACAGGATTGTGCA	1	AAATTTAAGGAGGGACTCACTCACAGGATTGTGCAAATGCAAAGTTGGCTTTTGCATGACCCTGGGAGTAGGTGCCTCCTTAAATTT
hsa-mir-3681	chr2	+	12339255	12339326	hsa-mir-3681	hsa-mir-3681	mature	0.72	Y	12339263	12339284	TAGTGGATGATGCACTCTGTGC	13	ACTTCCAGTAGTGGATGATGCACTCTGTGCAGGGCCAACTGTGCACACAGTGCTTCATCCACTACTGGAAGT
hsa-mir-3681	chr2	+	12339255	12339326	hsa-mir-3681	hsa-mir-3681_+1_3	mature	0.22		12339263	12339285	TAGTGGATGATGCACTCTGTGCA	4	ACTTCCAGTAGTGGATGATGCACTCTGTGCAGGGCCAACTGTGCACACAGTGCTTCATCCACTACTGGAAGT
hsa-mir-3682	chr2	-	54076258	54076341	hsa-mir-3682-star	hsa-mir-3682-star_-1_3_+2_5	star	0.8		54076306	54076327	CTACTTCTACCTGTGTTATCAT	8	TAAGTTATATATGTCTACTTCTACCTGTGTTATCATAATAAAGGTGTCATGATGATACAGGTGGAGGTAGAAATATATAACTTA
hsa-mir-3684	chr4	+	99918537	99918610	hsa-mir-3684	hsa-mir-3684_other1	other	0.1		99918582	99918602	TGTTAGACCTAGTACACGTCC	8	AATCTAAAGGACCTGTACTAGGTTTAACATGTTGAGCATTACTCATGTTAGACCTAGTACACGTCCTTTAGATT
hsa-mir-3684	chr4	+	99918537	99918610	hsa-mir-3684	hsa-mir-3684_-1_3_+2_5	mature	0.32		99918582	99918603	TGTTAGACCTAGTACACGTCCT	25	AATCTAAAGGACCTGTACTAGGTTTAACATGTTGAGCATTACTCATGTTAGACCTAGTACACGTCCTTTAGATT
hsa-mir-3684	chr4	+	99918537	99918610	hsa-mir-3684	hsa-mir-3684	mature	0.41	Y	99918584	99918604	TTAGACCTAGTACACGTCCTT	32	AATCTAAAGGACCTGTACTAGGTTTAACATGTTGAGCATTACTCATGTTAGACCTAGTACACGTCCTTTAGATT
hsa-mir-3688	chr4	-	160049953	160050045	hsa-mir-3688	hsa-mir-3688	mature	0.45	Y	160049965	160049986	TATGGAAAGACTTTGCCACTCT	44	TCTTCACTTTCAAGAGTGGCAAAGTCTTTCCATATGTATGTATGTATGTCTGTTACACATATGGAAAGACTTTGCCACTCTTTAAAGTGAAGA
hsa-mir-3688	chr4	-	160049953	160050045	hsa-mir-3688	hsa-mir-3688_-1_3	mature	0.12		160049966	160049986	TATGGAAAGACTTTGCCACTC	12	TCTTCACTTTCAAGAGTGGCAAAGTCTTTCCATATGTATGTATGTATGTCTGTTACACATATGGAAAGACTTTGCCACTCTTTAAAGTGAAGA
hsa-mir-3689a	chr9	-	137741332	137741409	hsa-mir-3689a-5p	hsa-mir-3689a-5p	mature	1	Y	137741379	137741400	TGTGATATCATGGTTCCTGGGA	8	CCTGGGAGGTGTGATATCATGGTTCCTGGGAGGTGTGATCCTGTGCTTCCTGGGAGGTGTGATATCGTGGTTCCTGGG
hsa-mir-3689b	chr9	-	137741970	137742117	hsa-mir-3689b	hsa-mir-3689b	mature	1	Y	137742051	137742072	TGTGATATCATGGTTCCTGGGA	8	GATCCTGTGCTCCCTGGGGGGTCTGATCCTGTGCTTCCTGGGAGGTGTGATATCATGGTTCCTGGGAGGTGTGATCCCGTGCTTCCTGGGAGGTGTGATATTGTGGTTCCTGGGAGGTGTGATCCCGTGCTCCCTGGGAGGTGTGATC
hsa-mir-369	chr14	+	101531934	101532003	hsa-mir-369-3p	hsa-mir-369-3p	mature	0.91	Y	101531977	101531997	AATAATACATGGTTGATCTTT	42	TTGAAGGGAGATCGACCGTGTTATATTCGCTTTATTGACTTCGAATAATACATGGTTGATCTTTTCTCAG
hsa-mir-3691	chr6	-	5148466	5148555	hsa-mir-3691	hsa-mir-3691_+1_3_-2_5	mature	0.1		5148518	5148539	TGGATGATGGAGACTCGGTACC	3	TTGAGGCACTGGGTAGTGGATGATGGAGACTCGGTACCCACTGCTGAGGGTGGGGACCAAGTCTGCGTCATCCTCTCCTCAGTGCCTCAA
hsa-mir-3691	chr6	-	5148466	5148555	hsa-mir-3691	hsa-mir-3691_+1_3_-1_5	mature	0.16		5148518	5148540	GTGGATGATGGAGACTCGGTACC	5	TTGAGGCACTGGGTAGTGGATGATGGAGACTCGGTACCCACTGCTGAGGGTGGGGACCAAGTCTGCGTCATCCTCTCCTCAGTGCCTCAA
hsa-mir-3691	chr6	-	5148466	5148555	hsa-mir-3691	hsa-mir-3691_+1_3	mature	0.1		5148518	5148541	AGTGGATGATGGAGACTCGGTACC	3	TTGAGGCACTGGGTAGTGGATGATGGAGACTCGGTACCCACTGCTGAGGGTGGGGACCAAGTCTGCGTCATCCTCTCCTCAGTGCCTCAA
hsa-mir-3691	chr6	-	5148466	5148555	hsa-mir-3691	hsa-mir-3691_-1_5	mature	0.13		5148519	5148540	GTGGATGATGGAGACTCGGTAC	4	TTGAGGCACTGGGTAGTGGATGATGGAGACTCGGTACCCACTGCTGAGGGTGGGGACCAAGTCTGCGTCATCCTCTCCTCAGTGCCTCAA
hsa-mir-3691	chr6	-	5148466	5148555	hsa-mir-3691	hsa-mir-3691	mature	0.06	Y	5148519	5148541	AGTGGATGATGGAGACTCGGTAC	2	TTGAGGCACTGGGTAGTGGATGATGGAGACTCGGTACCCACTGCTGAGGGTGGGGACCAAGTCTGCGTCATCCTCTCCTCAGTGCCTCAA
hsa-mir-3691	chr6	-	5148466	5148555	hsa-mir-3691	hsa-mir-3691_-1_3	mature	0.1		5148520	5148541	AGTGGATGATGGAGACTCGGTA	3	TTGAGGCACTGGGTAGTGGATGATGGAGACTCGGTACCCACTGCTGAGGGTGGGGACCAAGTCTGCGTCATCCTCTCCTCAGTGCCTCAA
hsa-mir-3691	chr6	-	5148466	5148555	hsa-mir-3691	hsa-mir-3691_-2_3_+1_5	mature	0.1		5148521	5148542	TAGTGGATGATGGAGACTCGGT	3	TTGAGGCACTGGGTAGTGGATGATGGAGACTCGGTACCCACTGCTGAGGGTGGGGACCAAGTCTGCGTCATCCTCTCCTCAGTGCCTCAA
hsa-mir-374a	chrX	-	73507120	73507191	hsa-mir-374a*	hsa-mir-374a*	mature	0.03	Y	73507129	73507150	CTTATCAGATTGTATTGTAATT	3035	TACATCGGCCATTATAATACAACCTGATAAGTGTTATAGCACTTATCAGATTGTATTGTAATTGTCTGTGTA
hsa-mir-374a	chrX	-	73507120	73507191	hsa-mir-374a	hsa-mir-374a	mature	0.34	Y	73507159	73507180	TTATAATACAACCTGATAAGTG	29644	TACATCGGCCATTATAATACAACCTGATAAGTGTTATAGCACTTATCAGATTGTATTGTAATTGTCTGTGTA
hsa-mir-374a	chrX	-	73507120	73507191	hsa-mir-374a	hsa-mir-374a_-1_3	mature	0.41		73507160	73507180	TTATAATACAACCTGATAAGT	35437	TACATCGGCCATTATAATACAACCTGATAAGTGTTATAGCACTTATCAGATTGTATTGTAATTGTCTGTGTA
hsa-mir-374a	chrX	-	73507120	73507191	hsa-mir-374a	hsa-mir-374a_-2_3	mature	0.11		73507161	73507180	TTATAATACAACCTGATAAG	9734	TACATCGGCCATTATAATACAACCTGATAAGTGTTATAGCACTTATCAGATTGTATTGTAATTGTCTGTGTA
hsa-mir-374b	chrX	-	73438381	73438452	hsa-mir-374b*	hsa-mir-374b*	mature	0	Y	73438391	73438412	CTTAGCAGGTTGTATTATCATT	322	ACTCGGATGGATATAATACAACCTGCTAAGTGTCCTAGCACTTAGCAGGTTGTATTATCATTGTCCGTGTCT
hsa-mir-374b	chrX	-	73438381	73438452	hsa-mir-374b	hsa-mir-374b_+1_3	mature	0.1		73438420	73438442	ATATAATACAACCTGCTAAGTGT	4221	ACTCGGATGGATATAATACAACCTGCTAAGTGTCCTAGCACTTAGCAGGTTGTATTATCATTGTCCGTGTCT
hsa-mir-374b	chrX	-	73438381	73438452	hsa-mir-374b	hsa-mir-374b	mature	0.41	Y	73438421	73438442	ATATAATACAACCTGCTAAGTG	17311	ACTCGGATGGATATAATACAACCTGCTAAGTGTCCTAGCACTTAGCAGGTTGTATTATCATTGTCCGTGTCT
hsa-mir-374b	chrX	-	73438381	73438452	hsa-mir-374b	hsa-mir-374b_-1_3	mature	0.37		73438422	73438442	ATATAATACAACCTGCTAAGT	15833	ACTCGGATGGATATAATACAACCTGCTAAGTGTCCTAGCACTTAGCAGGTTGTATTATCATTGTCCGTGTCT
hsa-mir-374c	chrX	+	73438383	73438452	hsa-mir-374c	hsa-mir-374c_-3_3	mature	0.14		73438395	73438413	ATAATACAACCTGCTAAGT	20	ACACGGACAATGATAATACAACCTGCTAAGTGCTAGGACACTTAGCAGGTTGTATTATATCCATCCGAGT
hsa-mir-374c	chrX	+	73438383	73438452	hsa-mir-374c	hsa-mir-374c_-2_3	mature	0.29		73438395	73438414	ATAATACAACCTGCTAAGTG	40	ACACGGACAATGATAATACAACCTGCTAAGTGCTAGGACACTTAGCAGGTTGTATTATATCCATCCGAGT
hsa-mir-375	chr2	-	219866366	219866429	hsa-mir-375	hsa-mir-375	mature	0.92	Y	219866369	219866390	TTTGTTCGTTCGGCTCGCGTGA	50	CCCCGCGACGAGCCCCTCGCACAAACCGGACCTGAGCGTTTTGTTCGTTCGGCTCGCGTGAGGC
hsa-mir-376a-1	chr14	+	101507118	101507185	hsa-mir-376a-1	hsa-mir-376a-1_Edit_5	matureEdit	0.37	Y	101507161	101507181	ATCATGGAGGAAAATCCACGT	13	TAAAAGGTAGATTCTCCTTCTATGAGTACATTATTTATGATTAATCATAGAGGAAAATCCACGTTTTC
hsa-mir-376a-1	chr14	+	101507118	101507185	hsa-mir-376a-1	hsa-mir-376a-1	mature	0.45	Y	101507161	101507181	ATCATAGAGGAAAATCCACGT	16	TAAAAGGTAGATTCTCCTTCTATGAGTACATTATTTATGATTAATCATAGAGGAAAATCCACGTTTTC
hsa-mir-376a-1	chr14	+	101507118	101507185	hsa-mir-376a-1	hsa-mir-376a-1_-3_5	mature	0.11		101507164	101507181	ATAGAGGAAAATCCACGT	4	TAAAAGGTAGATTCTCCTTCTATGAGTACATTATTTATGATTAATCATAGAGGAAAATCCACGTTTTC
hsa-mir-376a-2	chr14	+	101506405	101506484	hsa-mir-376a-2	hsa-mir-376a-2_Edit_5	matureEdit	0.37	Y	101506454	101506474	ATCATGGAGGAAAATCCACGT	13	GGTATTTAAAAGGTAGATTTTCCTTCTATGGTTACGTGTTTGATGGTTAATCATAGAGGAAAATCCACGTTTTCAGTATC
hsa-mir-376a-2	chr14	+	101506405	101506484	hsa-mir-376a-2	hsa-mir-376a-2	mature	0.45	Y	101506454	101506474	ATCATAGAGGAAAATCCACGT	16	GGTATTTAAAAGGTAGATTTTCCTTCTATGGTTACGTGTTTGATGGTTAATCATAGAGGAAAATCCACGTTTTCAGTATC
hsa-mir-376a-2	chr14	+	101506405	101506484	hsa-mir-376a-2	hsa-mir-376a-2_-3_5	mature	0.11		101506457	101506474	ATAGAGGAAAATCCACGT	4	GGTATTTAAAAGGTAGATTTTCCTTCTATGGTTACGTGTTTGATGGTTAATCATAGAGGAAAATCCACGTTTTCAGTATC
hsa-mir-376b	chr14	+	101506772	101506871	hsa-mir-376b	hsa-mir-376b_-1_3	mature	0.9		101506833	101506853	ATCATAGAGGAAAATCCATGT	10	CAGTCCTTCTTTGGTATTTAAAACGTGGATATTCCTTCTATGTTTACGTGATTCCTGGTTAATCATAGAGGAAAATCCATGTTTTCAGTATCAAATGCTG
hsa-mir-376c	chr14	+	101506026	101506091	hsa-mir-376c	hsa-mir-376c	mature	0.82	Y	101506068	101506088	AACATAGAGGAAATTCCACGT	29	AAAAGGTGGATATTCCTTCTATGTTTATGTTATTTATGGTTAAACATAGAGGAAATTCCACGTTTT
hsa-mir-376c	chr14	+	101506026	101506091	hsa-mir-376c	hsa-mir-376c_+1_3	mature	0.14		101506068	101506089	AACATAGAGGAAATTCCACGTT	5	AAAAGGTGGATATTCCTTCTATGTTTATGTTATTTATGGTTAAACATAGAGGAAATTCCACGTTTT
hsa-mir-377	chr14	+	101528386	101528454	hsa-mir-377*	hsa-mir-377*	mature	0.16	Y	101528392	101528413	AGAGGTTGCCCTTGGTGAATTC	2	TTGAGCAGAGGTTGCCCTTGGTGAATTCGCTTTATTTATGTTGAATCACACAAAGGCAACTTTTGTTTG
hsa-mir-377	chr14	+	101528386	101528454	hsa-mir-377	hsa-mir-377_-2_3	mature	0.25		101528430	101528449	ATCACACAAAGGCAACTTTT	3	TTGAGCAGAGGTTGCCCTTGGTGAATTCGCTTTATTTATGTTGAATCACACAAAGGCAACTTTTGTTTG
hsa-mir-377	chr14	+	101528386	101528454	hsa-mir-377	hsa-mir-377	mature	0.5	Y	101528430	101528451	ATCACACAAAGGCAACTTTTGT	6	TTGAGCAGAGGTTGCCCTTGGTGAATTCGCTTTATTTATGTTGAATCACACAAAGGCAACTTTTGTTTG
hsa-mir-378	chr5	+	149112387	149112452	hsa-mir-378*	hsa-mir-378*	mature	0.02	Y	149112391	149112412	CTCCTGACTCCAGGTCCTGTGT	1806	AGGGCTCCTGACTCCAGGTCCTGTGTGTTACCTAGAAATAGCACTGGACTTGGAGTCAGAAGGCCT
hsa-mir-378	chr5	+	149112387	149112452	hsa-mir-378	hsa-mir-378	mature	0.11	Y	149112429	149112449	ACTGGACTTGGAGTCAGAAGG	8878	AGGGCTCCTGACTCCAGGTCCTGTGTGTTACCTAGAAATAGCACTGGACTTGGAGTCAGAAGGCCT
hsa-mir-378	chr5	+	149112387	149112452	hsa-mir-378	hsa-mir-378_+1_3	mature	0.48		149112429	149112450	ACTGGACTTGGAGTCAGAAGGC	38353	AGGGCTCCTGACTCCAGGTCCTGTGTGTTACCTAGAAATAGCACTGGACTTGGAGTCAGAAGGCCT
hsa-mir-378	chr5	+	149112387	149112452	hsa-mir-378	hsa-mir-378_+2_3	mature	0.15		149112429	149112451	ACTGGACTTGGAGTCAGAAGGCC	12443	AGGGCTCCTGACTCCAGGTCCTGTGTGTTACCTAGAAATAGCACTGGACTTGGAGTCAGAAGGCCT
hsa-mir-378c	chr10	-	132760850	132760930	hsa-mir-378c	hsa-mir-378c_other1	other	0.7		132760901	132760920	ACTGGACTTGGAGTCAGAAG	3577	GGAGGCCATCACTGGACTTGGAGTCAGAAGAGTGGAGTCGGGTCAGACTTCAACTCTGACTTTGAAGGTGGTGAGTGCCTC
hsa-mir-378c	chr10	-	132760850	132760930	hsa-mir-378c	hsa-mir-378c_other2	other	0.11		132760903	132760920	ACTGGACTTGGAGTCAGA	565	GGAGGCCATCACTGGACTTGGAGTCAGAAGAGTGGAGTCGGGTCAGACTTCAACTCTGACTTTGAAGGTGGTGAGTGCCTC
hsa-mir-379	chr14	+	101488402	101488468	hsa-mir-379	hsa-mir-379_-1_3	mature	0.33		101488407	101488426	TGGTAGACTATGGAACGTAG	2	AGAGATGGTAGACTATGGAACGTAGGCGTTATGATTTCTGACCTATGTAACATGGTCCACTAACTCT
hsa-mir-379	chr14	+	101488402	101488468	hsa-mir-379	hsa-mir-379	mature	0.16	Y	101488407	101488427	TGGTAGACTATGGAACGTAGG	1	AGAGATGGTAGACTATGGAACGTAGGCGTTATGATTTCTGACCTATGTAACATGGTCCACTAACTCT
hsa-mir-379	chr14	+	101488402	101488468	hsa-mir-379*	hsa-mir-379*_-2_3	mature	0.33		101488445	101488464	TATGTAACATGGTCCACTAA	2	AGAGATGGTAGACTATGGAACGTAGGCGTTATGATTTCTGACCTATGTAACATGGTCCACTAACTCT
hsa-mir-379	chr14	+	101488402	101488468	hsa-mir-379*	hsa-mir-379*_-1_3	mature	0.16		101488445	101488465	TATGTAACATGGTCCACTAAC	1	AGAGATGGTAGACTATGGAACGTAGGCGTTATGATTTCTGACCTATGTAACATGGTCCACTAACTCT
hsa-mir-381	chr14	+	101512256	101512330	hsa-mir-381	hsa-mir-381_-1_3	mature	0.2		101512304	101512324	TATACAAGGGCAAGCTCTCTG	1	TACTTAAAGCGAGGTTGCCCTTTGTATATTCGGTTTATTGACATGGAATATACAAGGGCAAGCTCTCTGTGAGTA
hsa-mir-381	chr14	+	101512256	101512330	hsa-mir-381	hsa-mir-381	mature	0.8	Y	101512304	101512325	TATACAAGGGCAAGCTCTCTGT	4	TACTTAAAGCGAGGTTGCCCTTTGTATATTCGGTTTATTGACATGGAATATACAAGGGCAAGCTCTCTGTGAGTA
hsa-mir-382	chr14	+	101520642	101520717	hsa-mir-382-star	hsa-mir-382-star_-1_3	star	0.42		101520688	101520709	AATCATTCACGGACAACACTTT	3	TACTTGAAGAGAAGTTGTTCGTGGTGGATTCGCTTTACTTATGACGAATCATTCACGGACAACACTTTTTTCAGTA
hsa-mir-382	chr14	+	101520642	101520717	hsa-mir-382-star	hsa-mir-382-star	star	0.14		101520688	101520710	AATCATTCACGGACAACACTTTT	1	TACTTGAAGAGAAGTTGTTCGTGGTGGATTCGCTTTACTTATGACGAATCATTCACGGACAACACTTTTTTCAGTA
hsa-mir-3909	chr22	+	35731632	35731750	hsa-mir-3909	hsa-mir-3909_-1_3	mature	0.17		35731702	35731722	TGTCCTCTAGGGCCTGCAGTC	13	GGTATGCTGTTGCGCTGTCCTTCCTCTGGGGAGCAGGCTCCGGGGGACAGGGAAAAGCACACAAGGAACTTGTCCTCTAGGGCCTGCAGTCTCATGGGAGAGTGACATGCACCAGGACC
hsa-mir-3909	chr22	+	35731632	35731750	hsa-mir-3909	hsa-mir-3909	mature	0.68	Y	35731702	35731723	TGTCCTCTAGGGCCTGCAGTCT	52	GGTATGCTGTTGCGCTGTCCTTCCTCTGGGGAGCAGGCTCCGGGGGACAGGGAAAAGCACACAAGGAACTTGTCCTCTAGGGCCTGCAGTCTCATGGGAGAGTGACATGCACCAGGACC
hsa-mir-3912	chr5	-	170813659	170813763	hsa-mir-3912	hsa-mir-3912_other1	other	0.12		170813678	170813699	ACGCATAATATGGACATGTTAT	11	AGAGAGGAATGAACAGTTAAATTATAACATGTCCATATTATGGGTTAGTTGTGGACACATACTAACGCATAATATGGACATGTTATAATTTAACTGTTCCTTTCT
hsa-mir-3912	chr5	-	170813659	170813763	hsa-mir-3912	hsa-mir-3912_+2_3	mature	0.15		170813679	170813701	TAACGCATAATATGGACATGTTA	13	AGAGAGGAATGAACAGTTAAATTATAACATGTCCATATTATGGGTTAGTTGTGGACACATACTAACGCATAATATGGACATGTTATAATTTAACTGTTCCTTTCT
hsa-mir-3912	chr5	-	170813659	170813763	hsa-mir-3912	hsa-mir-3912_+1_3	mature	0.19		170813680	170813701	TAACGCATAATATGGACATGTT	17	AGAGAGGAATGAACAGTTAAATTATAACATGTCCATATTATGGGTTAGTTGTGGACACATACTAACGCATAATATGGACATGTTATAATTTAACTGTTCCTTTCT
hsa-mir-3912	chr5	-	170813659	170813763	hsa-mir-3912	hsa-mir-3912	mature	0.1	Y	170813681	170813701	TAACGCATAATATGGACATGT	9	AGAGAGGAATGAACAGTTAAATTATAACATGTCCATATTATGGGTTAGTTGTGGACACATACTAACGCATAATATGGACATGTTATAATTTAACTGTTCCTTTCT
hsa-mir-3913-1	chr12	-	69978501	69978602	hsa-mir-3913-1	hsa-mir-3913-1	mature	0.13	Y	69978559	69978580	TTTGGGACTGATCTTGATGTCT	16	TTGTTTATAATAAACTGAAATATTTGGGACTGATCTTGATGTCTGCCAAAACCTTGGCAGACATCAAGATCAGTCCCAAATATTTCAGTTTATTATAGACAG
hsa-mir-3913-2	chr12	+	69978502	69978601	hsa-mir-3913-2	hsa-mir-3913-2	mature	0.13	Y	69978523	69978544	TTTGGGACTGATCTTGATGTCT	16	TGTCTATAATAAACTGAAATATTTGGGACTGATCTTGATGTCTGCCAAGGTTTTGGCAGACATCAAGATCAGTCCCAAATATTTCAGTTTATTATAAACA
hsa-mir-3916	chr1	-	247365268	247365361	hsa-mir-3916	hsa-mir-3916	mature	0.16	Y	247365317	247365342	AAGAGGAAGAAATGGCTGGTTCTCAG	1	ATCCCAGAGAAGAAGGAAGAAGAGGAAGAAATGGCTGGTTCTCAGGTGAATGTGTCTGGGTTCAGGGGATGTGTCTCCTCTTTTCTTCTGGGAT
hsa-mir-3922	chr12	+	104985410	104985493	hsa-mir-3922	hsa-mir-3922_-1_5	mature	0.16		104985472	104985492	CTGGCCTTGACTTGACTCTTT	1	GGAAGAGTCAAGTCAAGGCCAGAGGTCCCACAGCAGGGCTGGAAAGCACACCTGTGGGACTTCTGGCCTTGACTTGACTCTTTC
hsa-mir-3925	chr6	-	36590212	36590288	hsa-mir-3925-star	hsa-mir-3925-star_-1_3	star	0.45		36590222	36590242	ACTCCAGTTTTAGTTCTCTTG	9	GTGGGAATAGCAAGAGAACTGAAAGTGGAGCCTGTCACATCTCCAGACTCCAGTTTTAGTTCTCTTGCTATTTCCAC
hsa-mir-3925	chr6	-	36590212	36590288	hsa-mir-3925-star	hsa-mir-3925-star_-1_3_+1_5	star	0.2		36590222	36590243	GACTCCAGTTTTAGTTCTCTTG	4	GTGGGAATAGCAAGAGAACTGAAAGTGGAGCCTGTCACATCTCCAGACTCCAGTTTTAGTTCTCTTGCTATTTCCAC
hsa-mir-3925	chr6	-	36590212	36590288	hsa-mir-3925-star	hsa-mir-3925-star_-2_3	star	0.1		36590223	36590242	ACTCCAGTTTTAGTTCTCTT	2	GTGGGAATAGCAAGAGAACTGAAAGTGGAGCCTGTCACATCTCCAGACTCCAGTTTTAGTTCTCTTGCTATTTCCAC
hsa-mir-3925	chr6	-	36590212	36590288	hsa-mir-3925	hsa-mir-3925_+2_3_-1_5	mature	0.15		36590254	36590276	AGAGAACTGAAAGTGGAGCCTGT	3	GTGGGAATAGCAAGAGAACTGAAAGTGGAGCCTGTCACATCTCCAGACTCCAGTTTTAGTTCTCTTGCTATTTCCAC
hsa-mir-3928	chr22	-	31556047	31556104	hsa-mir-3928	hsa-mir-3928	mature	0.23	Y	31556047	31556068	GGAGGAACCTTGGAGCTTCGGC	29	GCTGAAGCTCTAAGGTTCCGCCTGCGGGCAGGAAGCGGAGGAACCTTGGAGCTTCGGC
hsa-mir-3928	chr22	-	31556047	31556104	hsa-mir-3928	hsa-mir-3928_-1_3	mature	0.16		31556048	31556068	GGAGGAACCTTGGAGCTTCGG	20	GCTGAAGCTCTAAGGTTCCGCCTGCGGGCAGGAAGCGGAGGAACCTTGGAGCTTCGGC
hsa-mir-3934	chr6	+	33665904	33666010	hsa-mir-3934	hsa-mir-3934	mature	0.54	Y	33665928	33665949	TCAGGTGTGGAAACTGAGGCAG	55	CACAGCCCTTCCTGTCCCCAGTTTTCAGGTGTGGAAACTGAGGCAGGAGGCAGTGAAGTAACTTGCTCAGGTTGCACAGCTGGGAAGTGGAGCAGGGATTTGAATCC
hsa-mir-3934	chr6	+	33665904	33666010	hsa-mir-3934	hsa-mir-3934_+1_3	mature	0.17		33665928	33665950	TCAGGTGTGGAAACTGAGGCAGG	18	CACAGCCCTTCCTGTCCCCAGTTTTCAGGTGTGGAAACTGAGGCAGGAGGCAGTGAAGTAACTTGCTCAGGTTGCACAGCTGGGAAGTGGAGCAGGGATTTGAATCC
hsa-mir-3938	chr3	-	55886519	55886621	hsa-mir-3938	hsa-mir-3938_+1_3	mature	0.11		55886541	55886563	AATTCCCTTGTAGATAACCCGGT	6	AGGAATTTTTAACCCGATCACTAGATTATCTACAAGGGAATTTTTTTTTAATTTAAAAAATTCCCTTGTAGATAACCCGGTGGTCAGGTTGGATGGCTCCATG
hsa-mir-3938	chr3	-	55886519	55886621	hsa-mir-3938	hsa-mir-3938	mature	0.64	Y	55886542	55886563	AATTCCCTTGTAGATAACCCGG	34	AGGAATTTTTAACCCGATCACTAGATTATCTACAAGGGAATTTTTTTTTAATTTAAAAAATTCCCTTGTAGATAACCCGGTGGTCAGGTTGGATGGCTCCATG
hsa-mir-3939	chr6	-	167411294	167411399	hsa-mir-3939	hsa-mir-3939	mature	0.66	Y	167411317	167411338	TACGCGCAGACCACAGGATGTC	4	CTGGCTTCCAAAGGCCTCTGTGTGTTCCTGTATGTGGGCGTGCACGTACCTGTCACATGTGTACGCGCAGACCACAGGATGTCCACACTGGCTTCCAAACACATCT
hsa-mir-3939	chr6	-	167411294	167411399	hsa-mir-3939-star	hsa-mir-3939-star_+1_3_-1_5	star	0.33		167411355	167411375	TTCCTGTATGTGGGCGTGCAC	2	CTGGCTTCCAAAGGCCTCTGTGTGTTCCTGTATGTGGGCGTGCACGTACCTGTCACATGTGTACGCGCAGACCACAGGATGTCCACACTGGCTTCCAAACACATCT
hsa-mir-3940	chr19	-	6416420	6416521	hsa-mir-3940	hsa-mir-3940	mature	0.5	Y	6416444	6416465	CAGCCCGGATCCCAGCCCACTT	5	GCTTATCGAGGAAAAGATCGAGGTGGGTTGGGGCGGGCTCTGGGGATTTGGTCTCACAGCCCGGATCCCAGCCCACTTACCTTGGTTACTCTCCTTCCTTCT
hsa-mir-3940	chr19	-	6416420	6416521	hsa-mir-3940	hsa-mir-3940_-1_3	mature	0.2		6416445	6416465	CAGCCCGGATCCCAGCCCACT	2	GCTTATCGAGGAAAAGATCGAGGTGGGTTGGGGCGGGCTCTGGGGATTTGGTCTCACAGCCCGGATCCCAGCCCACTTACCTTGGTTACTCTCCTTCCTTCT
hsa-mir-3940	chr19	-	6416420	6416521	hsa-mir-3940	hsa-mir-3940_-2_3	mature	0.1		6416446	6416465	CAGCCCGGATCCCAGCCCAC	1	GCTTATCGAGGAAAAGATCGAGGTGGGTTGGGGCGGGCTCTGGGGATTTGGTCTCACAGCCCGGATCCCAGCCCACTTACCTTGGTTACTCTCCTTCCTTCT
hsa-mir-3940	chr19	-	6416420	6416521	hsa-mir-3940-star	hsa-mir-3940-star	star	0.1		6416480	6416499	GTGGGTTGGGGCGGGCTCTG	1	GCTTATCGAGGAAAAGATCGAGGTGGGTTGGGGCGGGCTCTGGGGATTTGGTCTCACAGCCCGGATCCCAGCCCACTTACCTTGGTTACTCTCCTTCCTTCT
hsa-mir-3940	chr19	-	6416420	6416521	hsa-mir-3940-star	hsa-mir-3940-star_-1_3	star	0.1		6416481	6416499	GTGGGTTGGGGCGGGCTCT	1	GCTTATCGAGGAAAAGATCGAGGTGGGTTGGGGCGGGCTCTGGGGATTTGGTCTCACAGCCCGGATCCCAGCCCACTTACCTTGGTTACTCTCCTTCCTTCT
hsa-mir-3941	chr10	+	124176480	124176582	hsa-mir-3941	hsa-mir-3941_other1	other	0.13		124176501	124176522	TGTGATGCTCAGTTGTGTGTAG	7	GAGTCAGAATTCTCATCAGGCTGTGATGCTCAGTTGTGTGTAGATTGAAAGCCCTAATTTTACACACAACTGAGGATCATAGCCTGATGGTTCCTTTTTGTTT
hsa-mir-3941	chr10	+	124176480	124176582	hsa-mir-3941	hsa-mir-3941_-1_3	mature	0.32		124176539	124176559	TTACACACAACTGAGGATCAT	17	GAGTCAGAATTCTCATCAGGCTGTGATGCTCAGTTGTGTGTAGATTGAAAGCCCTAATTTTACACACAACTGAGGATCATAGCCTGATGGTTCCTTTTTGTTT
hsa-mir-3941	chr10	+	124176480	124176582	hsa-mir-3941	hsa-mir-3941	mature	0.07	Y	124176539	124176560	TTACACACAACTGAGGATCATA	4	GAGTCAGAATTCTCATCAGGCTGTGATGCTCAGTTGTGTGTAGATTGAAAGCCCTAATTTTACACACAACTGAGGATCATAGCCTGATGGTTCCTTTTTGTTT
hsa-mir-3942	chr15	-	35664456	35664564	hsa-mir-3942-star	hsa-mir-3942-star_-1_3_+1_5	star	0.15		35664479	35664500	TTTCAGATAACAGTATTACATC	28	TCTTCAGTATGACACCTCAAAGAAGCAATACTGTTACCTGAAATAGGCTGCGAAGATAACAGTATTTCAGATAACAGTATTACATCTTTGAAGTGTCATATTCACTGAC
hsa-mir-3942	chr15	-	35664456	35664564	hsa-mir-3942	hsa-mir-3942_+1_3_-1_5	mature	0.2		35664520	35664541	AGCAATACTGTTACCTGAAATA	37	TCTTCAGTATGACACCTCAAAGAAGCAATACTGTTACCTGAAATAGGCTGCGAAGATAACAGTATTTCAGATAACAGTATTACATCTTTGAAGTGTCATATTCACTGAC
hsa-mir-3942	chr15	-	35664456	35664564	hsa-mir-3942	hsa-mir-3942_-1_5	mature	0.48		35664521	35664541	AGCAATACTGTTACCTGAAAT	90	TCTTCAGTATGACACCTCAAAGAAGCAATACTGTTACCTGAAATAGGCTGCGAAGATAACAGTATTTCAGATAACAGTATTACATCTTTGAAGTGTCATATTCACTGAC
hsa-mir-3942	chr15	-	35664456	35664564	hsa-mir-3942	hsa-mir-3942	mature	0.01	Y	35664521	35664542	AAGCAATACTGTTACCTGAAAT	3	TCTTCAGTATGACACCTCAAAGAAGCAATACTGTTACCTGAAATAGGCTGCGAAGATAACAGTATTTCAGATAACAGTATTACATCTTTGAAGTGTCATATTCACTGAC
hsa-mir-3943	chr7	+	43190493	43190592	hsa-mir-3943	hsa-mir-3943_-1_3	mature	0.35		43190515	43190536	TAGCCCCCAGGCTTCACTTGGC	7	CACACAGACGGCAGCTGCGGCCTAGCCCCCAGGCTTCACTTGGCGTGGACAACTTGCTAAGTAAAGTGGGGGGTGGGCCACGGCTGGCTCCTACCTGGAC
hsa-mir-3943	chr7	+	43190493	43190592	hsa-mir-3943	hsa-mir-3943	mature	0.5	Y	43190515	43190537	TAGCCCCCAGGCTTCACTTGGCG	10	CACACAGACGGCAGCTGCGGCCTAGCCCCCAGGCTTCACTTGGCGTGGACAACTTGCTAAGTAAAGTGGGGGGTGGGCCACGGCTGGCTCCTACCTGGAC
hsa-mir-409	chr14	+	101531636	101531714	hsa-mir-409-5p	hsa-mir-409-5p_+1_3	mature	0.3		101531650	101531673	AGGTTACCCGAGCAACTTTGCATC	3	TGGTACTCGGGGAGAGGTTACCCGAGCAACTTTGCATCTGGACGACGAATGTTGCTCGGTGAACCCCTTTTCGGTATCA
hsa-mir-409	chr14	+	101531636	101531714	hsa-mir-409-3p	hsa-mir-409-3p_+1_5	mature	0.1		101531681	101531703	CGAATGTTGCTCGGTGAACCCCT	1	TGGTACTCGGGGAGAGGTTACCCGAGCAACTTTGCATCTGGACGACGAATGTTGCTCGGTGAACCCCTTTTCGGTATCA
hsa-mir-409	chr14	+	101531636	101531714	hsa-mir-409-3p	hsa-mir-409-3p_+2_3_+1_5	mature	0.1		101531681	101531705	CGAATGTTGCTCGGTGAACCCCTTT	1	TGGTACTCGGGGAGAGGTTACCCGAGCAACTTTGCATCTGGACGACGAATGTTGCTCGGTGAACCCCTTTTCGGTATCA
hsa-mir-409	chr14	+	101531636	101531714	hsa-mir-409-3p	hsa-mir-409-3p	mature	0.4	Y	101531682	101531703	GAATGTTGCTCGGTGAACCCCT	4	TGGTACTCGGGGAGAGGTTACCCGAGCAACTTTGCATCTGGACGACGAATGTTGCTCGGTGAACCCCTTTTCGGTATCA
hsa-mir-409	chr14	+	101531636	101531714	hsa-mir-409-3p	hsa-mir-409-3p_+1_3	mature	0.1		101531682	101531704	GAATGTTGCTCGGTGAACCCCTT	1	TGGTACTCGGGGAGAGGTTACCCGAGCAACTTTGCATCTGGACGACGAATGTTGCTCGGTGAACCCCTTTTCGGTATCA
hsa-mir-410	chr14	+	101532248	101532327	hsa-mir-410	hsa-mir-410	mature	1	Y	101532297	101532317	AATATAACACAGATGGCCTGT	7	GGTACCTGAGAAGAGGTTGTCTGTGATGAGTTCGCTTTTATTAATGACGAATATAACACAGATGGCCTGTTTTCAGTACC
hsa-mir-411	chr14	+	101489661	101489756	hsa-mir-411	hsa-mir-411_-1_3	mature	0.2		101489676	101489695	TAGTAGACCGTATAGCGTAC	1	TGGTACTTGGAGAGATAGTAGACCGTATAGCGTACGCTTTATCTGTGACGTATGTAACACGGTCCACTAACCCTCAGTATCAAATCCATCCCCGAG
hsa-mir-411	chr14	+	101489661	101489756	hsa-mir-411	hsa-mir-411	mature	0.2	Y	101489676	101489696	TAGTAGACCGTATAGCGTACG	1	TGGTACTTGGAGAGATAGTAGACCGTATAGCGTACGCTTTATCTGTGACGTATGTAACACGGTCCACTAACCCTCAGTATCAAATCCATCCCCGAG
hsa-mir-411	chr14	+	101489661	101489756	hsa-mir-411*	hsa-mir-411*_-1_3	mature	0.6		101489711	101489731	TATGTAACACGGTCCACTAAC	3	TGGTACTTGGAGAGATAGTAGACCGTATAGCGTACGCTTTATCTGTGACGTATGTAACACGGTCCACTAACCCTCAGTATCAAATCCATCCCCGAG
hsa-mir-421	chrX	-	73438211	73438295	hsa-mir-421	hsa-mir-421	mature	0.72	Y	73438226	73438248	ATCAACAGACATTAATTGGGCGC	1784	GCACATTGTAGGCCTCATTAAATGTTTGTTGAATGAAAAAATGAATCATCAACAGACATTAATTGGGCGCCTGCTCTGTGATCTC
hsa-mir-423	chr17	+	28444096	28444189	hsa-mir-423-5p	hsa-mir-423-5p	mature	0.09	Y	28444112	28444134	TGAGGGGCAGAGAGCGAGACTTT	5085	ATAAAGGAAGTTAGGCTGAGGGGCAGAGAGCGAGACTTTTCTATTTTCCAAAAGCTCGGTCTGAGGCCCCTCAGTCTTGCTTCCTAACCCGCGC
hsa-mir-423	chr17	+	28444096	28444189	hsa-mir-423-3p	hsa-mir-423-3p	mature	0.59	Y	28444148	28444170	AGCTCGGTCTGAGGCCCCTCAGT	32477	ATAAAGGAAGTTAGGCTGAGGGGCAGAGAGCGAGACTTTTCTATTTTCCAAAAGCTCGGTCTGAGGCCCCTCAGTCTTGCTTCCTAACCCGCGC
hsa-mir-424	chrX	-	133680643	133680740	hsa-mir-424*	hsa-mir-424*	mature	0.05	Y	133680673	133680693	CAAAACGTGAGGCGCTGCTAT	12	CGAGGGGATACAGCAGCAATTCATGTTTTGAAGTGTTCTAAATGGTTCAAAACGTGAGGCGCTGCTATACCCCCTCGTGGGGAAGGTAGAAGGTGGGG
hsa-mir-424	chrX	-	133680643	133680740	hsa-mir-424	hsa-mir-424	mature	0.51	Y	133680709	133680730	CAGCAGCAATTCATGTTTTGAA	107	CGAGGGGATACAGCAGCAATTCATGTTTTGAAGTGTTCTAAATGGTTCAAAACGTGAGGCGCTGCTATACCCCCTCGTGGGGAAGGTAGAAGGTGGGG
hsa-mir-424	chrX	-	133680643	133680740	hsa-mir-424	hsa-mir-424_-1_3	mature	0.33		133680710	133680730	CAGCAGCAATTCATGTTTTGA	69	CGAGGGGATACAGCAGCAATTCATGTTTTGAAGTGTTCTAAATGGTTCAAAACGTGAGGCGCTGCTATACCCCCTCGTGGGGAAGGTAGAAGGTGGGG
hsa-mir-425	chr3	-	49057580	49057666	hsa-mir-425*	hsa-mir-425*	mature	0	Y	49057591	49057612	ATCGGGAATGTCGTGTCCGCCC	112	GAAAGCGCTTTGGAATGACACGATCACTCCCGTTGAGTGGGCACCCGAGAAGCCATCGGGAATGTCGTGTCCGCCCAGTGCTCTTTC
hsa-mir-425	chr3	-	49057580	49057666	hsa-mir-425	hsa-mir-425_+2_3	mature	0.13		49057629	49057653	AATGACACGATCACTCCCGTTGAGT	7030	GAAAGCGCTTTGGAATGACACGATCACTCCCGTTGAGTGGGCACCCGAGAAGCCATCGGGAATGTCGTGTCCGCCCAGTGCTCTTTC
hsa-mir-425	chr3	-	49057580	49057666	hsa-mir-425	hsa-mir-425	mature	0.19	Y	49057631	49057653	AATGACACGATCACTCCCGTTGA	9669	GAAAGCGCTTTGGAATGACACGATCACTCCCGTTGAGTGGGCACCCGAGAAGCCATCGGGAATGTCGTGTCCGCCCAGTGCTCTTTC
hsa-mir-425	chr3	-	49057580	49057666	hsa-mir-425	hsa-mir-425_-1_3	mature	0.49		49057632	49057653	AATGACACGATCACTCCCGTTG	24994	GAAAGCGCTTTGGAATGACACGATCACTCCCGTTGAGTGGGCACCCGAGAAGCCATCGGGAATGTCGTGTCCGCCCAGTGCTCTTTC
hsa-mir-4254	chr1	-	32224260	32224335	hsa-mir-4254	hsa-mir-4254_-1_5	mature	0.2		32224270	32224291	CCTGGAGCTACTCCACCATCTC	4	CTTGGGAGGAGGGTGGGGTGGCTCCTCTGCAGTGAGTAGGTCTGCCTGGAGCTACTCCACCATCTCCCCCAGCCCC
hsa-mir-4254	chr1	-	32224260	32224335	hsa-mir-4254	hsa-mir-4254_-1_3_-1_5	mature	0.15		32224271	32224291	CCTGGAGCTACTCCACCATCT	3	CTTGGGAGGAGGGTGGGGTGGCTCCTCTGCAGTGAGTAGGTCTGCCTGGAGCTACTCCACCATCTCCCCCAGCCCC
hsa-mir-4254	chr1	-	32224260	32224335	hsa-mir-4254	hsa-mir-4254_-1_3	mature	0.3		32224271	32224292	GCCTGGAGCTACTCCACCATCT	6	CTTGGGAGGAGGGTGGGGTGGCTCCTCTGCAGTGAGTAGGTCTGCCTGGAGCTACTCCACCATCTCCCCCAGCCCC
hsa-mir-4254	chr1	-	32224260	32224335	hsa-mir-4254	hsa-mir-4254_-2_3	mature	0.15		32224272	32224292	GCCTGGAGCTACTCCACCATC	3	CTTGGGAGGAGGGTGGGGTGGCTCCTCTGCAGTGAGTAGGTCTGCCTGGAGCTACTCCACCATCTCCCCCAGCCCC
hsa-mir-4254	chr1	-	32224260	32224335	hsa-mir-4254	hsa-mir-4254_-3_3	mature	0.15		32224273	32224292	GCCTGGAGCTACTCCACCAT	3	CTTGGGAGGAGGGTGGGGTGGCTCCTCTGCAGTGAGTAGGTCTGCCTGGAGCTACTCCACCATCTCCCCCAGCCCC
hsa-mir-4286	chr8	+	10524487	10524579	hsa-mir-4286	hsa-mir-4286_+2_3	mature	0.9		10524497	10524515	ACCCCACTCCTGGTACCAT	467	TACTTATGGCACCCCACTCCTGGTACCATAGTCATAAGTTAGGAGATGTTAGAGCTGTGAGTACCATGACTTAAGTGTGGTGGCTTAAACATG
hsa-mir-429	chr1	+	1104384	1104466	hsa-mir-429	hsa-mir-429	mature	0.86	Y	1104434	1104455	TAATACTGTCTGGTAAAACCGT	209404	CGCCGGCCGATGGGCGTCTTACCAGACATGGTTAGACCTGGCCCTCTGTCTAATACTGTCTGGTAAAACCGTCCATCCGCTGC
hsa-mir-4306	chr13	+	100295312	100295402	hsa-mir-4306	hsa-mir-4306_-1_3	mature	0.72		100295376	100295391	TGGAGAGAAAGGCAGT	8	AAGCTGCTTAGTGTCCTTAGAGTCTCCAGAGGCATCCCTAACCCAGAATCTTTTGACTGTCCTCTGGAGAGAAAGGCAGTAGGTCTGTACC
hsa-mir-4306	chr13	+	100295312	100295402	hsa-mir-4306	hsa-mir-4306	mature	0.27	Y	100295376	100295392	TGGAGAGAAAGGCAGTA	3	AAGCTGCTTAGTGTCCTTAGAGTCTCCAGAGGCATCCCTAACCCAGAATCTTTTGACTGTCCTCTGGAGAGAAAGGCAGTAGGTCTGTACC
hsa-mir-4326	chr20	+	61918159	61918217	hsa-mir-4326	hsa-mir-4326	mature	0.01	Y	61918169	61918188	TGTTCCTCTGTCTCCCAGAC	8	GCTGCTCTGCTGTTCCTCTGTCTCCCAGACTCTGGGTGGATGGAGCAGGTCGGGGGCCA
hsa-mir-4326	chr20	+	61918159	61918217	hsa-mir-4326	hsa-mir-4326_+3_3	mature	0.45		61918169	61918191	TGTTCCTCTGTCTCCCAGACTCT	271	GCTGCTCTGCTGTTCCTCTGTCTCCCAGACTCTGGGTGGATGGAGCAGGTCGGGGGCCA
hsa-mir-4326	chr20	+	61918159	61918217	hsa-mir-4326	hsa-mir-4326_other1	other	0.17		61918169	61918192	TGTTCCTCTGTCTCCCAGACTCTG	106	GCTGCTCTGCTGTTCCTCTGTCTCCCAGACTCTGGGTGGATGGAGCAGGTCGGGGGCCA
hsa-mir-4326	chr20	+	61918159	61918217	hsa-mir-4326	hsa-mir-4326_other2	other	0.16		61918169	61918193	TGTTCCTCTGTCTCCCAGACTCTGG	97	GCTGCTCTGCTGTTCCTCTGTCTCCCAGACTCTGGGTGGATGGAGCAGGTCGGGGGCCA
hsa-mir-449a	chr5	-	54466359	54466449	hsa-mir-449a	hsa-mir-449a	mature	0.78	Y	54466413	54466434	TGGCAGTGTATTGTTAGCTGGT	7800	CTGTGTGTGATGAGCTGGCAGTGTATTGTTAGCTGGTTGAATATGTGAATGGCATCGGCTAACATGCAACTGCTGTCTTATTGCATATACA
hsa-mir-449b	chr5	-	54466473	54466569	hsa-mir-449b*	hsa-mir-449b*	mature	0.04	Y	54466494	54466515	CAGCCACAACTACCCTGCCACT	86	TGACCTGAATCAGGTAGGCAGTGTATTGTTAGCTGGCTGCTTGGGTCAAGTCAGCAGCCACAACTACCCTGCCACTTGCTTCTGGATAAATTCTTCT
hsa-mir-449b	chr5	-	54466473	54466569	hsa-mir-449b	hsa-mir-449b_other1	other	0.1		54466529	54466554	AGGCAGTGTATTGTTAGCTGGCTGCT	197	TGACCTGAATCAGGTAGGCAGTGTATTGTTAGCTGGCTGCTTGGGTCAAGTCAGCAGCCACAACTACCCTGCCACTTGCTTCTGGATAAATTCTTCT
hsa-mir-449b	chr5	-	54466473	54466569	hsa-mir-449b	hsa-mir-449b_+3_3	mature	0.34		54466530	54466554	AGGCAGTGTATTGTTAGCTGGCTGC	679	TGACCTGAATCAGGTAGGCAGTGTATTGTTAGCTGGCTGCTTGGGTCAAGTCAGCAGCCACAACTACCCTGCCACTTGCTTCTGGATAAATTCTTCT
hsa-mir-449b	chr5	-	54466473	54466569	hsa-mir-449b	hsa-mir-449b_+1_3	mature	0.1		54466532	54466554	AGGCAGTGTATTGTTAGCTGGCT	198	TGACCTGAATCAGGTAGGCAGTGTATTGTTAGCTGGCTGCTTGGGTCAAGTCAGCAGCCACAACTACCCTGCCACTTGCTTCTGGATAAATTCTTCT
hsa-mir-449b	chr5	-	54466473	54466569	hsa-mir-449b	hsa-mir-449b	mature	0.17	Y	54466533	54466554	AGGCAGTGTATTGTTAGCTGGC	335	TGACCTGAATCAGGTAGGCAGTGTATTGTTAGCTGGCTGCTTGGGTCAAGTCAGCAGCCACAACTACCCTGCCACTTGCTTCTGGATAAATTCTTCT
hsa-mir-449c	chr5	-	54468089	54468180	hsa-mir-449c	hsa-mir-449c_+1_3_-1_5	mature	0.16		54468139	54468163	AGGCAGTGTATTGCTAGCGGCTGTT	197	GCTGGGATGTGTCAGGTAGGCAGTGTATTGCTAGCGGCTGTTAATGATTTTAACAGTTGCTAGTTGCACTCCTCTCTGTTGCATTCAGAAGC
hsa-mir-449c	chr5	-	54468089	54468180	hsa-mir-449c	hsa-mir-449c_-1_5	mature	0.25		54468140	54468163	AGGCAGTGTATTGCTAGCGGCTGT	308	GCTGGGATGTGTCAGGTAGGCAGTGTATTGCTAGCGGCTGTTAATGATTTTAACAGTTGCTAGTTGCACTCCTCTCTGTTGCATTCAGAAGC
hsa-mir-449c	chr5	-	54468089	54468180	hsa-mir-449c	hsa-mir-449c	mature	0.07	Y	54468140	54468164	TAGGCAGTGTATTGCTAGCGGCTGT	87	GCTGGGATGTGTCAGGTAGGCAGTGTATTGCTAGCGGCTGTTAATGATTTTAACAGTTGCTAGTTGCACTCCTCTCTGTTGCATTCAGAAGC
hsa-mir-450a-1	chrX	-	133674370	133674460	hsa-mir-450a-1	hsa-mir-450a-1	mature	0.73	Y	133674422	133674443	TTTTGCGATGTGTTCCTAATAT	233	AAACGATACTAAACTGTTTTTGCGATGTGTTCCTAATATGCACTATAAATATATTGGGAACATTTTGCATGTATAGTTTTGTATCAATATA
hsa-mir-450a-1	chrX	-	133674370	133674460	hsa-mir-450a-1	hsa-mir-450a-1_-2_3	mature	0.16		133674424	133674443	TTTTGCGATGTGTTCCTAAT	53	AAACGATACTAAACTGTTTTTGCGATGTGTTCCTAATATGCACTATAAATATATTGGGAACATTTTGCATGTATAGTTTTGTATCAATATA
hsa-mir-450a-2	chrX	-	133674537	133674636	hsa-mir-450a-2	hsa-mir-450a-2	mature	0.71	Y	133674593	133674614	TTTTGCGATGTGTTCCTAATAT	233	CCAAAGAAAGATGCTAAACTATTTTTGCGATGTGTTCCTAATATGTAATATAAATGTATTGGGGACATTTTGCATTCATAGTTTTGTATCAATAATATGG
hsa-mir-450a-2	chrX	-	133674537	133674636	hsa-mir-450a-2	hsa-mir-450a-2_-2_3	mature	0.16		133674595	133674614	TTTTGCGATGTGTTCCTAAT	53	CCAAAGAAAGATGCTAAACTATTTTTGCGATGTGTTCCTAATATGTAATATAAATGTATTGGGGACATTTTGCATTCATAGTTTTGTATCAATAATATGG
hsa-mir-450b	chrX	-	133674214	133674291	hsa-mir-450b-5p	hsa-mir-450b-5p	mature	0.14	Y	133674260	133674281	TTTTGCAATATGTTCCTGAATA	101	GCAGAATTATTTTTGCAATATGTTCCTGAATATGTAATATAAGTGTATTGGGATCATTTTGCATCCATAGTTTTGTAT
hsa-mir-450b	chrX	-	133674214	133674291	hsa-mir-450b-5p	hsa-mir-450b-5p_-1_3	mature	0.73		133674261	133674281	TTTTGCAATATGTTCCTGAAT	527	GCAGAATTATTTTTGCAATATGTTCCTGAATATGTAATATAAGTGTATTGGGATCATTTTGCATCCATAGTTTTGTAT
hsa-mir-451	chr17	-	27188386	27188457	hsa-mir-451	hsa-mir-451_+1_3	mature	0.51		27188419	27188441	AAACCGTTACCATTACTGAGTTT	284	CTTGGGAATGGCAAGGAAACCGTTACCATTACTGAGTTTAGTAATGGTAATGGTTCTCTTGCTATACCCAGA
hsa-mir-451	chr17	-	27188386	27188457	hsa-mir-451	hsa-mir-451	mature	0.24	Y	27188420	27188441	AAACCGTTACCATTACTGAGTT	136	CTTGGGAATGGCAAGGAAACCGTTACCATTACTGAGTTTAGTAATGGTAATGGTTCTCTTGCTATACCCAGA
hsa-mir-451	chr17	-	27188386	27188457	hsa-mir-451	hsa-mir-451_-1_3	mature	0.13		27188421	27188441	AAACCGTTACCATTACTGAGT	77	CTTGGGAATGGCAAGGAAACCGTTACCATTACTGAGTTTAGTAATGGTAATGGTTCTCTTGCTATACCCAGA
hsa-mir-454	chr17	-	57215118	57215232	hsa-mir-454	hsa-mir-454_+2_3	mature	0.16		57215145	57215169	TAGTGCAATATTGCTTATAGGGTTT	1208	TCTGTTTATCACCAGATCCTAGAACCCTATCAATATTGTCTCTGCTGTGTAAATAGTTCTGAGTAGTGCAATATTGCTTATAGGGTTTTGGTGTTTGGAAAGAACAATGGGCAGG
hsa-mir-454	chr17	-	57215118	57215232	hsa-mir-454	hsa-mir-454_+1_3	mature	0.19		57215146	57215169	TAGTGCAATATTGCTTATAGGGTT	1404	TCTGTTTATCACCAGATCCTAGAACCCTATCAATATTGTCTCTGCTGTGTAAATAGTTCTGAGTAGTGCAATATTGCTTATAGGGTTTTGGTGTTTGGAAAGAACAATGGGCAGG
hsa-mir-454	chr17	-	57215118	57215232	hsa-mir-454	hsa-mir-454	mature	0.41	Y	57215147	57215169	TAGTGCAATATTGCTTATAGGGT	2987	TCTGTTTATCACCAGATCCTAGAACCCTATCAATATTGTCTCTGCTGTGTAAATAGTTCTGAGTAGTGCAATATTGCTTATAGGGTTTTGGTGTTTGGAAAGAACAATGGGCAGG
hsa-mir-454	chr17	-	57215118	57215232	hsa-mir-454*	hsa-mir-454*	mature	0.07	Y	57215188	57215209	ACCCTATCAATATTGTCTCTGC	530	TCTGTTTATCACCAGATCCTAGAACCCTATCAATATTGTCTCTGCTGTGTAAATAGTTCTGAGTAGTGCAATATTGCTTATAGGGTTTTGGTGTTTGGAAAGAACAATGGGCAGG
hsa-mir-455	chr9	+	116971713	116971808	hsa-mir-455-5p	hsa-mir-455-5p	mature	0.1	Y	116971728	116971749	TATGTGCCTTTGGACTACATCG	3011	TCCCTGGCGTGAGGGTATGTGCCTTTGGACTACATCGTGGAAGCCAGCACCATGCAGTCCATGGGCATATACACTTGCCTCAAGGCCTATGTCATC
hsa-mir-455	chr9	+	116971713	116971808	hsa-mir-455-3p	hsa-mir-455-3p	mature	0.15	Y	116971766	116971786	GCAGTCCATGGGCATATACAC	4391	TCCCTGGCGTGAGGGTATGTGCCTTTGGACTACATCGTGGAAGCCAGCACCATGCAGTCCATGGGCATATACACTTGCCTCAAGGCCTATGTCATC
hsa-mir-455	chr9	+	116971713	116971808	hsa-mir-455-3p	hsa-mir-455-3p_+1_3	mature	0.26		116971766	116971787	GCAGTCCATGGGCATATACACT	7188	TCCCTGGCGTGAGGGTATGTGCCTTTGGACTACATCGTGGAAGCCAGCACCATGCAGTCCATGGGCATATACACTTGCCTCAAGGCCTATGTCATC
hsa-mir-483	chr11	-	2155363	2155438	hsa-mir-483-3p	hsa-mir-483-3p_+2_3_-1_5	mature	0.17		2155369	2155390	CACTCCTCTCCTCCCGTCTTCT	121	GAGGGGGAAGACGGGAGGAAAGAAGGGAGTGGTTCCATCACGCCTCCTCACTCCTCTCCTCCCGTCTTCTCCTCTC
hsa-mir-483	chr11	-	2155363	2155438	hsa-mir-483-3p	hsa-mir-483-3p_+2_3	mature	0.13		2155369	2155391	TCACTCCTCTCCTCCCGTCTTCT	88	GAGGGGGAAGACGGGAGGAAAGAAGGGAGTGGTTCCATCACGCCTCCTCACTCCTCTCCTCCCGTCTTCTCCTCTC
hsa-mir-483	chr11	-	2155363	2155438	hsa-mir-483-3p	hsa-mir-483-3p_+1_3	mature	0.39		2155370	2155391	TCACTCCTCTCCTCCCGTCTTC	264	GAGGGGGAAGACGGGAGGAAAGAAGGGAGTGGTTCCATCACGCCTCCTCACTCCTCTCCTCCCGTCTTCTCCTCTC
hsa-mir-483	chr11	-	2155363	2155438	hsa-mir-483-3p	hsa-mir-483-3p	mature	0.1	Y	2155371	2155391	TCACTCCTCTCCTCCCGTCTT	73	GAGGGGGAAGACGGGAGGAAAGAAGGGAGTGGTTCCATCACGCCTCCTCACTCCTCTCCTCCCGTCTTCTCCTCTC
hsa-mir-483	chr11	-	2155363	2155438	hsa-mir-483-5p	hsa-mir-483-5p	mature	0.03	Y	2155410	2155431	AAGACGGGAGGAAAGAAGGGAG	25	GAGGGGGAAGACGGGAGGAAAGAAGGGAGTGGTTCCATCACGCCTCCTCACTCCTCTCCTCCCGTCTTCTCCTCTC
hsa-mir-484	chr16	+	15737150	15737228	hsa-mir-484	hsa-mir-484_-1_3	mature	0.15		15737157	15737177	TCAGGCTCAGTCCCCTCCCGA	3239	AGCCTCGTCAGGCTCAGTCCCCTCCCGATAAACCCCTAAATAGGGACTTTCCCGGGGGGTGACCCTGGCTTTTTTGGCG
hsa-mir-484	chr16	+	15737150	15737228	hsa-mir-484	hsa-mir-484	mature	0.5	Y	15737157	15737178	TCAGGCTCAGTCCCCTCCCGAT	10533	AGCCTCGTCAGGCTCAGTCCCCTCCCGATAAACCCCTAAATAGGGACTTTCCCGGGGGGTGACCCTGGCTTTTTTGGCG
hsa-mir-484	chr16	+	15737150	15737228	hsa-mir-484	hsa-mir-484_+1_3	mature	0.22		15737157	15737179	TCAGGCTCAGTCCCCTCCCGATA	4675	AGCCTCGTCAGGCTCAGTCCCCTCCCGATAAACCCCTAAATAGGGACTTTCCCGGGGGGTGACCCTGGCTTTTTTGGCG
hsa-mir-485	chr14	+	101521755	101521827	hsa-mir-485-3p	hsa-mir-485-3p_+1_5	mature	0.55		101521799	101521821	AGTCATACACGGCTCTCCTCTCT	5	ACTTGGAGAGAGGCTGGCCGTGATGAATTCGATTCATCAAAGCGAGTCATACACGGCTCTCCTCTCTTTTAGT
hsa-mir-485	chr14	+	101521755	101521827	hsa-mir-485-3p	hsa-mir-485-3p	mature	0.33	Y	101521800	101521821	GTCATACACGGCTCTCCTCTCT	3	ACTTGGAGAGAGGCTGGCCGTGATGAATTCGATTCATCAAAGCGAGTCATACACGGCTCTCCTCTCTTTTAGT
hsa-mir-486	chr8	-	41517958	41518025	hsa-mir-486-3p	hsa-mir-486-3p	mature	0.04	Y	41517960	41517980	CGGGGCAGCTCAGTACAGGAT	83	GCATCCTGTACTGAGCTGCCCCGAGGCCCTTCATGCTGCCCAGCTCGGGGCAGCTCAGTACAGGATAC
hsa-mir-486	chr8	-	41517958	41518025	hsa-mir-486-5p	hsa-mir-486-5p_+1_3	mature	0.23		41518000	41518022	TCCTGTACTGAGCTGCCCCGAGG	489	GCATCCTGTACTGAGCTGCCCCGAGGCCCTTCATGCTGCCCAGCTCGGGGCAGCTCAGTACAGGATAC
hsa-mir-486	chr8	-	41517958	41518025	hsa-mir-486-5p	hsa-mir-486-5p	mature	0.39	Y	41518001	41518022	TCCTGTACTGAGCTGCCCCGAG	807	GCATCCTGTACTGAGCTGCCCCGAGGCCCTTCATGCTGCCCAGCTCGGGGCAGCTCAGTACAGGATAC
hsa-mir-486	chr8	-	41517958	41518025	hsa-mir-486-5p	hsa-mir-486-5p_-1_3	mature	0.26		41518002	41518022	TCCTGTACTGAGCTGCCCCGA	550	GCATCCTGTACTGAGCTGCCCCGAGGCCCTTCATGCTGCCCAGCTCGGGGCAGCTCAGTACAGGATAC
hsa-mir-487a	chr14	+	101518782	101518861	hsa-mir-487a	hsa-mir-487a_-2_3	mature	0.2		101518830	101518849	AATCATACAGGGACATCCAG	1	GGTACTTGAAGAGTGGTTATCCCTGCTGTGTTCGCTTAATTTATGACGAATCATACAGGGACATCCAGTTTTTCAGTATC
hsa-mir-487a	chr14	+	101518782	101518861	hsa-mir-487a	hsa-mir-487a_-1_3	mature	0.8		101518830	101518850	AATCATACAGGGACATCCAGT	4	GGTACTTGAAGAGTGGTTATCCCTGCTGTGTTCGCTTAATTTATGACGAATCATACAGGGACATCCAGTTTTTCAGTATC
hsa-mir-487b	chr14	+	101512791	101512874	hsa-mir-487b	hsa-mir-487b	mature	0.71	Y	101512841	101512862	AATCGTACAGGGTCATCCACTT	5	TTGGTACTTGGAGAGTGGTTATCCCTGTCCTGTTCGTTTTGCTCATGTCGAATCGTACAGGGTCATCCACTTTTTCAGTATCAA
hsa-mir-487b	chr14	+	101512791	101512874	hsa-mir-487b	hsa-mir-487b_+1_3	mature	0.14		101512841	101512863	AATCGTACAGGGTCATCCACTTT	1	TTGGTACTTGGAGAGTGGTTATCCCTGTCCTGTTCGTTTTGCTCATGTCGAATCGTACAGGGTCATCCACTTTTTCAGTATCAA
hsa-mir-487b	chr14	+	101512791	101512874	hsa-mir-487b	hsa-mir-487b_-2_5	mature	0.14		101512843	101512862	TCGTACAGGGTCATCCACTT	1	TTGGTACTTGGAGAGTGGTTATCCCTGTCCTGTTCGTTTTGCTCATGTCGAATCGTACAGGGTCATCCACTTTTTCAGTATCAA
hsa-mir-489	chr7	-	93113247	93113330	hsa-mir-489	hsa-mir-489	mature	1	Y	93113258	93113279	GTGACATCACATATACGGCAGC	5	GTGGCAGCTTGGTGGTCGTATGTGTGACGCCATTTACTTGAACCTTTAGGAGTGACATCACATATACGGCAGCTAAACTGCTAC
hsa-mir-491	chr9	+	20716103	20716186	hsa-mir-491-5p	hsa-mir-491-5p	mature	0.08	Y	20716118	20716139	AGTGGGGAACCCTTCCATGAGG	79	TTGACTTAGCTGGGTAGTGGGGAACCCTTCCATGAGGAGTAGAACACTCCTTATGCAAGATTCCCTTCTACCTGGCTGGGTTGG
hsa-mir-491	chr9	+	20716103	20716186	hsa-mir-491-5p	hsa-mir-491-5p_+1_3	mature	0.3		20716118	20716140	AGTGGGGAACCCTTCCATGAGGA	296	TTGACTTAGCTGGGTAGTGGGGAACCCTTCCATGAGGAGTAGAACACTCCTTATGCAAGATTCCCTTCTACCTGGCTGGGTTGG
hsa-mir-491	chr9	+	20716103	20716186	hsa-mir-491-5p	hsa-mir-491-5p_+2_3	mature	0.11		20716118	20716141	AGTGGGGAACCCTTCCATGAGGAG	109	TTGACTTAGCTGGGTAGTGGGGAACCCTTCCATGAGGAGTAGAACACTCCTTATGCAAGATTCCCTTCTACCTGGCTGGGTTGG
hsa-mir-491	chr9	+	20716103	20716186	hsa-mir-491-3p	hsa-mir-491-3p	mature	0.3	Y	20716152	20716173	CTTATGCAAGATTCCCTTCTAC	293	TTGACTTAGCTGGGTAGTGGGGAACCCTTCCATGAGGAGTAGAACACTCCTTATGCAAGATTCCCTTCTACCTGGCTGGGTTGG
hsa-mir-494	chr14	+	101495970	101496050	hsa-mir-494	hsa-mir-494_other1	other	0.75		101496017	101496034	TGAAACATACACGGGAAA	6	GATACTCGAAGGAGAGGTTGTCCGTGTTGTCTTCTCTTTATTTATGATGAAACATACACGGGAAACCTCTTTTTTAGTATC
hsa-mir-494	chr14	+	101495970	101496050	hsa-mir-494	hsa-mir-494_-1_3	mature	0.12		101496017	101496037	TGAAACATACACGGGAAACCT	1	GATACTCGAAGGAGAGGTTGTCCGTGTTGTCTTCTCTTTATTTATGATGAAACATACACGGGAAACCTCTTTTTTAGTATC
hsa-mir-495	chr14	+	101500091	101500172	hsa-mir-495	hsa-mir-495_-1_3	mature	0.17		101500140	101500160	AAACAAACATGGTGCACTTCT	4	TGGTACCTGAAAAGAAGTTGCCCATGTTATTTTCGCTTTATATGTGACGAAACAAACATGGTGCACTTCTTTTTCGGTATCA
hsa-mir-495	chr14	+	101500091	101500172	hsa-mir-495	hsa-mir-495	mature	0.65	Y	101500140	101500161	AAACAAACATGGTGCACTTCTT	15	TGGTACCTGAAAAGAAGTTGCCCATGTTATTTTCGCTTTATATGTGACGAAACAAACATGGTGCACTTCTTTTTCGGTATCA
hsa-mir-495	chr14	+	101500091	101500172	hsa-mir-495	hsa-mir-495_+1_3	mature	0.13		101500140	101500162	AAACAAACATGGTGCACTTCTTT	3	TGGTACCTGAAAAGAAGTTGCCCATGTTATTTTCGCTTTATATGTGACGAAACAAACATGGTGCACTTCTTTTTCGGTATCA
hsa-mir-497	chr17	-	6921229	6921340	hsa-mir-497*	hsa-mir-497*	mature	0.02	Y	6921256	6921277	CAAACCACACTGTGGTGTTAGA	59	CCACCCCGGTCCTGCTCCCGCCCCAGCAGCACACTGTGGTTTGTACGGCACTGTGGCCACGTCCAAACCACACTGTGGTGTTAGAGCGAGGGTGGGGGAGGCACCGCCGAGG
hsa-mir-497	chr17	-	6921229	6921340	hsa-mir-497	hsa-mir-497_+2_3	mature	0.25		6921295	6921317	CAGCAGCACACTGTGGTTTGTAC	693	CCACCCCGGTCCTGCTCCCGCCCCAGCAGCACACTGTGGTTTGTACGGCACTGTGGCCACGTCCAAACCACACTGTGGTGTTAGAGCGAGGGTGGGGGAGGCACCGCCGAGG
hsa-mir-497	chr17	-	6921229	6921340	hsa-mir-497	hsa-mir-497_+1_3	mature	0.24		6921296	6921317	CAGCAGCACACTGTGGTTTGTA	648	CCACCCCGGTCCTGCTCCCGCCCCAGCAGCACACTGTGGTTTGTACGGCACTGTGGCCACGTCCAAACCACACTGTGGTGTTAGAGCGAGGGTGGGGGAGGCACCGCCGAGG
hsa-mir-497	chr17	-	6921229	6921340	hsa-mir-497	hsa-mir-497	mature	0.3	Y	6921297	6921317	CAGCAGCACACTGTGGTTTGT	820	CCACCCCGGTCCTGCTCCCGCCCCAGCAGCACACTGTGGTTTGTACGGCACTGTGGCCACGTCCAAACCACACTGTGGTGTTAGAGCGAGGGTGGGGGAGGCACCGCCGAGG
hsa-mir-499	chr20	+	33578178	33578299	hsa-mir-499-5p	hsa-mir-499-5p	mature	0.5	Y	33578210	33578230	TTAAGACTTGCAGTGATGTTT	222	GCCCTGTCCCCTGTGCCTTGGGCGGGCGGCTGTTAAGACTTGCAGTGATGTTTAACTCCTCTCCACGTGAACATCACAGCAAGTCTGTGCTGCTTCCCGTCCCTACGCTGCCTGGGCAGGGT
hsa-mir-499	chr20	+	33578178	33578299	hsa-mir-499-5p	hsa-mir-499-5p_+1_3	mature	0.31		33578210	33578231	TTAAGACTTGCAGTGATGTTTA	138	GCCCTGTCCCCTGTGCCTTGGGCGGGCGGCTGTTAAGACTTGCAGTGATGTTTAACTCCTCTCCACGTGAACATCACAGCAAGTCTGTGCTGCTTCCCGTCCCTACGCTGCCTGGGCAGGGT
hsa-mir-500a	chrX	+	49773038	49773121	hsa-mir-500a	hsa-mir-500a	mature	0.19	Y	49773050	49773072	TAATCCTTGCTACCTGGGTGAGA	489	GCTCCCCCTCTCTAATCCTTGCTACCTGGGTGAGAGTGCTGTCTGAATGCAATGCACCTGGGCAAGGATTCTGAGAGCGAGAGC
hsa-mir-500a	chrX	+	49773038	49773121	hsa-mir-500a*	hsa-mir-500a*_-2_3_+1_5	mature	0.34		49773088	49773108	AATGCACCTGGGCAAGGATTC	848	GCTCCCCCTCTCTAATCCTTGCTACCTGGGTGAGAGTGCTGTCTGAATGCAATGCACCTGGGCAAGGATTCTGAGAGCGAGAGC
hsa-mir-500a	chrX	+	49773038	49773121	hsa-mir-500a*	hsa-mir-500a*	mature	0.01	Y	49773089	49773110	ATGCACCTGGGCAAGGATTCTG	29	GCTCCCCCTCTCTAATCCTTGCTACCTGGGTGAGAGTGCTGTCTGAATGCAATGCACCTGGGCAAGGATTCTGAGAGCGAGAGC
hsa-mir-500b	chrX	+	49775279	49775357	hsa-mir-500b	hsa-mir-500b_other1	other	0.16		49775288	49775309	TAATCCTTGCTACCTGGGTGAG	188	CCCCCTCTCTAATCCTTGCTACCTGGGTGAGAGTGCTTTCTGAATGCAGTGCACCCAGGCAAGGATTCTGCAAGGGGGA
hsa-mir-500b	chrX	+	49775279	49775357	hsa-mir-500b	hsa-mir-500b_other2	other	0.43		49775288	49775310	TAATCCTTGCTACCTGGGTGAGA	489	CCCCCTCTCTAATCCTTGCTACCTGGGTGAGAGTGCTTTCTGAATGCAGTGCACCCAGGCAAGGATTCTGCAAGGGGGA
hsa-mir-500b	chrX	+	49775279	49775357	hsa-mir-500b	hsa-mir-500b_other3	other	0.2		49775288	49775312	TAATCCTTGCTACCTGGGTGAGAGT	232	CCCCCTCTCTAATCCTTGCTACCTGGGTGAGAGTGCTTTCTGAATGCAGTGCACCCAGGCAAGGATTCTGCAAGGGGGA
hsa-mir-501	chrX	+	49774329	49774412	hsa-mir-501-5p	hsa-mir-501-5p_-1_3	mature	0.14		49774342	49774362	AATCCTTTGTCCCTGGGTGAG	98	GCTCTTCCTCTCTAATCCTTTGTCCCTGGGTGAGAGTGCTTTCTGAATGCAATGCACCCGGGCAAGGATTCTGAGAGGGTGAGC
hsa-mir-501	chrX	+	49774329	49774412	hsa-mir-501-5p	hsa-mir-501-5p	mature	0.07	Y	49774342	49774363	AATCCTTTGTCCCTGGGTGAGA	51	GCTCTTCCTCTCTAATCCTTTGTCCCTGGGTGAGAGTGCTTTCTGAATGCAATGCACCCGGGCAAGGATTCTGAGAGGGTGAGC
hsa-mir-501	chrX	+	49774329	49774412	hsa-mir-501-5p	hsa-mir-501-5p_+1_3	mature	0.1		49774342	49774364	AATCCTTTGTCCCTGGGTGAGAG	70	GCTCTTCCTCTCTAATCCTTTGTCCCTGGGTGAGAGTGCTTTCTGAATGCAATGCACCCGGGCAAGGATTCTGAGAGGGTGAGC
hsa-mir-501	chrX	+	49774329	49774412	hsa-mir-501-5p	hsa-mir-501-5p_+2_3	mature	0.36		49774342	49774365	AATCCTTTGTCCCTGGGTGAGAGT	248	GCTCTTCCTCTCTAATCCTTTGTCCCTGGGTGAGAGTGCTTTCTGAATGCAATGCACCCGGGCAAGGATTCTGAGAGGGTGAGC
hsa-mir-501	chrX	+	49774329	49774412	hsa-mir-501-3p	hsa-mir-501-3p	mature	0.19	Y	49774379	49774400	AATGCACCCGGGCAAGGATTCT	130	GCTCTTCCTCTCTAATCCTTTGTCCCTGGGTGAGAGTGCTTTCTGAATGCAATGCACCCGGGCAAGGATTCTGAGAGGGTGAGC
hsa-mir-502	chrX	+	49779205	49779290	hsa-mir-502-3p	hsa-mir-502-3p_-1_3	mature	0.55		49779256	49779276	AATGCACCTGGGCAAGGATTC	848	TGCTCCCCCTCTCTAATCCTTGCTATCTGGGTGCTAGTGCTGGCTCAATGCAATGCACCTGGGCAAGGATTCAGAGAGGGGGAGCT
hsa-mir-502	chrX	+	49779205	49779290	hsa-mir-502-3p	hsa-mir-502-3p	mature	0.13	Y	49779256	49779277	AATGCACCTGGGCAAGGATTCA	212	TGCTCCCCCTCTCTAATCCTTGCTATCTGGGTGCTAGTGCTGGCTCAATGCAATGCACCTGGGCAAGGATTCAGAGAGGGGGAGCT
hsa-mir-503	chrX	-	133680357	133680427	hsa-mir-503	hsa-mir-503	mature	0.5	Y	133680400	133680422	TAGCAGCGGGAACAGTTCTGCAG	11	TGCCCTAGCAGCGGGAACAGTTCTGCAGTGAGCGATCGGTGCTCTGGGGTATTGTTTCCGCTGCCAGGGTA
hsa-mir-503	chrX	-	133680357	133680427	hsa-mir-503	hsa-mir-503_-1_3	mature	0.18		133680401	133680422	TAGCAGCGGGAACAGTTCTGCA	4	TGCCCTAGCAGCGGGAACAGTTCTGCAGTGAGCGATCGGTGCTCTGGGGTATTGTTTCCGCTGCCAGGGTA
hsa-mir-505	chrX	-	139006306	139006389	hsa-mir-505	hsa-mir-505_other1	other	0.1		139006316	139006337	TCAACACTTGCTGGTTTCCTCT	384	GATGCACCCAGTGGGGGAGCCAGGAAGTATTGATGTTTCTGCCAGTTTAGCGTCAACACTTGCTGGTTTCCTCTCTGGAGCATC
hsa-mir-505	chrX	-	139006306	139006389	hsa-mir-505	hsa-mir-505_+2_3_-1_5	mature	0.11		139006316	139006338	GTCAACACTTGCTGGTTTCCTCT	415	GATGCACCCAGTGGGGGAGCCAGGAAGTATTGATGTTTCTGCCAGTTTAGCGTCAACACTTGCTGGTTTCCTCTCTGGAGCATC
hsa-mir-505	chrX	-	139006306	139006389	hsa-mir-505	hsa-mir-505_+1_3_-2_5	mature	0.1		139006317	139006337	TCAACACTTGCTGGTTTCCTC	376	GATGCACCCAGTGGGGGAGCCAGGAAGTATTGATGTTTCTGCCAGTTTAGCGTCAACACTTGCTGGTTTCCTCTCTGGAGCATC
hsa-mir-505	chrX	-	139006306	139006389	hsa-mir-505	hsa-mir-505_+1_3_-1_5	mature	0.12		139006317	139006338	GTCAACACTTGCTGGTTTCCTC	448	GATGCACCCAGTGGGGGAGCCAGGAAGTATTGATGTTTCTGCCAGTTTAGCGTCAACACTTGCTGGTTTCCTCTCTGGAGCATC
hsa-mir-505	chrX	-	139006306	139006389	hsa-mir-505	hsa-mir-505	mature	0.1	Y	139006318	139006339	CGTCAACACTTGCTGGTTTCCT	374	GATGCACCCAGTGGGGGAGCCAGGAAGTATTGATGTTTCTGCCAGTTTAGCGTCAACACTTGCTGGTTTCCTCTCTGGAGCATC
hsa-mir-505	chrX	-	139006306	139006389	hsa-mir-505*	hsa-mir-505*	mature	0.01	Y	139006354	139006375	GGGAGCCAGGAAGTATTGATGT	40	GATGCACCCAGTGGGGGAGCCAGGAAGTATTGATGTTTCTGCCAGTTTAGCGTCAACACTTGCTGGTTTCCTCTCTGGAGCATC
hsa-mir-514-1	chrX	-	146360764	146360861	hsa-mir-514-1	hsa-mir-514-1	mature	0.57	Y	146360783	146360803	ATTGACACTTCTGTGAGTAGA	11	AACATGTTGTCTGTGGTACCCTACTCTGGAGAGTGACAATCATGTATAATTAAATTTGATTGACACTTCTGTGAGTAGAGTAACGCATGACACGTACG
hsa-mir-514-1	chrX	-	146360764	146360861	hsa-mir-514-1	hsa-mir-514-1_+2_5	mature	0.21		146360783	146360805	TGATTGACACTTCTGTGAGTAGA	4	AACATGTTGTCTGTGGTACCCTACTCTGGAGAGTGACAATCATGTATAATTAAATTTGATTGACACTTCTGTGAGTAGAGTAACGCATGACACGTACG
hsa-mir-514-1	chrX	-	146360764	146360861	hsa-mir-514-1	hsa-mir-514-1_+3_5	mature	0.1		146360783	146360806	TTGATTGACACTTCTGTGAGTAGA	2	AACATGTTGTCTGTGGTACCCTACTCTGGAGAGTGACAATCATGTATAATTAAATTTGATTGACACTTCTGTGAGTAGAGTAACGCATGACACGTACG
hsa-mir-514-2	chrX	-	146363460	146363547	hsa-mir-514-2	hsa-mir-514-2	mature	0.57	Y	146363474	146363494	ATTGACACTTCTGTGAGTAGA	11	GTTGTCTGTGGTACCCTACTCTGGAGAGTGACAATCATGTATAACTAAATTTGATTGACACTTCTGTGAGTAGAGTAACGCATGACAC
hsa-mir-514-2	chrX	-	146363460	146363547	hsa-mir-514-2	hsa-mir-514-2_+2_5	mature	0.21		146363474	146363496	TGATTGACACTTCTGTGAGTAGA	4	GTTGTCTGTGGTACCCTACTCTGGAGAGTGACAATCATGTATAACTAAATTTGATTGACACTTCTGTGAGTAGAGTAACGCATGACAC
hsa-mir-514-2	chrX	-	146363460	146363547	hsa-mir-514-2	hsa-mir-514-2_+3_5	mature	0.1		146363474	146363497	TTGATTGACACTTCTGTGAGTAGA	2	GTTGTCTGTGGTACCCTACTCTGGAGAGTGACAATCATGTATAACTAAATTTGATTGACACTTCTGTGAGTAGAGTAACGCATGACAC
hsa-mir-514-3	chrX	-	146366158	146366245	hsa-mir-514-3	hsa-mir-514-3	mature	0.57	Y	146366172	146366192	ATTGACACTTCTGTGAGTAGA	11	GTTGTCTGTGGTACCCTACTCTGGAGAGTGACAATCATGTATAACTAAATTTGATTGACACTTCTGTGAGTAGAGTAACGCATGACAC
hsa-mir-514-3	chrX	-	146366158	146366245	hsa-mir-514-3	hsa-mir-514-3_+2_5	mature	0.21		146366172	146366194	TGATTGACACTTCTGTGAGTAGA	4	GTTGTCTGTGGTACCCTACTCTGGAGAGTGACAATCATGTATAACTAAATTTGATTGACACTTCTGTGAGTAGAGTAACGCATGACAC
hsa-mir-514-3	chrX	-	146366158	146366245	hsa-mir-514-3	hsa-mir-514-3_+3_5	mature	0.1		146366172	146366195	TTGATTGACACTTCTGTGAGTAGA	2	GTTGTCTGTGGTACCCTACTCTGGAGAGTGACAATCATGTATAACTAAATTTGATTGACACTTCTGTGAGTAGAGTAACGCATGACAC
hsa-mir-515-1	chr19	+	54182256	54182338	hsa-mir-515-1-5p	hsa-mir-515-1-5p_-1_3	mature	0.3		54182269	54182291	TTCTCCAAAAGAAAGCACTTTCT	6	TCTCATGCAGTCATTCTCCAAAAGAAAGCACTTTCTGTTGTCTGAAAGCAGAGTGCCTTCTTTTGGAGCGTTACTGTTTGAGA
hsa-mir-515-1	chr19	+	54182256	54182338	hsa-mir-515-1-5p	hsa-mir-515-1-5p	mature	0.65	Y	54182269	54182292	TTCTCCAAAAGAAAGCACTTTCTG	13	TCTCATGCAGTCATTCTCCAAAAGAAAGCACTTTCTGTTGTCTGAAAGCAGAGTGCCTTCTTTTGGAGCGTTACTGTTTGAGA
hsa-mir-515-2	chr19	+	54188262	54188344	hsa-mir-515-2-5p	hsa-mir-515-2-5p_-1_3	mature	0.3		54188275	54188297	TTCTCCAAAAGAAAGCACTTTCT	6	TCTCATGCAGTCATTCTCCAAAAGAAAGCACTTTCTGTTGTCTGAAAGCAGAGTGCCTTCTTTTGGAGCGTTACTGTTTGAGA
hsa-mir-515-2	chr19	+	54188262	54188344	hsa-mir-515-2-5p	hsa-mir-515-2-5p	mature	0.65	Y	54188275	54188298	TTCTCCAAAAGAAAGCACTTTCTG	13	TCTCATGCAGTCATTCTCCAAAAGAAAGCACTTTCTGTTGTCTGAAAGCAGAGTGCCTTCTTTTGGAGCGTTACTGTTTGAGA
hsa-mir-519c	chr19	+	54189722	54189808	hsa-mir-519c-3p	hsa-mir-519c-3p	mature	1	Y	54189775	54189796	AAAGTGCATCTTTTTAGAGGAT	10	TCTCAGCCTGTGACCCTCTAGAGGGAAGCGCTTTCTGTTGTCTGAAAGAAAAGAAAGTGCATCTTTTTAGAGGATTACAGTTTGAGA
hsa-mir-520a	chr19	+	54194134	54194218	hsa-mir-520a-5p	hsa-mir-520a-5p_-2_3	mature	0.2		54194148	54194166	CTCCAGAGGGAAGTACTTT	1	CTCAGGCTGTGACCCTCCAGAGGGAAGTACTTTCTGTTGTCTGAGAGAAAAGAAAGTGCTTCCCTTTGGACTGTTTCGGTTTGAG
hsa-mir-520a	chr19	+	54194134	54194218	hsa-mir-520a-5p	hsa-mir-520a-5p	mature	0.2	Y	54194148	54194168	CTCCAGAGGGAAGTACTTTCT	1	CTCAGGCTGTGACCCTCCAGAGGGAAGTACTTTCTGTTGTCTGAGAGAAAAGAAAGTGCTTCCCTTTGGACTGTTTCGGTTTGAG
hsa-mir-520a	chr19	+	54194134	54194218	hsa-mir-520a-3p	hsa-mir-520a-3p_-2_3	mature	0.2		54194186	54194205	AAAGTGCTTCCCTTTGGACT	1	CTCAGGCTGTGACCCTCCAGAGGGAAGTACTTTCTGTTGTCTGAGAGAAAAGAAAGTGCTTCCCTTTGGACTGTTTCGGTTTGAG
hsa-mir-520a	chr19	+	54194134	54194218	hsa-mir-520a-3p	hsa-mir-520a-3p_-1_3	mature	0.2		54194186	54194206	AAAGTGCTTCCCTTTGGACTG	1	CTCAGGCTGTGACCCTCCAGAGGGAAGTACTTTCTGTTGTCTGAGAGAAAAGAAAGTGCTTCCCTTTGGACTGTTTCGGTTTGAG
hsa-mir-532	chrX	+	49767753	49767843	hsa-mir-532-5p	hsa-mir-532-5p	mature	0.71	Y	49767772	49767793	CATGCCTTGAGTGTAGGACCGT	12939	CGACTTGCTTTCTCTCCTCCATGCCTTGAGTGTAGGACCGTTGGCATCTTAATTACCCTCCCACACCCAAGGCTTGCAAAAAAGCGAGCCT
hsa-mir-532	chrX	+	49767753	49767843	hsa-mir-532-5p	hsa-mir-532-5p_+1_3	mature	0.1		49767772	49767794	CATGCCTTGAGTGTAGGACCGTT	1836	CGACTTGCTTTCTCTCCTCCATGCCTTGAGTGTAGGACCGTTGGCATCTTAATTACCCTCCCACACCCAAGGCTTGCAAAAAAGCGAGCCT
hsa-mir-532	chrX	+	49767753	49767843	hsa-mir-532-3p	hsa-mir-532-3p	mature	0.01	Y	49767809	49767830	CCTCCCACACCCAAGGCTTGCA	271	CGACTTGCTTTCTCTCCTCCATGCCTTGAGTGTAGGACCGTTGGCATCTTAATTACCCTCCCACACCCAAGGCTTGCAAAAAAGCGAGCCT
hsa-mir-539	chr14	+	101513657	101513734	hsa-mir-539	hsa-mir-539	mature	0.45	Y	101513665	101513686	GGAGAAATTATCCTTGGTGTGT	5	ATACTTGAGGAGAAATTATCCTTGGTGTGTTCGCTTTATTTATGATGAATCATACAAGGACAATTTCTTTTTGAGTAT
hsa-mir-539	chr14	+	101513657	101513734	hsa-mir-539	hsa-mir-539_+1_3	mature	0.27		101513665	101513687	GGAGAAATTATCCTTGGTGTGTT	3	ATACTTGAGGAGAAATTATCCTTGGTGTGTTCGCTTTATTTATGATGAATCATACAAGGACAATTTCTTTTTGAGTAT
hsa-mir-542	chrX	-	133675370	133675466	hsa-mir-542-3p	hsa-mir-542-3p	mature	0.46	Y	133675393	133675414	TGTGACAGATTGATAACTGAAA	38	CAGATCTCAGACATCTCGGGGATCATCATGTCACGAGATACCAGTGTGCACTTGTGACAGATTGATAACTGAAAGGTCTGGGAGCCACTCATCTTCA
hsa-mir-542	chrX	-	133675370	133675466	hsa-mir-542-3p	hsa-mir-542-3p_-1_3	mature	0.14		133675394	133675414	TGTGACAGATTGATAACTGAA	12	CAGATCTCAGACATCTCGGGGATCATCATGTCACGAGATACCAGTGTGCACTTGTGACAGATTGATAACTGAAAGGTCTGGGAGCCACTCATCTTCA
hsa-mir-542	chrX	-	133675370	133675466	hsa-mir-542-3p	hsa-mir-542-3p_-2_3	mature	0.17		133675395	133675414	TGTGACAGATTGATAACTGA	14	CAGATCTCAGACATCTCGGGGATCATCATGTCACGAGATACCAGTGTGCACTTGTGACAGATTGATAACTGAAAGGTCTGGGAGCCACTCATCTTCA
hsa-mir-542	chrX	-	133675370	133675466	hsa-mir-542-5p	hsa-mir-542-5p	mature	0.03	Y	133675429	133675451	TCGGGGATCATCATGTCACGAGA	3	CAGATCTCAGACATCTCGGGGATCATCATGTCACGAGATACCAGTGTGCACTTGTGACAGATTGATAACTGAAAGGTCTGGGAGCCACTCATCTTCA
hsa-mir-543	chr14	+	101498323	101498400	hsa-mir-543	hsa-mir-543	mature	0.64	Y	101498369	101498390	AAACATTCGCGGTGCACTTCTT	16	TACTTAATGAGAAGTTGCCCGTGTTTTTTTCGCTTTATTTGTGACGAAACATTCGCGGTGCACTTCTTTTTCAGTATC
hsa-mir-543	chr14	+	101498323	101498400	hsa-mir-543	hsa-mir-543_+1_3	mature	0.2		101498369	101498391	AAACATTCGCGGTGCACTTCTTT	5	TACTTAATGAGAAGTTGCCCGTGTTTTTTTCGCTTTATTTGTGACGAAACATTCGCGGTGCACTTCTTTTTCAGTATC
hsa-mir-543	chr14	+	101498323	101498400	hsa-mir-543	hsa-mir-543_+2_3	mature	0.12		101498369	101498392	AAACATTCGCGGTGCACTTCTTTT	3	TACTTAATGAGAAGTTGCCCGTGTTTTTTTCGCTTTATTTGTGACGAAACATTCGCGGTGCACTTCTTTTTCAGTATC
hsa-mir-545	chrX	-	73506938	73507043	hsa-mir-545	hsa-mir-545	mature	0.13	Y	73506960	73506981	TCAGCAAACATTTATTGTGTGC	35	CCCAGCCTGGCACATTAGTAGGCCTCAGTAAATGTTTATTAGATGAATAAATGAATGACTCATCAGCAAACATTTATTGTGTGCCTGCTAAAGTGAGCTCCACAGG
hsa-mir-545	chrX	-	73506938	73507043	hsa-mir-545	hsa-mir-545_other1	other	0.14		73506982	73506998	AATAAATGAATGACTCA	37	CCCAGCCTGGCACATTAGTAGGCCTCAGTAAATGTTTATTAGATGAATAAATGAATGACTCATCAGCAAACATTTATTGTGTGCCTGCTAAAGTGAGCTCCACAGG
hsa-mir-545	chrX	-	73506938	73507043	hsa-mir-545*	hsa-mir-545*	mature	0.29	Y	73506998	73507019	TCAGTAAATGTTTATTAGATGA	74	CCCAGCCTGGCACATTAGTAGGCCTCAGTAAATGTTTATTAGATGAATAAATGAATGACTCATCAGCAAACATTTATTGTGTGCCTGCTAAAGTGAGCTCCACAGG
hsa-mir-545	chrX	-	73506938	73507043	hsa-mir-545*	hsa-mir-545*_-1_3	mature	0.12		73506999	73507019	TCAGTAAATGTTTATTAGATG	33	CCCAGCCTGGCACATTAGTAGGCCTCAGTAAATGTTTATTAGATGAATAAATGAATGACTCATCAGCAAACATTTATTGTGTGCCTGCTAAAGTGAGCTCCACAGG
hsa-mir-548a-1	chr6	+	18572014	18572110	hsa-mir-548a-1-3p	hsa-mir-548a-1-3p_-2_3	mature	0.15		18572074	18572093	CAAAACTGGCAATTACTTTT	152	TGCAGGGAGGTATTAAGTTGGTGCAAAAGTAATTGTGATTTTTGCCATTAAAAGTAACGACAAAACTGGCAATTACTTTTGCACCAAACCTGGTATT
hsa-mir-548a-1	chr6	+	18572014	18572110	hsa-mir-548a-1-3p	hsa-mir-548a-1-3p_-1_3	mature	0.57		18572074	18572094	CAAAACTGGCAATTACTTTTG	576	TGCAGGGAGGTATTAAGTTGGTGCAAAAGTAATTGTGATTTTTGCCATTAAAAGTAACGACAAAACTGGCAATTACTTTTGCACCAAACCTGGTATT
hsa-mir-548a-1	chr6	+	18572014	18572110	hsa-mir-548a-1-3p	hsa-mir-548a-1-3p	mature	0.21	Y	18572074	18572095	CAAAACTGGCAATTACTTTTGC	213	TGCAGGGAGGTATTAAGTTGGTGCAAAAGTAATTGTGATTTTTGCCATTAAAAGTAACGACAAAACTGGCAATTACTTTTGCACCAAACCTGGTATT
hsa-mir-548a-2	chr6	+	135560297	135560393	hsa-mir-548a-2-3p	hsa-mir-548a-2-3p_-2_3	mature	0.14		135560357	135560376	CAAAACTGGCAATTACTTTT	152	TGTGATGTGTATTAGGTTTGTGCAAAAGTAATTGGGGTTTTTTGCCGTTAAAAGTAATGGCAAAACTGGCAATTACTTTTGCACCAAACTAATATAA
hsa-mir-548a-2	chr6	+	135560297	135560393	hsa-mir-548a-2-3p	hsa-mir-548a-2-3p_-1_3	mature	0.56		135560357	135560377	CAAAACTGGCAATTACTTTTG	576	TGTGATGTGTATTAGGTTTGTGCAAAAGTAATTGGGGTTTTTTGCCGTTAAAAGTAATGGCAAAACTGGCAATTACTTTTGCACCAAACTAATATAA
hsa-mir-548a-2	chr6	+	135560297	135560393	hsa-mir-548a-2-3p	hsa-mir-548a-2-3p	mature	0.2	Y	135560357	135560378	CAAAACTGGCAATTACTTTTGC	213	TGTGATGTGTATTAGGTTTGTGCAAAAGTAATTGGGGTTTTTTGCCGTTAAAAGTAATGGCAAAACTGGCAATTACTTTTGCACCAAACTAATATAA
hsa-mir-548a-3	chr8	-	105496596	105496692	hsa-mir-548a-3-3p	hsa-mir-548a-3-3p	mature	0.16	Y	105496611	105496632	CAAAACTGGCAATTACTTTTGC	213	CCTAGAATGTTATTAGGTCGGTGCAAAAGTAATTGCGAGTTTTACCATTACTTTCAATGGCAAAACTGGCAATTACTTTTGCACCAACGTAATACTT
hsa-mir-548a-3	chr8	-	105496596	105496692	hsa-mir-548a-3-3p	hsa-mir-548a-3-3p_-1_3	mature	0.43		105496612	105496632	CAAAACTGGCAATTACTTTTG	576	CCTAGAATGTTATTAGGTCGGTGCAAAAGTAATTGCGAGTTTTACCATTACTTTCAATGGCAAAACTGGCAATTACTTTTGCACCAACGTAATACTT
hsa-mir-548a-3	chr8	-	105496596	105496692	hsa-mir-548a-3-3p	hsa-mir-548a-3-3p_-2_3	mature	0.11		105496613	105496632	CAAAACTGGCAATTACTTTT	152	CCTAGAATGTTATTAGGTCGGTGCAAAAGTAATTGCGAGTTTTACCATTACTTTCAATGGCAAAACTGGCAATTACTTTTGCACCAACGTAATACTT
hsa-mir-548a-3	chr8	-	105496596	105496692	hsa-mir-548a-3-5p	hsa-mir-548a-3-5p	mature	0.08	Y	105496647	105496668	AAAAGTAATTGCGAGTTTTACC	116	CCTAGAATGTTATTAGGTCGGTGCAAAAGTAATTGCGAGTTTTACCATTACTTTCAATGGCAAAACTGGCAATTACTTTTGCACCAACGTAATACTT
hsa-mir-548c	chr12	+	65016288	65016384	hsa-mir-548c-3p	hsa-mir-548c-3p_-2_3	mature	0.33		65016348	65016367	CAAAAATCTCAATTACTTTT	15	CATTGGCATCTATTAGGTTGGTGCAAAAGTAATTGCGGTTTTTGCCATTACTTTCAGTAGCAAAAATCTCAATTACTTTTGCACCAACTTAATACTT
hsa-mir-548c	chr12	+	65016288	65016384	hsa-mir-548c-3p	hsa-mir-548c-3p_-1_3	mature	0.24		65016348	65016368	CAAAAATCTCAATTACTTTTG	11	CATTGGCATCTATTAGGTTGGTGCAAAAGTAATTGCGGTTTTTGCCATTACTTTCAGTAGCAAAAATCTCAATTACTTTTGCACCAACTTAATACTT
hsa-mir-548c	chr12	+	65016288	65016384	hsa-mir-548c-3p	hsa-mir-548c-3p	mature	0.28	Y	65016348	65016369	CAAAAATCTCAATTACTTTTGC	13	CATTGGCATCTATTAGGTTGGTGCAAAAGTAATTGCGGTTTTTGCCATTACTTTCAGTAGCAAAAATCTCAATTACTTTTGCACCAACTTAATACTT
hsa-mir-548c	chr12	+	65016288	65016384	hsa-mir-548c-3p	hsa-mir-548c-3p_-1_5	mature	0.11		65016349	65016369	AAAAATCTCAATTACTTTTGC	5	CATTGGCATCTATTAGGTTGGTGCAAAAGTAATTGCGGTTTTTGCCATTACTTTCAGTAGCAAAAATCTCAATTACTTTTGCACCAACTTAATACTT
hsa-mir-548d-1	chr8	-	124360273	124360369	hsa-mir-548d-1-3p	hsa-mir-548d-1-3p	mature	0.34	Y	124360288	124360309	CAAAAACCACAGTTTCTTTTGC	191	AAACAAGTTATATTAGGTTGGTGCAAAAGTAATTGTGGTTTTTGCCTGTAAAAGTAATGGCAAAAACCACAGTTTCTTTTGCACCAGACTAATAAAG
hsa-mir-548d-1	chr8	-	124360273	124360369	hsa-mir-548d-1	hsa-mir-548d-1_other1	other	0.39		124360309	124360324	CTGTAAAAGTAATGGC	220	AAACAAGTTATATTAGGTTGGTGCAAAAGTAATTGTGGTTTTTGCCTGTAAAAGTAATGGCAAAAACCACAGTTTCTTTTGCACCAGACTAATAAAG
hsa-mir-548d-2	chr17	-	65467604	65467700	hsa-mir-548d-2-3p	hsa-mir-548d-2-3p_-1_5	mature	0.12		65467619	65467639	AAAAACCACAGTTTCTTTTGC	38	GAGAGGGAAGATTTAGGTTGGTGCAAAAGTAATTGTGGTTTTTGCCATTGAAAGTAATGGCAAAAACCACAGTTTCTTTTGCACCAACCTAATAAAA
hsa-mir-548d-2	chr17	-	65467604	65467700	hsa-mir-548d-2-3p	hsa-mir-548d-2-3p	mature	0.64	Y	65467619	65467640	CAAAAACCACAGTTTCTTTTGC	191	GAGAGGGAAGATTTAGGTTGGTGCAAAAGTAATTGTGGTTTTTGCCATTGAAAGTAATGGCAAAAACCACAGTTTCTTTTGCACCAACCTAATAAAA
hsa-mir-548e	chr10	+	112748683	112748770	hsa-mir-548e	hsa-mir-548e_-1_3	mature	0.4		112748735	112748755	AAAAACTGAGACTACTTTTGC	501	TTATTAGGTTGGTACAAAAGCAATCGCGGTTTTTGCTATTACTTTTAAAGGCAAAAACTGAGACTACTTTTGCACCAACCTGATAGAA
hsa-mir-548e	chr10	+	112748683	112748770	hsa-mir-548e	hsa-mir-548e	mature	0.37	Y	112748735	112748756	AAAAACTGAGACTACTTTTGCA	466	TTATTAGGTTGGTACAAAAGCAATCGCGGTTTTTGCTATTACTTTTAAAGGCAAAAACTGAGACTACTTTTGCACCAACCTGATAGAA
hsa-mir-548f-1	chr10	-	56367633	56367716	hsa-mir-548f-1	hsa-mir-548f-1_other1	other	0.16		56367642	56367664	AAACTGTAATTACTTTTGGACCA	68	ATTAGGTTGGTGCAAAAGTAATCACAGTTTTTGACATTACTTTCAAAGACAAAAACTGTAATTACTTTTGGACCAACCTAATAG
hsa-mir-548f-1	chr10	-	56367633	56367716	hsa-mir-548f-1	hsa-mir-548f-1_other2	other	0.49		56367643	56367664	AAACTGTAATTACTTTTGGACC	205	ATTAGGTTGGTGCAAAAGTAATCACAGTTTTTGACATTACTTTCAAAGACAAAAACTGTAATTACTTTTGGACCAACCTAATAG
hsa-mir-548f-2	chr2	-	213290986	213291083	hsa-mir-548f-2	hsa-mir-548f-2_other1	other	0.98		213291005	213291026	CAAAAACTGTAATTACTTTTGC	142	TAATAACTATTAGGTTGGTGCGAACATAATTGCAGTTTTTATCATTACTTTTAATGGCAAAAACTGTAATTACTTTTGCACCAACCTAATATTTTAGT
hsa-mir-548f-3	chr5	-	109849529	109849615	hsa-mir-548f-3	hsa-mir-548f-3_other1	other	0.98		109849542	109849563	CAAAAACTGTAATTACTTTTGC	142	ATTAGGTTGGTGCAAACCTAATTGCAATTTTTGCAGTTTTTTTAAGTAATTGCAAAAACTGTAATTACTTTTGCACCAACCTAATAC
hsa-mir-548f-4	chr7	-	147075108	147075212	hsa-mir-548f-4	hsa-mir-548f-4_other1	other	0.5		147075129	147075150	AAAAACTGTAATTACTTTTGGA	15	GAGTTCTAACGTATTAGGTTGGTGCAAAAGTAATAGTGGTTTTTGCCATTAAAAGTAATGACAAAAACTGTAATTACTTTTGGAACAATATTAATAGAATTTCAG
hsa-mir-548f-4	chr7	-	147075108	147075212	hsa-mir-548f-4-star	hsa-mir-548f-4-star_+2_5	star	0.1		147075167	147075187	AAAAGTAATAGTGGTTTTTGC	3	GAGTTCTAACGTATTAGGTTGGTGCAAAAGTAATAGTGGTTTTTGCCATTAAAAGTAATGACAAAAACTGTAATTACTTTTGGAACAATATTAATAGAATTTCAG
hsa-mir-548h-2	chr16	-	11400296	11400383	hsa-mir-548h-2	hsa-mir-548h-2_other1	other	0.58		11400306	11400328	CACCACAATTACTTTTGCACCAA	7	GTATTAGGTTGGTGCAAAAGTAATCGCGGTTTTTGTCATTACTTTCAATGGCAAACACCACAATTACTTTTGCACCAACCTAATATAA
hsa-mir-548i-1	chr3	-	125509246	125509394	hsa-mir-548i-1	hsa-mir-548i-1	mature	0.97	Y	125509335	125509356	AAAAGTAATTGCGGATTTTGCC	40	CAGATGGCTCTGAAGTTTGCACCCTATTAGGTTGGTGCAAAAGTAATTGCGGATTTTGCCATTAAAAGTAATGGCAAAAATAGCAATTATTTTTGTACCAGCCTAGTATCTTTTCTCCTTCTACCAAACTTTGTCCCTGAGCCATCTCA
hsa-mir-548i-2	chr4	-	9557788	9557936	hsa-mir-548i-2	hsa-mir-548i-2	mature	0.97	Y	9557877	9557898	AAAAGTAATTGCGGATTTTGCC	40	TAGATGGCTCCGAAGTTTGCATCCTATTAGTTTGGTGCAAAAGTAATTGCGGATTTTGCCATTAAAAGTAATGGCAAAAATAGCAATTATTTTTGTACCAGCCTAGTATCTTTTCTCCTTCTAACAAAGTTCGTCCCTGATCCATCTCA
hsa-mir-548i-3	chr8	-	7946462	7946610	hsa-mir-548i-3	hsa-mir-548i-3	mature	0.97	Y	7946551	7946572	AAAAGTAATTGCGGATTTTGCC	40	CAGATGGCTCCGAAGTTTACATCCTATTAGGTTTGTGCAAAAGTAATTGCGGATTTTGCCATTAAAAGTAATGGCAAAAATAGCAATTATTTTTGTACCAGCCTAGTATCTTTTCTCCTTCTACCAAACTTTGTCCCTGAGCCATCTCA
hsa-mir-548i-4	chrX	-	83480759	83480835	hsa-mir-548i-4	hsa-mir-548i-4	mature	0.97	Y	83480804	83480825	AAAAGTAATTGCGGATTTTGCC	40	AGGTTGGTGCAAAAGTAATTGCGGATTTTGCCATACTTTTAACGGCAAAAACCACAAATATTATTGCACCAACCTAT
hsa-mir-548j	chr22	-	26951177	26951288	hsa-mir-548j	hsa-mir-548j	mature	0.54	Y	26951239	26951260	AAAAGTAATTGCGGTCTTTGGT	57	GGGCAGCCAGTGAATAGTTAGCTGGTGCAAAAGTAATTGCGGTCTTTGGTATTACTTTCAGTGGCAAAAACTGCATTACTTTTGCACCAGCCTACTAGAACGCTGAGTTCAG
hsa-mir-548j	chr22	-	26951177	26951288	hsa-mir-548j	hsa-mir-548j_+1_5	mature	0.23		26951239	26951261	CAAAAGTAATTGCGGTCTTTGGT	24	GGGCAGCCAGTGAATAGTTAGCTGGTGCAAAAGTAATTGCGGTCTTTGGTATTACTTTCAGTGGCAAAAACTGCATTACTTTTGCACCAGCCTACTAGAACGCTGAGTTCAG
hsa-mir-548k	chr11	+	70130060	70130175	hsa-mir-548k	hsa-mir-548k_-1_3	mature	0.14		70130091	70130111	AAAAGTACTTGCGGATTTTGC	71	CTTTTCTCAAGTATTGCTGTTAGGTTGGTGCAAAAGTACTTGCGGATTTTGCTTTACTTTTAATGGCAAAAACCGCAATTATTTTTGCTTCAACCTAATATGATGCAAAATTGGCT
hsa-mir-548k	chr11	+	70130060	70130175	hsa-mir-548k	hsa-mir-548k	mature	0.74	Y	70130091	70130112	AAAAGTACTTGCGGATTTTGCT	358	CTTTTCTCAAGTATTGCTGTTAGGTTGGTGCAAAAGTACTTGCGGATTTTGCTTTACTTTTAATGGCAAAAACCGCAATTATTTTTGCTTCAACCTAATATGATGCAAAATTGGCT
hsa-mir-548l	chr11	-	94199660	94199745	hsa-mir-548l	hsa-mir-548l	mature	0.67	Y	94199710	94199731	AAAAGTATTTGCGGGTTTTGTC	29	TATTAGGTTGGTGCAAAAGTATTTGCGGGTTTTGTCGTAGAAAGTAATGGCAAAAACTGCAGTTACTTGTGCACCAACCAAATGCT
hsa-mir-548l	chr11	-	94199660	94199745	hsa-mir-548l	hsa-mir-548l_-1_3	mature	0.23		94199711	94199731	AAAAGTATTTGCGGGTTTTGT	10	TATTAGGTTGGTGCAAAAGTATTTGCGGGTTTTGTCGTAGAAAGTAATGGCAAAAACTGCAGTTACTTGTGCACCAACCAAATGCT
hsa-mir-548n	chr7	-	34980371	34980445	hsa-mir-548n	hsa-mir-548n_+1_3_-1_5	mature	0.29		34980414	34980435	AAAAGTAATTGTGGATTTTGTC	117	AGGTTGGTGCAAAAGTAATTGTGGATTTTGTCGTTAAAAATAGCAAAACCCGCAATTACTTTTGCACCAACCTAA
hsa-mir-548n	chr7	-	34980371	34980445	hsa-mir-548n	hsa-mir-548n_-1_5	mature	0.22		34980415	34980435	AAAAGTAATTGTGGATTTTGT	91	AGGTTGGTGCAAAAGTAATTGTGGATTTTGTCGTTAAAAATAGCAAAACCCGCAATTACTTTTGCACCAACCTAA
hsa-mir-548n	chr7	-	34980371	34980445	hsa-mir-548n	hsa-mir-548n	mature	0.34	Y	34980415	34980436	CAAAAGTAATTGTGGATTTTGT	137	AGGTTGGTGCAAAAGTAATTGTGGATTTTGTCGTTAAAAATAGCAAAACCCGCAATTACTTTTGCACCAACCTAA
hsa-mir-548o	chr7	-	102046188	102046301	hsa-mir-548o	hsa-mir-548o	mature	0.64	Y	102046194	102046215	CCAAAACTGCAGTTACTTTTGC	169	TGGTGAAAATGTGTTGATTGTAATGGTTCCTATTCTGATCAATAAACATGGTTTGAGCCTAGTTACAATGATCTAAAATTCACGGTCCAAAACTGCAGTTACTTTTGCACCAAC
hsa-mir-548o	chr7	-	102046188	102046301	hsa-mir-548o	hsa-mir-548o_-1_3	mature	0.29		102046195	102046215	CCAAAACTGCAGTTACTTTTG	76	TGGTGAAAATGTGTTGATTGTAATGGTTCCTATTCTGATCAATAAACATGGTTTGAGCCTAGTTACAATGATCTAAAATTCACGGTCCAAAACTGCAGTTACTTTTGCACCAAC
hsa-mir-548p	chr5	-	100152185	100152268	hsa-mir-548p	hsa-mir-548p	mature	0.09	Y	100152201	100152222	TAGCAAAAACTGCAGTTACTTT	3	ATTAGGTTGGTATAAAATTAATTGCAGTTTTTGTCATTACTTTCAATAGCAAAAACTGCAGTTACTTTTGCACCAATGTAATAC
hsa-mir-548p	chr5	-	100152185	100152268	hsa-mir-548p	hsa-mir-548p_-1_3	mature	0.22		100152202	100152222	TAGCAAAAACTGCAGTTACTT	7	ATTAGGTTGGTATAAAATTAATTGCAGTTTTTGTCATTACTTTCAATAGCAAAAACTGCAGTTACTTTTGCACCAATGTAATAC
hsa-mir-548p	chr5	-	100152185	100152268	hsa-mir-548p	hsa-mir-548p_other1	other	0.51		100152235	100152256	TAAAATTAATTGCAGTTTTTGT	16	ATTAGGTTGGTATAAAATTAATTGCAGTTTTTGTCATTACTTTCAATAGCAAAAACTGCAGTTACTTTTGCACCAATGTAATAC
hsa-mir-548q	chr10	-	12767252	12767351	hsa-mir-548q	hsa-mir-548q_other1	other	0.16		12767316	12767336	AAAAGTAATGGCGGTTTTTGC	13	ATATTAGGCTGGTGCAAAAGTAATGGCGGTTTTTGCCATTACTTTTCATTTTTACCATTAAAAGTAATGGCAAAAAGCATGATTACTTTTTCACCAACCT
hsa-mir-548q	chr10	-	12767252	12767351	hsa-mir-548q	hsa-mir-548q_other2	other	0.16		12767316	12767337	CAAAAGTAATGGCGGTTTTTGC	13	ATATTAGGCTGGTGCAAAAGTAATGGCGGTTTTTGCCATTACTTTTCATTTTTACCATTAAAAGTAATGGCAAAAAGCATGATTACTTTTTCACCAACCT
hsa-mir-548q	chr10	-	12767252	12767351	hsa-mir-548q	hsa-mir-548q_other3	other	0.14		12767317	12767337	CAAAAGTAATGGCGGTTTTTG	12	ATATTAGGCTGGTGCAAAAGTAATGGCGGTTTTTGCCATTACTTTTCATTTTTACCATTAAAAGTAATGGCAAAAAGCATGATTACTTTTTCACCAACCT
hsa-mir-548q	chr10	-	12767252	12767351	hsa-mir-548q	hsa-mir-548q	mature	0.02	Y	12767323	12767344	GCTGGTGCAAAAGTAATGGCGG	2	ATATTAGGCTGGTGCAAAAGTAATGGCGGTTTTTGCCATTACTTTTCATTTTTACCATTAAAAGTAATGGCAAAAAGCATGATTACTTTTTCACCAACCT
hsa-mir-548s	chr2	+	11907569	11907650	hsa-mir-548s	hsa-mir-548s_other1	other	0.3		11907618	11907639	TAATGGCCAAAACTGCAGTTAT	73	TTGCTGCAAAAATAATTGCAGTTTTTGCCATTATTTTTAATAATTATAATAATGGCCAAAACTGCAGTTATTTTTGCACCAA
hsa-mir-548s	chr2	+	11907569	11907650	hsa-mir-548s	hsa-mir-548s_-1_3	mature	0.35		11907620	11907641	ATGGCCAAAACTGCAGTTATTT	84	TTGCTGCAAAAATAATTGCAGTTTTTGCCATTATTTTTAATAATTATAATAATGGCCAAAACTGCAGTTATTTTTGCACCAA
hsa-mir-548t	chr4	+	174189310	174189383	hsa-mir-548t	hsa-mir-548t_-1_3_+2_5	mature	0.18		174189317	174189338	TGCAAAAGTGATCGTGGTTTTT	4	AGGGTGGTGCAAAAGTGATCGTGGTTTTTGCAATTTTTTAATGACAAAAACCACAATTACTTTTGCACCAACCT
hsa-mir-548t	chr4	+	174189310	174189383	hsa-mir-548t	hsa-mir-548t	mature	0.22	Y	174189319	174189339	CAAAAGTGATCGTGGTTTTTG	5	AGGGTGGTGCAAAAGTGATCGTGGTTTTTGCAATTTTTTAATGACAAAAACCACAATTACTTTTGCACCAACCT
hsa-mir-548t	chr4	+	174189310	174189383	hsa-mir-548t	hsa-mir-548t_+1_3	mature	0.5		174189319	174189340	CAAAAGTGATCGTGGTTTTTGC	11	AGGGTGGTGCAAAAGTGATCGTGGTTTTTGCAATTTTTTAATGACAAAAACCACAATTACTTTTGCACCAACCT
hsa-mir-548u	chr6	+	57254929	57255009	hsa-mir-548u-star	hsa-mir-548u-star_-1_3	star	0.15		57254941	57254961	CAAAAGTAATGTGGTTTTTTT	3	ATTAGGATGGTGCAAAAGTAATGTGGTTTTTTTCTTTACTTTTAATGGCAAAGACTGCAATTACTTTTGCGCCAACCTAAT
hsa-mir-548u	chr6	+	57254929	57255009	hsa-mir-548u-star	hsa-mir-548u-star	star	0.35		57254941	57254962	CAAAAGTAATGTGGTTTTTTTC	7	ATTAGGATGGTGCAAAAGTAATGTGGTTTTTTTCTTTACTTTTAATGGCAAAGACTGCAATTACTTTTGCGCCAACCTAAT
hsa-mir-548u	chr6	+	57254929	57255009	hsa-mir-548u	hsa-mir-548u_-1_3	mature	0.35		57254977	57254998	CAAAGACTGCAATTACTTTTGC	7	ATTAGGATGGTGCAAAAGTAATGTGGTTTTTTTCTTTACTTTTAATGGCAAAGACTGCAATTACTTTTGCGCCAACCTAAT
hsa-mir-548u	chr6	+	57254929	57255009	hsa-mir-548u	hsa-mir-548u	mature	0.05	Y	57254977	57254999	CAAAGACTGCAATTACTTTTGCG	1	ATTAGGATGGTGCAAAAGTAATGTGGTTTTTTTCTTTACTTTTAATGGCAAAGACTGCAATTACTTTTGCGCCAACCTAAT
hsa-mir-548v	chr8	-	17539086	17539165	hsa-mir-548v	hsa-mir-548v	mature	0.35	Y	17539096	17539117	AGCTACAGTTACTTTTGCACCA	325	AATACTAGGTTTGAGCAAAAGTAATTGCGGTTTTGCCATCATGCCAAAAGCTACAGTTACTTTTGCACCAGCCTAATATT
hsa-mir-548v	chr8	-	17539086	17539165	hsa-mir-548v-star	hsa-mir-548v-star	star	0.29		17539132	17539153	GAGCAAAAGTAATTGCGGTTTT	269	AATACTAGGTTTGAGCAAAAGTAATTGCGGTTTTGCCATCATGCCAAAAGCTACAGTTACTTTTGCACCAGCCTAATATT
hsa-mir-550a-1	chr7	+	30329409	30329505	hsa-mir-550a-1	hsa-mir-550a-1	mature	0.01	Y	30329430	30329452	AGTGCCTGAGGGAGTAAGAGCCC	78	TGATGCTTTGCTGGCTGGTGCAGTGCCTGAGGGAGTAAGAGCCCTGTTGTTGTAAGATAGTGTCTTACTCCCTCAGGCACATCTCCAACAAGTCTCT
hsa-mir-550a-1	chr7	+	30329409	30329505	hsa-mir-550a-1*	hsa-mir-550a-1*_-1_3	mature	0.1		30329469	30329489	TGTCTTACTCCCTCAGGCACA	739	TGATGCTTTGCTGGCTGGTGCAGTGCCTGAGGGAGTAAGAGCCCTGTTGTTGTAAGATAGTGTCTTACTCCCTCAGGCACATCTCCAACAAGTCTCT
hsa-mir-550a-1	chr7	+	30329409	30329505	hsa-mir-550a-1*	hsa-mir-550a-1*	mature	0.58	Y	30329469	30329490	TGTCTTACTCCCTCAGGCACAT	4068	TGATGCTTTGCTGGCTGGTGCAGTGCCTGAGGGAGTAAGAGCCCTGTTGTTGTAAGATAGTGTCTTACTCCCTCAGGCACATCTCCAACAAGTCTCT
hsa-mir-550a-2	chr7	+	32772592	32772688	hsa-mir-550a-2	hsa-mir-550a-2	mature	0.01	Y	32772613	32772635	AGTGCCTGAGGGAGTAAGAGCCC	78	TGATGCTTTGCTGGCTGGTGCAGTGCCTGAGGGAGTAAGAGCCCTGTTGTTGTCAGATAGTGTCTTACTCCCTCAGGCACATCTCCAGCGAGTCTCT
hsa-mir-550a-2	chr7	+	32772592	32772688	hsa-mir-550a-2*	hsa-mir-550a-2*_-1_3	mature	0.1		32772652	32772672	TGTCTTACTCCCTCAGGCACA	739	TGATGCTTTGCTGGCTGGTGCAGTGCCTGAGGGAGTAAGAGCCCTGTTGTTGTCAGATAGTGTCTTACTCCCTCAGGCACATCTCCAGCGAGTCTCT
hsa-mir-550a-2	chr7	+	32772592	32772688	hsa-mir-550a-2*	hsa-mir-550a-2*	mature	0.58	Y	32772652	32772673	TGTCTTACTCCCTCAGGCACAT	4068	TGATGCTTTGCTGGCTGGTGCAGTGCCTGAGGGAGTAAGAGCCCTGTTGTTGTCAGATAGTGTCTTACTCCCTCAGGCACATCTCCAGCGAGTCTCT
hsa-mir-550b-1	chr7	-	30329409	30329505	hsa-mir-550b-1	hsa-mir-550b-1_-2_3	mature	0.77		30329431	30329448	TCTTACTCCCTCAGGCAC	7	AGAGACTTGTTGGAGATGTGCCTGAGGGAGTAAGACACTATCTTACAACAACAGGGCTCTTACTCCCTCAGGCACTGCACCAGCCAGCAAAGCATCA
hsa-mir-550b-1	chr7	-	30329409	30329505	hsa-mir-550b-1-star	hsa-mir-550b-1-star_-2_3_-1_5	star	0.22		30329471	30329487	TGCCTGAGGGAGTAAGA	2	AGAGACTTGTTGGAGATGTGCCTGAGGGAGTAAGACACTATCTTACAACAACAGGGCTCTTACTCCCTCAGGCACTGCACCAGCCAGCAAAGCATCA
hsa-mir-550b-2	chr7	-	32772592	32772688	hsa-mir-550b-2	hsa-mir-550b-2_-2_3	mature	0.77		32772614	32772631	TCTTACTCCCTCAGGCAC	7	AGAGACTCGCTGGAGATGTGCCTGAGGGAGTAAGACACTATCTGACAACAACAGGGCTCTTACTCCCTCAGGCACTGCACCAGCCAGCAAAGCATCA
hsa-mir-550b-2	chr7	-	32772592	32772688	hsa-mir-550b-2-star	hsa-mir-550b-2-star_-2_3_-1_5	star	0.22		32772654	32772670	TGCCTGAGGGAGTAAGA	2	AGAGACTCGCTGGAGATGTGCCTGAGGGAGTAAGACACTATCTGACAACAACAGGGCTCTTACTCCCTCAGGCACTGCACCAGCCAGCAAAGCATCA
hsa-mir-551a	chr1	-	3477258	3477353	hsa-mir-551a	hsa-mir-551a	mature	0.47	Y	3477273	3477293	GCGACCCACTCTTGGTTTCCA	50	GGGGACTGCCGGGTGACCCTGGAAATCCAGAGTGGGTGGGGCCAGTCTGACCGTTTCTAGGCGACCCACTCTTGGTTTCCAGGGTTGCCCTGGAAA
hsa-mir-551a	chr1	-	3477258	3477353	hsa-mir-551a	hsa-mir-551a_-1_3	mature	0.19		3477274	3477293	GCGACCCACTCTTGGTTTCC	21	GGGGACTGCCGGGTGACCCTGGAAATCCAGAGTGGGTGGGGCCAGTCTGACCGTTTCTAGGCGACCCACTCTTGGTTTCCAGGGTTGCCCTGGAAA
hsa-mir-551a	chr1	-	3477258	3477353	hsa-mir-551a	hsa-mir-551a_-2_3	mature	0.1		3477275	3477293	GCGACCCACTCTTGGTTTC	11	GGGGACTGCCGGGTGACCCTGGAAATCCAGAGTGGGTGGGGCCAGTCTGACCGTTTCTAGGCGACCCACTCTTGGTTTCCAGGGTTGCCCTGGAAA
hsa-mir-551b	chr3	+	168269641	168269736	hsa-mir-551b	hsa-mir-551b	mature	0.63	Y	168269701	168269721	GCGACCCATACTTGGTTTCAG	7	AGATGTGCTCTCCTGGCCCATGAAATCAAGCGTGGGTGAGACCTGGTGCAGAACGGGAAGGCGACCCATACTTGGTTTCAGAGGCTGTGAGAATAA
hsa-mir-552	chr1	-	35135199	35135294	hsa-mir-552	hsa-mir-552_+1_3	mature	0.11		35135213	35135234	AACAGGTGACTGGTTAGACAAA	1	AACCATTCAAATATACCACAGTTTGTTTAACCTTTTGCCTGTTGGTTGAAGATGCCTTTCAACAGGTGACTGGTTAGACAAACTGTGGTATATACA
hsa-mir-552	chr1	-	35135199	35135294	hsa-mir-552-star	hsa-mir-552-star_+1_5	star	0.44		35135250	35135271	TGTTTAACCTTTTGCCTGTTGG	4	AACCATTCAAATATACCACAGTTTGTTTAACCTTTTGCCTGTTGGTTGAAGATGCCTTTCAACAGGTGACTGGTTAGACAAACTGTGGTATATACA
hsa-mir-552	chr1	-	35135199	35135294	hsa-mir-552-star	hsa-mir-552-star_-1_3_+1_5	star	0.33		35135251	35135271	TGTTTAACCTTTTGCCTGTTG	3	AACCATTCAAATATACCACAGTTTGTTTAACCTTTTGCCTGTTGGTTGAAGATGCCTTTCAACAGGTGACTGGTTAGACAAACTGTGGTATATACA
hsa-mir-552	chr1	-	35135199	35135294	hsa-mir-552-star	hsa-mir-552-star_-2_3_+1_5	star	0.11		35135252	35135271	TGTTTAACCTTTTGCCTGTT	1	AACCATTCAAATATACCACAGTTTGTTTAACCTTTTGCCTGTTGGTTGAAGATGCCTTTCAACAGGTGACTGGTTAGACAAACTGTGGTATATACA
hsa-mir-556	chr1	+	162312335	162312429	hsa-mir-556-5p	hsa-mir-556-5p	mature	0.01	Y	162312350	162312371	GATGAGCTCATTGTAATATGAG	20	GATAGTAATAAGAAAGATGAGCTCATTGTAATATGAGCTTCATTTATACATTTCATATTACCATTAGCTCATCTTTTTTATTACTACCTTCAACA
hsa-mir-556	chr1	+	162312335	162312429	hsa-mir-556-3p	hsa-mir-556-3p_-2_3	mature	0.11		162312389	162312408	ATATTACCATTAGCTCATCT	119	GATAGTAATAAGAAAGATGAGCTCATTGTAATATGAGCTTCATTTATACATTTCATATTACCATTAGCTCATCTTTTTTATTACTACCTTCAACA
hsa-mir-556	chr1	+	162312335	162312429	hsa-mir-556-3p	hsa-mir-556-3p_-1_3	mature	0.63		162312389	162312409	ATATTACCATTAGCTCATCTT	645	GATAGTAATAAGAAAGATGAGCTCATTGTAATATGAGCTTCATTTATACATTTCATATTACCATTAGCTCATCTTTTTTATTACTACCTTCAACA
hsa-mir-556	chr1	+	162312335	162312429	hsa-mir-556-3p	hsa-mir-556-3p	mature	0.04	Y	162312389	162312410	ATATTACCATTAGCTCATCTTT	50	GATAGTAATAAGAAAGATGAGCTCATTGTAATATGAGCTTCATTTATACATTTCATATTACCATTAGCTCATCTTTTTTATTACTACCTTCAACA
hsa-mir-559	chr2	+	47604813	47604908	hsa-mir-559	hsa-mir-559	mature	0.06	Y	47604828	47604848	TAAAGTAAATATGCACCAAAA	56	GCTCCAGTAACATCTTAAAGTAAATATGCACCAAAATTACTTTTGGTAAATACAGTTTTGGTGCATATTTACTTTAGGATGTTACTGGAGCTCCCA
hsa-mir-559	chr2	+	47604813	47604908	hsa-mir-559	hsa-mir-559_+1_3	mature	0.43		47604828	47604849	TAAAGTAAATATGCACCAAAAT	354	GCTCCAGTAACATCTTAAAGTAAATATGCACCAAAATTACTTTTGGTAAATACAGTTTTGGTGCATATTTACTTTAGGATGTTACTGGAGCTCCCA
hsa-mir-559	chr2	+	47604813	47604908	hsa-mir-559-star	hsa-mir-559-star_+1_5	star	0.16		47604869	47604890	TTTGGTGCATATTTACTTTAGG	135	GCTCCAGTAACATCTTAAAGTAAATATGCACCAAAATTACTTTTGGTAAATACAGTTTTGGTGCATATTTACTTTAGGATGTTACTGGAGCTCCCA
hsa-mir-570	chr3	+	195426271	195426367	hsa-mir-570-star	hsa-mir-570-star_-3_3	star	0.17		195426295	195426314	AAAGGTAATTGCAGTTTTTC	32	CTAGATAAGTTATTAGGTGGGTGCAAAGGTAATTGCAGTTTTTCCCATTATTTTAATTGCGAAAACAGCAATTACCTTTGCACCAACCTGATGGAGT
hsa-mir-570	chr3	+	195426271	195426367	hsa-mir-570	hsa-mir-570_-1_3	mature	0.27		195426330	195426350	CGAAAACAGCAATTACCTTTG	50	CTAGATAAGTTATTAGGTGGGTGCAAAGGTAATTGCAGTTTTTCCCATTATTTTAATTGCGAAAACAGCAATTACCTTTGCACCAACCTGATGGAGT
hsa-mir-570	chr3	+	195426271	195426367	hsa-mir-570	hsa-mir-570	mature	0.16	Y	195426330	195426351	CGAAAACAGCAATTACCTTTGC	31	CTAGATAAGTTATTAGGTGGGTGCAAAGGTAATTGCAGTTTTTCCCATTATTTTAATTGCGAAAACAGCAATTACCTTTGCACCAACCTGATGGAGT
hsa-mir-573	chr4	-	24521814	24521912	hsa-mir-573	hsa-mir-573_+1_3	mature	0.57		24521873	24521897	CTGAAGTGATGTGTAACTGATCAGG	4	TTTAGCGGTTTCTCCCTGAAGTGATGTGTAACTGATCAGGATCTACTCATGTCGTCTTTGGTAAAGTTATGTCGCTTGTCAGGGTGAGGAGAGTTTTTG
hsa-mir-573	chr4	-	24521814	24521912	hsa-mir-573	hsa-mir-573_-1_5	mature	0.14		24521874	24521896	TGAAGTGATGTGTAACTGATCAG	1	TTTAGCGGTTTCTCCCTGAAGTGATGTGTAACTGATCAGGATCTACTCATGTCGTCTTTGGTAAAGTTATGTCGCTTGTCAGGGTGAGGAGAGTTTTTG
hsa-mir-573	chr4	-	24521814	24521912	hsa-mir-573	hsa-mir-573	mature	0.28	Y	24521874	24521897	CTGAAGTGATGTGTAACTGATCAG	2	TTTAGCGGTTTCTCCCTGAAGTGATGTGTAACTGATCAGGATCTACTCATGTCGTCTTTGGTAAAGTTATGTCGCTTGTCAGGGTGAGGAGAGTTTTTG
hsa-mir-574	chr4	+	38869652	38869747	hsa-mir-574-3p	hsa-mir-574-3p_-2_3	mature	0.11		38869712	38869731	CACGCTCATGCACACACCCA	735	GGGACCTGCGTGGGTGCGGGCGTGTGAGTGTGTGTGTGTGAGTGTGTGTCGCTCCGGGTCCACGCTCATGCACACACCCACACGCCCACACTCAGG
hsa-mir-574	chr4	+	38869652	38869747	hsa-mir-574-3p	hsa-mir-574-3p_-1_3	mature	0.25		38869712	38869732	CACGCTCATGCACACACCCAC	1588	GGGACCTGCGTGGGTGCGGGCGTGTGAGTGTGTGTGTGTGAGTGTGTGTCGCTCCGGGTCCACGCTCATGCACACACCCACACGCCCACACTCAGG
hsa-mir-574	chr4	+	38869652	38869747	hsa-mir-574-3p	hsa-mir-574-3p	mature	0.5	Y	38869712	38869733	CACGCTCATGCACACACCCACA	3109	GGGACCTGCGTGGGTGCGGGCGTGTGAGTGTGTGTGTGTGAGTGTGTGTCGCTCCGGGTCCACGCTCATGCACACACCCACACGCCCACACTCAGG
hsa-mir-576	chr4	+	110409853	110409950	hsa-mir-576-5p	hsa-mir-576-5p	mature	0.37	Y	110409868	110409889	ATTCTAATTTCTCCACGTCTTT	3121	TACAATCCAACGAGGATTCTAATTTCTCCACGTCTTTGGTAATAAGGTTTGGCAAAGATGTGGAAAAATTGGAATCCTCATTCGATTGGTTATAACCA
hsa-mir-576	chr4	+	110409853	110409950	hsa-mir-576-5p	hsa-mir-576-5p_+1_3	mature	0.14		110409868	110409890	ATTCTAATTTCTCCACGTCTTTG	1210	TACAATCCAACGAGGATTCTAATTTCTCCACGTCTTTGGTAATAAGGTTTGGCAAAGATGTGGAAAAATTGGAATCCTCATTCGATTGGTTATAACCA
hsa-mir-576	chr4	+	110409853	110409950	hsa-mir-576-3p	hsa-mir-576-3p	mature	0.05	Y	110409907	110409928	AAGATGTGGAAAAATTGGAATC	437	TACAATCCAACGAGGATTCTAATTTCTCCACGTCTTTGGTAATAAGGTTTGGCAAAGATGTGGAAAAATTGGAATCCTCATTCGATTGGTTATAACCA
hsa-mir-576	chr4	+	110409853	110409950	hsa-mir-576-3p	hsa-mir-576-3p_+1_3	mature	0.21		110409907	110409929	AAGATGTGGAAAAATTGGAATCC	1752	TACAATCCAACGAGGATTCTAATTTCTCCACGTCTTTGGTAATAAGGTTTGGCAAAGATGTGGAAAAATTGGAATCCTCATTCGATTGGTTATAACCA
hsa-mir-577	chr4	+	115577914	115578009	hsa-mir-577	hsa-mir-577_+1_5	mature	0.66		115577928	115577949	GTAGATAAAATATTGGTACCTG	1645	TGGGGGAGTGAAGAGTAGATAAAATATTGGTACCTGATGAATCTGAGGCCAGGTTTCAATACTTTATCTGCTCTTCATTTCCCCATATCTACTTAC
hsa-mir-577	chr4	+	115577914	115578009	hsa-mir-577	hsa-mir-577	mature	0.08	Y	115577929	115577949	TAGATAAAATATTGGTACCTG	209	TGGGGGAGTGAAGAGTAGATAAAATATTGGTACCTGATGAATCTGAGGCCAGGTTTCAATACTTTATCTGCTCTTCATTTCCCCATATCTACTTAC
hsa-mir-579	chr5	-	32394483	32394580	hsa-mir-579	hsa-mir-579	mature	0.58	Y	32394497	32394519	TTCATTTGGTATAAACCGCGATT	485	CATATTAGGTTAATGCAAAAGTAATCGCGGTTTGTGCCAGATGACGATTTGAATTAATAAATTCATTTGGTATAAACCGCGATTATTTTTGCATCAAC
hsa-mir-579	chr5	-	32394483	32394580	hsa-mir-579	hsa-mir-579_-1_3	mature	0.15		32394498	32394519	TTCATTTGGTATAAACCGCGAT	129	CATATTAGGTTAATGCAAAAGTAATCGCGGTTTGTGCCAGATGACGATTTGAATTAATAAATTCATTTGGTATAAACCGCGATTATTTTTGCATCAAC
hsa-mir-580	chr5	-	36147993	36148089	hsa-mir-580	hsa-mir-580	mature	0.68	Y	36148008	36148029	TTGAGAATGATGAATCATTAGG	116	ATAAAATTTCCAATTGGAACCTAATGATTCATCAGACTCAGATATTTAAGTTAACAGTATTTGAGAATGATGAATCATTAGGTTCCGGTCAGAAATT
hsa-mir-580	chr5	-	36147993	36148089	hsa-mir-580	hsa-mir-580_+1_5	mature	0.14		36148008	36148030	TTTGAGAATGATGAATCATTAGG	25	ATAAAATTTCCAATTGGAACCTAATGATTCATCAGACTCAGATATTTAAGTTAACAGTATTTGAGAATGATGAATCATTAGGTTCCGGTCAGAAATT
hsa-mir-581	chr5	-	53247333	53247428	hsa-mir-581	hsa-mir-581_+2_3	mature	0.22		53247391	53247413	TCTTGTGTTCTCTAGATCAGTGC	2	GTTATGTGAAGGTATTCTTGTGTTCTCTAGATCAGTGCTTTTAGAAAATTTGTGTGATCTAAAGAACACAAAGAATACCTACACAGAACCACCTGC
hsa-mir-581	chr5	-	53247333	53247428	hsa-mir-581	hsa-mir-581_+1_3	mature	0.11		53247392	53247413	TCTTGTGTTCTCTAGATCAGTG	1	GTTATGTGAAGGTATTCTTGTGTTCTCTAGATCAGTGCTTTTAGAAAATTTGTGTGATCTAAAGAACACAAAGAATACCTACACAGAACCACCTGC
hsa-mir-581	chr5	-	53247333	53247428	hsa-mir-581	hsa-mir-581	mature	0.22	Y	53247393	53247413	TCTTGTGTTCTCTAGATCAGT	2	GTTATGTGAAGGTATTCTTGTGTTCTCTAGATCAGTGCTTTTAGAAAATTTGTGTGATCTAAAGAACACAAAGAATACCTACACAGAACCACCTGC
hsa-mir-582	chr5	-	58999431	58999528	hsa-mir-582-3p	hsa-mir-582-3p_+1_3	mature	0.11		58999454	58999476	TAACTGGTTGAACAACTGAACCC	277	ATCTGTGCTCTTTGATTACAGTTGTTCAACCAGTTACTAATCTAACTAATTGTAACTGGTTGAACAACTGAACCCAAAGGGTGCAAAGTAGAAACATT
hsa-mir-582	chr5	-	58999431	58999528	hsa-mir-582-3p	hsa-mir-582-3p	mature	0.05	Y	58999455	58999476	TAACTGGTTGAACAACTGAACC	127	ATCTGTGCTCTTTGATTACAGTTGTTCAACCAGTTACTAATCTAACTAATTGTAACTGGTTGAACAACTGAACCCAAAGGGTGCAAAGTAGAAACATT
hsa-mir-582	chr5	-	58999431	58999528	hsa-mir-582-5p	hsa-mir-582-5p	mature	0.15	Y	58999491	58999513	TTACAGTTGTTCAACCAGTTACT	390	ATCTGTGCTCTTTGATTACAGTTGTTCAACCAGTTACTAATCTAACTAATTGTAACTGGTTGAACAACTGAACCCAAAGGGTGCAAAGTAGAAACATT
hsa-mir-582	chr5	-	58999431	58999528	hsa-mir-582-5p	hsa-mir-582-5p_-1_3	mature	0.32		58999492	58999513	TTACAGTTGTTCAACCAGTTAC	798	ATCTGTGCTCTTTGATTACAGTTGTTCAACCAGTTACTAATCTAACTAATTGTAACTGGTTGAACAACTGAACCCAAAGGGTGCAAAGTAGAAACATT
hsa-mir-584	chr5	-	148441875	148441971	hsa-mir-584	hsa-mir-584_-1_3	mature	0.88		148441936	148441956	TTATGGTTTGCCTGGGACTGA	8	TAGGGTGACCAGCCATTATGGTTTGCCTGGGACTGAGGAATTTGCTGGGATATGTCAGTTCCAGGCCAACCAGGCTGGTTGGTCTCCCTGAAGCAAC
hsa-mir-584	chr5	-	148441875	148441971	hsa-mir-584	hsa-mir-584_-2_3	mature	0.11		148441937	148441956	TTATGGTTTGCCTGGGACTG	1	TAGGGTGACCAGCCATTATGGTTTGCCTGGGACTGAGGAATTTGCTGGGATATGTCAGTTCCAGGCCAACCAGGCTGGTTGGTCTCCCTGAAGCAAC
hsa-mir-586	chr6	-	45165410	45165506	hsa-mir-586	hsa-mir-586_+2_3_-1_5	mature	0.1		45165468	45165490	ATGCATTGTATTTTTAGGTCCCA	2	ATGGGGTAAAACCATTATGCATTGTATTTTTAGGTCCCAATACATGTGGGCCCTAAAAATACAATGCATAATGGTTTTTCACTCTTTATCTTCTTAT
hsa-mir-586	chr6	-	45165410	45165506	hsa-mir-586	hsa-mir-586	mature	0.65	Y	45165470	45165491	TATGCATTGTATTTTTAGGTCC	13	ATGGGGTAAAACCATTATGCATTGTATTTTTAGGTCCCAATACATGTGGGCCCTAAAAATACAATGCATAATGGTTTTTCACTCTTTATCTTCTTAT
hsa-mir-586	chr6	-	45165410	45165506	hsa-mir-586	hsa-mir-586_-2_3	mature	0.2		45165472	45165491	TATGCATTGTATTTTTAGGT	4	ATGGGGTAAAACCATTATGCATTGTATTTTTAGGTCCCAATACATGTGGGCCCTAAAAATACAATGCATAATGGTTTTTCACTCTTTATCTTCTTAT
hsa-mir-588	chr6	+	126805776	126805858	hsa-mir-588	hsa-mir-588_-1_5	mature	0.13		126805792	126805811	TGGCCACAATGGGTTAGAAC	4	AGCTTAGGTACCAATTTGGCCACAATGGGTTAGAACACTATTCCATTGTGTTCTTACCCACCATGGCCAAAATTGGGCCTAAG
hsa-mir-588	chr6	+	126805776	126805858	hsa-mir-588	hsa-mir-588_+1_3_-1_5	mature	0.1		126805792	126805812	TGGCCACAATGGGTTAGAACA	3	AGCTTAGGTACCAATTTGGCCACAATGGGTTAGAACACTATTCCATTGTGTTCTTACCCACCATGGCCAAAATTGGGCCTAAG
hsa-mir-588	chr6	+	126805776	126805858	hsa-mir-588	hsa-mir-588_+2_3_-1_5	mature	0.17		126805792	126805813	TGGCCACAATGGGTTAGAACAC	5	AGCTTAGGTACCAATTTGGCCACAATGGGTTAGAACACTATTCCATTGTGTTCTTACCCACCATGGCCAAAATTGGGCCTAAG
hsa-mir-588	chr6	+	126805776	126805858	hsa-mir-588-star	hsa-mir-588-star_+1_5	star	0.13		126805826	126805847	TTCTTACCCACCATGGCCAAAA	4	AGCTTAGGTACCAATTTGGCCACAATGGGTTAGAACACTATTCCATTGTGTTCTTACCCACCATGGCCAAAATTGGGCCTAAG
hsa-mir-589	chr7	-	5535449	5535547	hsa-mir-589*	hsa-mir-589*_-2_5	mature	0.1		5535464	5535485	AGAACAAATGCCGGTTCCCAGA	57	TCCAGCCTGTGCCCAGCAGCCCCTGAGAACCACGTCTGCTCTGAGCTGGGTACTGCCTGTTCAGAACAAATGCCGGTTCCCAGACGCTGCCAGCTGGCC
hsa-mir-589	chr7	-	5535449	5535547	hsa-mir-589*	hsa-mir-589*_Edit_5	matureEdit	0.01	Y	5535464	5535487	TCAGAGCAAATGCCGGTTCCCAGA	10	TCCAGCCTGTGCCCAGCAGCCCCTGAGAACCACGTCTGCTCTGAGCTGGGTACTGCCTGTTCAGAACAAATGCCGGTTCCCAGACGCTGCCAGCTGGCC
hsa-mir-589	chr7	-	5535449	5535547	hsa-mir-589*	hsa-mir-589*	mature	0.2	Y	5535464	5535487	TCAGAACAAATGCCGGTTCCCAGA	111	TCCAGCCTGTGCCCAGCAGCCCCTGAGAACCACGTCTGCTCTGAGCTGGGTACTGCCTGTTCAGAACAAATGCCGGTTCCCAGACGCTGCCAGCTGGCC
hsa-mir-589	chr7	-	5535449	5535547	hsa-mir-589	hsa-mir-589	mature	0.02	Y	5535503	5535524	TGAGAACCACGTCTGCTCTGAG	13	TCCAGCCTGTGCCCAGCAGCCCCTGAGAACCACGTCTGCTCTGAGCTGGGTACTGCCTGTTCAGAACAAATGCCGGTTCCCAGACGCTGCCAGCTGGCC
hsa-mir-589	chr7	-	5535449	5535547	hsa-mir-589	hsa-mir-589_-1_3	mature	0.36		5535504	5535524	TGAGAACCACGTCTGCTCTGA	199	TCCAGCCTGTGCCCAGCAGCCCCTGAGAACCACGTCTGCTCTGAGCTGGGTACTGCCTGTTCAGAACAAATGCCGGTTCCCAGACGCTGCCAGCTGGCC
hsa-mir-590	chr7	+	73605527	73605623	hsa-mir-590-5p	hsa-mir-590-5p	mature	0.01	Y	73605542	73605563	GAGCTTATTCATAAAAGTGCAG	1167	TAGCCAGTCAGAAATGAGCTTATTCATAAAAGTGCAGTATGGTGAAGTCAATCTGTAATTTTATGTATAAGCTAGTCTCTGATTGAAACATGCAGCA
hsa-mir-590	chr7	+	73605527	73605623	hsa-mir-590-3p	hsa-mir-590-3p_+1_5	mature	0.17		73605581	73605602	GTAATTTTATGTATAAGCTAGT	11411	TAGCCAGTCAGAAATGAGCTTATTCATAAAAGTGCAGTATGGTGAAGTCAATCTGTAATTTTATGTATAAGCTAGTCTCTGATTGAAACATGCAGCA
hsa-mir-590	chr7	+	73605527	73605623	hsa-mir-590-3p	hsa-mir-590-3p	mature	0.62	Y	73605582	73605602	TAATTTTATGTATAAGCTAGT	41758	TAGCCAGTCAGAAATGAGCTTATTCATAAAAGTGCAGTATGGTGAAGTCAATCTGTAATTTTATGTATAAGCTAGTCTCTGATTGAAACATGCAGCA
hsa-mir-590	chr7	+	73605527	73605623	hsa-mir-590-3p	hsa-mir-590-3p_+1_3	mature	0.13		73605582	73605603	TAATTTTATGTATAAGCTAGTC	8982	TAGCCAGTCAGAAATGAGCTTATTCATAAAAGTGCAGTATGGTGAAGTCAATCTGTAATTTTATGTATAAGCTAGTCTCTGATTGAAACATGCAGCA
hsa-mir-592	chr7	-	126698141	126698237	hsa-mir-592	hsa-mir-592	mature	0.75	Y	126698201	126698222	TTGTGTCAATATGCGATGATGT	6	TATTATGCCATGACATTGTGTCAATATGCGATGATGTGTTGTGATGGCACAGCGTCATCACGTGGTGACGCAACATCATGACGTAAGACGTCACAAC
hsa-mir-592	chr7	-	126698141	126698237	hsa-mir-592	hsa-mir-592_-2_3_+1_5	mature	0.25		126698203	126698223	ATTGTGTCAATATGCGATGAT	2	TATTATGCCATGACATTGTGTCAATATGCGATGATGTGTTGTGATGGCACAGCGTCATCACGTGGTGACGCAACATCATGACGTAAGACGTCACAAC
hsa-mir-597	chr8	+	9599181	9599277	hsa-mir-597	hsa-mir-597	mature	0.81	Y	9599196	9599217	TGTGTCACTCGATGACCACTGT	617	TACTTACTCTACGTGTGTGTCACTCGATGACCACTGTGAAGACAGTAAAATGTACAGTGGTTCTCTTGTGGCTCAAGCGTAATGTAGAGTACTGGTC
hsa-mir-598	chr8	-	10892715	10892811	hsa-mir-598	hsa-mir-598_+1_3	mature	0.25		10892729	10892751	TACGTCATCGTTGTCATCGTCAT	263	GCTTGATGATGCTGCTGATGCTGGCGGTGATCCCGATGGTGTGAGCTGGAAATGGGGTGCTACGTCATCGTTGTCATCGTCATCATCATCATCCGAG
hsa-mir-598	chr8	-	10892715	10892811	hsa-mir-598	hsa-mir-598	mature	0.49	Y	10892730	10892751	TACGTCATCGTTGTCATCGTCA	520	GCTTGATGATGCTGCTGATGCTGGCGGTGATCCCGATGGTGTGAGCTGGAAATGGGGTGCTACGTCATCGTTGTCATCGTCATCATCATCATCCGAG
hsa-mir-598	chr8	-	10892715	10892811	hsa-mir-598	hsa-mir-598_-1_3	mature	0.17		10892731	10892751	TACGTCATCGTTGTCATCGTC	188	GCTTGATGATGCTGCTGATGCTGGCGGTGATCCCGATGGTGTGAGCTGGAAATGGGGTGCTACGTCATCGTTGTCATCGTCATCATCATCATCCGAG
hsa-mir-600	chr9	-	125873824	125873921	hsa-mir-600	hsa-mir-600	mature	0.22	Y	125873839	125873861	ACTTACAGACAAGAGCCTTGCTC	2	AAGTCACGTGCTGTGGCTCCAGCTTCATAGGAAGGCTCTTGTCTGTCAGGCAGTGGAGTTACTTACAGACAAGAGCCTTGCTCAGGCCAGCCCTGCCC
hsa-mir-600	chr9	-	125873824	125873921	hsa-mir-600	hsa-mir-600_-1_3	mature	0.44		125873840	125873861	ACTTACAGACAAGAGCCTTGCT	4	AAGTCACGTGCTGTGGCTCCAGCTTCATAGGAAGGCTCTTGTCTGTCAGGCAGTGGAGTTACTTACAGACAAGAGCCTTGCTCAGGCCAGCCCTGCCC
hsa-mir-600	chr9	-	125873824	125873921	hsa-mir-600	hsa-mir-600_-1_3_+1_5	mature	0.11		125873840	125873862	TACTTACAGACAAGAGCCTTGCT	1	AAGTCACGTGCTGTGGCTCCAGCTTCATAGGAAGGCTCTTGTCTGTCAGGCAGTGGAGTTACTTACAGACAAGAGCCTTGCTCAGGCCAGCCCTGCCC
hsa-mir-607	chr10	-	98588425	98588520	hsa-mir-607	hsa-mir-607_+1_3	mature	0.25		98588439	98588460	GTTCAAATCCAGATCTATAACT	3	TTGCCTAAAGTCACACAGGTTATAGATCTGGATTGGAACCCAGGGAGCCAGACTGCCTGGGTTCAAATCCAGATCTATAACTTGTGTGACTTTGGG
hsa-mir-607	chr10	-	98588425	98588520	hsa-mir-607	hsa-mir-607	mature	0.08	Y	98588440	98588460	GTTCAAATCCAGATCTATAAC	1	TTGCCTAAAGTCACACAGGTTATAGATCTGGATTGGAACCCAGGGAGCCAGACTGCCTGGGTTCAAATCCAGATCTATAACTTGTGTGACTTTGGG
hsa-mir-607	chr10	-	98588425	98588520	hsa-mir-607	hsa-mir-607_+1_5	mature	0.16		98588440	98588461	GGTTCAAATCCAGATCTATAAC	2	TTGCCTAAAGTCACACAGGTTATAGATCTGGATTGGAACCCAGGGAGCCAGACTGCCTGGGTTCAAATCCAGATCTATAACTTGTGTGACTTTGGG
hsa-mir-609	chr10	-	105978546	105978640	hsa-mir-609-star	hsa-mir-609-star_+2_5	star	0.5		105978562	105978583	AGAGATGAGGGCAACACCCTAG	4	TGCTCGGCTGTTCCTAGGGTGTTTCTCTCATCTCTGGTCTATAATGGGTTAAATAGTAGAGATGAGGGCAACACCCTAGGAACAGCAGAGGAACC
hsa-mir-609	chr10	-	105978546	105978640	hsa-mir-609	hsa-mir-609_+1_3_+1_5	mature	0.12		105978605	105978626	TAGGGTGTTTCTCTCATCTCTG	1	TGCTCGGCTGTTCCTAGGGTGTTTCTCTCATCTCTGGTCTATAATGGGTTAAATAGTAGAGATGAGGGCAACACCCTAGGAACAGCAGAGGAACC
hsa-mir-609	chr10	-	105978546	105978640	hsa-mir-609	hsa-mir-609_+1_5	mature	0.37		105978606	105978626	TAGGGTGTTTCTCTCATCTCT	3	TGCTCGGCTGTTCCTAGGGTGTTTCTCTCATCTCTGGTCTATAATGGGTTAAATAGTAGAGATGAGGGCAACACCCTAGGAACAGCAGAGGAACC
hsa-mir-610	chr11	+	28078361	28078456	hsa-mir-610	hsa-mir-610	mature	0.2	Y	28078376	28078396	TGAGCTAAATGTGTGCTGGGA	1	TCTATTTGTCTTAGGTGAGCTAAATGTGTGCTGGGACACATTTGAGCCAAATGTCCCAGCACACATTTAGCTCACATAAGAAAAATGGACTCTAGT
hsa-mir-610	chr11	+	28078361	28078456	hsa-mir-610	hsa-mir-610_+1_3	mature	0.4		28078376	28078397	TGAGCTAAATGTGTGCTGGGAC	2	TCTATTTGTCTTAGGTGAGCTAAATGTGTGCTGGGACACATTTGAGCCAAATGTCCCAGCACACATTTAGCTCACATAAGAAAAATGGACTCTAGT
hsa-mir-615	chr12	+	54427733	54427828	hsa-mir-615-5p	hsa-mir-615-5p	mature	0.02	Y	54427750	54427771	GGGGGTCCCCGGTGCTCGGATC	4	CTCGGGAGGGGCGGGAGGGGGGTCCCCGGTGCTCGGATCTCGAGGGTGCTTATTGTTCGGTCCGAGCCTGGGTCTCCCTCTTCCCCCCAACCCCCC
hsa-mir-615	chr12	+	54427733	54427828	hsa-mir-615-3p	hsa-mir-615-3p_-1_3	mature	0.5		54427793	54427813	TCCGAGCCTGGGTCTCCCTCT	84	CTCGGGAGGGGCGGGAGGGGGGTCCCCGGTGCTCGGATCTCGAGGGTGCTTATTGTTCGGTCCGAGCCTGGGTCTCCCTCTTCCCCCCAACCCCCC
hsa-mir-615	chr12	+	54427733	54427828	hsa-mir-615-3p	hsa-mir-615-3p	mature	0.34	Y	54427793	54427814	TCCGAGCCTGGGTCTCCCTCTT	57	CTCGGGAGGGGCGGGAGGGGGGTCCCCGGTGCTCGGATCTCGAGGGTGCTTATTGTTCGGTCCGAGCCTGGGTCTCCCTCTTCCCCCCAACCCCCC
hsa-mir-616	chr12	-	57912945	57913041	hsa-mir-616	hsa-mir-616	mature	0	Y	57912965	57912986	AGTCATTGGAGGGTTTGAGCAG	5	TTAGGTAATTCCTCCACTCAAAACCCTTCAGTGACTTCCATGACATGAAATAGGAAGTCATTGGAGGGTTTGAGCAGAGGAATGACCTGTTTTAAAA
hsa-mir-616	chr12	-	57912945	57913041	hsa-mir-616*	hsa-mir-616*_+1_3	mature	0.31		57913004	57913026	ACTCAAAACCCTTCAGTGACTTC	316	TTAGGTAATTCCTCCACTCAAAACCCTTCAGTGACTTCCATGACATGAAATAGGAAGTCATTGGAGGGTTTGAGCAGAGGAATGACCTGTTTTAAAA
hsa-mir-616	chr12	-	57912945	57913041	hsa-mir-616*	hsa-mir-616*	mature	0.45	Y	57913005	57913026	ACTCAAAACCCTTCAGTGACTT	467	TTAGGTAATTCCTCCACTCAAAACCCTTCAGTGACTTCCATGACATGAAATAGGAAGTCATTGGAGGGTTTGAGCAGAGGAATGACCTGTTTTAAAA
hsa-mir-616	chr12	-	57912945	57913041	hsa-mir-616*	hsa-mir-616*_-1_3	mature	0.14		57913006	57913026	ACTCAAAACCCTTCAGTGACT	145	TTAGGTAATTCCTCCACTCAAAACCCTTCAGTGACTTCCATGACATGAAATAGGAAGTCATTGGAGGGTTTGAGCAGAGGAATGACCTGTTTTAAAA
hsa-mir-624	chr14	-	31483851	31483947	hsa-mir-624	hsa-mir-624	mature	0	Y	31483874	31483894	CACAAGGTATTGGTATTACCT	6	AATGCTGTTTCAAGGTAGTACCAGTACCTTGTGTTCAGTGGAACCAAGGTAAACACAAGGTATTGGTATTACCTTGAGATAGCATTACACCTAAGTG
hsa-mir-624	chr14	-	31483851	31483947	hsa-mir-624*	hsa-mir-624*	mature	0.36	Y	31483911	31483932	TAGTACCAGTACCTTGTGTTCA	269	AATGCTGTTTCAAGGTAGTACCAGTACCTTGTGTTCAGTGGAACCAAGGTAAACACAAGGTATTGGTATTACCTTGAGATAGCATTACACCTAAGTG
hsa-mir-624	chr14	-	31483851	31483947	hsa-mir-624*	hsa-mir-624*_-1_3	mature	0.15		31483912	31483932	TAGTACCAGTACCTTGTGTTC	114	AATGCTGTTTCAAGGTAGTACCAGTACCTTGTGTTCAGTGGAACCAAGGTAAACACAAGGTATTGGTATTACCTTGAGATAGCATTACACCTAAGTG
hsa-mir-625	chr14	+	65937819	65937903	hsa-mir-625	hsa-mir-625	mature	0.1	Y	65937833	65937853	AGGGGGAAAGTTCTATAGTCC	2746	AGGGTAGAGGGATGAGGGGGAAAGTTCTATAGTCCTGTAATTAGATCTCAGGACTATAGAACTTTCCCCCTCATCCCTCTGCCCT
hsa-mir-625	chr14	+	65937819	65937903	hsa-mir-625	hsa-mir-625_+1_3	mature	0.37		65937833	65937854	AGGGGGAAAGTTCTATAGTCCT	9321	AGGGTAGAGGGATGAGGGGGAAAGTTCTATAGTCCTGTAATTAGATCTCAGGACTATAGAACTTTCCCCCTCATCCCTCTGCCCT
hsa-mir-625	chr14	+	65937819	65937903	hsa-mir-625*	hsa-mir-625*_Edit_6	matureEdit	0	Y	65937870	65937891	GACTATGGAACTTTCCCCCTCA	192	AGGGTAGAGGGATGAGGGGGAAAGTTCTATAGTCCTGTAATTAGATCTCAGGACTATAGAACTTTCCCCCTCATCCCTCTGCCCT
hsa-mir-625	chr14	+	65937819	65937903	hsa-mir-625*	hsa-mir-625*	mature	0.15	Y	65937870	65937891	GACTATAGAACTTTCCCCCTCA	3965	AGGGTAGAGGGATGAGGGGGAAAGTTCTATAGTCCTGTAATTAGATCTCAGGACTATAGAACTTTCCCCCTCATCCCTCTGCCCT
hsa-mir-627	chr15	-	42491767	42491863	hsa-mir-627-star	hsa-mir-627-star_-1_3	star	0.19		42491790	42491810	CTCTTTTCTTTGAGACTCACT	460	TACTTATTACTGGTAGTGAGTCTCTAAGAAAAGAGGAGGTGGTTGTTTTCCTCCTCTTTTCTTTGAGACTCACTACCAATAATAAGAAATACTACTA
hsa-mir-627	chr15	-	42491767	42491863	hsa-mir-627	hsa-mir-627	mature	0.09	Y	42491827	42491848	GTGAGTCTCTAAGAAAAGAGGA	222	TACTTATTACTGGTAGTGAGTCTCTAAGAAAAGAGGAGGTGGTTGTTTTCCTCCTCTTTTCTTTGAGACTCACTACCAATAATAAGAAATACTACTA
hsa-mir-628	chr15	-	55665137	55665231	hsa-mir-628-3p	hsa-mir-628-3p	mature	0.06	Y	55665151	55665171	TCTAGTAAGAGTGGCAGTCGA	100	ATAGCTGTTGTGTCACTTCCTCATGCTGACATATTTACTAGAGGGTAAAATTAATAACCTTCTAGTAAGAGTGGCAGTCGAAGGGAAGGGCTCAT
hsa-mir-628	chr15	-	55665137	55665231	hsa-mir-628-3p	hsa-mir-628-3p_+1_5	mature	0.27		55665151	55665172	TTCTAGTAAGAGTGGCAGTCGA	445	ATAGCTGTTGTGTCACTTCCTCATGCTGACATATTTACTAGAGGGTAAAATTAATAACCTTCTAGTAAGAGTGGCAGTCGAAGGGAAGGGCTCAT
hsa-mir-628	chr15	-	55665137	55665231	hsa-mir-628-5p	hsa-mir-628-5p	mature	0.33	Y	55665188	55665209	ATGCTGACATATTTACTAGAGG	542	ATAGCTGTTGTGTCACTTCCTCATGCTGACATATTTACTAGAGGGTAAAATTAATAACCTTCTAGTAAGAGTGGCAGTCGAAGGGAAGGGCTCAT
hsa-mir-629	chr15	-	70371710	70371806	hsa-mir-629*	hsa-mir-629*	mature	0.06	Y	70371725	70371746	GTTCTCCCAACGTAAGCCCAGC	161	TCCCTTTCCCAGGGGAGGGGCTGGGTTTACGTTGGGAGAACTTTTACGGTGAACCAGGAGGTTCTCCCAACGTAAGCCCAGCCCCTCCCCTCTGCCT
hsa-mir-629	chr15	-	70371710	70371806	hsa-mir-629	hsa-mir-629_+2_3	mature	0.12		70371763	70371785	TGGGTTTACGTTGGGAGAACTTT	290	TCCCTTTCCCAGGGGAGGGGCTGGGTTTACGTTGGGAGAACTTTTACGGTGAACCAGGAGGTTCTCCCAACGTAAGCCCAGCCCCTCCCCTCTGCCT
hsa-mir-629	chr15	-	70371710	70371806	hsa-mir-629	hsa-mir-629_+1_3	mature	0.3		70371764	70371785	TGGGTTTACGTTGGGAGAACTT	725	TCCCTTTCCCAGGGGAGGGGCTGGGTTTACGTTGGGAGAACTTTTACGGTGAACCAGGAGGTTCTCCCAACGTAAGCCCAGCCCCTCCCCTCTGCCT
hsa-mir-629	chr15	-	70371710	70371806	hsa-mir-629	hsa-mir-629	mature	0.19	Y	70371765	70371785	TGGGTTTACGTTGGGAGAACT	466	TCCCTTTCCCAGGGGAGGGGCTGGGTTTACGTTGGGAGAACTTTTACGGTGAACCAGGAGGTTCTCCCAACGTAAGCCCAGCCCCTCCCCTCTGCCT
hsa-mir-629	chr15	-	70371710	70371806	hsa-mir-629	hsa-mir-629_-1_3	mature	0.1		70371766	70371785	TGGGTTTACGTTGGGAGAAC	258	TCCCTTTCCCAGGGGAGGGGCTGGGTTTACGTTGGGAGAACTTTTACGGTGAACCAGGAGGTTCTCCCAACGTAAGCCCAGCCCCTCCCCTCTGCCT
hsa-mir-636	chr17	-	74732531	74732629	hsa-mir-636	hsa-mir-636_+1_3	mature	0.16		74732546	74732569	TGTGCTTGCTCGTCCCGCCCGCAG	1	TGGCGGCCTGGGCGGGAGCGCGCGGGCGGGGCCGGCCCCGCTGCCTGGAATTAACCCCGCTGTGCTTGCTCGTCCCGCCCGCAGCCCTAGGCGGCGTCG
hsa-mir-636	chr17	-	74732531	74732629	hsa-mir-636	hsa-mir-636	mature	0.5	Y	74732547	74732569	TGTGCTTGCTCGTCCCGCCCGCA	3	TGGCGGCCTGGGCGGGAGCGCGCGGGCGGGGCCGGCCCCGCTGCCTGGAATTAACCCCGCTGTGCTTGCTCGTCCCGCCCGCAGCCCTAGGCGGCGTCG
hsa-mir-636	chr17	-	74732531	74732629	hsa-mir-636	hsa-mir-636_-1_3	mature	0.33		74732548	74732569	TGTGCTTGCTCGTCCCGCCCGC	2	TGGCGGCCTGGGCGGGAGCGCGCGGGCGGGGCCGGCCCCGCTGCCTGGAATTAACCCCGCTGTGCTTGCTCGTCCCGCCCGCAGCCCTAGGCGGCGTCG
hsa-mir-641	chr19	-	40788449	40788547	hsa-mir-641	hsa-mir-641_other1	other	0.12		40788461	40788482	TGACTGTCCTATGTCTTTCCTT	139	TGGGTGAAAGGAAGGAAAGACATAGGATAGAGTCACCTCTGTCCTCTGTCCTCTACCTATAGAGGTGACTGTCCTATGTCTTTCCTTCCTCTTACCCCT
hsa-mir-641	chr19	-	40788449	40788547	hsa-mir-641-star	hsa-mir-641-star_+1_3_-2_5	star	0.17		40788462	40788482	TGACTGTCCTATGTCTTTCCT	197	TGGGTGAAAGGAAGGAAAGACATAGGATAGAGTCACCTCTGTCCTCTGTCCTCTACCTATAGAGGTGACTGTCCTATGTCTTTCCTTCCTCTTACCCCT
hsa-mir-641	chr19	-	40788449	40788547	hsa-mir-641	hsa-mir-641	mature	0.13	Y	40788509	40788532	AAAGACATAGGATAGAGTCACCTC	151	TGGGTGAAAGGAAGGAAAGACATAGGATAGAGTCACCTCTGTCCTCTGTCCTCTACCTATAGAGGTGACTGTCCTATGTCTTTCCTTCCTCTTACCCCT
hsa-mir-641	chr19	-	40788449	40788547	hsa-mir-641	hsa-mir-641_-1_3	mature	0.32		40788510	40788532	AAAGACATAGGATAGAGTCACCT	371	TGGGTGAAAGGAAGGAAAGACATAGGATAGAGTCACCTCTGTCCTCTGTCCTCTACCTATAGAGGTGACTGTCCTATGTCTTTCCTTCCTCTTACCCCT
hsa-mir-642a	chr19	+	46178185	46178281	hsa-mir-642a	hsa-mir-642a	mature	0.68	Y	46178200	46178221	GTCCCTCTCCAAATGTGTCTTG	1109	ATCTGAGTTGGGAGGGTCCCTCTCCAAATGTGTCTTGGGGTGGGGGATCAAGACACATTTGGAGAGGGAACCTCCCAACTCGGCCTCTGCCATCATT
hsa-mir-642a	chr19	+	46178185	46178281	hsa-mir-642a-star	hsa-mir-642a-star_-1_3	star	0.16		46178235	46178255	AGACACATTTGGAGAGGGAAC	271	ATCTGAGTTGGGAGGGTCCCTCTCCAAATGTGTCTTGGGGTGGGGGATCAAGACACATTTGGAGAGGGAACCTCCCAACTCGGCCTCTGCCATCATT
hsa-mir-642b	chr19	-	46178189	46178265	hsa-mir-642b-star	hsa-mir-642b-star_+1_3	star	0.3		46178232	46178254	TTCCCTCTCCAAATGTGTCTTGA	55	GAGTTGGGAGGTTCCCTCTCCAAATGTGTCTTGATCCCCCACCCCAAGACACATTTGGAGAGGGACCCTCCCAACTC
hsa-mir-642b	chr19	-	46178189	46178265	hsa-mir-642b-star	hsa-mir-642b-star	star	0.39		46178233	46178254	TTCCCTCTCCAAATGTGTCTTG	71	GAGTTGGGAGGTTCCCTCTCCAAATGTGTCTTGATCCCCCACCCCAAGACACATTTGGAGAGGGACCCTCCCAACTC
hsa-mir-643	chr19	+	52785049	52785145	hsa-mir-643	hsa-mir-643_other1	other	0.24		52785107	52785128	ACACTTGTATGCTAGCTCAGGT	77	ACCAAGTGATATTCATTGTCTACCTGAGCTAGAATACAAGTAGTTGGCGTCTTCAGAGACACTTGTATGCTAGCTCAGGTAGATATTGAATGAAAAA
hsa-mir-643	chr19	+	52785049	52785145	hsa-mir-643	hsa-mir-643	mature	0.37	Y	52785109	52785130	ACTTGTATGCTAGCTCAGGTAG	115	ACCAAGTGATATTCATTGTCTACCTGAGCTAGAATACAAGTAGTTGGCGTCTTCAGAGACACTTGTATGCTAGCTCAGGTAGATATTGAATGAAAAA
hsa-mir-651	chrX	+	8095005	8095101	hsa-mir-651	hsa-mir-651_-1_3	mature	0.22		8095020	8095040	TTTAGGATAAGCTTGACTTTT	129	AATCTATCACTGCTTTTTAGGATAAGCTTGACTTTTGTTCAAATAAAAATGCAAAAGGAAAGTGTATCCTAAAAGGCAATGACAGTTTAATGTGTTT
hsa-mir-651	chrX	+	8095005	8095101	hsa-mir-651	hsa-mir-651	mature	0.4	Y	8095020	8095041	TTTAGGATAAGCTTGACTTTTG	230	AATCTATCACTGCTTTTTAGGATAAGCTTGACTTTTGTTCAAATAAAAATGCAAAAGGAAAGTGTATCCTAAAAGGCAATGACAGTTTAATGTGTTT
hsa-mir-651	chrX	+	8095005	8095101	hsa-mir-651	hsa-mir-651_+1_3	mature	0.13		8095020	8095042	TTTAGGATAAGCTTGACTTTTGT	77	AATCTATCACTGCTTTTTAGGATAAGCTTGACTTTTGTTCAAATAAAAATGCAAAAGGAAAGTGTATCCTAAAAGGCAATGACAGTTTAATGTGTTT
hsa-mir-652	chrX	+	109298556	109298653	hsa-mir-652	hsa-mir-652_-1_3	mature	0.21		109298616	109298635	AATGGCGCCACTAGGGTTGT	407	ACGAATGGCTATGCACTGCACAACCCTAGGAGAGGGTGCCATTCACATAGACTATAATTGAATGGCGCCACTAGGGTTGTGCAGTGCACAACCTACAC
hsa-mir-652	chrX	+	109298556	109298653	hsa-mir-652	hsa-mir-652	mature	0.09	Y	109298616	109298636	AATGGCGCCACTAGGGTTGTG	179	ACGAATGGCTATGCACTGCACAACCCTAGGAGAGGGTGCCATTCACATAGACTATAATTGAATGGCGCCACTAGGGTTGTGCAGTGCACAACCTACAC
hsa-mir-652	chrX	+	109298556	109298653	hsa-mir-652	hsa-mir-652_+1_3	mature	0.49		109298616	109298637	AATGGCGCCACTAGGGTTGTGC	927	ACGAATGGCTATGCACTGCACAACCCTAGGAGAGGGTGCCATTCACATAGACTATAATTGAATGGCGCCACTAGGGTTGTGCAGTGCACAACCTACAC
hsa-mir-654	chr14	+	101506555	101506635	hsa-mir-654-5p	hsa-mir-654-5p	mature	0.06	Y	101506570	101506591	TGGTGGGCCGCAGAACATGTGC	1	GGGTAAGTGGAAAGATGGTGGGCCGCAGAACATGTGCTGAGTTCGTGCCATATGTCTGCTGACCATCACCTTTAGAAGCCC
hsa-mir-654	chr14	+	101506555	101506635	hsa-mir-654-3p	hsa-mir-654-3p_-3_3	mature	0.26		101506605	101506623	TATGTCTGCTGACCATCAC	4	GGGTAAGTGGAAAGATGGTGGGCCGCAGAACATGTGCTGAGTTCGTGCCATATGTCTGCTGACCATCACCTTTAGAAGCCC
hsa-mir-654	chr14	+	101506555	101506635	hsa-mir-654-3p	hsa-mir-654-3p_-2_3	mature	0.4		101506605	101506624	TATGTCTGCTGACCATCACC	6	GGGTAAGTGGAAAGATGGTGGGCCGCAGAACATGTGCTGAGTTCGTGCCATATGTCTGCTGACCATCACCTTTAGAAGCCC
hsa-mir-654	chr14	+	101506555	101506635	hsa-mir-654-3p	hsa-mir-654-3p_-1_3	mature	0.13		101506605	101506625	TATGTCTGCTGACCATCACCT	2	GGGTAAGTGGAAAGATGGTGGGCCGCAGAACATGTGCTGAGTTCGTGCCATATGTCTGCTGACCATCACCTTTAGAAGCCC
hsa-mir-654	chr14	+	101506555	101506635	hsa-mir-654-3p	hsa-mir-654-3p	mature	0.13	Y	101506605	101506626	TATGTCTGCTGACCATCACCTT	2	GGGTAAGTGGAAAGATGGTGGGCCGCAGAACATGTGCTGAGTTCGTGCCATATGTCTGCTGACCATCACCTTTAGAAGCCC
hsa-mir-655	chr14	+	101515886	101515982	hsa-mir-655	hsa-mir-655_-2_3_+1_5	mature	0.2		101515945	101515965	AATAATACATGGTTAACCTCT	3	AACTATGCAAGGATATTTGAGGAGAGGTTATCCGTGTTATGTTCGCTTCATTCATCATGAATAATACATGGTTAACCTCTTTTTGAATATCAGACTC
hsa-mir-655	chr14	+	101515886	101515982	hsa-mir-655	hsa-mir-655	mature	0.66	Y	101515946	101515967	ATAATACATGGTTAACCTCTTT	10	AACTATGCAAGGATATTTGAGGAGAGGTTATCCGTGTTATGTTCGCTTCATTCATCATGAATAATACATGGTTAACCTCTTTTTGAATATCAGACTC
hsa-mir-659	chr22	-	38243684	38243780	hsa-mir-659	hsa-mir-659_-1_5	mature	0.11		38243699	38243719	TTGGTTCAGGGAGGGTCCCCA	1	TACCGACCCTCGATTTGGTTCAGGACCTTCCCTGAACCAAGGAAGAGTCACAGTCTCTTCCTTGGTTCAGGGAGGGTCCCCAACAATGTCCTCATGG
hsa-mir-659	chr22	-	38243684	38243780	hsa-mir-659-star	hsa-mir-659-star_+1_5	star	0.11		38243738	38243760	CAGGACCTTCCCTGAACCAAGGA	1	TACCGACCCTCGATTTGGTTCAGGACCTTCCCTGAACCAAGGAAGAGTCACAGTCTCTTCCTTGGTTCAGGGAGGGTCCCCAACAATGTCCTCATGG
hsa-mir-659	chr22	-	38243684	38243780	hsa-mir-659-star	hsa-mir-659-star_-1_3_-1_5	star	0.22		38243739	38243758	GGACCTTCCCTGAACCAAGG	2	TACCGACCCTCGATTTGGTTCAGGACCTTCCCTGAACCAAGGAAGAGTCACAGTCTCTTCCTTGGTTCAGGGAGGGTCCCCAACAATGTCCTCATGG
hsa-mir-659	chr22	-	38243684	38243780	hsa-mir-659-star	hsa-mir-659-star_-1_3	star	0.11		38243739	38243759	AGGACCTTCCCTGAACCAAGG	1	TACCGACCCTCGATTTGGTTCAGGACCTTCCCTGAACCAAGGAAGAGTCACAGTCTCTTCCTTGGTTCAGGGAGGGTCCCCAACAATGTCCTCATGG
hsa-mir-659	chr22	-	38243684	38243780	hsa-mir-659-star	hsa-mir-659-star_-1_3_+1_5	star	0.11		38243739	38243760	CAGGACCTTCCCTGAACCAAGG	1	TACCGACCCTCGATTTGGTTCAGGACCTTCCCTGAACCAAGGAAGAGTCACAGTCTCTTCCTTGGTTCAGGGAGGGTCCCCAACAATGTCCTCATGG
hsa-mir-659	chr22	-	38243684	38243780	hsa-mir-659-star	hsa-mir-659-star_-1_3_+2_5	star	0.22		38243739	38243761	TCAGGACCTTCCCTGAACCAAGG	2	TACCGACCCTCGATTTGGTTCAGGACCTTCCCTGAACCAAGGAAGAGTCACAGTCTCTTCCTTGGTTCAGGGAGGGTCCCCAACAATGTCCTCATGG
hsa-mir-659	chr22	-	38243684	38243780	hsa-mir-659-star	hsa-mir-659-star_-2_3	star	0.11		38243740	38243759	AGGACCTTCCCTGAACCAAG	1	TACCGACCCTCGATTTGGTTCAGGACCTTCCCTGAACCAAGGAAGAGTCACAGTCTCTTCCTTGGTTCAGGGAGGGTCCCCAACAATGTCCTCATGG
hsa-mir-660	chrX	+	49777848	49777944	hsa-mir-660	hsa-mir-660	mature	0.2	Y	49777863	49777884	TACCCATTGCATATCGGAGTTG	3274	CTGCTCCTTCTCCCATACCCATTGCATATCGGAGTTGTGAATTCTCAAAACACCTCCTGTGTGCATGGATTACAGGAGGGTGAGCCTTGTCATCGTG
hsa-mir-660	chrX	+	49777848	49777944	hsa-mir-660	hsa-mir-660_+1_3	mature	0.72		49777863	49777885	TACCCATTGCATATCGGAGTTGT	11628	CTGCTCCTTCTCCCATACCCATTGCATATCGGAGTTGTGAATTCTCAAAACACCTCCTGTGTGCATGGATTACAGGAGGGTGAGCCTTGTCATCGTG
hsa-mir-663b	chr2	-	133014538	133014652	hsa-mir-663b	hsa-mir-663b_other1	other	0.28		133014529	133014550	TGCCTGAGGTTTCTCCCCGAGC	6	GGTGCCGAGGGCCGTCCGGCATCCTAGGCGGGTCGCTGCGGTACCTCCCTCCTGTCTGTGGCGGTGGGATCCCGTGGCCGTGTTTTCCTGGTGGCCCGGCCGTGCCTGAGGTTTC
hsa-mir-664	chr1	-	220373879	220373960	hsa-mir-664	hsa-mir-664	mature	0.38	Y	220373890	220373912	TATTCATTTATCCCCAGCCTACA	676	GAACATTGAAACTGGCTAGGGAAAATGATTGGATAGAAACTATTATTCTATTCATTTATCCCCAGCCTACAAAATGAAAAAA
hsa-mir-664	chr1	-	220373879	220373960	hsa-mir-664	hsa-mir-664_-1_3	mature	0.35		220373891	220373912	TATTCATTTATCCCCAGCCTAC	628	GAACATTGAAACTGGCTAGGGAAAATGATTGGATAGAAACTATTATTCTATTCATTTATCCCCAGCCTACAAAATGAAAAAA
hsa-mir-670	chr11	+	43581205	43581302	hsa-mir-670	hsa-mir-670_other1	other	0.65		43581263	43581285	TTTCCTCATATTCATTCAGGAGT	31	GTTTAGGGGTGGACCTGATGTCCCTGAGTGTATGTGGTGAACCTGAATTTGCCTTGGGTTTCCTCATATTCATTCAGGAGTGTCAGTTGCCCCTTCAC
hsa-mir-670	chr11	+	43581205	43581302	hsa-mir-670	hsa-mir-670_other2	other	0.1		43581263	43581287	TTTCCTCATATTCATTCAGGAGTGT	5	GTTTAGGGGTGGACCTGATGTCCCTGAGTGTATGTGGTGAACCTGAATTTGCCTTGGGTTTCCTCATATTCATTCAGGAGTGTCAGTTGCCCCTTCAC
hsa-mir-671	chr7	+	150935506	150935623	hsa-mir-671-5p	hsa-mir-671-5p	mature	0.14	Y	150935534	150935556	AGGAAGCCCTGGAGGGGCTGGAG	252	GCAGGTGAACTGGCAGGCCAGGAAGAGGAGGAAGCCCTGGAGGGGCTGGAGGTGATGGATGTTTTCCTCCGGTTCTCAGGGCTCCACCTCTTTCGGGCCGTAGAGCCAGGGCTGGTGC
hsa-mir-671	chr7	+	150935506	150935623	hsa-mir-671-5p	hsa-mir-671-5p_+1_3	mature	0.4		150935534	150935557	AGGAAGCCCTGGAGGGGCTGGAGG	717	GCAGGTGAACTGGCAGGCCAGGAAGAGGAGGAAGCCCTGGAGGGGCTGGAGGTGATGGATGTTTTCCTCCGGTTCTCAGGGCTCCACCTCTTTCGGGCCGTAGAGCCAGGGCTGGTGC
hsa-mir-671	chr7	+	150935506	150935623	hsa-mir-671-3p	hsa-mir-671-3p	mature	0.17	Y	150935573	150935593	TCCGGTTCTCAGGGCTCCACC	314	GCAGGTGAACTGGCAGGCCAGGAAGAGGAGGAAGCCCTGGAGGGGCTGGAGGTGATGGATGTTTTCCTCCGGTTCTCAGGGCTCCACCTCTTTCGGGCCGTAGAGCCAGGGCTGGTGC
hsa-mir-675	chr11	-	2017988	2018060	hsa-mir-675*	hsa-mir-675*_+2_3	mature	0.68		2017995	2018016	CTGTATGCCCTCACCGCTCAGC	17	CCCAGGGTCTGGTGCGGAGAGGGCCCACAGTGGACTTGGTGACGCTGTATGCCCTCACCGCTCAGCCCCTGGG
hsa-mir-675	chr11	-	2017988	2018060	hsa-mir-675*	hsa-mir-675*	mature	0.04	Y	2017997	2018016	CTGTATGCCCTCACCGCTCA	1	CCCAGGGTCTGGTGCGGAGAGGGCCCACAGTGGACTTGGTGACGCTGTATGCCCTCACCGCTCAGCCCCTGGG
hsa-mir-675	chr11	-	2017988	2018060	hsa-mir-675	hsa-mir-675	mature	0.12	Y	2018029	2018051	TGGTGCGGAGAGGGCCCACAGTG	3	CCCAGGGTCTGGTGCGGAGAGGGCCCACAGTGGACTTGGTGACGCTGTATGCCCTCACCGCTCAGCCCCTGGG
hsa-mir-676	chrX	+	69242706	69242772	hsa-mir-676*	hsa-mir-676*	mature	0.09	Y	69242713	69242733	TCTTCAACCTCAGGACTTGCA	6	GCATGACTCTTCAACCTCAGGACTTGCAGAATTAATGGAATGCTGTCCTAAGGTTGTTGAGTTGTGC
hsa-mir-676	chrX	+	69242706	69242772	hsa-mir-676	hsa-mir-676	mature	0.29	Y	69242748	69242768	CTGTCCTAAGGTTGTTGAGTT	18	GCATGACTCTTCAACCTCAGGACTTGCAGAATTAATGGAATGCTGTCCTAAGGTTGTTGAGTTGTGC
hsa-mir-676	chrX	+	69242706	69242772	hsa-mir-676	hsa-mir-676_+1_3	mature	0.31		69242748	69242769	CTGTCCTAAGGTTGTTGAGTTG	19	GCATGACTCTTCAACCTCAGGACTTGCAGAATTAATGGAATGCTGTCCTAAGGTTGTTGAGTTGTGC
hsa-mir-7-1	chr9	-	86584662	86584771	hsa-mir-7-1	hsa-mir-7-1_+1_3	mature	0.38		86584725	86584748	TGGAAGACTAGTGATTTTGTTGTT	20468	TTGGATGTTGGCCTAGTTCTGTGTGGAAGACTAGTGATTTTGTTGTTTTTAGATAACTAAATCGACAACAAATCACAGTCTGCCATATGGCACAGGCCATGCCTCTACAG
hsa-mir-7-1	chr9	-	86584662	86584771	hsa-mir-7-1	hsa-mir-7-1	mature	0.36	Y	86584726	86584748	TGGAAGACTAGTGATTTTGTTGT	19516	TTGGATGTTGGCCTAGTTCTGTGTGGAAGACTAGTGATTTTGTTGTTTTTAGATAACTAAATCGACAACAAATCACAGTCTGCCATATGGCACAGGCCATGCCTCTACAG
hsa-mir-7-2	chr15	+	89155055	89155164	hsa-mir-7-2	hsa-mir-7-2	mature	0.4	Y	89155086	89155108	TGGAAGACTAGTGATTTTGTTGT	19516	CTGGATACAGAGTGGACCGGCTGGCCCCATCTGGAAGACTAGTGATTTTGTTGTTGTCTTACTGCGCTCAACAACAAATCCCAGTCTACCTAATGGTGCCAGCCATCGCA
hsa-mir-7-2	chr15	+	89155055	89155164	hsa-mir-7-2	hsa-mir-7-2_+1_3	mature	0.42		89155086	89155109	TGGAAGACTAGTGATTTTGTTGTT	20468	CTGGATACAGAGTGGACCGGCTGGCCCCATCTGGAAGACTAGTGATTTTGTTGTTGTCTTACTGCGCTCAACAACAAATCCCAGTCTACCTAATGGTGCCAGCCATCGCA
hsa-mir-7-3	chr19	+	4770681	4770790	hsa-mir-7-3	hsa-mir-7-3	mature	0.41	Y	4770711	4770733	TGGAAGACTAGTGATTTTGTTGT	19516	AGATTAGAGTGGCTGTGGTCTAGTGCTGTGTGGAAGACTAGTGATTTTGTTGTTCTGATGTACTACGACAACAAGTCACAGCCGGCCTCATAGCGCAGACTCCCTTCGAC
hsa-mir-7-3	chr19	+	4770681	4770790	hsa-mir-7-3	hsa-mir-7-3_+1_3	mature	0.43		4770711	4770734	TGGAAGACTAGTGATTTTGTTGTT	20468	AGATTAGAGTGGCTGTGGTCTAGTGCTGTGTGGAAGACTAGTGATTTTGTTGTTCTGATGTACTACGACAACAAGTCACAGCCGGCCTCATAGCGCAGACTCCCTTCGAC
hsa-mir-708	chr11	-	79113065	79113152	hsa-mir-708*	hsa-mir-708*	mature	0.01	Y	79113075	79113096	CAACTAGACTGTGAGCTTCTAG	302	AACTGCCCTCAAGGAGCTTACAATCTAGCTGGGGGTAAATGACTTGCACATGAACACAACTAGACTGTGAGCTTCTAGAGGGCAGGGA
hsa-mir-708	chr11	-	79113065	79113152	hsa-mir-708	hsa-mir-708	mature	0.38	Y	79113120	79113142	AAGGAGCTTACAATCTAGCTGGG	6513	AACTGCCCTCAAGGAGCTTACAATCTAGCTGGGGGTAAATGACTTGCACATGAACACAACTAGACTGTGAGCTTCTAGAGGGCAGGGA
hsa-mir-708	chr11	-	79113065	79113152	hsa-mir-708	hsa-mir-708_-1_3	mature	0.29		79113121	79113142	AAGGAGCTTACAATCTAGCTGG	4951	AACTGCCCTCAAGGAGCTTACAATCTAGCTGGGGGTAAATGACTTGCACATGAACACAACTAGACTGTGAGCTTCTAGAGGGCAGGGA
hsa-mir-720	chr3	+	164059128	164059237	hsa-mir-720	hsa-mir-720_+1_5	mature	0.21		164059153	164059170	ATCTCGCTGGGGCCTCCA	1217	CCGGATCTCACACGGTGGTGTTAATATCTCGCTGGGGCCTCCAAAATGTTGTGCCCAGGGGTGTTAGAGAAAACACCACACTTTGAGATGAATTAAGAGTCCTTTATTAG
hsa-mir-720	chr3	+	164059128	164059237	hsa-mir-720	hsa-mir-720	mature	0.72	Y	164059154	164059170	TCTCGCTGGGGCCTCCA	4154	CCGGATCTCACACGGTGGTGTTAATATCTCGCTGGGGCCTCCAAAATGTTGTGCCCAGGGGTGTTAGAGAAAACACCACACTTTGAGATGAATTAAGAGTCCTTTATTAG
hsa-mir-744	chr17	+	11985215	11985312	hsa-mir-744	hsa-mir-744_-1_3	mature	0.26		11985225	11985245	TGCGGGGCTAGGGCTAACAGC	433	TTGGGCAAGGTGCGGGGCTAGGGCTAACAGCAGTCTTACTGAAGGTTTCCTGGAAACCACGCACATGCTGTTGCCACTAACCTCAACCTTACTCGGTC
hsa-mir-744	chr17	+	11985215	11985312	hsa-mir-744	hsa-mir-744	mature	0.3	Y	11985225	11985246	TGCGGGGCTAGGGCTAACAGCA	501	TTGGGCAAGGTGCGGGGCTAGGGCTAACAGCAGTCTTACTGAAGGTTTCCTGGAAACCACGCACATGCTGTTGCCACTAACCTCAACCTTACTCGGTC
hsa-mir-744	chr17	+	11985215	11985312	hsa-mir-744*	hsa-mir-744*_-1_3	mature	0.2		11985282	11985302	CTGTTGCCACTAACCTCAACC	333	TTGGGCAAGGTGCGGGGCTAGGGCTAACAGCAGTCTTACTGAAGGTTTCCTGGAAACCACGCACATGCTGTTGCCACTAACCTCAACCTTACTCGGTC
hsa-mir-744	chr17	+	11985215	11985312	hsa-mir-744*	hsa-mir-744*	mature	0.03	Y	11985282	11985303	CTGTTGCCACTAACCTCAACCT	52	TTGGGCAAGGTGCGGGGCTAGGGCTAACAGCAGTCTTACTGAAGGTTTCCTGGAAACCACGCACATGCTGTTGCCACTAACCTCAACCTTACTCGGTC
hsa-mir-760	chr1	+	94312387	94312466	hsa-mir-760	hsa-mir-760	mature	0.05	Y	94312435	94312454	CGGCTCTGGGTCTGTGGGGA	1	GGCGCGTCGCCCCCCTCAGTCCACCAGAGCCCGGATACCTCAGAAATTCGGCTCTGGGTCTGTGGGGAGCGAAATGCAAC
hsa-mir-760	chr1	+	94312387	94312466	hsa-mir-760	hsa-mir-760_other1	other	0.38		94312456	94312474	CGAAATGCAACCCAAACCC	7	GGCGCGTCGCCCCCCTCAGTCCACCAGAGCCCGGATACCTCAGAAATTCGGCTCTGGGTCTGTGGGGAGCGAAATGCAAC
hsa-mir-766	chrX	-	118780700	118780810	hsa-mir-766	hsa-mir-766	mature	0.41	Y	118780725	118780746	ACTCCAGCCCCACAGCCTCAGC	48	GCATCCTCAGGACCTGGGCTTGGGTGGTAGGAGGAATTGGTGCTGGTCTTTCATTTTGGATTTGACTCCAGCCCCACAGCCTCAGCCACCCCAGCCAATTGTCATAGGAGC
hsa-mir-766	chrX	-	118780700	118780810	hsa-mir-766	hsa-mir-766_-1_3	mature	0.16		118780726	118780746	ACTCCAGCCCCACAGCCTCAG	19	GCATCCTCAGGACCTGGGCTTGGGTGGTAGGAGGAATTGGTGCTGGTCTTTCATTTTGGATTTGACTCCAGCCCCACAGCCTCAGCCACCCCAGCCAATTGTCATAGGAGC
hsa-mir-767	chrX	-	151561892	151562000	hsa-mir-767-3p	hsa-mir-767-3p_-1_3	mature	0.4		151561919	151561940	TCTGCTCATACCCCATGGTTTC	2	GCTTTTATATTGTAGGTTTTTGCTCATGCACCATGGTTGTCTGAGCATGCAGCATGCTTGTCTGCTCATACCCCATGGTTTCTGAGCAGGAACCTTCATTGTCTACTGC
hsa-mir-767	chrX	-	151561892	151562000	hsa-mir-767-5p	hsa-mir-767-5p_+1_3	mature	0.4		151561951	151561974	TGCACCATGGTTGTCTGAGCATGC	2	GCTTTTATATTGTAGGTTTTTGCTCATGCACCATGGTTGTCTGAGCATGCAGCATGCTTGTCTGCTCATACCCCATGGTTTCTGAGCAGGAACCTTCATTGTCTACTGC
hsa-mir-767	chrX	-	151561892	151562000	hsa-mir-767-5p	hsa-mir-767-5p_-1_3	mature	0.2		151561953	151561974	TGCACCATGGTTGTCTGAGCAT	1	GCTTTTATATTGTAGGTTTTTGCTCATGCACCATGGTTGTCTGAGCATGCAGCATGCTTGTCTGCTCATACCCCATGGTTTCTGAGCAGGAACCTTCATTGTCTACTGC
hsa-mir-769	chr19	+	46522189	46522306	hsa-mir-769-5p	hsa-mir-769-5p_-1_3	mature	0.18		46522218	46522238	TGAGACCTCTGGGTTCTGAGC	238	GCCTTGGTGCTGATTCCTGGGCTCTGACCTGAGACCTCTGGGTTCTGAGCTGTGATGTTGCTCTCGAGCTGGGATCTCCGGGGTCTTGGTTCAGGGCCGGGGCCTCTGGGTTCCAAGC
hsa-mir-769	chr19	+	46522189	46522306	hsa-mir-769-5p	hsa-mir-769-5p	mature	0.26	Y	46522218	46522239	TGAGACCTCTGGGTTCTGAGCT	355	GCCTTGGTGCTGATTCCTGGGCTCTGACCTGAGACCTCTGGGTTCTGAGCTGTGATGTTGCTCTCGAGCTGGGATCTCCGGGGTCTTGGTTCAGGGCCGGGGCCTCTGGGTTCCAAGC
hsa-mir-769	chr19	+	46522189	46522306	hsa-mir-769-5p	hsa-mir-769-5p_+1_3	mature	0.19		46522218	46522240	TGAGACCTCTGGGTTCTGAGCTG	258	GCCTTGGTGCTGATTCCTGGGCTCTGACCTGAGACCTCTGGGTTCTGAGCTGTGATGTTGCTCTCGAGCTGGGATCTCCGGGGTCTTGGTTCAGGGCCGGGGCCTCTGGGTTCCAAGC
hsa-mir-769	chr19	+	46522189	46522306	hsa-mir-769-5p	hsa-mir-769-5p_+2_3	mature	0.12		46522218	46522241	TGAGACCTCTGGGTTCTGAGCTGT	167	GCCTTGGTGCTGATTCCTGGGCTCTGACCTGAGACCTCTGGGTTCTGAGCTGTGATGTTGCTCTCGAGCTGGGATCTCCGGGGTCTTGGTTCAGGGCCGGGGCCTCTGGGTTCCAAGC
hsa-mir-769	chr19	+	46522189	46522306	hsa-mir-769-3p	hsa-mir-769-3p	mature	0.02	Y	46522257	46522279	CTGGGATCTCCGGGGTCTTGGTT	28	GCCTTGGTGCTGATTCCTGGGCTCTGACCTGAGACCTCTGGGTTCTGAGCTGTGATGTTGCTCTCGAGCTGGGATCTCCGGGGTCTTGGTTCAGGGCCGGGGCCTCTGGGTTCCAAGC
hsa-mir-802	chr21	+	37093012	37093105	hsa-mir-802	hsa-mir-802_-1_3_+1_5	mature	0.7		37093028	37093050	TCAGTAACAAAGATTCATCCTTG	7	GTTCTGTTATTTGCAGTCAGTAACAAAGATTCATCCTTGTGTCCATCATGCAACAAGGAGAATCTTTGTCACTTAGTGTAATTAATAGCTGGAC
hsa-mir-802	chr21	+	37093012	37093105	hsa-mir-802-star	hsa-mir-802-star_+1_3_-1_5	star	0.3		37093067	37093088	AGGAGAATCTTTGTCACTTAGT	3	GTTCTGTTATTTGCAGTCAGTAACAAAGATTCATCCTTGTGTCCATCATGCAACAAGGAGAATCTTTGTCACTTAGTGTAATTAATAGCTGGAC
hsa-mir-877	chr6	+	30552108	30552193	hsa-mir-877	hsa-mir-877	mature	0.02	Y	30552108	30552127	GTAGAGGAGATGGCGCAGGG	3	GTAGAGGAGATGGCGCAGGGGACACGGGCAAAGACTTGGGGGTTCCTGGGACCCTCAGACGTGTGTCCTCTTCTCCCTCCTCCCAG
hsa-mir-877	chr6	+	30552108	30552193	hsa-mir-877*	hsa-mir-877*	mature	0.43	Y	30552173	30552193	TCCTCTTCTCCCTCCTCCCAG	45	GTAGAGGAGATGGCGCAGGGGACACGGGCAAAGACTTGGGGGTTCCTGGGACCCTCAGACGTGTGTCCTCTTCTCCCTCCTCCCAG
hsa-mir-885	chr3	-	10436172	10436245	hsa-mir-885-5p	hsa-mir-885-5p	mature	0.87	Y	10436214	10436235	TCCATTACACTACCCTGCCTCT	35	CCGCACTCTCTCCATTACACTACCCTGCCTCTTCTCCATGAGAGGCAGCGGGGTGTAGTGGATAGAGCACGGGT
hsa-mir-887	chr5	+	15935290	15935368	hsa-mir-887	hsa-mir-887	mature	0.13	Y	15935337	15935358	GTGAACGGGCGCCATCCCGAGG	8	GTGCAGATCCTTGGGAGCCCTGTTAGACTCTGGATTTTACACTTGGAGTGAACGGGCGCCATCCCGAGGCTTTGCACAG
hsa-mir-887	chr5	+	15935290	15935368	hsa-mir-887	hsa-mir-887_+1_3	mature	0.19		15935337	15935359	GTGAACGGGCGCCATCCCGAGGC	12	GTGCAGATCCTTGGGAGCCCTGTTAGACTCTGGATTTTACACTTGGAGTGAACGGGCGCCATCCCGAGGCTTTGCACAG
hsa-mir-887	chr5	+	15935290	15935368	hsa-mir-887	hsa-mir-887_+2_3	mature	0.31		15935337	15935360	GTGAACGGGCGCCATCCCGAGGCT	19	GTGCAGATCCTTGGGAGCCCTGTTAGACTCTGGATTTTACACTTGGAGTGAACGGGCGCCATCCCGAGGCTTTGCACAG
hsa-mir-888	chrX	-	145076301	145076377	hsa-mir-888*	hsa-mir-888*_-2_3_+1_5	mature	0.16		145076313	145076333	TGACTGACACCTCTTTGGGTG	2	GGCAGTGCTCTACTCAAAAAGCTGTCAGTCACTTAGATTACATGTGACTGACACCTCTTTGGGTGAAGGAAGGCTCA
hsa-mir-888	chrX	-	145076301	145076377	hsa-mir-888	hsa-mir-888_+1_3	mature	0.41		145076346	145076367	TACTCAAAAAGCTGTCAGTCAC	5	GGCAGTGCTCTACTCAAAAAGCTGTCAGTCACTTAGATTACATGTGACTGACACCTCTTTGGGTGAAGGAAGGCTCA
hsa-mir-888	chrX	-	145076301	145076377	hsa-mir-888	hsa-mir-888	mature	0.33	Y	145076347	145076367	TACTCAAAAAGCTGTCAGTCA	4	GGCAGTGCTCTACTCAAAAAGCTGTCAGTCACTTAGATTACATGTGACTGACACCTCTTTGGGTGAAGGAAGGCTCA
hsa-mir-889	chr14	+	101514237	101514315	hsa-mir-889	hsa-mir-889	mature	1	Y	101514285	101514305	TTAATATCGGACAACCATTGT	9	GTGCTTAAAGAATGGCTGTCCGTAGTATGGTCTCTATATTTATGATGATTAATATCGGACAACCATTGTTTTAGTATCC
hsa-mir-890	chrX	-	145075792	145075868	hsa-mir-890-star	hsa-mir-890-star_+2_5	star	0.12		145075802	145075824	TAACTATTCCCTTTCTGAGTAGA	1	GGAAGTGCCCTACTTGGAAAGGCATCAGTTGCTTAGATTACATGTAACTATTCCCTTTCTGAGTAGAGTAAGTCTTA
hsa-mir-890	chrX	-	145075792	145075868	hsa-mir-890	hsa-mir-890_+1_3	mature	0.62		145075837	145075858	TACTTGGAAAGGCATCAGTTGC	5	GGAAGTGCCCTACTTGGAAAGGCATCAGTTGCTTAGATTACATGTAACTATTCCCTTTCTGAGTAGAGTAAGTCTTA
hsa-mir-890	chrX	-	145075792	145075868	hsa-mir-890	hsa-mir-890	mature	0.25	Y	145075838	145075858	TACTTGGAAAGGCATCAGTTG	2	GGAAGTGCCCTACTTGGAAAGGCATCAGTTGCTTAGATTACATGTAACTATTCCCTTTCTGAGTAGAGTAAGTCTTA
hsa-mir-891a	chrX	-	145109311	145109389	hsa-mir-891a	hsa-mir-891a_+1_3	mature	0.23		145109357	145109379	TGCAACGAACCTGAGCCACTGAT	9	CCTTAATCCTTGCAACGAACCTGAGCCACTGATTCAGTAAAATACTCAGTGGCACATGTTTGTTGTGAGGGTCAAAAGA
hsa-mir-891a	chrX	-	145109311	145109389	hsa-mir-891a	hsa-mir-891a	mature	0.64	Y	145109358	145109379	TGCAACGAACCTGAGCCACTGA	25	CCTTAATCCTTGCAACGAACCTGAGCCACTGATTCAGTAAAATACTCAGTGGCACATGTTTGTTGTGAGGGTCAAAAGA
hsa-mir-891b	chrX	-	145082570	145082648	hsa-mir-891b	hsa-mir-891b	mature	0.6	Y	145082617	145082638	TGCAACTTACCTGAGTCATTGA	9	CCTTAATCCTTGCAACTTACCTGAGTCATTGATTCAGTAAAACATTCAATGGCACATGTTTGTTGTTAGGGTCAAAAGA
hsa-mir-891b	chrX	-	145082570	145082648	hsa-mir-891b	hsa-mir-891b_-1_3	mature	0.26		145082618	145082638	TGCAACTTACCTGAGTCATTG	4	CCTTAATCCTTGCAACTTACCTGAGTCATTGATTCAGTAAAACATTCAATGGCACATGTTTGTTGTTAGGGTCAAAAGA
hsa-mir-9-1	chr1	-	156390132	156390220	hsa-mir-9-1*	hsa-mir-9-1*	mature	0.18	Y	156390145	156390166	ATAAAGCTAGATAACCGAAAGT	10413	CGGGGTTGGTTGTTATCTTTGGTTATCTAGCTGTATGAGTGGTGTGGAGTCTTCATAAAGCTAGATAACCGAAAGTAAAAATAACCCCA
hsa-mir-9-1	chr1	-	156390132	156390220	hsa-mir-9-1	hsa-mir-9-1	mature	0.39	Y	156390183	156390205	TCTTTGGTTATCTAGCTGTATGA	22890	CGGGGTTGGTTGTTATCTTTGGTTATCTAGCTGTATGAGTGGTGTGGAGTCTTCATAAAGCTAGATAACCGAAAGTAAAAATAACCCCA
hsa-mir-9-1	chr1	-	156390132	156390220	hsa-mir-9-1	hsa-mir-9-1_-2_3	mature	0.1		156390185	156390205	TCTTTGGTTATCTAGCTGTAT	6147	CGGGGTTGGTTGTTATCTTTGGTTATCTAGCTGTATGAGTGGTGTGGAGTCTTCATAAAGCTAGATAACCGAAAGTAAAAATAACCCCA
hsa-mir-9-2	chr5	-	87962670	87962756	hsa-mir-9-2*	hsa-mir-9-2*	mature	0.18	Y	87962683	87962704	ATAAAGCTAGATAACCGAAAGT	10413	GGAAGCGAGTTGTTATCTTTGGTTATCTAGCTGTATGAGTGTATTGGTCTTCATAAAGCTAGATAACCGAAAGTAAAAACTCCTTCA
hsa-mir-9-2	chr5	-	87962670	87962756	hsa-mir-9-2	hsa-mir-9-2	mature	0.39	Y	87962719	87962741	TCTTTGGTTATCTAGCTGTATGA	22890	GGAAGCGAGTTGTTATCTTTGGTTATCTAGCTGTATGAGTGTATTGGTCTTCATAAAGCTAGATAACCGAAAGTAAAAACTCCTTCA
hsa-mir-9-2	chr5	-	87962670	87962756	hsa-mir-9-2	hsa-mir-9-2_-2_3	mature	0.1		87962721	87962741	TCTTTGGTTATCTAGCTGTAT	6147	GGAAGCGAGTTGTTATCTTTGGTTATCTAGCTGTATGAGTGTATTGGTCTTCATAAAGCTAGATAACCGAAAGTAAAAACTCCTTCA
hsa-mir-9-3	chr15	+	89911247	89911336	hsa-mir-9-3	hsa-mir-9-3_-2_3	mature	0.1		89911262	89911282	TCTTTGGTTATCTAGCTGTAT	6147	GGAGGCCCGTTTCTCTCTTTGGTTATCTAGCTGTATGAGTGCCACAGAGCCGTCATAAAGCTAGATAACCGAAAGTAGAAATGATTCTCA
hsa-mir-9-3	chr15	+	89911247	89911336	hsa-mir-9-3	hsa-mir-9-3	mature	0.4	Y	89911262	89911284	TCTTTGGTTATCTAGCTGTATGA	22890	GGAGGCCCGTTTCTCTCTTTGGTTATCTAGCTGTATGAGTGCCACAGAGCCGTCATAAAGCTAGATAACCGAAAGTAGAAATGATTCTCA
hsa-mir-9-3	chr15	+	89911247	89911336	hsa-mir-9-3*	hsa-mir-9-3*	mature	0.18	Y	89911301	89911322	ATAAAGCTAGATAACCGAAAGT	10413	GGAGGCCCGTTTCTCTCTTTGGTTATCTAGCTGTATGAGTGCCACAGAGCCGTCATAAAGCTAGATAACCGAAAGTAGAAATGATTCTCA
hsa-mir-92a-1	chr13	+	92003567	92003644	hsa-mir-92a-1	hsa-mir-92a-1	mature	0.76	Y	92003614	92003635	TATTGCACTTGTCCCGGCCTGT	606586	CTTTCTACACAGGTTGGGATCGGTTGCAATGCTGTGTTTCTGTATGGTATTGCACTTGTCCCGGCCTGTTGAGTTTGG
hsa-mir-92a-1	chr13	+	92003567	92003644	hsa-mir-92a-1	hsa-mir-92a-1_+1_3	mature	0.1		92003614	92003636	TATTGCACTTGTCCCGGCCTGTT	84305	CTTTCTACACAGGTTGGGATCGGTTGCAATGCTGTGTTTCTGTATGGTATTGCACTTGTCCCGGCCTGTTGAGTTTGG
hsa-mir-92a-2	chrX	-	133303567	133303641	hsa-mir-92a-2	hsa-mir-92a-2	mature	0.81	Y	133303573	133303594	TATTGCACTTGTCCCGGCCTGT	606586	TCATCCCTGGGTGGGGATTTGTTGCATTACTTGTGTTCTATATAAAGTATTGCACTTGTCCCGGCCTGTGGAAGA
hsa-mir-92b	chr1	+	155164967	155165062	hsa-mir-92b*	hsa-mir-92b*	mature	0	Y	155164986	155165007	AGGGACGGGACGCGGTGCAGTG	2	CGGGCCCCGGGCGGGCGGGAGGGACGGGACGCGGTGCAGTGTTGTTTTTTCCCCCGCCAATATTGCACTCGTCCCGGCCTCCGGCCCCCCCGGCCC
hsa-mir-92b	chr1	+	155164967	155165062	hsa-mir-92b	hsa-mir-92b_-2_3	mature	0.12		155165027	155165046	TATTGCACTCGTCCCGGCCT	5333	CGGGCCCCGGGCGGGCGGGAGGGACGGGACGCGGTGCAGTGTTGTTTTTTCCCCCGCCAATATTGCACTCGTCCCGGCCTCCGGCCCCCCCGGCCC
hsa-mir-92b	chr1	+	155164967	155165062	hsa-mir-92b	hsa-mir-92b_-1_3	mature	0.26		155165027	155165047	TATTGCACTCGTCCCGGCCTC	11387	CGGGCCCCGGGCGGGCGGGAGGGACGGGACGCGGTGCAGTGTTGTTTTTTCCCCCGCCAATATTGCACTCGTCCCGGCCTCCGGCCCCCCCGGCCC
hsa-mir-92b	chr1	+	155164967	155165062	hsa-mir-92b	hsa-mir-92b	mature	0.45	Y	155165027	155165048	TATTGCACTCGTCCCGGCCTCC	19819	CGGGCCCCGGGCGGGCGGGAGGGACGGGACGCGGTGCAGTGTTGTTTTTTCCCCCGCCAATATTGCACTCGTCCCGGCCTCCGGCCCCCCCGGCCC
hsa-mir-92b	chr1	+	155164967	155165062	hsa-mir-92b	hsa-mir-92b_+1_3	mature	0.1		155165027	155165049	TATTGCACTCGTCCCGGCCTCCG	4334	CGGGCCCCGGGCGGGCGGGAGGGACGGGACGCGGTGCAGTGTTGTTTTTTCCCCCGCCAATATTGCACTCGTCCCGGCCTCCGGCCCCCCCGGCCC
hsa-mir-93	chr7	-	99691390	99691469	hsa-mir-93*	hsa-mir-93*	mature	0.05	Y	99691399	99691420	ACTGCTGAGCTAGCACTTCCCG	2684	CTGGGGGCTCCAAAGTGCTGTTCGTGCAGGTAGTGTGATTACCCAACCTACTGCTGAGCTAGCACTTCCCGAGCCCCCGG
hsa-mir-93	chr7	-	99691390	99691469	hsa-mir-93	hsa-mir-93	mature	0.57	Y	99691437	99691459	CAAAGTGCTGTTCGTGCAGGTAG	26087	CTGGGGGCTCCAAAGTGCTGTTCGTGCAGGTAGTGTGATTACCCAACCTACTGCTGAGCTAGCACTTCCCGAGCCCCCGG
hsa-mir-935	chr19	+	54485560	54485650	hsa-mir-935	hsa-mir-935	mature	0.05	Y	54485615	54485637	CCAGTTACCGCTTCCGCTACCGC	21	GGCGGGGGCGCGGGCGGCAGTGGCGGGAGCGGCCCCTCGGCCATCCTCCGTCTGCCCAGTTACCGCTTCCGCTACCGCCGCCGCTCCCGCT
hsa-mir-935	chr19	+	54485560	54485650	hsa-mir-935	hsa-mir-935_-1_3_-1_5	mature	0.33		54485616	54485636	CAGTTACCGCTTCCGCTACCG	124	GGCGGGGGCGCGGGCGGCAGTGGCGGGAGCGGCCCCTCGGCCATCCTCCGTCTGCCCAGTTACCGCTTCCGCTACCGCCGCCGCTCCCGCT
hsa-mir-935	chr19	+	54485560	54485650	hsa-mir-935	hsa-mir-935_-1_5	mature	0.49		54485616	54485637	CAGTTACCGCTTCCGCTACCGC	181	GGCGGGGGCGCGGGCGGCAGTGGCGGGAGCGGCCCCTCGGCCATCCTCCGTCTGCCCAGTTACCGCTTCCGCTACCGCCGCCGCTCCCGCT
hsa-mir-937	chr8	-	144895126	144895211	hsa-mir-937	hsa-mir-937_-1_3	mature	0.3		144895141	144895161	ATCCGCGCTCTGACTCTCTGC	3	AGCACTGCCCCCGGTGAGTCAGGGTGGGGCTGGCCCCCTGCTTCGTGCCCATCCGCGCTCTGACTCTCTGCCCACCTGCAGGAGCT
hsa-mir-937	chr8	-	144895126	144895211	hsa-mir-937	hsa-mir-937_other1	other	0.6		144895143	144895164	CCCATCCGCGCTCTGACTCTCT	6	AGCACTGCCCCCGGTGAGTCAGGGTGGGGCTGGCCCCCTGCTTCGTGCCCATCCGCGCTCTGACTCTCTGCCCACCTGCAGGAGCT
hsa-mir-940	chr16	+	2321747	2321840	hsa-mir-940	hsa-mir-940_-2_3	mature	0.2		2321806	2321824	AAGGCAGGGCCCCCGCTCC	5	GTGAGGTGTGGGCCCGGCCCCAGGAGCGGGGCCTGGGCAGCCCCGTGTGTTGAGGAAGGAAGGCAGGGCCCCCGCTCCCCGGGCCTGACCCCAC
hsa-mir-940	chr16	+	2321747	2321840	hsa-mir-940	hsa-mir-940_-1_3	mature	0.12		2321806	2321825	AAGGCAGGGCCCCCGCTCCC	3	GTGAGGTGTGGGCCCGGCCCCAGGAGCGGGGCCTGGGCAGCCCCGTGTGTTGAGGAAGGAAGGCAGGGCCCCCGCTCCCCGGGCCTGACCCCAC
hsa-mir-940	chr16	+	2321747	2321840	hsa-mir-940	hsa-mir-940	mature	0.36	Y	2321806	2321826	AAGGCAGGGCCCCCGCTCCCC	9	GTGAGGTGTGGGCCCGGCCCCAGGAGCGGGGCCTGGGCAGCCCCGTGTGTTGAGGAAGGAAGGCAGGGCCCCCGCTCCCCGGGCCTGACCCCAC
hsa-mir-940	chr16	+	2321747	2321840	hsa-mir-940	hsa-mir-940_+2_3	mature	0.2		2321806	2321828	AAGGCAGGGCCCCCGCTCCCCGG	5	GTGAGGTGTGGGCCCGGCCCCAGGAGCGGGGCCTGGGCAGCCCCGTGTGTTGAGGAAGGAAGGCAGGGCCCCCGCTCCCCGGGCCTGACCCCAC
hsa-mir-941-1	chr20	+	62550777	62550893	hsa-mir-941-1	hsa-mir-941-1	mature	0.8	Y	62550847	62550869	CACCCGGCTGTGTGCACATGTGC	84	CACGGAAGAGGACACACCCGGCTGTGTGGACATGTGCCCAGGGCCCGGGACAGCGCCACGGAAGAGGACGCACCCGGCTGTGTGCACATGTGCCCAGGGCCCGGGACAGCGCCACGG
hsa-mir-941-3	chr20	+	62551084	62551200	hsa-mir-941-3	hsa-mir-941-3	mature	0.4	Y	62551098	62551120	CACCCGGCTGTGTGCACATGTGC	84	CACGGAAGAGGACGCACCCGGCTGTGTGCACATGTGCCCAGGGCCCGGGACAGCGCCACGGAAGAGGACGCACCCGGCTGTGTGCACATGTGCCCAGGGCCCGGGACAGCGCCATGG
hsa-mir-941-3	chr20	+	62551084	62551200	hsa-mir-941-3	hsa-mir-941-3_other1	other	0.4		62551154	62551176	CACCCGGCTGTGTGCACATGTGC	84	CACGGAAGAGGACGCACCCGGCTGTGTGCACATGTGCCCAGGGCCCGGGACAGCGCCACGGAAGAGGACGCACCCGGCTGTGTGCACATGTGCCCAGGGCCCGGGACAGCGCCATGG
hsa-mir-941-4	chr20	+	62551196	62551312	hsa-mir-941-4	hsa-mir-941-4	mature	0.4	Y	62551210	62551232	CACCCGGCTGTGTGCACATGTGC	84	CATGGAAGAGGACGCACCCGGCTGTGTGCACATGTGCCCAGGGCCCGGGACAGCGCCACGGAAGAGGACGCACCCGGCTGTGTGCACATGTGCCCAGGGCCCGGGACAGCGCCACGG
hsa-mir-941-4	chr20	+	62551196	62551312	hsa-mir-941-4	hsa-mir-941-4_other1	other	0.4		62551266	62551288	CACCCGGCTGTGTGCACATGTGC	84	CATGGAAGAGGACGCACCCGGCTGTGTGCACATGTGCCCAGGGCCCGGGACAGCGCCACGGAAGAGGACGCACCCGGCTGTGTGCACATGTGCCCAGGGCCCGGGACAGCGCCACGG
hsa-mir-942	chr1	+	117637264	117637349	hsa-mir-942	hsa-mir-942_-1_3	mature	0.11		117637276	117637296	TCTTCTCTGTTTTGGCCATGT	1032	ATTAGGAGAGTATCTTCTCTGTTTTGGCCATGTGTGTACTCACAGCCCCTCACACATGGCCGAAACAGAGAAGTTACTTTCCTAAT
hsa-mir-942	chr1	+	117637264	117637349	hsa-mir-942	hsa-mir-942	mature	0.12	Y	117637276	117637297	TCTTCTCTGTTTTGGCCATGTG	1150	ATTAGGAGAGTATCTTCTCTGTTTTGGCCATGTGTGTACTCACAGCCCCTCACACATGGCCGAAACAGAGAAGTTACTTTCCTAAT
hsa-mir-942	chr1	+	117637264	117637349	hsa-mir-942	hsa-mir-942_+1_3	mature	0.17		117637276	117637298	TCTTCTCTGTTTTGGCCATGTGT	1563	ATTAGGAGAGTATCTTCTCTGTTTTGGCCATGTGTGTACTCACAGCCCCTCACACATGGCCGAAACAGAGAAGTTACTTTCCTAAT
hsa-mir-942	chr1	+	117637264	117637349	hsa-mir-942	hsa-mir-942_+1_3_-2_5	mature	0.22		117637278	117637298	TTCTCTGTTTTGGCCATGTGT	2052	ATTAGGAGAGTATCTTCTCTGTTTTGGCCATGTGTGTACTCACAGCCCCTCACACATGGCCGAAACAGAGAAGTTACTTTCCTAAT
hsa-mir-942	chr1	+	117637264	117637349	hsa-mir-942	hsa-mir-942_other1	other	0.2		117637278	117637300	TTCTCTGTTTTGGCCATGTGTGT	1875	ATTAGGAGAGTATCTTCTCTGTTTTGGCCATGTGTGTACTCACAGCCCCTCACACATGGCCGAAACAGAGAAGTTACTTTCCTAAT
hsa-mir-944	chr3	+	189547710	189547797	hsa-mir-944	hsa-mir-944	mature	0.86	Y	189547763	189547784	AAATTATTGTACATCGGATGAG	66	GTTCCAGACACATCTCATCTGATATACAATATTTTCTTAAATTGTATAAAGAGAAATTATTGTACATCGGATGAGCTGTGTCTGGGAT
hsa-mir-95	chr4	-	8007027	8007107	hsa-mir-95	hsa-mir-95_+1_3	mature	0.1		8007037	8007059	TTCAACGGGTATTTATTGAGCAC	2834	AACACAGTGGGCACTCAATAAATGTCTGTTGAATTGAAATGCGTTACATTCAACGGGTATTTATTGAGCACCCACTCTGTG
hsa-mir-95	chr4	-	8007027	8007107	hsa-mir-95	hsa-mir-95	mature	0.28	Y	8007038	8007059	TTCAACGGGTATTTATTGAGCA	7774	AACACAGTGGGCACTCAATAAATGTCTGTTGAATTGAAATGCGTTACATTCAACGGGTATTTATTGAGCACCCACTCTGTG
hsa-mir-95	chr4	-	8007027	8007107	hsa-mir-95	hsa-mir-95_-1_3	mature	0.44		8007039	8007059	TTCAACGGGTATTTATTGAGC	12028	AACACAGTGGGCACTCAATAAATGTCTGTTGAATTGAAATGCGTTACATTCAACGGGTATTTATTGAGCACCCACTCTGTG
hsa-mir-96	chr7	-	129414531	129414608	hsa-mir-96	hsa-mir-96	mature	0.76	Y	129414578	129414600	TTTGGCACTAGCACATTTTTGCT	102100	TGGCCGATTTTGGCACTAGCACATTTTTGCTTGTGTCTCTCCGCTCTGAGCAATCATGTGCAGTGCCAATATGGGAAA
hsa-mir-98	chrX	-	53583183	53583301	hsa-mir-98-star	hsa-mir-98-star	star	0.11		53583201	53583222	CTATACAACTTACTACTTTCCC	4162	AGGATTCTGCTCATGCCAGGGTGAGGTAGTAAGTTGTATTGTTGTGGGGTAGGGATATTAGGCCCCAATTAGAAGATAACTATACAACTTACTACTTTCCCTGGTGTGTGGCATATTCA
hsa-mir-98	chrX	-	53583183	53583301	hsa-mir-98	hsa-mir-98	mature	0.54	Y	53583259	53583280	TGAGGTAGTAAGTTGTATTGTT	19381	AGGATTCTGCTCATGCCAGGGTGAGGTAGTAAGTTGTATTGTTGTGGGGTAGGGATATTAGGCCCCAATTAGAAGATAACTATACAACTTACTACTTTCCCTGGTGTGTGGCATATTCA
hsa-mir-98	chrX	-	53583183	53583301	hsa-mir-98	hsa-mir-98_-1_3	mature	0.14		53583260	53583280	TGAGGTAGTAAGTTGTATTGT	5261	AGGATTCTGCTCATGCCAGGGTGAGGTAGTAAGTTGTATTGTTGTGGGGTAGGGATATTAGGCCCCAATTAGAAGATAACTATACAACTTACTACTTTCCCTGGTGTGTGGCATATTCA
hsa-mir-99a	chr21	+	17911408	17911488	hsa-mir-99a	hsa-mir-99a_-1_3	mature	0.21		17911420	17911440	AACCCGTAGATCCGATCTTGT	8	CCCATTGGCATAAACCCGTAGATCCGATCTTGTGGTGAAGTGGACCGCACAAGCTCGCTTCTATGGGTCTGTGTCAGTGTG
hsa-mir-99a	chr21	+	17911408	17911488	hsa-mir-99a	hsa-mir-99a	mature	0.76	Y	17911420	17911441	AACCCGTAGATCCGATCTTGTG	29	CCCATTGGCATAAACCCGTAGATCCGATCTTGTGGTGAAGTGGACCGCACAAGCTCGCTTCTATGGGTCTGTGTCAGTGTG
hsa-mir-99b	chr19	+	52195864	52195933	hsa-mir-99b	hsa-mir-99b_-1_3	mature	0.42		52195870	52195890	CACCCGTAGAACCGACCTTGC	7978	GGCACCCACCCGTAGAACCGACCTTGCGGGGCCTTCGCCGCACACAAGCTCGTGTCTGTGGGTCCGTGTC
hsa-mir-99b	chr19	+	52195864	52195933	hsa-mir-99b	hsa-mir-99b	mature	0.35	Y	52195870	52195891	CACCCGTAGAACCGACCTTGCG	6729	GGCACCCACCCGTAGAACCGACCTTGCGGGGCCTTCGCCGCACACAAGCTCGTGTCTGTGGGTCCGTGTC
hsa-mir-99b	chr19	+	52195864	52195933	hsa-mir-99b*	hsa-mir-99b*	mature	0	Y	52195908	52195929	CAAGCTCGTGTCTGTGGGTCCG	37	GGCACCCACCCGTAGAACCGACCTTGCGGGGCCTTCGCCGCACACAAGCTCGTGTCTGTGGGTCCGTGTC
